# Supplementary material for: Multi-omics investigation of Clostridioides difficile-colonized patients reveals pathogen and commensal correlates of C. difficile pathogenesis
Source: eLife. 2022 Jan 27;11:e72801. doi: 10.7554/eLife.72801 (PMC8794467; doi:10.7554/eLife.72801)
Supplement: Figure 1—source data 1. [file elife-72801-fig1-data1.xlsx]

## Sheet: Sheet1
Strain Number	EIA status	A450	A620	A450-620	Toxin present (based on threshold of negative control+0.1)
SF64	negative	0.568	0.04	0.528	1
SF65	negative	0.479	0.041	0.438	1
SF66	negative	0.474	0.043	0.431	1
SF67	negative	0.406	0.04	0.366	0
SF68	negative	0.226	0.039	0.187	0
SF69	negative	0.253	0.041	0.212	0
SF70	negative	0.251	0.039	0.212	0
SF71	negative	0.153	0.038	0.115	0
SF73	negative	1.371	0.043	1.328	1
SF72	negative	0.877	0.04	0.837	1
SF83	negative	0.405	0.038	0.367	0
SF85	negative	0.772	0.04	0.732	1
SF89	negative	0.268	0.04	0.228	0
SF91	negative	0.468	0.04	0.428	1
SF93	negative	0.316	0.04	0.276	0
SF94	negative	0.251	0.039	0.212	0
SF96	negative	0.15	0.039	0.111	0
SF103	negative	0.758	0.048	0.71	1
SF105	negative	0.458	0.04	0.418	1
SF107	negative	0.598	0.042	0.556	1
SF108	negative	0.516	0.039	0.477	1
SF109	negative	0.731	0.041	0.69	1
SF110	negative	0.492	0.043	0.449	1
SF111	negative	0.136	0.041	0.095	0
SF112	negative	0.422	0.039	0.383	0
SF113	negative	0.349	0.039	0.31	0
SF114	negative	0.313	0.04	0.273	0
SF115	negative	0.349	0.04	0.309	0
SF116	negative	0.309	0.041	0.268	0
SF117	negative	0.186	0.04	0.146	0
SF119	negative	0.559	0.042	0.517	1
SF120	negative	0.724	0.041	0.683	1
SF121	negative	0.158	0.04	0.118	0
SF122	negative	0.256	0.043	0.213	0
SF123	negative	0.315	0.041	0.274	0
SF125	negative	1.008	0.116	0.892	1
SF127	negative	0.724	0.041	0.683	1
SF130	negative	0.508	0.041	0.467	1
SF131	negative	0.429	0.039	0.39	1
SF132	negative	0.506	0.042	0.464	1
SF136	negative	0.766	0.042	0.724	1
SF141	negative	0.177	0.04	0.137	0
SF142	negative	0.229	0.05	0.179	0
SF143	negative	0.433	0.039	0.394	1
SF148	negative	0.446	0.039	0.407	1
SF149	negative	0.314	0.048	0.266	0
SF150	negative	0.336	0.057	0.279	0
SF151	negative	0.377	0.04	0.337	0
SF153	negative	0.23	0.041	0.189	0
SF155	negative	0.375	0.04	0.335	0
SF156	negative	0.243	0.038	0.205	0
SF157	negative	0.205	0.047	0.158	0
SF161	negative	2.877	0.045	2.832	1	Toxin producing in EIA-
SF165	negative	0.272	0.04	0.232	0	24
SF74	positive	0.301	0.039	0.262	0
SF75	positive	0.645	0.041	0.604	1
SF76	positive	0.783	0.04	0.743	1
SF77	positive	1.201	0.053	1.148	1
SF78	positive	0.58	0.044	0.536	1
SF79	positive	0.41	0.04	0.37	0
SF80	positive	0.635	0.04	0.595	1
SF81	positive	0.314	0.04	0.274	0
SF82	positive	3.511	0.042	3.469	1
SF84	positive	0.695	0.037	0.658	1
SF86	positive	0.701	0.04	0.661	1
SF87	positive	0.276	0.04	0.236	0
SF88	positive	0.433	0.042	0.391	1
SF90	positive	0.243	0.04	0.203	0
SF92	positive	0.556	0.046	0.51	1
SF95	positive	0.239	0.04	0.199	0
SF97	positive	0.286	0.039	0.247	0
SF98	positive	0.327	0.041	0.286	0
SF99	positive	0.354	0.039	0.315	0
SF100	positive	0.963	0.041	0.922	1
SF101	positive	1.044	0.063	0.981	1
SF102	positive	0.813	0.04	0.773	1
SF104	positive	0.315	0.04	0.275	0
SF106	positive	0.884	0.042	0.842	1
SF118	positive	0.352	0.047	0.305	0
SF124	positive	0.666	0.041	0.625	1
SF126	positive	0.484	0.044	0.44	1
SF128	positive	0.856	0.045	0.811	1
SF129	positive	0.365	0.04	0.325	0
SF133	positive	0.288	0.04	0.248	0
SF134	positive	0.464	0.039	0.425	1
SF135	positive	0.194	0.031	0.163	0
SF137	positive	0.301	0.044	0.257	0
SF138	positive	0.36	0.039	0.321	0
SF139	positive	0.508	0.04	0.468	1
SF140	positive	0.162	0.04	0.122	0
SF144	positive	0.622	0.04	0.582	1
SF145	positive	1.218	0.048	1.17	1
SF146	positive	0.265	0.041	0.224	0
SF147	positive	0.135	0.041	0.094	0
SF152	positive	0.193	0.041	0.152	0
SF154	positive	0.375	0.04	0.335	0
SF158	positive	0.244	0.039	0.205	0
SF159	positive	0.216	0.037	0.179	0
SF160	positive	2.515	0.046	2.469	1
SF162	positive	2.394	0.046	2.348	1
SF163	positive	0.399	0.041	0.358	0
SF164	positive	1.39	0.041	1.349	1
	Positive Control	4	0.043	3.957	1	Toxin producing in EIA+
	Negative control	0.324	0.039	0.285	0	24
