# Supplementary material for: Multi-omics investigation of Clostridioides difficile-colonized patients reveals pathogen and commensal correlates of C. difficile pathogenesis
Source: eLife. 2022 Jan 27;11:e72801. doi: 10.7554/eLife.72801 (PMC8794467; doi:10.7554/eLife.72801)
Supplement: Figure 3—source data 1. [file elife-72801-fig3-data1.xlsx]

## Sheet: Sheet1
	SF64,Fructose		SF64,Lactulose		SF64,Rhamnose		SF64,Sorbitol		SF64,Sucrose		SF65,Fructose		SF65,Lactulose		SF65,Rhamnose		SF65,Sorbitol		SF65,Sucrose		SF67,Fructose		SF67,Lactulose		SF67,Rhamnose		SF67,Sorbitol		SF67,Sucrose		SF74,Fructose		SF74,Lactulose		SF74,Rhamnose		SF74,Sorbitol		SF74,Sucrose		SF76,Fructose		SF76,Lactulose		SF76,Rhamnose		SF76,Sorbitol		SF76,Sucrose
0:14:22	0.095	0.097	0.094	0.091	0.11	0.098	0.139	0.141	0.096	0.092	0.091	0.092	0.094	0.11	0.092	0.095	0.108	0.126	0.094	0.163	0.093	0.092	0.106	0.103	0.093	0.093	0.097	0.096	0.094	0.095	0.092	0.094	0.1	0.112	0.096	0.097	0.103	0.108	0.095	0.092	0.092	0.092	0.093	0.094	0.093	0.109	0.111	0.096	0.094
0:29:22	0.094	0.096	0.093	0.09	0.097	0.102	0.139	0.14	0.096	0.092	0.091	0.091	0.093	0.111	0.09	0.094	0.106	0.12	0.093	0.151	0.094	0.091	0.105	0.102	0.093	0.093	0.096	0.097	0.093	0.095	0.092	0.094	0.1	0.112	0.096	0.096	0.102	0.107	0.095	0.092	0.092	0.092	0.093	0.094	0.093	0.108	0.11	0.096	0.093
0:44:22	0.094	0.096	0.094	0.09	0.101	0.092	0.141	0.141	0.095	0.092	0.09	0.09	0.092	0.109	0.09	0.093	0.105	0.135	0.093	0.139	0.093	0.091	0.105	0.102	0.092	0.093	0.096	0.097	0.092	0.094	0.092	0.094	0.1	0.112	0.096	0.095	0.104	0.109	0.094	0.092	0.092	0.092	0.093	0.094	0.093	0.107	0.109	0.095	0.093
0:59:22	0.094	0.096	0.1	0.09	0.096	0.092	0.142	0.144	0.095	0.092	0.09	0.09	0.092	0.112	0.09	0.094	0.105	0.108	0.093	0.118	0.092	0.091	0.105	0.102	0.093	0.093	0.097	0.097	0.093	0.095	0.092	0.094	0.1	0.112	0.096	0.096	0.133	0.108	0.095	0.092	0.092	0.092	0.094	0.093	0.093	0.108	0.109	0.096	0.093
1:14:22	0.095	0.096	0.1	0.09	0.094	0.107	0.144	0.145	0.096	0.092	0.09	0.09	0.092	0.109	0.09	0.094	0.105	0.103	0.093	0.126	0.092	0.091	0.106	0.103	0.093	0.094	0.096	0.1	0.093	0.095	0.092	0.098	0.101	0.113	0.098	0.096	0.129	0.109	0.095	0.092	0.092	0.092	0.093	0.094	0.093	0.108	0.109	0.096	0.093
1:29:22	0.095	0.096	0.094	0.091	0.119	0.097	0.144	0.146	0.096	0.093	0.091	0.09	0.092	0.11	0.09	0.094	0.105	0.103	0.093	0.117	0.094	0.092	0.106	0.103	0.093	0.094	0.096	0.099	0.093	0.095	0.096	0.099	0.102	0.114	0.1	0.097	0.176	0.11	0.095	0.093	0.092	0.092	0.093	0.094	0.093	0.107	0.109	0.096	0.093
1:44:22	0.095	0.097	0.1	0.091	0.103	0.093	0.145	0.149	0.096	0.093	0.09	0.09	0.092	0.111	0.09	0.094	0.105	0.103	0.093	0.114	0.095	0.093	0.107	0.104	0.093	0.094	0.098	0.099	0.093	0.096	0.094	0.096	0.102	0.116	0.097	0.098	0.141	0.111	0.096	0.093	0.093	0.092	0.094	0.094	0.093	0.107	0.109	0.096	0.093
1:59:22	0.096	0.097	0.102	0.092	0.105	0.095	0.147	0.152	0.097	0.093	0.091	0.091	0.093	0.112	0.091	0.095	0.106	0.107	0.093	0.113	0.096	0.093	0.107	0.105	0.094	0.094	0.098	0.099	0.093	0.096	0.093	0.097	0.102	0.11	0.098	0.098	0.166	0.111	0.096	0.093	0.093	0.092	0.094	0.094	0.093	0.107	0.109	0.097	0.093
2:14:22	0.097	0.098	0.102	0.093	0.102	0.095	0.148	0.156	0.097	0.094	0.091	0.096	0.094	0.112	0.091	0.095	0.107	0.108	0.094	0.126	0.095	0.094	0.108	0.105	0.094	0.095	0.096	0.1	0.094	0.096	0.094	0.097	0.102	0.118	0.099	0.098	0.194	0.111	0.096	0.094	0.093	0.092	0.094	0.094	0.093	0.108	0.109	0.097	0.093
2:29:22	0.097	0.099	0.103	0.095	0.123	0.097	0.15	0.163	0.098	0.095	0.091	0.091	0.094	0.114	0.091	0.096	0.106	0.105	0.093	0.124	0.097	0.093	0.107	0.106	0.094	0.095	0.096	0.1	0.094	0.096	0.094	0.098	0.102	0.114	0.1	0.098	0.148	0.112	0.096	0.094	0.093	0.092	0.094	0.094	0.093	0.108	0.109	0.097	0.093
2:44:22	0.099	0.1	0.106	0.096	0.101	0.099	0.152	0.165	0.099	0.096	0.092	0.092	0.093	0.11	0.092	0.096	0.107	0.103	0.094	0.12	0.097	0.093	0.107	0.107	0.094	0.096	0.096	0.101	0.095	0.096	0.094	0.098	0.102	0.115	0.1	0.098	0.145	0.112	0.096	0.094	0.093	0.092	0.094	0.094	0.093	0.108	0.109	0.098	0.093
2:59:22	0.102	0.102	0.103	0.098	0.103	0.1	0.151	0.165	0.101	0.097	0.093	0.092	0.095	0.112	0.093	0.097	0.107	0.103	0.095	0.128	0.099	0.093	0.104	0.102	0.095	0.096	0.095	0.101	0.094	0.097	0.094	0.098	0.103	0.115	0.1	0.099	0.147	0.113	0.097	0.094	0.094	0.092	0.095	0.094	0.094	0.108	0.11	0.098	0.094
3:14:22	0.104	0.103	0.129	0.101	0.106	0.106	0.178	0.147	0.103	0.099	0.093	0.093	0.095	0.115	0.094	0.098	0.106	0.103	0.095	0.145	0.099	0.093	0.109	0.103	0.095	0.096	0.096	0.101	0.094	0.097	0.095	0.098	0.104	0.109	0.1	0.1	0.14	0.113	0.097	0.095	0.094	0.093	0.096	0.095	0.094	0.109	0.11	0.098	0.094
3:29:22	0.108	0.106	0.131	0.105	0.109	0.122	0.143	0.159	0.104	0.101	0.092	0.093	0.095	0.113	0.094	0.099	0.108	0.099	0.095	0.129	0.1	0.094	0.109	0.107	0.096	0.097	0.099	0.102	0.095	0.097	0.095	0.098	0.104	0.114	0.101	0.1	0.13	0.115	0.097	0.095	0.094	0.093	0.096	0.095	0.094	0.109	0.11	0.099	0.094
3:44:22	0.11	0.109	0.11	0.108	0.123	0.165	0.161	0.123	0.106	0.103	0.093	0.093	0.096	0.109	0.095	0.099	0.108	0.1	0.095	0.125	0.095	0.094	0.108	0.105	0.096	0.097	0.099	0.102	0.095	0.097	0.095	0.098	0.105	0.116	0.101	0.101	0.121	0.116	0.098	0.095	0.093	0.093	0.095	0.095	0.094	0.109	0.11	0.099	0.094
3:59:22	0.112	0.111	0.115	0.113	0.139	0.114	0.166	0.146	0.108	0.105	0.094	0.094	0.096	0.116	0.095	0.1	0.108	0.101	0.096	0.121	0.095	0.094	0.107	0.106	0.096	0.098	0.098	0.103	0.095	0.098	0.096	0.099	0.106	0.111	0.102	0.102	0.105	0.117	0.098	0.095	0.094	0.093	0.095	0.095	0.095	0.109	0.111	0.1	0.094
4:14:22	0.116	0.114	0.121	0.118	0.142	0.118	0.153	0.188	0.111	0.106	0.094	0.095	0.097	0.116	0.098	0.102	0.109	0.102	0.096	0.12	0.095	0.094	0.109	0.104	0.097	0.099	0.097	0.104	0.096	0.098	0.096	0.099	0.107	0.111	0.103	0.103	0.106	0.119	0.099	0.096	0.095	0.095	0.096	0.096	0.095	0.11	0.111	0.1	0.095
4:29:22	0.121	0.118	0.128	0.126	0.121	0.122	0.142	0.191	0.114	0.109	0.094	0.095	0.098	0.104	0.098	0.103	0.109	0.103	0.096	0.096	0.095	0.095	0.111	0.105	0.097	0.1	0.096	0.105	0.096	0.098	0.097	0.099	0.109	0.113	0.105	0.105	0.106	0.12	0.099	0.097	0.094	0.094	0.096	0.096	0.096	0.11	0.111	0.101	0.095
4:44:22	0.128	0.125	0.137	0.136	0.125	0.127	0.159	0.2	0.117	0.112	0.094	0.095	0.099	0.103	0.1	0.105	0.109	0.105	0.096	0.096	0.096	0.095	0.102	0.105	0.098	0.1	0.097	0.106	0.096	0.098	0.097	0.1	0.11	0.114	0.106	0.107	0.106	0.123	0.099	0.097	0.095	0.094	0.097	0.096	0.096	0.112	0.111	0.101	0.096
4:59:22	0.137	0.132	0.149	0.147	0.132	0.134	0.158	0.203	0.122	0.116	0.094	0.095	0.1	0.1	0.101	0.107	0.109	0.106	0.097	0.096	0.096	0.095	0.102	0.106	0.098	0.101	0.097	0.108	0.096	0.099	0.098	0.101	0.111	0.115	0.108	0.108	0.107	0.125	0.099	0.097	0.095	0.094	0.097	0.097	0.096	0.111	0.111	0.102	0.095
5:14:22	0.148	0.142	0.164	0.162	0.14	0.142	0.162	0.205	0.128	0.121	0.095	0.096	0.101	0.102	0.104	0.109	0.11	0.108	0.097	0.097	0.097	0.095	0.103	0.107	0.1	0.102	0.097	0.109	0.097	0.099	0.1	0.102	0.114	0.116	0.11	0.111	0.108	0.129	0.1	0.098	0.095	0.095	0.098	0.097	0.097	0.112	0.112	0.103	0.096
5:29:22	0.162	0.154	0.183	0.18	0.149	0.151	0.168	0.215	0.136	0.128	0.095	0.096	0.102	0.103	0.107	0.112	0.11	0.11	0.098	0.097	0.097	0.095	0.104	0.108	0.1	0.103	0.097	0.111	0.097	0.099	0.1	0.103	0.116	0.118	0.112	0.113	0.109	0.132	0.101	0.099	0.096	0.095	0.098	0.097	0.098	0.113	0.112	0.104	0.096
5:44:22	0.178	0.17	0.205	0.202	0.157	0.161	0.178	0.238	0.145	0.136	0.096	0.096	0.104	0.105	0.109	0.116	0.111	0.113	0.098	0.097	0.098	0.096	0.105	0.109	0.101	0.105	0.098	0.112	0.097	0.099	0.102	0.105	0.119	0.12	0.114	0.116	0.11	0.135	0.101	0.099	0.097	0.095	0.099	0.098	0.099	0.114	0.112	0.105	0.097
5:59:22	0.199	0.189	0.217	0.218	0.168	0.17	0.189	0.282	0.155	0.145	0.096	0.097	0.105	0.106	0.113	0.119	0.112	0.115	0.098	0.098	0.098	0.096	0.107	0.111	0.102	0.107	0.099	0.114	0.097	0.099	0.103	0.106	0.122	0.123	0.118	0.12	0.112	0.139	0.102	0.1	0.097	0.096	0.1	0.099	0.1	0.115	0.113	0.106	0.097
6:14:22	0.223	0.212	0.223	0.226	0.193	0.191	0.204	0.31	0.168	0.156	0.097	0.097	0.107	0.108	0.116	0.123	0.112	0.117	0.098	0.098	0.099	0.096	0.108	0.112	0.104	0.108	0.099	0.116	0.098	0.1	0.105	0.108	0.126	0.126	0.12	0.123	0.114	0.143	0.104	0.101	0.098	0.097	0.101	0.099	0.101	0.117	0.113	0.107	0.097
6:29:22	0.251	0.24	0.233	0.234	0.214	0.213	0.229	0.322	0.197	0.169	0.097	0.097	0.11	0.111	0.12	0.128	0.113	0.121	0.099	0.098	0.1	0.096	0.11	0.114	0.106	0.111	0.1	0.117	0.098	0.1	0.107	0.11	0.13	0.13	0.124	0.126	0.116	0.147	0.105	0.103	0.098	0.098	0.102	0.1	0.102	0.118	0.114	0.109	0.098
6:44:22	0.283	0.273	0.246	0.246	0.226	0.227	0.277	0.331	0.239	0.204	0.098	0.098	0.113	0.113	0.124	0.132	0.114	0.125	0.101	0.1	0.101	0.097	0.112	0.116	0.108	0.113	0.1	0.12	0.099	0.101	0.11	0.113	0.136	0.133	0.126	0.13	0.118	0.152	0.106	0.104	0.099	0.098	0.103	0.102	0.104	0.12	0.114	0.111	0.098
6:59:22	0.32	0.308	0.259	0.259	0.235	0.237	0.299	0.337	0.252	0.239	0.098	0.099	0.115	0.116	0.128	0.137	0.116	0.128	0.101	0.1	0.102	0.097	0.115	0.119	0.11	0.116	0.101	0.123	0.099	0.101	0.113	0.116	0.141	0.138	0.129	0.133	0.121	0.158	0.108	0.106	0.099	0.098	0.104	0.103	0.106	0.122	0.115	0.113	0.098
7:14:22	0.357	0.345	0.268	0.27	0.24	0.244	0.312	0.34	0.258	0.251	0.099	0.1	0.119	0.12	0.132	0.142	0.117	0.133	0.102	0.101	0.103	0.097	0.117	0.122	0.112	0.119	0.101	0.126	0.1	0.102	0.115	0.119	0.147	0.142	0.132	0.138	0.124	0.163	0.11	0.108	0.099	0.099	0.106	0.104	0.107	0.123	0.115	0.115	0.099
7:29:22	0.398	0.386	0.28	0.28	0.245	0.249	0.321	0.344	0.262	0.256	0.101	0.101	0.123	0.124	0.137	0.152	0.118	0.138	0.103	0.102	0.105	0.098	0.121	0.125	0.116	0.121	0.103	0.131	0.101	0.103	0.119	0.123	0.154	0.148	0.135	0.15	0.127	0.172	0.112	0.11	0.101	0.1	0.107	0.106	0.11	0.126	0.116	0.117	0.1
7:44:22	0.444	0.43	0.294	0.293	0.248	0.254	0.329	0.345	0.265	0.259	0.103	0.103	0.129	0.128	0.145	0.164	0.12	0.143	0.105	0.103	0.106	0.099	0.125	0.129	0.118	0.124	0.104	0.136	0.102	0.104	0.123	0.127	0.162	0.154	0.136	0.16	0.13	0.191	0.114	0.113	0.102	0.101	0.109	0.107	0.113	0.129	0.117	0.12	0.1
7:59:22	0.5	0.477	0.304	0.305	0.25	0.257	0.334	0.345	0.266	0.262	0.104	0.105	0.133	0.134	0.158	0.169	0.122	0.149	0.106	0.104	0.108	0.1	0.129	0.133	0.12	0.126	0.105	0.149	0.103	0.105	0.127	0.132	0.168	0.16	0.136	0.165	0.133	0.217	0.117	0.116	0.103	0.102	0.112	0.109	0.116	0.132	0.118	0.123	0.101
8:14:22	0.564	0.529	0.313	0.316	0.254	0.26	0.343	0.348	0.269	0.264	0.106	0.107	0.14	0.14	0.164	0.172	0.124	0.164	0.108	0.106	0.111	0.101	0.133	0.138	0.123	0.128	0.107	0.172	0.105	0.107	0.132	0.137	0.172	0.167	0.137	0.169	0.137	0.234	0.12	0.119	0.105	0.104	0.114	0.111	0.12	0.135	0.119	0.127	0.102
8:29:22	0.63	0.582	0.318	0.321	0.256	0.262	0.347	0.347	0.27	0.266	0.109	0.109	0.148	0.147	0.166	0.173	0.126	0.189	0.111	0.109	0.113	0.102	0.138	0.142	0.125	0.129	0.108	0.189	0.107	0.108	0.138	0.142	0.175	0.171	0.136	0.172	0.142	0.243	0.123	0.122	0.106	0.106	0.117	0.114	0.124	0.138	0.121	0.13	0.102
8:44:22	0.73	0.633	0.322	0.325	0.257	0.264	0.349	0.347	0.271	0.265	0.111	0.111	0.153	0.154	0.168	0.175	0.128	0.208	0.113	0.11	0.116	0.103	0.143	0.148	0.127	0.131	0.109	0.197	0.108	0.11	0.144	0.148	0.179	0.172	0.136	0.175	0.146	0.248	0.126	0.125	0.109	0.108	0.12	0.116	0.126	0.139	0.122	0.134	0.103
8:59:22	0.774	0.678	0.325	0.33	0.258	0.264	0.352	0.346	0.271	0.267	0.114	0.115	0.156	0.158	0.17	0.177	0.131	0.217	0.116	0.112	0.119	0.105	0.149	0.154	0.129	0.134	0.111	0.202	0.111	0.112	0.15	0.156	0.185	0.176	0.136	0.177	0.152	0.252	0.131	0.13	0.11	0.11	0.123	0.119	0.128	0.14	0.124	0.139	0.105
9:14:22	0.823	0.721	0.328	0.332	0.258	0.263	0.352	0.344	0.271	0.268	0.117	0.117	0.16	0.16	0.172	0.178	0.135	0.223	0.118	0.115	0.122	0.106	0.154	0.158	0.13	0.138	0.113	0.204	0.113	0.114	0.157	0.163	0.189	0.182	0.136	0.179	0.157	0.256	0.144	0.146	0.113	0.112	0.126	0.122	0.129	0.141	0.126	0.142	0.106
9:29:22	0.997	0.763	0.33	0.335	0.258	0.264	0.352	0.343	0.27	0.269	0.12	0.121	0.165	0.165	0.173	0.179	0.138	0.227	0.121	0.117	0.126	0.108	0.157	0.161	0.133	0.141	0.115	0.206	0.115	0.116	0.165	0.171	0.193	0.186	0.136	0.18	0.163	0.259	0.169	0.172	0.115	0.115	0.129	0.125	0.129	0.141	0.127	0.145	0.108
9:44:22	1.059	0.805	0.332	0.337	0.258	0.263	0.351	0.342	0.271	0.268	0.125	0.126	0.171	0.171	0.175	0.18	0.143	0.23	0.124	0.12	0.13	0.11	0.159	0.164	0.136	0.145	0.117	0.207	0.118	0.118	0.174	0.18	0.196	0.19	0.137	0.181	0.171	0.26	0.184	0.184	0.118	0.118	0.133	0.129	0.129	0.141	0.13	0.149	0.109
9:59:22	1.278	0.844	0.332	0.338	0.257	0.262	0.35	0.342	0.27	0.268	0.129	0.13	0.177	0.177	0.175	0.181	0.148	0.232	0.127	0.122	0.134	0.112	0.164	0.169	0.139	0.147	0.12	0.207	0.12	0.121	0.183	0.189	0.2	0.193	0.138	0.182	0.188	0.261	0.19	0.19	0.122	0.12	0.137	0.132	0.129	0.141	0.131	0.152	0.111
10:14:22	1.331	0.883	0.332	0.34	0.255	0.261	0.348	0.342	0.268	0.267	0.134	0.135	0.183	0.183	0.176	0.181	0.152	0.232	0.129	0.124	0.139	0.115	0.169	0.173	0.143	0.149	0.124	0.208	0.127	0.124	0.192	0.198	0.202	0.196	0.139	0.183	0.213	0.261	0.194	0.193	0.125	0.124	0.142	0.136	0.129	0.141	0.134	0.155	0.114
10:29:22	1.437	0.919	0.329	0.339	0.253	0.259	0.346	0.341	0.265	0.265	0.14	0.141	0.187	0.187	0.177	0.182	0.157	0.233	0.132	0.127	0.144	0.117	0.173	0.178	0.146	0.151	0.127	0.208	0.141	0.131	0.202	0.208	0.205	0.199	0.14	0.183	0.23	0.261	0.196	0.195	0.128	0.127	0.146	0.14	0.129	0.141	0.137	0.157	0.116
10:44:22	1.405	0.953	0.328	0.339	0.253	0.258	0.347	0.342	0.265	0.263	0.146	0.147	0.19	0.191	0.177	0.182	0.162	0.233	0.137	0.131	0.149	0.12	0.177	0.182	0.148	0.153	0.131	0.208	0.16	0.146	0.212	0.22	0.207	0.202	0.141	0.184	0.239	0.26	0.197	0.196	0.132	0.132	0.15	0.144	0.128	0.141	0.141	0.16	0.12
10:59:22	1.34	0.983	0.329	0.339	0.251	0.258	0.348	0.343	0.263	0.263	0.153	0.155	0.195	0.195	0.179	0.183	0.168	0.231	0.145	0.136	0.155	0.123	0.181	0.189	0.151	0.155	0.135	0.208	0.171	0.163	0.224	0.231	0.209	0.205	0.143	0.185	0.246	0.258	0.198	0.197	0.137	0.136	0.154	0.15	0.129	0.142	0.145	0.161	0.127
11:14:22	1.398	1.009	0.326	0.338	0.249	0.255	0.346	0.341	0.261	0.261	0.161	0.162	0.198	0.2	0.178	0.182	0.173	0.229	0.157	0.143	0.161	0.127	0.186	0.194	0.152	0.155	0.139	0.206	0.177	0.173	0.235	0.244	0.211	0.206	0.145	0.184	0.251	0.256	0.198	0.197	0.142	0.14	0.157	0.152	0.129	0.141	0.149	0.163	0.142
11:29:22	1.351	1.03	0.324	0.337	0.247	0.252	0.343	0.342	0.259	0.259	0.168	0.17	0.203	0.204	0.179	0.181	0.179	0.226	0.169	0.154	0.167	0.13	0.191	0.201	0.154	0.156	0.144	0.205	0.18	0.178	0.248	0.256	0.213	0.209	0.146	0.185	0.254	0.253	0.199	0.197	0.146	0.146	0.162	0.156	0.129	0.142	0.152	0.164	0.162
11:44:22	1.364	1.052	0.323	0.336	0.249	0.25	0.344	0.339	0.257	0.257	0.178	0.179	0.207	0.208	0.179	0.181	0.188	0.224	0.178	0.165	0.175	0.135	0.198	0.208	0.155	0.157	0.155	0.204	0.182	0.182	0.261	0.269	0.215	0.211	0.148	0.185	0.257	0.252	0.199	0.198	0.153	0.152	0.166	0.16	0.129	0.142	0.155	0.166	0.173
11:59:22	1.373	1.068	0.321	0.336	0.245	0.247	0.343	0.337	0.254	0.255	0.188	0.19	0.21	0.212	0.179	0.179	0.198	0.221	0.185	0.174	0.183	0.14	0.203	0.215	0.157	0.158	0.172	0.204	0.184	0.184	0.275	0.284	0.217	0.214	0.15	0.185	0.259	0.25	0.199	0.198	0.158	0.158	0.169	0.165	0.131	0.143	0.159	0.168	0.177
12:14:22	1.334	1.083	0.32	0.333	0.244	0.244	0.344	0.334	0.252	0.252	0.197	0.2	0.213	0.214	0.179	0.178	0.207	0.219	0.189	0.179	0.191	0.144	0.209	0.22	0.157	0.159	0.184	0.202	0.184	0.185	0.288	0.298	0.218	0.215	0.15	0.185	0.26	0.248	0.198	0.197	0.165	0.165	0.171	0.167	0.131	0.144	0.161	0.17	0.179
12:29:22	1.367	1.093	0.319	0.332	0.242	0.242	0.344	0.332	0.25	0.249	0.208	0.211	0.215	0.217	0.179	0.177	0.215	0.218	0.192	0.184	0.201	0.149	0.213	0.224	0.159	0.16	0.192	0.201	0.185	0.185	0.303	0.313	0.22	0.217	0.152	0.185	0.26	0.248	0.198	0.196	0.173	0.172	0.173	0.169	0.132	0.144	0.165	0.171	0.179
12:44:22	1.311	1.1	0.318	0.332	0.24	0.239	0.342	0.327	0.248	0.249	0.221	0.224	0.218	0.22	0.179	0.177	0.223	0.215	0.196	0.187	0.211	0.155	0.217	0.228	0.16	0.16	0.197	0.201	0.185	0.186	0.319	0.33	0.222	0.219	0.153	0.185	0.26	0.247	0.197	0.195	0.18	0.179	0.176	0.172	0.132	0.145	0.167	0.173	0.18
12:59:22	1.33	1.106	0.318	0.332	0.237	0.238	0.339	0.322	0.247	0.247	0.232	0.235	0.221	0.222	0.179	0.177	0.23	0.215	0.197	0.19	0.222	0.161	0.221	0.232	0.161	0.161	0.201	0.198	0.186	0.187	0.337	0.347	0.224	0.221	0.154	0.185	0.26	0.246	0.196	0.194	0.187	0.186	0.177	0.173	0.133	0.146	0.17	0.176	0.178
13:14:22	1.352	1.108	0.316	0.329	0.234	0.234	0.336	0.318	0.245	0.244	0.245	0.247	0.223	0.224	0.177	0.175	0.235	0.212	0.199	0.193	0.234	0.167	0.224	0.235	0.162	0.162	0.203	0.195	0.185	0.187	0.354	0.365	0.225	0.222	0.155	0.184	0.258	0.244	0.195	0.193	0.196	0.193	0.178	0.175	0.133	0.146	0.171	0.178	0.178
13:29:22	1.345	1.114	0.315	0.329	0.234	0.233	0.335	0.315	0.243	0.242	0.259	0.26	0.225	0.226	0.177	0.175	0.241	0.212	0.2	0.195	0.247	0.174	0.228	0.238	0.163	0.162	0.205	0.194	0.185	0.187	0.372	0.383	0.225	0.223	0.156	0.184	0.256	0.243	0.193	0.192	0.203	0.201	0.18	0.177	0.134	0.148	0.173	0.18	0.176
13:44:22	1.344	1.116	0.314	0.329	0.232	0.23	0.332	0.311	0.241	0.242	0.272	0.274	0.226	0.228	0.177	0.175	0.246	0.21	0.2	0.196	0.26	0.18	0.231	0.241	0.164	0.162	0.206	0.191	0.186	0.187	0.391	0.402	0.226	0.224	0.157	0.184	0.256	0.242	0.193	0.191	0.211	0.208	0.181	0.178	0.135	0.148	0.174	0.182	0.176
13:59:22	1.343	1.118	0.313	0.328	0.23	0.229	0.329	0.308	0.241	0.239	0.286	0.292	0.227	0.23	0.176	0.175	0.25	0.21	0.2	0.196	0.275	0.188	0.233	0.244	0.165	0.163	0.205	0.19	0.185	0.187	0.41	0.421	0.228	0.226	0.157	0.183	0.255	0.242	0.192	0.19	0.218	0.216	0.182	0.179	0.136	0.149	0.175	0.185	0.176
14:14:22	1.345	1.118	0.313	0.326	0.229	0.227	0.326	0.304	0.238	0.237	0.302	0.306	0.228	0.232	0.176	0.174	0.254	0.209	0.2	0.198	0.291	0.194	0.236	0.246	0.165	0.164	0.205	0.187	0.185	0.187	0.429	0.441	0.228	0.227	0.158	0.183	0.254	0.239	0.19	0.188	0.226	0.224	0.183	0.181	0.136	0.15	0.175	0.186	0.173
14:29:22	1.206	1.12	0.311	0.325	0.229	0.226	0.324	0.299	0.237	0.236	0.318	0.323	0.229	0.233	0.176	0.173	0.257	0.208	0.2	0.198	0.307	0.202	0.237	0.248	0.166	0.164	0.204	0.186	0.185	0.187	0.449	0.461	0.228	0.227	0.159	0.182	0.254	0.238	0.189	0.187	0.235	0.232	0.184	0.182	0.137	0.151	0.178	0.188	0.175
14:44:22	1.177	1.123	0.311	0.324	0.227	0.224	0.322	0.297	0.236	0.234	0.336	0.342	0.23	0.234	0.178	0.173	0.26	0.208	0.2	0.198	0.323	0.21	0.239	0.249	0.167	0.165	0.204	0.183	0.184	0.186	0.469	0.482	0.229	0.228	0.159	0.181	0.252	0.236	0.188	0.186	0.244	0.24	0.185	0.183	0.138	0.151	0.179	0.19	0.171
14:59:22	1.145	1.123	0.309	0.323	0.225	0.223	0.32	0.294	0.234	0.232	0.355	0.36	0.231	0.234	0.175	0.172	0.262	0.207	0.2	0.198	0.339	0.218	0.239	0.25	0.167	0.164	0.202	0.181	0.183	0.186	0.489	0.502	0.228	0.228	0.16	0.18	0.251	0.235	0.187	0.185	0.251	0.249	0.186	0.183	0.138	0.151	0.181	0.192	0.17
15:14:22	1.228	1.123	0.308	0.321	0.225	0.223	0.319	0.291	0.232	0.23	0.374	0.38	0.231	0.234	0.175	0.173	0.265	0.205	0.199	0.198	0.355	0.228	0.24	0.251	0.167	0.165	0.202	0.179	0.182	0.185	0.511	0.524	0.229	0.229	0.161	0.179	0.251	0.233	0.185	0.183	0.262	0.257	0.186	0.185	0.139	0.152	0.184	0.192	0.175
15:29:22	1.224	1.123	0.308	0.32	0.224	0.221	0.319	0.288	0.231	0.23	0.393	0.399	0.231	0.234	0.175	0.173	0.266	0.205	0.2	0.199	0.372	0.237	0.241	0.251	0.168	0.165	0.2	0.178	0.181	0.184	0.531	0.545	0.228	0.229	0.161	0.178	0.249	0.232	0.184	0.182	0.271	0.266	0.187	0.185	0.139	0.153	0.185	0.195	0.175
15:44:22	1.229	1.124	0.307	0.32	0.224	0.221	0.318	0.286	0.23	0.227	0.413	0.419	0.232	0.236	0.174	0.173	0.269	0.204	0.199	0.199	0.388	0.248	0.242	0.252	0.168	0.166	0.199	0.176	0.181	0.183	0.553	0.565	0.228	0.23	0.162	0.178	0.25	0.231	0.184	0.18	0.282	0.276	0.186	0.186	0.14	0.154	0.188	0.195	0.167
15:59:22	1.234	1.123	0.306	0.318	0.223	0.22	0.319	0.285	0.228	0.227	0.433	0.439	0.233	0.236	0.175	0.172	0.27	0.204	0.199	0.199	0.406	0.258	0.242	0.252	0.169	0.166	0.199	0.175	0.18	0.183	0.572	0.585	0.228	0.229	0.163	0.177	0.248	0.23	0.183	0.18	0.291	0.285	0.186	0.186	0.14	0.154	0.19	0.197	0.165
16:14:22	1.22	1.122	0.307	0.317	0.222	0.219	0.318	0.282	0.227	0.224	0.452	0.46	0.232	0.236	0.173	0.172	0.272	0.203	0.198	0.198	0.423	0.269	0.241	0.252	0.169	0.166	0.198	0.173	0.178	0.182	0.591	0.605	0.227	0.228	0.163	0.176	0.246	0.229	0.181	0.178	0.299	0.295	0.185	0.186	0.14	0.154	0.193	0.198	0.165
16:29:22	1.194	1.123	0.307	0.316	0.221	0.218	0.321	0.281	0.227	0.224	0.472	0.48	0.232	0.236	0.173	0.171	0.273	0.202	0.197	0.198	0.44	0.281	0.241	0.252	0.169	0.166	0.197	0.171	0.178	0.181	0.61	0.621	0.227	0.228	0.164	0.175	0.245	0.228	0.18	0.177	0.311	0.305	0.184	0.184	0.141	0.154	0.195	0.198	0.165
16:44:22	1.178	1.125	0.306	0.315	0.221	0.218	0.322	0.278	0.225	0.222	0.493	0.5	0.232	0.235	0.174	0.171	0.275	0.201	0.198	0.198	0.458	0.294	0.24	0.252	0.17	0.167	0.196	0.17	0.177	0.179	0.628	0.64	0.226	0.228	0.164	0.175	0.244	0.228	0.179	0.176	0.322	0.316	0.182	0.183	0.141	0.155	0.197	0.199	0.163
16:59:22	1.178	1.123	0.304	0.314	0.22	0.217	0.32	0.279	0.223	0.22	0.514	0.52	0.231	0.235	0.173	0.17	0.276	0.2	0.196	0.197	0.475	0.308	0.241	0.251	0.17	0.167	0.196	0.169	0.175	0.178	0.644	0.656	0.226	0.227	0.165	0.174	0.243	0.227	0.178	0.175	0.331	0.327	0.181	0.181	0.141	0.155	0.197	0.2	0.179
17:14:22	1.188	1.123	0.303	0.313	0.22	0.217	0.321	0.278	0.223	0.22	0.533	0.54	0.23	0.234	0.173	0.17	0.279	0.199	0.196	0.197	0.494	0.322	0.239	0.251	0.17	0.167	0.195	0.167	0.175	0.177	0.66	0.671	0.226	0.227	0.166	0.173	0.242	0.227	0.177	0.174	0.343	0.338	0.18	0.18	0.141	0.154	0.201	0.2	0.16
17:29:22	1.203	1.123	0.302	0.312	0.219	0.216	0.319	0.276	0.222	0.219	0.551	0.559	0.23	0.234	0.173	0.17	0.279	0.198	0.196	0.196	0.51	0.336	0.239	0.251	0.171	0.167	0.195	0.166	0.174	0.176	0.674	0.686	0.226	0.227	0.166	0.172	0.24	0.226	0.176	0.173	0.356	0.348	0.178	0.179	0.141	0.155	0.202	0.202	0.158
17:44:22	1.222	1.12	0.3	0.31	0.218	0.215	0.318	0.276	0.22	0.217	0.572	0.58	0.229	0.233	0.172	0.169	0.281	0.198	0.195	0.195	0.526	0.35	0.238	0.25	0.171	0.167	0.194	0.164	0.172	0.175	0.69	0.7	0.225	0.226	0.166	0.171	0.239	0.225	0.175	0.171	0.367	0.357	0.176	0.177	0.141	0.154	0.203	0.202	0.157
17:59:22	1.234	1.121	0.299	0.309	0.218	0.215	0.318	0.274	0.219	0.216	0.589	0.597	0.228	0.232	0.172	0.169	0.282	0.197	0.195	0.195	0.544	0.365	0.238	0.25	0.171	0.167	0.193	0.163	0.171	0.173	0.702	0.713	0.224	0.226	0.167	0.17	0.238	0.225	0.174	0.171	0.378	0.37	0.176	0.177	0.141	0.154	0.204	0.202	0.181
18:14:22	1.239	1.119	0.298	0.308	0.217	0.214	0.316	0.273	0.218	0.215	0.607	0.614	0.228	0.232	0.172	0.169	0.284	0.197	0.194	0.195	0.561	0.379	0.238	0.248	0.171	0.168	0.193	0.162	0.17	0.172	0.714	0.725	0.223	0.225	0.167	0.17	0.237	0.224	0.173	0.17	0.389	0.382	0.176	0.175	0.141	0.154	0.205	0.202	0.155
18:29:22	1.245	1.118	0.296	0.306	0.218	0.213	0.314	0.273	0.217	0.214	0.622	0.63	0.228	0.231	0.172	0.168	0.287	0.195	0.194	0.195	0.577	0.395	0.237	0.248	0.171	0.168	0.193	0.16	0.169	0.172	0.726	0.736	0.223	0.225	0.168	0.169	0.235	0.224	0.172	0.169	0.399	0.392	0.175	0.175	0.141	0.154	0.205	0.201	0.155
18:44:22	1.244	1.121	0.295	0.306	0.217	0.213	0.314	0.271	0.217	0.213	0.638	0.644	0.227	0.23	0.172	0.168	0.289	0.194	0.193	0.193	0.592	0.411	0.236	0.248	0.171	0.168	0.192	0.159	0.168	0.17	0.737	0.748	0.222	0.225	0.168	0.168	0.235	0.222	0.171	0.168	0.411	0.402	0.174	0.174	0.141	0.154	0.207	0.202	0.162
18:59:22	1.238	1.121	0.293	0.305	0.217	0.214	0.315	0.274	0.216	0.212	0.651	0.659	0.227	0.23	0.171	0.167	0.29	0.194	0.193	0.193	0.605	0.427	0.236	0.247	0.172	0.168	0.191	0.159	0.167	0.17	0.748	0.758	0.221	0.224	0.169	0.168	0.235	0.221	0.171	0.167	0.421	0.412	0.174	0.174	0.141	0.154	0.208	0.203	0.153
19:14:22	1.199	1.119	0.292	0.303	0.215	0.212	0.313	0.276	0.216	0.211	0.665	0.672	0.227	0.23	0.172	0.167	0.292	0.193	0.193	0.194	0.62	0.444	0.235	0.246	0.172	0.169	0.191	0.158	0.167	0.169	0.757	0.767	0.221	0.223	0.169	0.167	0.233	0.221	0.169	0.166	0.433	0.424	0.174	0.173	0.142	0.154	0.208	0.203	0.152
19:29:22	1.22	1.118	0.291	0.303	0.215	0.211	0.313	0.276	0.214	0.211	0.677	0.685	0.227	0.229	0.171	0.167	0.293	0.192	0.191	0.193	0.633	0.459	0.235	0.246	0.172	0.169	0.19	0.157	0.165	0.167	0.766	0.775	0.22	0.223	0.169	0.166	0.231	0.219	0.168	0.165	0.444	0.431	0.174	0.173	0.141	0.154	0.209	0.203	0.151
19:44:22	1.201	1.119	0.29	0.301	0.214	0.211	0.316	0.279	0.214	0.209	0.688	0.695	0.226	0.23	0.171	0.167	0.294	0.192	0.191	0.192	0.646	0.476	0.234	0.245	0.173	0.169	0.19	0.156	0.164	0.166	0.775	0.783	0.219	0.222	0.169	0.166	0.23	0.218	0.167	0.164	0.451	0.44	0.173	0.173	0.142	0.154	0.21	0.203	0.15
19:59:22	1.205	1.115	0.289	0.3	0.214	0.21	0.318	0.284	0.212	0.208	0.697	0.705	0.225	0.229	0.171	0.167	0.296	0.191	0.191	0.193	0.659	0.492	0.234	0.244	0.172	0.17	0.189	0.156	0.163	0.166	0.782	0.79	0.219	0.221	0.169	0.165	0.229	0.217	0.167	0.163	0.463	0.45	0.174	0.173	0.142	0.154	0.21	0.203	0.149
20:14:22	1.17	1.117	0.288	0.299	0.214	0.21	0.325	0.287	0.213	0.208	0.707	0.714	0.225	0.228	0.172	0.166	0.298	0.19	0.191	0.192	0.671	0.507	0.233	0.243	0.173	0.17	0.189	0.156	0.162	0.164	0.789	0.797	0.218	0.221	0.169	0.164	0.228	0.216	0.165	0.162	0.471	0.46	0.173	0.173	0.143	0.154	0.211	0.203	0.148
20:29:22	1.178	1.112	0.287	0.299	0.213	0.21	0.328	0.29	0.211	0.205	0.715	0.723	0.224	0.228	0.17	0.165	0.298	0.189	0.19	0.191	0.681	0.524	0.232	0.242	0.172	0.17	0.188	0.155	0.161	0.163	0.796	0.803	0.218	0.22	0.169	0.163	0.227	0.215	0.164	0.161	0.481	0.47	0.174	0.173	0.142	0.154	0.212	0.203	0.147
20:44:22	1.169	1.113	0.287	0.298	0.213	0.211	0.336	0.296	0.212	0.207	0.723	0.731	0.224	0.227	0.17	0.166	0.3	0.188	0.19	0.191	0.693	0.538	0.232	0.242	0.173	0.171	0.187	0.154	0.16	0.163	0.802	0.809	0.218	0.22	0.169	0.163	0.227	0.215	0.164	0.16	0.49	0.478	0.173	0.173	0.143	0.154	0.212	0.204	0.147
20:59:22	1.148	1.11	0.286	0.296	0.211	0.209	0.343	0.304	0.209	0.204	0.732	0.738	0.223	0.227	0.169	0.164	0.3	0.187	0.19	0.191	0.703	0.553	0.231	0.24	0.173	0.171	0.187	0.154	0.159	0.161	0.807	0.815	0.217	0.219	0.169	0.161	0.226	0.215	0.163	0.159	0.497	0.489	0.174	0.173	0.143	0.154	0.213	0.204	0.146
21:14:22	1.135	1.111	0.285	0.296	0.212	0.21	0.35	0.309	0.209	0.204	0.737	0.744	0.223	0.227	0.169	0.165	0.302	0.186	0.189	0.189	0.713	0.566	0.231	0.239	0.173	0.172	0.186	0.153	0.158	0.16	0.813	0.82	0.217	0.219	0.169	0.162	0.226	0.216	0.162	0.158	0.509	0.498	0.174	0.173	0.143	0.154	0.211	0.203	0.145
21:29:22	1.115	1.109	0.284	0.295	0.21	0.208	0.36	0.32	0.209	0.203	0.742	0.752	0.223	0.226	0.169	0.165	0.303	0.186	0.189	0.19	0.722	0.58	0.23	0.239	0.174	0.171	0.186	0.153	0.158	0.16	0.819	0.825	0.216	0.218	0.169	0.161	0.228	0.216	0.161	0.157	0.516	0.504	0.174	0.173	0.143	0.154	0.212	0.205	0.144
21:44:22	1.21	1.109	0.283	0.293	0.211	0.208	0.368	0.33	0.208	0.202	0.746	0.754	0.223	0.226	0.169	0.164	0.304	0.185	0.188	0.189	0.731	0.594	0.229	0.238	0.175	0.172	0.186	0.152	0.156	0.159	0.823	0.83	0.215	0.218	0.169	0.16	0.226	0.217	0.16	0.156	0.523	0.51	0.174	0.173	0.143	0.154	0.214	0.205	0.144
21:59:22	1.206	1.108	0.283	0.293	0.21	0.21	0.38	0.335	0.208	0.202	0.751	0.758	0.223	0.226	0.169	0.164	0.305	0.183	0.188	0.188	0.739	0.605	0.229	0.237	0.175	0.173	0.184	0.151	0.156	0.158	0.828	0.834	0.215	0.218	0.169	0.159	0.226	0.217	0.159	0.155	0.533	0.521	0.174	0.173	0.144	0.154	0.212	0.204	0.143
22:14:22	1.208	1.108	0.281	0.292	0.21	0.207	0.389	0.346	0.206	0.201	0.754	0.761	0.222	0.225	0.168	0.164	0.305	0.182	0.187	0.188	0.746	0.617	0.228	0.237	0.175	0.172	0.184	0.151	0.154	0.157	0.832	0.838	0.215	0.217	0.168	0.158	0.227	0.218	0.159	0.154	0.537	0.526	0.173	0.173	0.143	0.153	0.212	0.204	0.142
22:29:22	1.206	1.107	0.281	0.291	0.209	0.207	0.398	0.353	0.207	0.201	0.752	0.765	0.221	0.225	0.168	0.163	0.307	0.181	0.187	0.188	0.754	0.628	0.227	0.236	0.175	0.172	0.183	0.151	0.153	0.156	0.836	0.842	0.214	0.216	0.169	0.157	0.227	0.219	0.158	0.154	0.548	0.532	0.174	0.173	0.144	0.154	0.213	0.205	0.142
22:44:22	1.206	1.107	0.28	0.29	0.209	0.207	0.406	0.362	0.206	0.2	0.755	0.766	0.221	0.224	0.168	0.163	0.308	0.179	0.187	0.188	0.761	0.639	0.227	0.235	0.175	0.173	0.183	0.15	0.153	0.155	0.84	0.846	0.214	0.215	0.169	0.157	0.227	0.221	0.157	0.153	0.552	0.539	0.173	0.173	0.144	0.154	0.213	0.204	0.141
22:59:22	1.205	1.105	0.278	0.289	0.208	0.206	0.415	0.368	0.205	0.199	0.757	0.768	0.22	0.224	0.167	0.163	0.307	0.178	0.186	0.186	0.767	0.649	0.226	0.234	0.175	0.173	0.182	0.15	0.152	0.154	0.844	0.849	0.212	0.215	0.168	0.156	0.229	0.221	0.156	0.152	0.558	0.544	0.173	0.173	0.144	0.154	0.213	0.205	0.14
23:14:22	1.204	1.105	0.278	0.288	0.208	0.206	0.424	0.377	0.205	0.199	0.758	0.769	0.221	0.224	0.167	0.162	0.309	0.177	0.186	0.186	0.773	0.66	0.226	0.234	0.176	0.174	0.182	0.15	0.151	0.154	0.848	0.853	0.213	0.215	0.169	0.155	0.23	0.224	0.156	0.151	0.566	0.55	0.173	0.173	0.144	0.154	0.213	0.206	0.139
23:29:22	1.186	1.104	0.278	0.288	0.21	0.207	0.433	0.384	0.205	0.198	0.759	0.77	0.22	0.223	0.167	0.163	0.31	0.176	0.185	0.185	0.78	0.669	0.226	0.233	0.176	0.175	0.18	0.149	0.151	0.153	0.852	0.857	0.212	0.215	0.169	0.155	0.232	0.226	0.156	0.151	0.572	0.561	0.174	0.173	0.144	0.155	0.213	0.207	0.139
23:44:22	1.167	1.101	0.276	0.286	0.208	0.205	0.44	0.392	0.204	0.198	0.758	0.772	0.22	0.224	0.167	0.163	0.312	0.175	0.185	0.186	0.785	0.679	0.225	0.232	0.177	0.174	0.18	0.149	0.15	0.152	0.855	0.861	0.212	0.214	0.169	0.155	0.234	0.228	0.155	0.15	0.58	0.565	0.173	0.173	0.144	0.154	0.213	0.206	0.138
23:59:22	1.154	1.099	0.275	0.287	0.207	0.206	0.45	0.4	0.204	0.197	0.762	0.772	0.22	0.223	0.167	0.161	0.311	0.174	0.185	0.185	0.79	0.688	0.224	0.232	0.176	0.174	0.18	0.149	0.15	0.152	0.858	0.866	0.211	0.214	0.168	0.154	0.236	0.23	0.154	0.149	0.584	0.569	0.173	0.173	0.145	0.154	0.214	0.207	0.137
24:14:22	1.154	1.096	0.275	0.285	0.207	0.205	0.458	0.407	0.203	0.197	0.758	0.772	0.219	0.223	0.167	0.162	0.311	0.173	0.185	0.185	0.795	0.696	0.224	0.232	0.178	0.175	0.179	0.149	0.149	0.151	0.862	0.868	0.211	0.213	0.169	0.154	0.238	0.233	0.154	0.149	0.59	0.574	0.173	0.172	0.144	0.155	0.213	0.207	0.137
24:29:22	1.191	1.094	0.275	0.285	0.207	0.205	0.467	0.417	0.203	0.197	0.756	0.772	0.22	0.222	0.166	0.16	0.312	0.172	0.184	0.185	0.8	0.704	0.223	0.231	0.178	0.175	0.178	0.148	0.148	0.151	0.865	0.871	0.21	0.213	0.169	0.153	0.24	0.235	0.153	0.149	0.597	0.58	0.173	0.172	0.144	0.155	0.215	0.209	0.136
24:44:22	1.189	1.09	0.273	0.283	0.206	0.204	0.474	0.425	0.203	0.196	0.759	0.769	0.219	0.222	0.167	0.162	0.313	0.171	0.184	0.185	0.804	0.711	0.223	0.23	0.178	0.176	0.179	0.148	0.148	0.15	0.868	0.874	0.21	0.213	0.168	0.152	0.243	0.238	0.152	0.148	0.603	0.59	0.173	0.172	0.144	0.155	0.215	0.208	0.136
24:59:22	1.171	1.086	0.273	0.283	0.205	0.204	0.483	0.432	0.202	0.195	0.755	0.769	0.219	0.222	0.166	0.161	0.313	0.169	0.184	0.185	0.809	0.718	0.222	0.23	0.178	0.177	0.178	0.147	0.147	0.149	0.871	0.876	0.209	0.212	0.168	0.151	0.245	0.241	0.152	0.147	0.605	0.592	0.173	0.173	0.144	0.155	0.215	0.208	0.135
25:14:22	1.146	1.077	0.273	0.281	0.209	0.205	0.492	0.439	0.201	0.194	0.755	0.766	0.218	0.221	0.165	0.159	0.312	0.168	0.184	0.184	0.813	0.724	0.222	0.229	0.179	0.177	0.176	0.147	0.146	0.149	0.873	0.879	0.209	0.212	0.169	0.151	0.247	0.244	0.151	0.146	0.616	0.603	0.173	0.173	0.144	0.155	0.213	0.209	0.134
25:29:22	1.118	1.063	0.272	0.282	0.205	0.204	0.5	0.446	0.201	0.195	0.751	0.766	0.218	0.221	0.165	0.158	0.314	0.167	0.184	0.184	0.818	0.731	0.221	0.229	0.179	0.177	0.177	0.148	0.146	0.148	0.876	0.882	0.209	0.211	0.169	0.15	0.251	0.247	0.151	0.146	0.62	0.603	0.173	0.172	0.144	0.155	0.215	0.209	0.133
25:44:22	1.09	1.049	0.271	0.282	0.205	0.204	0.507	0.461	0.2	0.194	0.751	0.763	0.218	0.221	0.165	0.158	0.312	0.165	0.184	0.184	0.822	0.737	0.221	0.228	0.18	0.177	0.176	0.147	0.145	0.147	0.879	0.885	0.208	0.21	0.168	0.15	0.255	0.249	0.15	0.145	0.622	0.61	0.173	0.172	0.143	0.155	0.215	0.21	0.132
25:59:22	1.069	1.038	0.271	0.28	0.204	0.204	0.516	0.469	0.2	0.194	0.746	0.763	0.217	0.22	0.165	0.158	0.312	0.164	0.182	0.183	0.826	0.743	0.22	0.227	0.18	0.178	0.175	0.147	0.145	0.147	0.881	0.888	0.208	0.21	0.168	0.149	0.257	0.253	0.15	0.145	0.63	0.613	0.173	0.172	0.143	0.155	0.215	0.211	0.132
26:14:22	1.044	1.03	0.27	0.279	0.205	0.203	0.528	0.48	0.2	0.193	0.746	0.759	0.217	0.22	0.164	0.158	0.313	0.162	0.183	0.183	0.83	0.749	0.22	0.227	0.181	0.178	0.175	0.147	0.144	0.147	0.884	0.89	0.207	0.21	0.168	0.149	0.261	0.256	0.149	0.145	0.633	0.619	0.173	0.172	0.143	0.154	0.215	0.213	0.131
26:29:22	1.013	1.026	0.27	0.279	0.205	0.203	0.535	0.488	0.2	0.193	0.744	0.758	0.217	0.22	0.164	0.156	0.313	0.161	0.182	0.183	0.833	0.753	0.219	0.226	0.182	0.178	0.174	0.147	0.144	0.146	0.886	0.894	0.207	0.209	0.168	0.148	0.264	0.26	0.148	0.144	0.642	0.621	0.172	0.172	0.143	0.155	0.215	0.212	0.131
26:44:22	0.986	1.022	0.27	0.28	0.204	0.203	0.542	0.494	0.2	0.193	0.74	0.756	0.217	0.22	0.164	0.156	0.313	0.161	0.183	0.196	0.837	0.758	0.219	0.226	0.181	0.179	0.175	0.146	0.144	0.146	0.889	0.896	0.206	0.209	0.169	0.147	0.268	0.262	0.148	0.143	0.643	0.627	0.172	0.172	0.143	0.155	0.216	0.212	0.13
26:59:22	0.955	1.025	0.268	0.278	0.204	0.204	0.55	0.503	0.199	0.192	0.734	0.753	0.216	0.22	0.164	0.157	0.312	0.159	0.181	0.183	0.84	0.763	0.218	0.226	0.181	0.179	0.174	0.145	0.143	0.145	0.891	0.898	0.206	0.209	0.168	0.147	0.271	0.266	0.147	0.143	0.649	0.632	0.172	0.173	0.143	0.154	0.216	0.214	0.13
27:14:22	0.922	1.032	0.267	0.278	0.203	0.202	0.556	0.508	0.201	0.193	0.732	0.753	0.216	0.22	0.164	0.154	0.314	0.159	0.182	0.184	0.844	0.767	0.218	0.225	0.183	0.179	0.175	0.146	0.143	0.145	0.894	0.903	0.205	0.208	0.168	0.146	0.275	0.27	0.147	0.143	0.65	0.63	0.172	0.171	0.143	0.154	0.217	0.212	0.129
27:29:22	0.886	1.037	0.267	0.277	0.203	0.202	0.564	0.514	0.199	0.192	0.731	0.748	0.216	0.219	0.163	0.154	0.314	0.157	0.181	0.182	0.847	0.772	0.217	0.224	0.182	0.179	0.173	0.145	0.142	0.144	0.896	0.903	0.205	0.208	0.168	0.145	0.277	0.272	0.146	0.142	0.649	0.635	0.171	0.171	0.143	0.154	0.217	0.213	0.128
27:44:22	0.848	1.038	0.267	0.278	0.203	0.201	0.57	0.52	0.199	0.193	0.731	0.747	0.217	0.219	0.164	0.154	0.314	0.155	0.181	0.182	0.85	0.776	0.216	0.224	0.183	0.18	0.173	0.144	0.141	0.144	0.898	0.907	0.205	0.208	0.168	0.145	0.281	0.276	0.146	0.141	0.655	0.637	0.171	0.171	0.142	0.154	0.218	0.215	0.127
27:59:22	0.809	1.017	0.266	0.276	0.202	0.201	0.577	0.526	0.199	0.192	0.732	0.745	0.215	0.218	0.163	0.154	0.312	0.155	0.181	0.181	0.853	0.78	0.215	0.224	0.185	0.181	0.172	0.144	0.141	0.143	0.901	0.908	0.204	0.207	0.168	0.144	0.285	0.28	0.145	0.141	0.657	0.645	0.171	0.17	0.142	0.153	0.218	0.216	0.127
28:14:22	0.768	0.997	0.266	0.276	0.203	0.202	0.583	0.53	0.199	0.192	0.726	0.744	0.214	0.218	0.163	0.154	0.312	0.153	0.179	0.18	0.857	0.785	0.215	0.223	0.184	0.182	0.172	0.144	0.141	0.143	0.902	0.91	0.204	0.207	0.168	0.144	0.288	0.283	0.145	0.141	0.669	0.647	0.171	0.171	0.142	0.154	0.219	0.217	0.126
28:29:22	0.731	0.972	0.266	0.274	0.202	0.202	0.589	0.54	0.198	0.191	0.723	0.739	0.214	0.218	0.164	0.154	0.312	0.153	0.18	0.181	0.86	0.787	0.214	0.222	0.185	0.18	0.172	0.144	0.141	0.143	0.904	0.912	0.203	0.206	0.168	0.143	0.293	0.286	0.144	0.14	0.672	0.652	0.171	0.171	0.142	0.154	0.218	0.217	0.125
28:44:22	0.693	0.947	0.265	0.273	0.203	0.202	0.595	0.546	0.198	0.191	0.721	0.74	0.214	0.217	0.162	0.153	0.313	0.151	0.179	0.181	0.863	0.791	0.213	0.221	0.185	0.181	0.172	0.143	0.14	0.142	0.906	0.914	0.203	0.206	0.168	0.143	0.297	0.29	0.144	0.14	0.676	0.654	0.171	0.17	0.142	0.154	0.22	0.219	0.125
28:59:22	0.658	0.918	0.264	0.272	0.203	0.201	0.601	0.551	0.197	0.191	0.722	0.739	0.213	0.217	0.162	0.153	0.31	0.151	0.178	0.18	0.865	0.796	0.211	0.221	0.186	0.181	0.171	0.142	0.14	0.142	0.908	0.917	0.203	0.206	0.168	0.143	0.301	0.293	0.144	0.14	0.678	0.658	0.17	0.17	0.141	0.153	0.22	0.218	0.124
29:14:22	0.623	0.887	0.264	0.273	0.202	0.2	0.606	0.558	0.198	0.191	0.72	0.736	0.214	0.217	0.162	0.154	0.311	0.149	0.179	0.181	0.868	0.799	0.21	0.22	0.187	0.184	0.171	0.142	0.14	0.142	0.91	0.918	0.202	0.205	0.168	0.142	0.305	0.298	0.143	0.139	0.678	0.659	0.17	0.17	0.141	0.154	0.219	0.217	0.124
29:29:22	0.602	0.853	0.264	0.274	0.201	0.2	0.611	0.562	0.197	0.191	0.718	0.734	0.212	0.217	0.161	0.155	0.313	0.149	0.18	0.18	0.871	0.802	0.21	0.219	0.187	0.183	0.171	0.142	0.139	0.142	0.912	0.92	0.202	0.205	0.168	0.142	0.309	0.3	0.143	0.139	0.682	0.663	0.17	0.169	0.141	0.153	0.219	0.218	0.123
29:44:22	0.575	0.819	0.263	0.273	0.201	0.2	0.616	0.566	0.197	0.191	0.718	0.731	0.213	0.216	0.161	0.152	0.313	0.148	0.179	0.18	0.874	0.805	0.209	0.219	0.187	0.183	0.171	0.142	0.139	0.141	0.913	0.921	0.201	0.205	0.168	0.142	0.312	0.304	0.143	0.138	0.683	0.67	0.169	0.169	0.141	0.153	0.22	0.218	0.122
29:59:22	0.556	0.775	0.263	0.27	0.201	0.199	0.621	0.57	0.196	0.192	0.712	0.729	0.212	0.216	0.16	0.153	0.311	0.147	0.178	0.178	0.876	0.808	0.207	0.218	0.189	0.184	0.17	0.141	0.139	0.141	0.914	0.922	0.201	0.204	0.168	0.141	0.316	0.308	0.142	0.138	0.684	0.675	0.17	0.169	0.141	0.153	0.221	0.22	0.122
30:14:22	0.542	0.732	0.261	0.271	0.199	0.198	0.625	0.576	0.196	0.191	0.714	0.728	0.212	0.215	0.16	0.151	0.311	0.147	0.178	0.179	0.878	0.812	0.206	0.216	0.188	0.184	0.17	0.141	0.138	0.14	0.916	0.924	0.2	0.203	0.167	0.141	0.32	0.31	0.142	0.138	0.691	0.674	0.169	0.168	0.141	0.153	0.221	0.219	0.121
30:29:22	0.53	0.685	0.262	0.272	0.2	0.199	0.631	0.578	0.196	0.192	0.715	0.73	0.212	0.215	0.159	0.152	0.312	0.146	0.178	0.179	0.882	0.814	0.205	0.215	0.19	0.185	0.17	0.14	0.138	0.14	0.918	0.926	0.2	0.203	0.167	0.14	0.323	0.314	0.141	0.138	0.694	0.674	0.169	0.169	0.141	0.152	0.222	0.219	0.12
30:44:22	0.516	0.637	0.261	0.269	0.199	0.199	0.635	0.585	0.195	0.193	0.711	0.733	0.21	0.214	0.16	0.151	0.309	0.145	0.177	0.178	0.884	0.816	0.204	0.215	0.19	0.186	0.169	0.14	0.138	0.14	0.918	0.926	0.2	0.203	0.168	0.14	0.326	0.317	0.141	0.137	0.695	0.683	0.169	0.169	0.141	0.153	0.223	0.223	0.12
30:59:22	0.506	0.59	0.26	0.269	0.198	0.199	0.639	0.588	0.196	0.19	0.71	0.729	0.21	0.214	0.159	0.156	0.311	0.144	0.177	0.178	0.885	0.819	0.203	0.213	0.191	0.186	0.169	0.139	0.137	0.139	0.92	0.929	0.199	0.202	0.167	0.139	0.329	0.32	0.141	0.137	0.696	0.68	0.169	0.168	0.141	0.152	0.223	0.22	0.119
31:14:22	0.498	0.543	0.26	0.27	0.207	0.198	0.643	0.593	0.195	0.191	0.706	0.729	0.21	0.214	0.16	0.15	0.311	0.143	0.178	0.178	0.887	0.822	0.201	0.212	0.192	0.188	0.169	0.139	0.137	0.139	0.921	0.93	0.199	0.202	0.167	0.139	0.333	0.324	0.141	0.137	0.701	0.681	0.168	0.168	0.141	0.152	0.222	0.22	0.119
31:29:22	0.492	0.503	0.26	0.267	0.198	0.198	0.648	0.597	0.195	0.19	0.708	0.732	0.21	0.213	0.158	0.151	0.309	0.142	0.177	0.177	0.89	0.825	0.2	0.211	0.192	0.188	0.169	0.139	0.137	0.139	0.922	0.931	0.198	0.201	0.167	0.139	0.336	0.326	0.14	0.136	0.703	0.69	0.168	0.168	0.141	0.153	0.224	0.223	0.118
31:44:22	0.479	0.467	0.26	0.268	0.199	0.198	0.651	0.602	0.195	0.19	0.713	0.729	0.21	0.213	0.157	0.151	0.31	0.142	0.177	0.179	0.891	0.827	0.199	0.21	0.193	0.188	0.168	0.139	0.137	0.139	0.908	0.901	0.198	0.201	0.167	0.139	0.339	0.331	0.14	0.136	0.708	0.688	0.168	0.168	0.141	0.152	0.224	0.222	0.117
31:59:22	0.474	0.444	0.259	0.269	0.199	0.198	0.654	0.604	0.195	0.19	0.714	0.73	0.209	0.213	0.157	0.15	0.311	0.142	0.177	0.178	0.894	0.829	0.198	0.208	0.195	0.189	0.168	0.139	0.136	0.138	0.878	0.878	0.197	0.201	0.167	0.139	0.342	0.334	0.139	0.136	0.711	0.691	0.168	0.168	0.14	0.152	0.225	0.224	0.117
32:14:22	0.482	0.423	0.258	0.267	0.199	0.198	0.656	0.608	0.195	0.191	0.715	0.731	0.209	0.212	0.157	0.149	0.31	0.14	0.177	0.178	0.896	0.832	0.197	0.207	0.195	0.191	0.167	0.138	0.136	0.138	0.864	0.866	0.197	0.2	0.167	0.138	0.346	0.337	0.14	0.136	0.707	0.69	0.168	0.168	0.14	0.152	0.225	0.223	0.116
32:29:22	0.472	0.41	0.258	0.265	0.199	0.199	0.659	0.612	0.195	0.19	0.721	0.728	0.208	0.212	0.157	0.15	0.308	0.14	0.177	0.178	0.898	0.833	0.196	0.206	0.196	0.191	0.167	0.137	0.136	0.138	0.852	0.856	0.196	0.2	0.167	0.138	0.348	0.339	0.139	0.135	0.715	0.699	0.168	0.167	0.141	0.152	0.227	0.227	0.115
32:44:22	0.468	0.397	0.258	0.264	0.198	0.198	0.662	0.616	0.194	0.19	0.719	0.728	0.207	0.211	0.157	0.151	0.308	0.139	0.176	0.177	0.9	0.835	0.194	0.205	0.197	0.191	0.166	0.136	0.135	0.137	0.84	0.841	0.196	0.199	0.167	0.138	0.351	0.342	0.138	0.135	0.718	0.704	0.168	0.167	0.14	0.152	0.226	0.225	0.115
32:59:22	0.486	0.388	0.257	0.265	0.197	0.198	0.666	0.628	0.194	0.189	0.72	0.728	0.207	0.211	0.156	0.148	0.307	0.139	0.176	0.177	0.902	0.838	0.193	0.203	0.197	0.193	0.166	0.136	0.135	0.137	0.823	0.821	0.195	0.199	0.167	0.138	0.354	0.346	0.139	0.135	0.718	0.704	0.168	0.167	0.14	0.152	0.229	0.227	0.114
33:14:22	0.468	0.38	0.257	0.265	0.198	0.197	0.666	0.621	0.193	0.19	0.729	0.73	0.207	0.211	0.155	0.151	0.308	0.138	0.177	0.177	0.903	0.84	0.192	0.204	0.197	0.193	0.166	0.136	0.135	0.136	0.797	0.789	0.194	0.198	0.167	0.138	0.357	0.349	0.138	0.135	0.722	0.707	0.168	0.167	0.14	0.152	0.226	0.226	0.114
33:29:22	0.484	0.374	0.257	0.266	0.198	0.196	0.67	0.617	0.193	0.19	0.729	0.73	0.207	0.211	0.155	0.146	0.308	0.137	0.175	0.176	0.905	0.842	0.191	0.2	0.198	0.194	0.166	0.135	0.136	0.136	0.754	0.74	0.194	0.198	0.167	0.138	0.36	0.351	0.137	0.135	0.719	0.702	0.166	0.166	0.14	0.152	0.226	0.224	0.113
33:44:22	0.462	0.369	0.256	0.266	0.197	0.197	0.671	0.619	0.194	0.19	0.726	0.73	0.206	0.21	0.154	0.146	0.311	0.138	0.176	0.178	0.907	0.844	0.19	0.199	0.199	0.194	0.166	0.136	0.135	0.136	0.7	0.683	0.193	0.198	0.167	0.138	0.364	0.354	0.137	0.135	0.719	0.706	0.167	0.166	0.14	0.151	0.226	0.226	0.113
33:59:22	0.459	0.365	0.255	0.264	0.196	0.197	0.672	0.62	0.193	0.19	0.729	0.731	0.206	0.21	0.154	0.146	0.311	0.137	0.176	0.178	0.908	0.846	0.189	0.198	0.199	0.195	0.165	0.135	0.135	0.135	0.644	0.626	0.193	0.197	0.167	0.137	0.366	0.358	0.137	0.134	0.723	0.709	0.166	0.166	0.14	0.152	0.227	0.226	0.112
34:14:22	0.463	0.364	0.255	0.264	0.196	0.197	0.67	0.615	0.193	0.19	0.728	0.729	0.206	0.209	0.154	0.146	0.31	0.136	0.176	0.178	0.91	0.848	0.188	0.197	0.201	0.196	0.165	0.134	0.134	0.135	0.597	0.577	0.192	0.197	0.166	0.137	0.37	0.361	0.137	0.133	0.727	0.713	0.166	0.166	0.14	0.151	0.227	0.226	0.112
34:29:22	0.477	0.359	0.255	0.264	0.196	0.197	0.671	0.621	0.193	0.19	0.727	0.729	0.205	0.209	0.153	0.147	0.309	0.136	0.175	0.176	0.912	0.849	0.187	0.196	0.202	0.198	0.165	0.134	0.133	0.135	0.556	0.542	0.192	0.196	0.166	0.137	0.372	0.365	0.136	0.133	0.725	0.714	0.166	0.166	0.14	0.151	0.228	0.227	0.111
34:44:22	0.479	0.356	0.254	0.262	0.195	0.197	0.669	0.614	0.193	0.188	0.732	0.73	0.205	0.208	0.152	0.146	0.308	0.135	0.176	0.177	0.913	0.851	0.187	0.195	0.202	0.198	0.165	0.134	0.133	0.134	0.527	0.516	0.191	0.196	0.166	0.137	0.375	0.368	0.136	0.132	0.731	0.714	0.166	0.165	0.14	0.151	0.229	0.227	0.111
34:59:22	0.465	0.354	0.254	0.262	0.196	0.197	0.669	0.615	0.193	0.189	0.732	0.731	0.204	0.208	0.151	0.146	0.308	0.134	0.175	0.175	0.914	0.852	0.185	0.193	0.203	0.199	0.165	0.133	0.133	0.134	0.506	0.497	0.191	0.195	0.166	0.137	0.378	0.369	0.135	0.131	0.731	0.714	0.166	0.165	0.14	0.151	0.23	0.228	0.11
35:14:22	0.468	0.352	0.253	0.262	0.195	0.196	0.668	0.613	0.194	0.189	0.736	0.727	0.204	0.207	0.152	0.147	0.307	0.134	0.175	0.175	0.916	0.853	0.184	0.192	0.204	0.2	0.164	0.133	0.132	0.134	0.493	0.481	0.19	0.195	0.166	0.137	0.38	0.371	0.134	0.13	0.732	0.721	0.166	0.165	0.139	0.151	0.229	0.228	0.11
35:29:22	0.49	0.349	0.253	0.262	0.195	0.197	0.665	0.622	0.193	0.188	0.734	0.728	0.204	0.207	0.151	0.145	0.308	0.134	0.175	0.176	0.917	0.854	0.184	0.191	0.205	0.202	0.164	0.132	0.132	0.133	0.477	0.471	0.19	0.194	0.166	0.136	0.383	0.374	0.134	0.128	0.733	0.722	0.166	0.165	0.139	0.151	0.23	0.229	0.109
35:44:22	0.486	0.346	0.253	0.262	0.195	0.196	0.672	0.62	0.195	0.189	0.735	0.727	0.203	0.207	0.15	0.146	0.309	0.134	0.176	0.175	0.92	0.858	0.183	0.19	0.205	0.202	0.164	0.131	0.132	0.132	0.465	0.46	0.189	0.194	0.166	0.137	0.385	0.377	0.133	0.127	0.733	0.721	0.165	0.164	0.14	0.152	0.23	0.229	0.11
35:59:22	0.458	0.342	0.252	0.261	0.195	0.195	0.663	0.613	0.193	0.188	0.733	0.73	0.202	0.206	0.149	0.144	0.307	0.133	0.174	0.175	0.92	0.857	0.181	0.188	0.205	0.202	0.163	0.131	0.131	0.132	0.455	0.449	0.189	0.193	0.165	0.137	0.388	0.379	0.131	0.126	0.74	0.724	0.164	0.164	0.139	0.15	0.231	0.23	0.108
36:14:22	0.458	0.341	0.252	0.259	0.194	0.195	0.656	0.604	0.193	0.189	0.733	0.729	0.202	0.205	0.15	0.144	0.306	0.132	0.175	0.174	0.922	0.859	0.181	0.187	0.208	0.203	0.162	0.13	0.131	0.131	0.447	0.443	0.188	0.193	0.166	0.137	0.391	0.383	0.129	0.124	0.739	0.725	0.165	0.165	0.139	0.15	0.232	0.231	0.108
36:29:22	0.454	0.337	0.251	0.259	0.194	0.195	0.661	0.625	0.194	0.189	0.733	0.738	0.202	0.205	0.149	0.144	0.306	0.132	0.175	0.175	0.923	0.861	0.18	0.186	0.208	0.205	0.163	0.131	0.13	0.131	0.443	0.437	0.188	0.193	0.165	0.137	0.393	0.386	0.129	0.123	0.737	0.728	0.164	0.164	0.139	0.15	0.231	0.231	0.108
36:44:22	0.439	0.336	0.252	0.259	0.194	0.195	0.659	0.623	0.194	0.189	0.741	0.743	0.201	0.205	0.148	0.144	0.306	0.132	0.177	0.175	0.924	0.862	0.179	0.185	0.208	0.205	0.163	0.13	0.13	0.131	0.435	0.431	0.188	0.192	0.166	0.136	0.395	0.388	0.127	0.122	0.742	0.733	0.165	0.164	0.139	0.15	0.232	0.23	0.107
36:59:22	0.431	0.335	0.251	0.259	0.193	0.194	0.66	0.61	0.194	0.189	0.753	0.748	0.201	0.205	0.147	0.144	0.306	0.132	0.175	0.176	0.925	0.864	0.178	0.185	0.209	0.205	0.162	0.13	0.129	0.13	0.429	0.426	0.187	0.192	0.165	0.136	0.398	0.392	0.126	0.122	0.747	0.73	0.164	0.163	0.139	0.15	0.231	0.23	0.107
37:14:22	0.454	0.333	0.25	0.258	0.194	0.194	0.662	0.609	0.194	0.191	0.754	0.755	0.2	0.204	0.147	0.143	0.306	0.131	0.174	0.175	0.924	0.865	0.177	0.183	0.209	0.207	0.162	0.128	0.129	0.13	0.43	0.422	0.187	0.191	0.165	0.136	0.401	0.394	0.125	0.121	0.739	0.735	0.164	0.163	0.138	0.15	0.233	0.231	0.107
37:29:22	0.46	0.328	0.251	0.259	0.193	0.195	0.659	0.596	0.194	0.19	0.746	0.791	0.2	0.203	0.147	0.143	0.306	0.131	0.174	0.175	0.884	0.866	0.176	0.182	0.21	0.207	0.161	0.128	0.128	0.128	0.421	0.42	0.186	0.191	0.165	0.136	0.403	0.395	0.124	0.12	0.744	0.735	0.164	0.163	0.138	0.15	0.234	0.231	0.106
37:44:22	0.448	0.33	0.249	0.257	0.192	0.194	0.665	0.611	0.193	0.19	0.744	0.772	0.199	0.203	0.146	0.143	0.305	0.13	0.174	0.175	0.86	0.867	0.175	0.181	0.212	0.208	0.161	0.128	0.127	0.128	0.421	0.416	0.186	0.19	0.165	0.136	0.405	0.397	0.123	0.12	0.747	0.736	0.163	0.164	0.138	0.15	0.233	0.231	0.106
37:59:22	0.469	0.34	0.25	0.256	0.192	0.195	0.662	0.602	0.193	0.189	0.812	0.792	0.199	0.202	0.146	0.143	0.303	0.13	0.174	0.174	0.847	0.868	0.175	0.181	0.211	0.208	0.16	0.128	0.127	0.127	0.412	0.413	0.186	0.19	0.165	0.135	0.408	0.4	0.122	0.119	0.756	0.737	0.164	0.163	0.139	0.15	0.235	0.234	0.106
38:14:22	0.431	0.333	0.25	0.256	0.193	0.194	0.661	0.61	0.193	0.189	0.79	0.798	0.199	0.202	0.146	0.142	0.305	0.129	0.174	0.175	0.819	0.87	0.174	0.179	0.213	0.208	0.161	0.128	0.126	0.127	0.411	0.408	0.185	0.19	0.165	0.135	0.41	0.402	0.122	0.118	0.747	0.735	0.163	0.163	0.138	0.149	0.234	0.234	0.105
38:29:22	0.433	0.331	0.249	0.256	0.192	0.194	0.667	0.609	0.193	0.188	0.796	0.793	0.198	0.201	0.145	0.142	0.305	0.13	0.173	0.174	0.731	0.87	0.173	0.179	0.214	0.21	0.159	0.127	0.126	0.126	0.405	0.408	0.185	0.189	0.164	0.136	0.412	0.406	0.121	0.118	0.753	0.734	0.163	0.162	0.138	0.149	0.234	0.232	0.105
38:44:22	0.418	0.322	0.248	0.256	0.191	0.194	0.665	0.609	0.194	0.188	0.786	0.786	0.198	0.201	0.144	0.142	0.304	0.129	0.172	0.174	0.627	0.871	0.173	0.178	0.214	0.21	0.159	0.127	0.125	0.125	0.403	0.404	0.184	0.189	0.164	0.135	0.414	0.408	0.121	0.118	0.754	0.734	0.163	0.162	0.138	0.149	0.234	0.234	0.105
38:59:22	0.41	0.343	0.249	0.254	0.191	0.196	0.651	0.604	0.192	0.189	0.789	0.776	0.197	0.2	0.144	0.141	0.3	0.129	0.173	0.174	0.536	0.873	0.172	0.177	0.215	0.211	0.158	0.126	0.124	0.125	0.4	0.4	0.183	0.188	0.165	0.136	0.417	0.41	0.12	0.117	0.757	0.747	0.163	0.162	0.139	0.149	0.237	0.235	0.105
39:14:22	0.438	0.346	0.248	0.255	0.191	0.195	0.672	0.612	0.192	0.189	0.779	0.771	0.197	0.2	0.144	0.142	0.303	0.129	0.173	0.175	0.473	0.874	0.171	0.177	0.215	0.213	0.159	0.126	0.124	0.124	0.398	0.4	0.183	0.188	0.164	0.136	0.419	0.413	0.12	0.117	0.754	0.744	0.162	0.162	0.138	0.149	0.235	0.234	0.104
39:29:22	0.432	0.327	0.248	0.253	0.191	0.195	0.66	0.613	0.192	0.19	0.779	0.764	0.196	0.199	0.144	0.143	0.3	0.128	0.172	0.173	0.423	0.874	0.17	0.175	0.215	0.213	0.158	0.126	0.123	0.126	0.395	0.396	0.183	0.187	0.164	0.135	0.422	0.414	0.119	0.117	0.757	0.75	0.163	0.162	0.138	0.148	0.237	0.234	0.104
39:44:22	0.426	0.338	0.247	0.253	0.19	0.193	0.668	0.607	0.192	0.189	0.751	0.755	0.196	0.199	0.143	0.142	0.301	0.128	0.172	0.174	0.382	0.876	0.169	0.175	0.217	0.213	0.159	0.125	0.122	0.124	0.395	0.394	0.183	0.187	0.164	0.135	0.424	0.417	0.119	0.116	0.765	0.744	0.162	0.162	0.138	0.149	0.237	0.234	0.108
39:59:22	0.405	0.328	0.248	0.253	0.19	0.194	0.668	0.607	0.192	0.191	0.737	0.743	0.195	0.199	0.143	0.141	0.301	0.129	0.171	0.174	0.357	0.878	0.169	0.174	0.217	0.214	0.159	0.125	0.121	0.123	0.391	0.391	0.182	0.187	0.164	0.135	0.427	0.419	0.119	0.116	0.76	0.755	0.162	0.161	0.138	0.15	0.237	0.236	0.103
40:14:22	0.425	0.346	0.246	0.254	0.19	0.193	0.679	0.613	0.193	0.189	0.725	0.73	0.195	0.198	0.142	0.141	0.302	0.128	0.172	0.174	0.332	0.877	0.168	0.174	0.218	0.215	0.158	0.125	0.121	0.122	0.388	0.391	0.181	0.186	0.163	0.135	0.428	0.422	0.119	0.115	0.76	0.748	0.161	0.161	0.138	0.148	0.237	0.234	0.103
40:29:22	0.432	0.319	0.246	0.252	0.19	0.192	0.683	0.616	0.193	0.188	0.715	0.724	0.195	0.198	0.142	0.14	0.302	0.128	0.173	0.175	0.314	0.873	0.168	0.172	0.219	0.216	0.158	0.125	0.12	0.122	0.388	0.388	0.181	0.186	0.164	0.135	0.43	0.423	0.118	0.116	0.759	0.758	0.161	0.161	0.138	0.148	0.236	0.234	0.103
40:44:22	0.412	0.353	0.246	0.253	0.19	0.192	0.681	0.605	0.192	0.19	0.709	0.732	0.194	0.198	0.142	0.143	0.301	0.129	0.172	0.175	0.301	0.841	0.167	0.172	0.22	0.216	0.158	0.127	0.12	0.121	0.387	0.386	0.181	0.186	0.164	0.135	0.433	0.426	0.119	0.115	0.766	0.748	0.161	0.161	0.138	0.149	0.237	0.235	0.107
40:59:22	0.419	0.348	0.246	0.252	0.189	0.194	0.682	0.611	0.192	0.19	0.694	0.708	0.194	0.197	0.141	0.14	0.299	0.128	0.173	0.175	0.29	0.825	0.166	0.171	0.221	0.216	0.157	0.125	0.119	0.12	0.383	0.384	0.18	0.185	0.163	0.135	0.435	0.427	0.118	0.115	0.763	0.754	0.161	0.161	0.138	0.149	0.236	0.234	0.103
41:14:22	0.417	0.359	0.246	0.252	0.188	0.193	0.677	0.614	0.192	0.189	0.686	0.744	0.193	0.197	0.141	0.144	0.3	0.128	0.172	0.175	0.283	0.811	0.166	0.171	0.221	0.217	0.157	0.125	0.119	0.12	0.382	0.382	0.179	0.185	0.163	0.135	0.437	0.429	0.118	0.116	0.764	0.763	0.161	0.16	0.138	0.149	0.238	0.235	0.103
41:29:22	0.431	0.326	0.245	0.251	0.187	0.192	0.677	0.611	0.191	0.19	0.676	0.7	0.193	0.197	0.14	0.14	0.3	0.128	0.172	0.175	0.276	0.777	0.165	0.17	0.22	0.218	0.156	0.125	0.118	0.119	0.382	0.38	0.18	0.185	0.163	0.134	0.439	0.431	0.118	0.116	0.758	0.757	0.161	0.16	0.138	0.148	0.237	0.235	0.103
41:44:22	0.402	0.331	0.245	0.249	0.188	0.194	0.67	0.614	0.192	0.189	0.665	0.689	0.192	0.195	0.14	0.141	0.296	0.127	0.171	0.175	0.269	0.714	0.164	0.169	0.221	0.221	0.156	0.124	0.118	0.118	0.377	0.379	0.179	0.184	0.163	0.134	0.441	0.432	0.117	0.115	0.764	0.761	0.161	0.161	0.138	0.148	0.239	0.236	0.103
41:59:22	0.403	0.35	0.244	0.25	0.188	0.192	0.676	0.609	0.193	0.189	0.655	0.674	0.193	0.195	0.14	0.14	0.297	0.128	0.171	0.174	0.264	0.652	0.164	0.169	0.223	0.22	0.155	0.124	0.117	0.119	0.378	0.377	0.179	0.184	0.163	0.135	0.443	0.435	0.118	0.115	0.762	0.756	0.16	0.16	0.138	0.148	0.239	0.236	0.11
42:14:22	0.404	0.348	0.244	0.249	0.187	0.191	0.665	0.613	0.191	0.189	0.643	0.666	0.191	0.194	0.14	0.139	0.295	0.127	0.171	0.174	0.26	0.587	0.163	0.168	0.222	0.22	0.154	0.124	0.117	0.118	0.373	0.376	0.178	0.184	0.163	0.135	0.444	0.434	0.118	0.115	0.764	0.768	0.16	0.16	0.138	0.147	0.24	0.236	0.103
42:29:22	0.434	0.331	0.245	0.25	0.187	0.191	0.673	0.616	0.191	0.189	0.634	0.657	0.192	0.194	0.139	0.141	0.298	0.128	0.172	0.175	0.255	0.548	0.162	0.167	0.223	0.222	0.155	0.123	0.116	0.118	0.373	0.374	0.178	0.183	0.163	0.134	0.445	0.437	0.117	0.115	0.765	0.756	0.159	0.159	0.137	0.148	0.238	0.236	0.102
42:44:22	0.439	0.335	0.244	0.248	0.187	0.19	0.678	0.607	0.191	0.188	0.623	0.646	0.191	0.194	0.139	0.141	0.297	0.128	0.172	0.174	0.251	0.518	0.162	0.167	0.223	0.221	0.155	0.126	0.116	0.119	0.371	0.376	0.178	0.183	0.163	0.134	0.448	0.44	0.117	0.115	0.768	0.758	0.16	0.159	0.137	0.147	0.24	0.238	0.102
42:59:22	0.405	0.355	0.243	0.249	0.187	0.191	0.669	0.609	0.192	0.188	0.612	0.636	0.191	0.193	0.139	0.143	0.296	0.127	0.172	0.173	0.251	0.498	0.161	0.166	0.225	0.222	0.155	0.123	0.115	0.118	0.371	0.372	0.178	0.182	0.163	0.134	0.449	0.443	0.117	0.115	0.734	0.725	0.16	0.159	0.137	0.148	0.24	0.238	0.102
43:14:22	0.469	0.386	0.242	0.248	0.186	0.19	0.682	0.609	0.191	0.188	0.603	0.626	0.19	0.193	0.138	0.14	0.295	0.128	0.171	0.173	0.247	0.478	0.161	0.166	0.226	0.222	0.153	0.123	0.115	0.117	0.366	0.372	0.177	0.182	0.162	0.135	0.451	0.445	0.117	0.115	0.714	0.713	0.159	0.159	0.137	0.147	0.241	0.239	0.103
43:29:22	0.407	0.324	0.242	0.248	0.186	0.191	0.673	0.612	0.19	0.186	0.595	0.616	0.19	0.193	0.138	0.142	0.293	0.127	0.171	0.173	0.243	0.462	0.16	0.164	0.226	0.225	0.153	0.124	0.114	0.116	0.365	0.369	0.176	0.181	0.162	0.133	0.451	0.445	0.117	0.114	0.712	0.717	0.159	0.158	0.137	0.148	0.24	0.238	0.105
43:44:22	0.43	0.331	0.242	0.248	0.186	0.19	0.685	0.618	0.192	0.188	0.584	0.607	0.19	0.192	0.138	0.14	0.294	0.127	0.171	0.173	0.242	0.448	0.159	0.165	0.227	0.225	0.153	0.123	0.114	0.116	0.367	0.369	0.176	0.181	0.162	0.133	0.454	0.447	0.117	0.114	0.701	0.704	0.158	0.158	0.137	0.146	0.24	0.239	0.103
43:59:22	0.398	0.393	0.243	0.248	0.186	0.193	0.682	0.605	0.192	0.188	0.576	0.597	0.189	0.192	0.138	0.141	0.294	0.127	0.172	0.172	0.239	0.436	0.159	0.164	0.227	0.226	0.154	0.122	0.114	0.116	0.362	0.366	0.176	0.181	0.162	0.133	0.455	0.448	0.117	0.115	0.7	0.705	0.159	0.158	0.137	0.147	0.242	0.239	0.103
44:14:22	0.411	0.327	0.242	0.245	0.185	0.194	0.67	0.605	0.191	0.186	0.565	0.586	0.188	0.191	0.137	0.14	0.292	0.127	0.17	0.171	0.236	0.425	0.158	0.163	0.227	0.227	0.152	0.122	0.114	0.116	0.359	0.365	0.175	0.18	0.162	0.133	0.456	0.449	0.116	0.114	0.691	0.692	0.159	0.158	0.137	0.146	0.241	0.237	0.102
44:29:22	0.441	0.347	0.241	0.245	0.185	0.189	0.683	0.633	0.19	0.186	0.558	0.579	0.189	0.191	0.137	0.139	0.293	0.127	0.171	0.171	0.235	0.415	0.158	0.163	0.227	0.227	0.153	0.123	0.113	0.116	0.36	0.365	0.175	0.18	0.162	0.132	0.458	0.451	0.117	0.114	0.686	0.69	0.158	0.157	0.137	0.146	0.24	0.238	0.103
44:44:22	0.415	0.331	0.241	0.246	0.185	0.19	0.684	0.62	0.191	0.189	0.552	0.57	0.188	0.191	0.136	0.139	0.292	0.128	0.171	0.172	0.235	0.41	0.157	0.162	0.228	0.227	0.152	0.123	0.113	0.116	0.362	0.365	0.175	0.18	0.162	0.132	0.46	0.452	0.117	0.115	0.684	0.687	0.158	0.158	0.136	0.146	0.24	0.238	0.102
44:59:22	0.44	0.33	0.242	0.246	0.185	0.19	0.691	0.627	0.19	0.189	0.543	0.562	0.187	0.191	0.137	0.14	0.292	0.128	0.171	0.171	0.23	0.402	0.156	0.162	0.229	0.227	0.152	0.122	0.113	0.116	0.358	0.363	0.175	0.179	0.162	0.132	0.461	0.455	0.117	0.115	0.69	0.692	0.158	0.157	0.137	0.146	0.24	0.238	0.102
45:14:22	0.456	0.299	0.241	0.245	0.185	0.2	0.677	0.616	0.19	0.188	0.536	0.553	0.187	0.19	0.137	0.139	0.291	0.127	0.171	0.17	0.23	0.396	0.156	0.161	0.229	0.227	0.152	0.122	0.113	0.115	0.362	0.358	0.174	0.179	0.162	0.132	0.463	0.456	0.117	0.115	0.699	0.698	0.158	0.157	0.137	0.146	0.243	0.239	0.102
45:29:22	0.423	0.39	0.241	0.243	0.184	0.191	0.673	0.616	0.19	0.186	0.529	0.545	0.187	0.19	0.137	0.139	0.289	0.127	0.169	0.169	0.227	0.388	0.155	0.161	0.23	0.229	0.151	0.123	0.112	0.115	0.356	0.357	0.173	0.179	0.161	0.132	0.465	0.455	0.116	0.115	0.691	0.68	0.158	0.157	0.136	0.146	0.242	0.238	0.102
45:44:22	0.435	0.396	0.24	0.244	0.184	0.192	0.69	0.623	0.189	0.188	0.522	0.538	0.186	0.189	0.137	0.139	0.288	0.128	0.168	0.169	0.224	0.384	0.155	0.16	0.229	0.228	0.152	0.123	0.113	0.115	0.351	0.357	0.173	0.178	0.162	0.132	0.465	0.457	0.117	0.115	0.671	0.663	0.158	0.157	0.137	0.146	0.243	0.24	0.102
45:59:22	0.391	0.346	0.24	0.243	0.184	0.19	0.674	0.618	0.19	0.188	0.513	0.529	0.186	0.188	0.136	0.139	0.288	0.127	0.169	0.168	0.222	0.377	0.154	0.16	0.23	0.23	0.151	0.122	0.112	0.115	0.351	0.357	0.173	0.178	0.161	0.132	0.466	0.457	0.117	0.114	0.645	0.636	0.158	0.157	0.137	0.146	0.242	0.239	0.102
46:14:22	0.397	0.345	0.24	0.243	0.183	0.189	0.684	0.609	0.189	0.186	0.508	0.523	0.186	0.189	0.136	0.138	0.288	0.128	0.169	0.168	0.223	0.373	0.154	0.159	0.23	0.23	0.151	0.123	0.112	0.114	0.351	0.36	0.172	0.178	0.161	0.13	0.468	0.46	0.116	0.115	0.618	0.612	0.157	0.156	0.136	0.146	0.243	0.24	0.102
46:29:22	0.4	0.33	0.24	0.244	0.184	0.19	0.685	0.617	0.189	0.188	0.502	0.516	0.185	0.188	0.136	0.138	0.288	0.128	0.169	0.168	0.221	0.373	0.153	0.158	0.232	0.23	0.151	0.122	0.113	0.115	0.352	0.358	0.172	0.177	0.161	0.131	0.47	0.462	0.117	0.115	0.593	0.596	0.157	0.156	0.136	0.145	0.244	0.24	0.102
46:44:22	0.422	0.316	0.239	0.242	0.183	0.189	0.68	0.619	0.19	0.187	0.498	0.509	0.185	0.188	0.135	0.138	0.286	0.127	0.168	0.168	0.218	0.367	0.153	0.158	0.232	0.231	0.15	0.123	0.112	0.114	0.352	0.356	0.172	0.177	0.161	0.13	0.469	0.461	0.117	0.115	0.579	0.574	0.156	0.156	0.136	0.145	0.243	0.239	0.102
46:59:22	0.444	0.349	0.239	0.242	0.183	0.188	0.667	0.623	0.188	0.187	0.494	0.503	0.185	0.188	0.135	0.158	0.288	0.127	0.168	0.166	0.219	0.363	0.153	0.158	0.232	0.231	0.15	0.121	0.112	0.114	0.352	0.353	0.171	0.177	0.16	0.13	0.471	0.463	0.116	0.115	0.555	0.556	0.157	0.156	0.136	0.145	0.243	0.239	0.102
47:14:22	0.463	0.348	0.239	0.241	0.183	0.188	0.677	0.618	0.189	0.186	0.485	0.496	0.185	0.187	0.134	0.149	0.286	0.127	0.168	0.166	0.216	0.357	0.152	0.157	0.231	0.231	0.15	0.121	0.112	0.114	0.351	0.354	0.171	0.176	0.16	0.13	0.473	0.465	0.117	0.115	0.539	0.54	0.156	0.156	0.136	0.145	0.243	0.24	0.101
47:29:22	0.385	0.357	0.238	0.241	0.182	0.188	0.681	0.609	0.188	0.185	0.48	0.49	0.184	0.186	0.134	0.15	0.284	0.127	0.166	0.165	0.215	0.354	0.151	0.156	0.231	0.232	0.149	0.121	0.112	0.114	0.35	0.351	0.17	0.176	0.16	0.129	0.474	0.464	0.116	0.115	0.525	0.521	0.156	0.156	0.136	0.146	0.244	0.241	0.101
47:44:22	0.414	0.359	0.238	0.24	0.182	0.188	0.672	0.623	0.188	0.187	0.475	0.484	0.184	0.187	0.134	0.149	0.286	0.128	0.167	0.165	0.213	0.351	0.151	0.156	0.233	0.232	0.149	0.121	0.112	0.115	0.351	0.354	0.171	0.176	0.16	0.13	0.473	0.466	0.117	0.115	0.505	0.502	0.156	0.156	0.136	0.144	0.244	0.239	0.102
47:59:22	0.41	0.313	0.238	0.241	0.182	0.189	0.673	0.62	0.188	0.186	0.471	0.479	0.183	0.186	0.134	0.146	0.286	0.127	0.166	0.165	0.213	0.348	0.151	0.156	0.233	0.234	0.149	0.121	0.111	0.114	0.349	0.35	0.17	0.176	0.16	0.129	0.476	0.469	0.117	0.115	0.488	0.484	0.155	0.155	0.136	0.144	0.245	0.241	0.101
48:14:22	0.461	0.384	0.238	0.24	0.183	0.189	0.674	0.61	0.187	0.184	0.465	0.474	0.183	0.185	0.134	0.149	0.285	0.127	0.165	0.164	0.211	0.343	0.15	0.155	0.233	0.232	0.148	0.121	0.111	0.114	0.346	0.347	0.169	0.175	0.16	0.129	0.476	0.471	0.117	0.115	0.469	0.468	0.156	0.156	0.135	0.144	0.245	0.24	0.108
[truncated: 41 more columns]
