# Supplementary material for: Multi-omics investigation of Clostridioides difficile-colonized patients reveals pathogen and commensal correlates of C. difficile pathogenesis
Source: eLife. 2022 Jan 27;11:e72801. doi: 10.7554/eLife.72801 (PMC8794467; doi:10.7554/eLife.72801)
Supplement: Supplementary file 1. [file elife-72801-supp1.xlsx]

## Sheet: Sheet1
Ward at stool collection	Cx+/EIA+	Cx+/EIA-
Ward	50 (81%)	50 (81%)
Oncology	9 (15%)	9 (15%)
ICU	3 (5%)	3 (5%)
Age, categorical
≦ 45	10 (16%)	17 (27%)
>45-≦65	20 (32%)	22 (36%)
>65-≦85	27 (44%)	21 (34%)
>85	5 (8%)	2 (3%)
Female	35 (57%)	35 (57%)
Race
Caucasian	49 (79%)	37 (60%)
African American	9 (15%)	22 (36%)
Other	0 (0%)	1 (2%)
Unknown	4 (7%)	2 (3%)
Toxin status
Toxin A	62 (100%)	62 (100%)
Toxin B	62 (100%)	61 (98%)
Binary toxin	26 (42%)	9 (15%)
C. difficile strain
027	22 (36%)	8 (13%)
106/174	11 (18%)	6 (10%)
WU27	6 (10%)	1 (2%)
002	4 (7%)	3 (5%)
001	4 (7%)	6 (10%)
WU8	3 (5%)	1 (2%)
014/020	2 (3%)	9 (15%)
017	2 (3%)	2 (3%)
WU2	1 (2%)	4 (7%)
WU30	0 (0%)	2 (3%)
WU36	0 (0%)	4 (7%)
075	0 (0%)	4 (7%)
015/046	0 (0%)	2 (3%)
070	0 (0%)	2 (3%)
Other strain	5 (8%)	8 (13%)
