# Supplementary material for: Multi-omics investigation of Clostridioides difficile-colonized patients reveals pathogen and commensal correlates of C. difficile pathogenesis
Source: eLife. 2022 Jan 27;11:e72801. doi: 10.7554/eLife.72801 (PMC8794467; doi:10.7554/eLife.72801)
Supplement: Supplementary file 2. [file elife-72801-supp2.xlsx]

## Sheet: 211107_EIA_CDT_metadata_v2
CDT	ID	Cdiff_EIA	Ribotype	Ribotype_cull
positive	Stool 8	positive	NA	Other
negative	Stool 44	negative	1/VPI/77/87	Other
negative	Stool 98	negative	None	Other
positive	Stool 15	positive	027-like	R027
negative	Stool 5	positive	106/174	R106_174
negative	Stool 53	negative	None	Other
negative	Stool 18	negative	None	Other
negative	Stool 75	negative	NA	Other
negative	Stool 12	positive	106/174	R106_174
positive	Stool 91	negative	NA	Other
negative	Stool 54	positive	None	Other
negative	Stool 38	negative	14/20	R014_020
negative	Stool 67	positive	1/VPI/77/87	Other
negative	Stool 65	negative	None	Other
negative	Stool 56	negative	None	Other
negative	Stool 14	negative	None	Other
negative	Stool 92	negative	None	Other
positive	Stool 73	positive	None	Other
negative	Stool 94	positive	NA	Other
negative	Stool 31	positive	106/174	R106_174
positive	Stool 93	positive	NA	Other
positive	Stool 89	positive	027-like	R027
negative	Stool 72	positive	None	Other
negative	Stool 4	negative	70/75	Other
negative	Stool 23	positive	None	Other
negative	Stool 22	positive	NA	Other
negative	Stool 29	negative	1/VPI/77/87	Other
negative	Stool 13	positive	None	Other
positive	Stool 68	positive	NA	Other
positive	Stool 33	positive	NA	Other
negative	Stool 36	negative	14/20	R014_020
positive	Stool 60	positive	NA	Other
negative	Stool 34	positive	1/VPI/77/87	Other
negative	Stool 6	negative	14/20	R014_020
negative	Stool 66	negative	1/VPI/77/87	Other
positive	Stool 11	positive	NA	Other
negative	Stool 95	negative	15/46	Other
negative	Stool 32	negative	1975-02-01	Other
negative	Stool 84	negative	1975-02-01	Other
negative	Stool 9	positive	106/174	R106_174
negative	Stool 99	positive	None	Other
negative	Stool 83	negative	None	Other
positive	Stool 78	positive	NA	Other
negative	Stool 90	negative	NA	Other
positive	Stool 76	negative	NA	Other
positive	Stool 88	negative	NA	Other
positive	Stool 51	negative	027-like	R027
negative	Stool 30	negative	14/20	R014_020
negative	Stool 39	negative	15/46	Other
positive	Stool 79	positive	027-like	R027
negative	Stool 61	negative	106/174	R106_174
negative	Stool 62	positive	106/174	R106_174
negative	Stool 87	positive	None	Other
positive	Stool 17	positive	NA	Other
negative	Stool 85	negative	None	Other
negative	Stool 48	negative	None	Other
negative	Stool 102	negative	None	Other
negative	Stool 97	positive	1/VPI/77/87	Other
negative	Stool 69	positive	14/20	R014_020
positive	Stool 59	positive	NA	Other
negative	Stool 1	negative	None	Other
negative	Stool 41	negative	106/174	R106_174
negative	Stool 3	negative	70/75	Other
negative	Stool 101	positive	None	Other
negative	Stool 50	negative	NA	Other
negative	Stool 19	negative	106/174	R106_174
negative	Stool 81	positive	NA	Other
negative	Stool 40	negative	None	Other
positive	Stool 52	positive	027-like	R027
negative	Stool 49	negative	1/VPI/77/87	Other
negative	Stool 28	negative	14/20	R014_020
negative	Stool 86	negative	NA	Other
negative	Stool 27	positive	1/VPI/77/87	Other
negative	Stool 45	negative	None	Other
negative	Stool 26	positive	None	Other
negative	Stool 20	positive	NA	Other
negative	Stool 16	positive	14/20	R014_020
negative	Stool 63	negative	1975-02-01	Other
negative	Stool 100	positive	106/174	R106_174
negative	Stool 21	negative	14/20	R014_020
negative	Stool 24	positive	106/174	R106_174
negative	Stool 64	negative	106/174	R106_174
negative	Stool 25	positive	NA	Other
positive	Stool 2	positive	027 -like	R027
negative	Stool 47	negative	NA	Other
negative	Stool 10	negative	106/174	R106_174
negative	Stool 80	positive	106/174	R106_174
negative	Stool 96	positive	106/174	R106_174
negative	Stool 43	negative	1975-02-01	Other
positive	Stool 70	negative	027-like	R027
negative	Stool 55	negative	None	Other
negative	Stool 71	positive	None	Other
negative	Stool 46	positive	NA	Other
negative	Stool 58	negative	None	Other
negative	Stool 57	positive	None	Other
negative	Stool 42	negative	106/174	R106_174
positive	Stool 74	positive	027-like	R027
negative	Stool 7	positive	NA	Other
negative	Stool 82	negative	14/20	R014_020
negative	Stool 35	negative	14/20	R014_020
negative	Stool 37	negative	14/20	R014_020
positive	Stool 77	negative	None	Other
