# Supplementary material for: Multi-omics investigation of Clostridioides difficile-colonized patients reveals pathogen and commensal correlates of C. difficile pathogenesis
Source: eLife. 2022 Jan 27;11:e72801. doi: 10.7554/eLife.72801 (PMC8794467; doi:10.7554/eLife.72801)
Supplement: Supplementary file 3. [file elife-72801-supp3.xlsx]

## Sheet: 200701_significant_metabolites
feature	EIA association	coef	qval	Feature Label	Base Peak	Retention Time	Identity	Confidence
Metabolite-1352	negative	-4.24165	0.0045482	230.0_11.472658	230	11.4727	4-hydroxyproline	solid NIST match
Metabolite-2167	negative	-3.78146	0.060785	D-Sorbitol, 6TMS derivative	73	15.9947	sugar alcohol, maybe sorbitol	NIST match, sugars are hard to ID
Metabolite-1149	negative	-3.57144	0.060785	D-(-)-Fructofuranose, pentakis(trimethylsilyl) ether (isomer 2)	217	14.7166	Fructose (furanose)	in CDI paper
Metabolite-2126	negative	-3.32978	0.060785	73.0_13.792842	73	13.7928	cyclooctene???	NIST thinks cyclooctene? Ion ratios seem wrong
Metabolite-860	negative	-3.18453	0.0608066	.beta.-L-(-)-Fucopyranose, 4TMS derivative	204	13.4235	Hexose, maybe rhamnose	NIST match, sugars are hard to ID
Metabolite-1216	negative	-3.06508	0.0608066	217.0_21.89675	217	21.8968	disaccharide, probably lactulose	NIST match, lactulose significantly better than others
Metabolite-883	negative	-2.81795	0.137461	D-(+)-Galactopyranose, 5TMS derivative (isomer 1)	204	15.5566	hexose, maybe glucose?	NIST match, sugars are hard to ID
Metabolite-1112	negative	-2.58302	0.060785	Lithocholic acid, 2TMS derivative	215	24.7955	delta-2-cholenoic acid	indirect comparison to pure standards
Metabolite-918	negative	-2.36982	0.0998132	Galactinol, nonakis(trimethylsilyl) ether 18.975677	204	18.9757	hexose, maybe talose?	NIST match, sugars are hard to ID
Metabolite-2057	negative	-2.1037	0.138846	73.0_10.404666	73	10.4047	???	best (wrong) match is dihydrouracil
Metabolite-2141	negative	-2.02863	0.141021	73.0_14.526803	73	14.5268	hexose, maybe myo-inositol?	NIST match, sugars are hard to ID
Metabolite-2264	negative	-1.90162	0.171799	D-(+)-Cellobiose, octakis(trimethylsilyl) ether, methyloxime (isomer 1)	73	22.0668	disaccharide, maybe lactulose?	actually seems to be 2nd half of M1216 huge peak
Metabolite-926	negative	-1.87688	0.0819504	204.0_19.453064	204	19.4531	Glyceryl glycoside	in CDI paper
Metabolite-2115	negative	-1.78813	0.237717	73.0_13.226279	73	13.2263	???	no good matches
Metabolite-2366	negative	-1.77877	0.189493	73.0_7.404255	73	7.40426	???	no good matches
Metabolite-881	negative	-1.71737	0.150828	204.0_15.293499	204	15.2935	hexose, maybe fructose? (pyranose)	NIST match, sugars are hard to ID
Metabolite-1304	positive	1.5407	0.150828	221.0_21.463757	221	21.4638	contaminant	high
Metabolite-2347	positive	1.6496	0.22617	73.0_5.3089695	73	5.30897	???	best (wrong) match is ethylene glycol
Metabolite-229	positive	1.88108	0.218787	129.0_6.781155	129	6.78116	???	no good matches
Metabolite-2450	positive	2.30464	0.150828	75.0_8.261541	75	8.26154	cinnamyl alcohol???	poor match, could also be 3-acetoxybutyric acid
Metabolite-2011	positive	2.31532	0.141021	67.0_20.16881	67	20.1688	Eicosatrienoic acid	in CDI paper
Metabolite-1826	positive	2.35852	0.139969	11-Octadecenoic acid, (E)-, TMS derivative 18.765652	339	18.7657	octadecenoic acid	NIST match, could be 13-, 11-, or 9- isomers
Metabolite-667	positive	2.50794	0.060785	Tyrosol, 2TMS derivative	179	12.0559	Tyrosol	in CDI paper
Metabolite-2076	positive	2.56035	0.20957	73.0_11.503168	73	11.5032	1,2,3-butanetriol??	poor match, could also be glycerol
Metabolite-585	positive	2.59548	0.179854	174.0_12.710225	174	12.7102	5-amino-valeric acid	matches NIST library
Metabolite-2462	positive	2.60896	0.150828	Arachidonic acid, TMS derivative	79	19.9874	arachidonic acid	solid NIST match
Metabolite-49	positive	2.60926	0.153073	104.0_10.147427	104	10.1474	benzenepropanoic acid	solid NIST match
Metabolite-2380	positive	3.08102	0.060785	Cyclohexasiloxane, dodecamethyl-	73	8.50807	contaminant	high
Metabolite-509	positive	3.11157	0.0940354	165.0_6.3923593	165	6.39236	para-cresol	solid NIST match, might be meta-cresol instead
Metabolite-843	positive	3.2973	0.060785	202.0_16.291899	202	16.2919	indole-3-acetic acid	matches NIST library
Metabolite-136	positive	3.33153	0.0819504	11-Octadecenoic acid, (E)-, TMS derivative	117	18.6951	oleic acid	NIST match, could also be the trans version, but unlikely
Metabolite-2103	positive	3.58227	0.060785	73.0_12.855416	73	12.8554	4-OH-phenylacetic acid	solid NIST match
Metabolite-564	positive	4.32423	0.053546	4-Methylvaleric acid, TMS derivative 4.7139835	173	4.71398	4-methylpentanoic acid	pure standards checked

## Sheet: ID status
Status	Count
total unknown	5
weak NIST match	4
NIST matched sugar	9
solid NIST match	11
bona fide standards	2
contaminants	2
Total	33

## Sheet: Standards Needed
ID	Possible identities		Product	Link	Price
M2167	sorbitol, mannitol, (glucitol is sorbitol)		D-sorbitol	S7547-250G	29		Minimum ~10 mg for mass spectrometry.
M1149	fructose		D-mannitol	M4125-10MG	16.5
M860	rhamnose, fucose		D-fructose	already have
M1216	lactulose		L-rhamnose	R3875-10MG	18.1
M883	glucose, mannose, galactose		L-fucose	F2252-10MG	27.7
M918	talose, allofuranose		lactulose	PHR1608-1G	75.8
M2141	myo-inositol		glucose	already have
M2264	lactulose		mannose	already have
M881	fructose, sorbose		D-galactose	G0750-10MG	15.7
			D-talose	86265-250MG	236
			allofuranose	not easily available
			myo-inositol	I5125-10MG	23.6
			L-sorbose	85541-50G	140
				Total	582.4
					206.4
