# Supplementary material for: Multi-omics investigation of Clostridioides difficile-colonized patients reveals pathogen and commensal correlates of C. difficile pathogenesis
Source: eLife. 2022 Jan 27;11:e72801. doi: 10.7554/eLife.72801 (PMC8794467; doi:10.7554/eLife.72801)
Supplement: Supplementary file 4. [file elife-72801-supp4.xlsx]

## Sheet: TY_TY-fructose DEseq
Gene	baseMean	log2FoldChange	lfcSE	stat	pvalue	padj	Gene Annotation	Protein accession
UAB_RS0212935	106849	4.93242	0.0981448	50.2566	0	0	4-hydroxybutyryl-CoA dehydratase/vinylacetyl-CoA-Delta-isomerase	WP_003430738.1
UAB_RS0212940	69766.2	4.90293	0.121231	40.443	0	0	aldehyde dehydrogenase family protein	WP_004454646.1
UAB_RS0212925	65708.1	4.81829	0.107067	45.0025	0	0	acetyl-CoA hydrolase/transferase family protein	WP_009903150.1
UAB_RS0212920	53539.9	4.62143	0.0905134	51.0579	0	0	4-hydroxybutyrate dehydrogenase	WP_009903149.1
UAB_RS0212945	52926.9	4.51467	0.107082	42.1607	0	0	acetyl-CoA hydrolase/transferase family protein	WP_004454647.1
UAB_RS0216115	43724.4	4.50691	0.114505	39.3599	0	0	transcription antiterminator	WP_003439865.1
UAB_RS0212950	30735.4	4.00859	0.0944376	42.447	0	0	membrane protein	WP_003430743.1
UAB_RS0212975	23783.4	6.91932	0.140697	49.1788	0	0	ketoacyl-ACP synthase III family protein	WP_009897537.1
UAB_RS0212970	16719	6.27071	0.136587	45.9099	0	0	glycine/betaine reductase C	WP_009903155.1
UAB_RS0213010	12723.8	6.59258	0.172436	38.232	0	0	thioredoxin-disulfide reductase	WP_003416869.1
UAB_RS0216110	9249.22	4.49046	0.115441	38.8985	0	0	PTS sugar transporter subunit IIA	WP_003431991.1
UAB_RS0213005	4478.54	7.0113	0.181724	38.5821	0	0	thiol reductase thioredoxin	WP_003416870.1
UAB_RS0213015	3000.49	5.29176	0.136323	38.8177	0	0	GrdX family protein	WP_009903157.1
UAB_RS0212550	8026.81	-6.73217	0.154231	-43.6498	0	0	1-phosphofructokinase	WP_003440256.1
UAB_RS0216100	44564.3	4.58113	0.128721	35.5896	2.03e-277	5.03e-275	PTS fructose transporter subunit IIC	WP_009891322.1
UAB_RS0216105	4679.19	4.5349	0.141167	32.1244	2.01e-226	4.68e-224	PTS fructose transporter subunit IIB	WP_003422575.1
UAB_RS0213150	4112.3	3.10597	0.0975403	31.8429	1.65e-222	3.61e-220	aminotransferase class I/II-fold pyridoxal phosphate-dependent enzyme	WP_004454678.1
UAB_RS0216095	108991	4.28178	0.135022	31.7118	1.07e-220	2.21e-218	glycosyl hydrolase	WP_009903397.1
UAB_RS0212930	4011.8	4.72919	0.150721	31.3771	4.16e-216	8.15e-214	hypothetical protein	WP_003430736.1
UAB_RS0217185	79992.4	-2.77264	0.0891577	-31.0981	2.55e-212	4.75e-210	type I glyceraldehyde-3-phosphate dehydrogenase	WP_003421962.1
UAB_RS0201410	18457.4	2.92145	0.0965222	30.2671	3.1e-201	5.5e-199	phosphate butyryltransferase	WP_003420701.1
UAB_RS0201440	57721.4	2.40751	0.0810046	29.7206	4.16e-194	7.04e-192	2-oxoacid:acceptor oxidoreductase family protein	WP_003420711.1
UAB_RS0201420	23793.6	2.62529	0.0917641	28.6092	5.17e-180	8.36e-178	hypothetical protein	WP_003420704.1
UAB_RS0217190	30660.1	-2.60971	0.0917294	-28.4501	4.87e-178	7.55e-176	transcriptional regulator	WP_003429564.1
UAB_RS0201430	55340.8	2.58781	0.091312	28.3403	1.1e-176	1.64e-174	3-methyl-2-oxobutanoate dehydrogenase subunit VorB	WP_003432442.1
UAB_RS0213145	4813.15	3.38996	0.120476	28.138	3.36e-174	4.81e-172	4Fe-4S binding protein	WP_009903167.1
UAB_RS0213000	32188	7.2627	0.268133	27.0862	1.43e-161	1.97e-159	glycine/sarcosine/betaine reductase component B subunit	WP_003416871.1
UAB_RS0215705	1322.27	4.06283	0.154178	26.3516	4.92e-153	6.54e-151	UxaA family hydrolase	WP_009898047.1
UAB_RS0201435	57814	2.38153	0.0924978	25.7469	3.49e-146	4.48e-144	MFS transporter	WP_003420710.1
UAB_RS0215695	962.799	4.67643	0.185257	25.2429	1.36e-140	1.68e-138	2-keto-3-deoxygluconate permease	WP_009893742.1
UAB_RS0203470	13478	2.49236	0.0999214	24.9432	2.53e-137	3.04e-135	helix-turn-helix transcriptional regulator	WP_009901923.1
UAB_RS0201415	16767.9	3.04592	0.123727	24.6181	8.09e-134	9.41e-132	butyrate kinase	WP_003420702.1
UAB_RS0212990	8170.3	7.32397	0.30081	24.3475	6.16e-131	6.95e-129	glycine/betaine reductase A	WP_011861535.1
UAB_RS0203500	6881.95	-2.04398	0.0893888	-22.8662	1.01e-115	1.1e-113	response regulator transcription factor	WP_009901935.1
UAB_RS0204715	11938.3	2.10175	0.0925566	22.7077	3.76e-114	4e-112	anaerobic carbon-monoxide dehydrogenase catalytic subunit	WP_009902118.1
UAB_RS0203495	9772.14	-2.10896	0.093685	-22.5112	3.22e-112	3.33e-110	HAMP domain-containing histidine kinase	WP_009901933.1
UAB_RS0203475	14612	2.70047	0.121082	22.3028	3.47e-110	3.49e-108	AAA family ATPase	WP_009901925.1
UAB_RS0216180	56141.8	1.91573	0.0863352	22.1894	4.35e-109	4.26e-107	PTS transporter subunit EIIC	WP_009903415.1
UAB_RS0204725	2052.07	2.67424	0.121893	21.9392	1.1e-106	1.05e-104	AAA family ATPase	WP_009888532.1
UAB_RS0208725	6048.22	-2.24105	0.105651	-21.2118	7.43e-100	6.92e-98	amino acid permease	WP_009896511.1
UAB_RS0216170	22657.5	1.90113	0.0898482	21.1594	2.26e-99	2.05e-97	SIS domain-containing protein	WP_009903412.1
UAB_RS0216175	29928.7	2.02138	0.0955975	21.1447	3.09e-99	2.73e-97	PatB family C-S lyase	WP_009903414.1
UAB_RS0200860	2369.76	2.92095	0.138237	21.13	4.22e-99	3.65e-97	0	WP_009901543.1
UAB_RS0207190	50635.6	1.81198	0.0861791	21.0257	3.82e-98	3.23e-96	branched-chain amino acid transport system II carrier protein	WP_009902388.1
UAB_RS0202025	108555	1.74317	0.0834537	20.8878	6.91e-97	5.71e-95	NAD-specific glutamate dehydrogenase	WP_003420866.1
UAB_RS0213990	14584.3	-2.10717	0.105631	-19.9484	1.55e-88	1.25e-86	cation:dicarboxylase symporter family transporter	WP_009903244.1
UAB_RS0213140	1201.11	3.11829	0.158322	19.6959	2.34e-86	1.85e-84	indolepyruvate oxidoreductase subunit beta	WP_003430806.1
UAB_RS0205335	2796.03	1.87621	0.0968057	19.3812	1.11e-83	8.62e-82	fumarylacetoacetate hydrolase family protein	WP_009888650.1
UAB_RS0204940	5998.44	-2.33181	0.120494	-19.3521	1.96e-83	1.49e-81	pyruvate formate lyase-activating protein	WP_003437451.1
UAB_RS0217165	70513	-1.72811	0.0902538	-19.1472	1.02e-81	7.6e-80	phosphopyruvate hydratase	WP_009898301.1
UAB_RS0211750	22133.4	-1.65568	0.0876372	-18.8925	1.31e-79	9.6e-78	translational GTPase TypA	WP_003430621.1
UAB_RS0215805	2451.02	2.33825	0.12543	18.6419	1.47e-77	1.05e-75	V-type ATP synthase subunit B	WP_003422669.1
UAB_RS0214840	11635.1	-2.19926	0.118024	-18.6341	1.7e-77	1.19e-75	NCS2 family permease	WP_003421552.1
UAB_RS0213695	1526.07	2.55382	0.1372	18.6138	2.48e-77	1.71e-75	PTS fructose transporter subunit IIC	WP_004454776.1
UAB_RS0203465	33028	1.71742	0.0935224	18.3638	2.56e-75	1.73e-73	GntR family transcriptional regulator	WP_009901921.1
UAB_RS02000000220160	6429.17	-1.56853	0.0875177	-17.9224	7.88e-72	5.24e-70	transposase	WP_009901937.1
UAB_RS0201425	4072.46	2.41529	0.135281	17.8538	2.7e-71	1.76e-69	4Fe-4S binding protein	WP_003420706.1
UAB_RS0215835	2530.2	2.41033	0.140042	17.2115	2.18e-66	1.4e-64	V-type ATP synthase subunit I	WP_009898067.1
UAB_RS0215830	539.455	2.99571	0.178921	16.7432	6.34e-63	4e-61	V-type ATP synthase subunit K	WP_003422657.1
UAB_RS0212540	1115.55	-1.83853	0.110405	-16.6526	2.9e-62	1.8e-60	FAD-dependent oxidoreductase	WP_009903120.1
UAB_RS0210235	1587.23	1.64946	0.0993805	16.5974	7.28e-62	4.44e-60	FAD-dependent oxidoreductase	WP_003439500.1
UAB_RS0204945	177304	-1.77661	0.107588	-16.5132	2.95e-61	1.77e-59	formate C-acetyltransferase	WP_009902143.1
UAB_RS0215810	2173.24	2.52524	0.153276	16.4751	5.54e-61	3.27e-59	V-type ATP synthase subunit A	WP_003426762.1
UAB_RS0204405	21041.7	1.69032	0.103663	16.3058	8.97e-60	5.22e-58	glycosylating toxin TcdA	WP_009902072.1
UAB_RS0205425	8607.72	1.26844	0.0810672	15.6468	3.49e-55	2e-53	ABC transporter ATP-binding protein	WP_004454205.1
UAB_RS0205415	21586.2	1.33222	0.0856095	15.5615	1.33e-54	7.49e-53	ABC transporter substrate-binding protein	WP_009902200.1
UAB_RS0206325	32348.9	1.66304	0.108222	15.3669	2.73e-53	1.52e-51	electron transport complex subunit RsxC	WP_003428488.1
UAB_RS0215480	1323.11	1.96879	0.128372	15.3366	4.35e-53	2.38e-51	pyridoxal phosphate-dependent aminotransferase	WP_003436139.1
UAB_RS0213710	685.792	2.58484	0.168626	15.3289	4.9e-53	2.64e-51	transcription antiterminator	WP_009897679.1
UAB_RS0215820	1065.47	2.57016	0.169867	15.1304	1.02e-51	5.43e-50	V-type ATP synthase subunit C	WP_003439726.1
UAB_RS0203125	488395	1.40759	0.093513	15.0524	3.33e-51	1.75e-49	electron transfer flavoprotein subunit alpha/FixB family protein	WP_003417347.1
UAB_RS0205420	6021.08	1.29076	0.087474	14.7559	2.82e-49	1.46e-47	ABC transporter ATP-binding protein	WP_004454207.1
UAB_RS0217170	36143	-1.55759	0.105831	-14.7177	4.96e-49	2.53e-47	2,3-bisphosphoglycerate-independent phosphoglycerate mutase	WP_025992040.1
UAB_RS0204710	8443.06	1.2626	0.0863777	14.6172	2.18e-48	1.1e-46	bifunctional enoyl-CoA hydratase/phosphate acetyltransferase	WP_003436909.1
UAB_RS0203095	277898	1.65055	0.113033	14.6024	2.71e-48	1.35e-46	isocaprenoyl-CoA:2-hydroxyisocaproate CoA-transferase HadA	WP_003427766.1
UAB_RS0217180	15428.7	-1.84954	0.127129	-14.5485	5.97e-48	2.88e-46	phosphoglycerate kinase	WP_003429565.1
UAB_RS0211045	3071.75	-1.4425	0.0991488	-14.5488	5.94e-48	2.88e-46	tRNA (N6-isopentenyl adenosine(37)-C2)-methylthiotransferase MiaB	WP_003435252.1
UAB_RS0206340	9122.33	1.73357	0.121003	14.3267	1.49e-46	7.11e-45	electron transport complex subunit E	WP_003419045.1
UAB_RS0216210	23141.1	-1.2078	0.0844987	-14.2937	2.39e-46	1.13e-44	peptide MFS transporter	WP_009903419.1
UAB_RS0206335	8286.55	1.63888	0.115068	14.2428	4.97e-46	2.31e-44	RnfABCDGE type electron transport complex subunit G	WP_009902280.1
UAB_RS0205460	2369.58	1.72499	0.122211	14.1149	3.08e-45	1.41e-43	protein-ADP-ribose hydrolase	WP_012816064.1
UAB_RS0215800	771.699	2.14076	0.151706	14.1112	3.24e-45	1.47e-43	V-type ATP synthase subunit D	WP_009903358.1
UAB_RS0206500	1045.72	1.74906	0.124373	14.063	6.41e-45	2.87e-43	FAD-binding protein	WP_003438092.1
UAB_RS0206345	7353.27	1.68593	0.119911	14.0599	6.7e-45	2.97e-43	electron transport complex subunit RsxA	WP_003419046.1
UAB_RS0206350	24784.1	1.58772	0.113542	13.9835	1.96e-44	8.6e-43	RnfABCDGE type electron transport complex subunit B	WP_003428486.1
UAB_RS0203120	296273	1.54246	0.110315	13.9823	2e-44	8.65e-43	electron transfer flavoprotein subunit beta/FixA family protein	WP_003427760.1
UAB_RS0204780	9278.91	1.33987	0.098028	13.6682	1.57e-42	6.73e-41	CO dehydrogenase/CO-methylating acetyl-CoA synthase complex subunit beta	WP_003418359.1
UAB_RS0216390	9037.86	-1.29976	0.095644	-13.5896	4.62e-42	1.95e-40	ECF transporter S component	WP_009903437.1
UAB_RS2000000221400	2274.92	1.62418	0.119659	13.5734	5.76e-42	2.41e-40	aminomethyl-transferring glycine dehydrogenase subunit GcvPA	WP_004454507.1
UAB_RS0214545	75372.7	-1.21085	0.0896609	-13.5048	1.47e-41	6.06e-40	sugar ABC transporter substrate-binding protein	WP_004454961.1
UAB_RS0213700	288.106	2.68842	0.199318	13.4881	1.84e-41	7.52e-40	PTS fructose transporter subunit IIB	WP_003416512.1
UAB_RS0214670	7911.37	-1.3793	0.102392	-13.4708	2.32e-41	9.4e-40	ABC transporter ATP-binding protein	WP_009897854.1
UAB_RS0215815	359.37	2.53837	0.188825	13.443	3.39e-41	1.35e-39	V-type ATP synthase subunit F	WP_003422665.1
UAB_RS0214845	3227.75	-1.48225	0.11043	-13.4225	4.46e-41	1.77e-39	amidohydrolase	WP_009897881.1
UAB_RS0211975	4558.26	1.14505	0.0855636	13.3825	7.66e-41	3e-39	aminotransferase class III-fold pyridoxal phosphate-dependent enzyme	WP_003430579.1
UAB_RS0216165	10948.3	1.80279	0.135773	13.278	3.11e-40	1.2e-38	PTS glucose transporter subunit IIA	WP_025992035.1
UAB_RS0203110	235398	1.75153	0.13218	13.2511	4.44e-40	1.71e-38	(R)-2-hydroxyisocaproyl-CoA dehydratase subunit beta	WP_003427763.1
UAB_RS0207155	11050.7	-1.22873	0.0927942	-13.2414	5.06e-40	1.92e-38	30S ribosomal protein S16	WP_003419338.1
UAB_RS0214660	30749.6	-1.2915	0.0977522	-13.212	7.48e-40	2.81e-38	sodium:proton antiporter	WP_009897846.1
UAB_RS0202985	27537.2	1.32721	0.101145	13.1218	2.47e-39	9.2e-38	DUF4132 domain-containing protein	WP_009901788.1
UAB_RS0219765	9270.17	-1.50002	0.114701	-13.0776	4.42e-39	1.63e-37	50S ribosomal protein L34	WP_003420485.1
UAB_RS0205575	2558.15	-1.40316	0.10758	-13.0429	6.97e-39	2.54e-37	agmatinase	WP_009888724.1
UAB_RS0211665	2752.47	-1.98591	0.152817	-12.9954	1.3e-38	4.7e-37	cation:proton antiporter	WP_003433135.1
UAB_RS0215825	655.238	2.78846	0.215935	12.9134	3.78e-38	1.35e-36	V-type ATP synthase subunit E	WP_003422659.1
UAB_RS0214665	8923.88	-1.23262	0.0957811	-12.8692	6.71e-38	2.38e-36	dipeptide ABC transporter ATP-binding protein	WP_003427052.1
UAB_RS0202005	4706.21	1.65109	0.128328	12.8662	6.98e-38	2.45e-36	4Fe-4S dicluster domain-containing protein	WP_009888020.1
UAB_RS0205285	32763.1	1.29602	0.101915	12.7166	4.78e-37	1.66e-35	membrane protein	WP_004454238.1
UAB_RS0207715	4773.29	2.04673	0.161141	12.7015	5.8e-37	2e-35	phage tail sheath subtilisin-like domain-containing protein	WP_003438414.1
UAB_RS0218135	3588.81	-1.20227	0.0948612	-12.674	8.24e-37	2.81e-35	hypothetical protein	WP_003437274.1
UAB_RS0216380	1355.15	1.29269	0.102079	12.6637	9.4e-37	3.18e-35	glycosyl hydrolase	WP_003439934.1
UAB_RS0202000	67044.8	1.59793	0.126255	12.6564	1.03e-36	3.46e-35	anaerobic carbon-monoxide dehydrogenase catalytic subunit	WP_009888019.1
UAB_RS0212030	5560.98	1.17087	0.0925268	12.6544	1.06e-36	3.52e-35	hydroxylamine reductase	WP_003433949.1
UAB_RS0201305	766.608	-1.96313	0.155266	-12.6437	1.21e-36	3.99e-35	0	WP_003435644.1
UAB_RS0214630	7959.62	-1.36308	0.108238	-12.5934	2.3e-36	7.5e-35	redox-regulated ATPase YchF	WP_003427022.1
UAB_RS0201500	8927.34	-1.24527	0.0992127	-12.5515	3.9e-36	1.26e-34	methionine adenosyltransferase	WP_003432462.1
UAB_RS0217565	3950.4	1.25808	0.100261	12.548	4.08e-36	1.31e-34	TSUP family transporter	WP_009891694.1
UAB_RS0211495	18439.9	-1.18771	0.0947345	-12.5373	4.67e-36	1.48e-34	ATP-binding cassette domain-containing protein	WP_003429004.1
UAB_RS0203105	258587	1.79167	0.143618	12.4753	1.02e-35	3.21e-34	(R)-2-hydroxyisocaproyl-CoA dehydratase subunit HadB	WP_009901809.1
UAB_RS0207180	2007.41	-1.29023	0.103624	-12.4511	1.38e-35	4.31e-34	ribosome biogenesis GTPase YlqF	WP_003438227.1
UAB_RS0214685	12770.5	-1.23032	0.0992096	-12.4012	2.57e-35	7.99e-34	ABC transporter permease	WP_009897856.1
UAB_RS0201070	78234.8	-1.15269	0.0931199	-12.3786	3.41e-35	1.05e-33	0	WP_003421187.1
UAB_RS0210860	3108.49	-1.66987	0.134991	-12.3702	3.79e-35	1.16e-33	YitT family protein	WP_003435320.1
UAB_RS0214020	18123.8	-1.05638	0.0856461	-12.3342	5.93e-35	1.79e-33	DUF4091 domain-containing protein	WP_009903252.1
UAB_RS0202990	2306.97	1.18263	0.0964778	12.2581	1.52e-34	4.57e-33	hypothetical protein	WP_003434832.1
UAB_RS0205275	2474.48	1.30721	0.106852	12.2338	2.05e-34	6.11e-33	alpha-hydroxy-acid oxidizing protein	WP_009895854.1
UAB_RS0218795	17794.5	-0.947663	0.0774741	-12.232	2.1e-34	6.2e-33	nucleoside triphosphate pyrophosphohydrolase	WP_009903796.1
UAB_RS0202010	41205.2	1.57576	0.12917	12.1991	3.14e-34	9.21e-33	NAD(P)/FAD-dependent oxidoreductase	WP_009892576.1
UAB_RS0206330	14662.7	1.62184	0.133106	12.1846	3.76e-34	1.09e-32	RnfABCDGE type electron transport complex subunit D	WP_003428487.1
UAB_RS0218265	31860.4	-1.27479	0.104655	-12.1809	3.93e-34	1.13e-32	pyruvate kinase	WP_009903738.1
UAB_RS0218800	11620.7	-1.06061	0.088177	-12.0282	2.53e-33	7.23e-32	polysaccharide biosynthesis protein	WP_003425909.1
UAB_RS0204765	3814.17	1.58935	0.132355	12.0082	3.22e-33	9.14e-32	acetyl-CoA decarbonylase/synthase complex subunit delta	WP_003432254.1
UAB_RS0205545	3550.79	1.46542	0.122644	11.9486	6.6e-33	1.86e-31	glycogen/starch/alpha-glucan phosphorylase	WP_009895917.1
UAB_RS0219670	46792.7	-1.19133	0.0997241	-11.9463	6.79e-33	1.9e-31	single-stranded DNA-binding protein	WP_003420524.1
UAB_RS0205535	897.432	1.85938	0.155845	11.931	8.16e-33	2.27e-31	glucose-1-phosphate adenylyltransferase subunit GlgD	WP_003418641.1
UAB_RS0203115	309615	1.71328	0.14396	11.901	1.17e-32	3.22e-31	acyl-CoA dehydrogenase family protein	WP_003427762.1
UAB_RS0204770	4700.12	1.65435	0.139643	11.847	2.23e-32	6.1e-31	acetyl-CoA decarbonylase/synthase complex subunit gamma	WP_009902124.1
UAB_RS0206505	1269.47	1.36027	0.115076	11.8207	3.05e-32	8.29e-31	FAD-binding oxidoreductase	WP_009902289.1
UAB_RS0203100	130696	1.82154	0.154174	11.8148	3.27e-32	8.83e-31	2-hydroxyisocaproyl-CoA dehydratase activator HadI	WP_009888223.1
UAB_RS0217920	14803.2	1.24229	0.105265	11.8016	3.83e-32	1.03e-30	glycyl radical protein	WP_009903701.1
UAB_RS0206450	26494.4	-1.1094	0.0941086	-11.7885	4.47e-32	1.19e-30	ribosomal-processing cysteine protease Prp	WP_003438074.1
UAB_RS0207175	35758.1	-1.24649	0.106021	-11.757	6.5e-32	1.72e-30	50S ribosomal protein L19	WP_003419350.1
UAB_RS0204735	2821.92	1.37486	0.11695	11.7559	6.58e-32	1.73e-30	cyclodeaminase/cyclohydrolase family protein	WP_003432265.1
UAB_RS0204755	5176.43	1.60473	0.136695	11.7395	8e-32	2.08e-30	dihydrolipoyl dehydrogenase	WP_003436922.1
UAB_RS0204740	3431.65	1.43766	0.122495	11.7365	8.29e-32	2.14e-30	bifunctional 5,10-methylene-tetrahydrofolate dehydrogenase/5,10-methylene-tetrahydrofolate cyclohydrolase	WP_009902122.1
UAB_RS0205710	8460.69	1.30893	0.111653	11.7232	9.69e-32	2.49e-30	alanine--glyoxylate aminotransferase family protein	WP_009888750.1
UAB_RS0210230	730.771	1.58915	0.13566	11.7142	1.08e-31	2.75e-30	4Fe-4S-binding domain protein	WP_003430299.1
UAB_RS0208620	14133.3	1.03353	0.0882743	11.7082	1.16e-31	2.93e-30	sulfide/dihydroorotate dehydrogenase-like FAD/NAD-binding protein	WP_009896496.1
UAB_RS0207760	2124.14	2.21107	0.189231	11.6845	1.53e-31	3.85e-30	baseplate J/gp47 family protein	WP_009902437.1
UAB_RS0218700	8099.96	-0.983066	0.0843199	-11.6588	2.07e-31	5.17e-30	uracil phosphoribosyltransferase	WP_003437840.1
UAB_RS0219745	6162.7	-0.995283	0.0854747	-11.6442	2.46e-31	6.1e-30	protein jag	WP_003434235.1
UAB_RS0203610	2567.68	1.53496	0.131832	11.6433	2.48e-31	6.12e-30	hypothetical protein	WP_009901962.1
UAB_RS0205530	1024.51	1.67137	0.143862	11.6179	3.34e-31	8.18e-30	glucose-1-phosphate adenylyltransferase	WP_003418638.1
UAB_RS0219755	1238.86	-1.21064	0.10439	-11.5972	4.26e-31	1.04e-29	membrane protein insertion efficiency factor YidD	WP_003434233.1
UAB_RS0217940	12883.6	-1.06999	0.0923459	-11.5868	4.81e-31	1.16e-29	Na/Pi cotransporter family protein	WP_009898459.1
UAB_RS0204790	1164.45	1.64291	0.141859	11.5813	5.13e-31	1.23e-29	DUF4445 domain-containing protein	WP_003436926.1
UAB_RS0212880	6548.42	-1.0134	0.0875424	-11.5761	5.45e-31	1.3e-29	xanthine phosphoribosyltransferase	WP_004454633.1
UAB_RS0201065	100112	-0.998068	0.086251	-11.5717	5.74e-31	1.36e-29	0	WP_003421188.1
UAB_RS0213135	4866.82	1.22496	0.105921	11.5649	6.21e-31	1.46e-29	butyrate kinase	WP_004454677.1
UAB_RS0218900	15401.7	-1.22192	0.106025	-11.5248	9.9e-31	2.32e-29	UDP-N-acetylmuramate--L-alanine ligase	WP_003425936.1
UAB_RS0219675	42040.6	-1.18163	0.102608	-11.516	1.1e-30	2.55e-29	30S ribosomal protein S6	WP_003420522.1
UAB_RS0217175	10147.5	-1.59273	0.138787	-11.4761	1.74e-30	4.02e-29	triose-phosphate isomerase	WP_003434148.1
UAB_RS0205070	4401.68	-1.16039	0.101199	-11.4664	1.94e-30	4.47e-29	ABC-F family ATP-binding cassette domain-containing protein	WP_009902156.1
UAB_RS0209275	785.2	1.4226	0.124146	11.459	2.12e-30	4.84e-29	PepSY domain-containing protein	WP_009902665.1
UAB_RS0213600	12584	-0.994263	0.0868976	-11.4418	2.59e-30	5.87e-29	elongation factor 4	WP_003416556.1
UAB_RS0212405	510.905	1.71813	0.150242	11.4357	2.77e-30	6.25e-29	sodium:solute symporter	WP_009903103.1
UAB_RS0205570	2349.39	-1.33196	0.116967	-11.3875	4.83e-30	1.08e-28	polyamine aminopropyltransferase	WP_009888722.1
UAB_RS0202995	615.244	-1.40443	0.123906	-11.3347	8.83e-30	1.97e-28	hypothetical protein	WP_003417301.1
UAB_RS0208290	8802.63	-1.20874	0.10679	-11.3189	1.06e-29	2.34e-28	YhgE/Pip domain-containing protein	WP_003438668.1
UAB_RS0201300	44403.1	-1.24314	0.110016	-11.2996	1.32e-29	2.9e-28	0	WP_003421105.1
UAB_RS0218620	7563.93	1.00814	0.0894953	11.2648	1.96e-29	4.29e-28	alanine racemase	WP_009903781.1
UAB_RS0206520	26629.5	-1.19268	0.106191	-11.2315	2.86e-29	6.22e-28	DUF177 domain-containing protein	WP_003419111.1
UAB_RS0207740	1431.31	2.22284	0.197948	11.2294	2.92e-29	6.33e-28	hypothetical protein	WP_003428168.1
UAB_RS0211290	7507.22	-1.02522	0.0917371	-11.1757	5.36e-29	1.15e-27	DUF4878 domain-containing protein	WP_009902950.1
UAB_RS0213865	1340.36	1.12321	0.100506	11.1756	5.37e-29	1.15e-27	cell wall-binding protein Cwp29	WP_009903221.1
UAB_RS0216555	16324.9	-0.873062	0.0783276	-11.1463	7.47e-29	1.59e-27	M20 family metallopeptidase	WP_009903471.1
UAB_RS0205715	3133.82	2.05152	0.18484	11.0989	1.27e-28	2.69e-27	D-3-phosphoglycerate dehydrogenase	WP_003437082.1
UAB_RS0214300	7199.61	-1.85524	0.167216	-11.0949	1.33e-28	2.79e-27	carbon starvation protein A	WP_004454919.1
UAB_RS0210085	1049.25	1.98653	0.179079	11.0931	1.36e-28	2.83e-27	type I glyceraldehyde-3-phosphate dehydrogenase	WP_003430259.1
UAB_RS0205540	2136.34	1.37857	0.124345	11.0867	1.46e-28	3.03e-27	glycogen synthase GlgA	WP_003437171.1
UAB_RS0211910	11634.8	-1.31646	0.118783	-11.0828	1.52e-28	3.14e-27	mannonate oxidoreductase	WP_009903043.1
UAB_RS0202305	475.964	-1.49635	0.135118	-11.0743	1.67e-28	3.44e-27	HAD family hydrolase	WP_009901731.1
UAB_RS0204775	3513.51	1.4705	0.133106	11.0476	2.25e-28	4.6e-27	dihydropteroate synthase	WP_003418356.1
UAB_RS0216125	20508.5	-1.07064	0.0969417	-11.0442	2.34e-28	4.76e-27	C-GCAxxG-C-C family protein	WP_009903399.1
UAB_RS0216120	931.297	1.4537	0.131718	11.0365	2.55e-28	5.16e-27	glucose uptake protein	WP_009891331.1
UAB_RS0212455	1311.96	1.25762	0.114173	11.015	3.23e-28	6.51e-27	VWA domain-containing protein	WP_009903109.1
UAB_RS0207720	2614.63	2.05401	0.18649	11.014	3.27e-28	6.51e-27	phage tail tube protein	WP_003419646.1
UAB_RS0207965	1575.5	-1.39131	0.12632	-11.0141	3.27e-28	6.51e-27	D-alanine--D-alanine ligase	WP_009902484.1
UAB_RS0213945	1767.18	1.03986	0.0948887	10.9587	6.04e-28	1.19e-26	alanine--glyoxylate aminotransferase family protein	WP_009903233.1
UAB_RS0216350	433.5	1.5591	0.142527	10.939	7.5e-28	1.48e-26	xylulokinase	WP_003431356.1
UAB_RS0203725	2306.56	1.30135	0.119132	10.9236	8.89e-28	1.74e-26	hypothetical protein	WP_003417884.1
UAB_RS0204960	296.228	2.67368	0.24515	10.9063	1.08e-27	2.1e-26	BglG family transcription antiterminator	WP_009902146.1
UAB_RS0204795	661.101	1.59303	0.146546	10.8705	1.59e-27	3.09e-26	radical SAM protein	WP_003436928.1
UAB_RS0215110	13979	-1.09263	0.100749	-10.8451	2.1e-27	4.06e-26	HPr family phosphocarrier protein	WP_003422895.1
UAB_RS0213295	16645	1.1527	0.106429	10.8306	2.46e-27	4.73e-26	pyruvate, phosphate dikinase	WP_009890612.1
UAB_RS0218260	2187.26	-1.25429	0.115821	-10.8295	2.49e-27	4.76e-26	23S rRNA (uracil(1939)-C(5))-methyltransferase RlmD	WP_009903736.1
UAB_RS0203730	4364.22	1.45582	0.134441	10.8287	2.52e-27	4.78e-26	DUF3100 domain-containing protein	WP_009901985.1
UAB_RS0205720	3676.27	1.72943	0.159914	10.8147	2.93e-27	5.54e-26	DUF1015 domain-containing protein	WP_003437079.1
UAB_RS0207710	2479.06	1.87323	0.173696	10.7845	4.07e-27	7.66e-26	hypothetical protein	WP_009902429.1
UAB_RS0200010	607.154	-1.72157	0.159803	-10.7731	4.61e-27	8.63e-26	0	0
UAB_RS0214795	4552.53	-1.02154	0.0948496	-10.7701	4.76e-27	8.87e-26	aspartate--ammonia ligase	WP_003427105.1
UAB_RS0205410	6052.73	1.15994	0.107716	10.7685	4.85e-27	8.98e-26	ABC transporter permease	WP_009902199.1
UAB_RS0212245	3701.36	-1.25684	0.116754	-10.7649	5.04e-27	9.29e-26	GTPase HflX	WP_011861493.1
UAB_RS0204955	13289.4	-1.04397	0.0969902	-10.7636	5.11e-27	9.37e-26	DEAD/DEAH box helicase	WP_003437464.1
UAB_RS0218895	2809.44	-1.11334	0.103665	-10.7398	6.62e-27	1.21e-25	pur operon repressor	WP_003425934.1
UAB_RS0213985	7321.4	-1.27067	0.118438	-10.7285	7.48e-27	1.36e-25	CoA-disulfide reductase	WP_009903243.1
UAB_RS0215160	12696.2	-1.03129	0.0966302	-10.6725	1.37e-26	2.47e-25	LCP family protein	WP_004454115.1
UAB_RS0218595	5081.11	0.996741	0.0935896	10.6501	1.74e-26	3.13e-25	hypothetical protein	WP_003437819.1
UAB_RS0216715	271.826	1.86394	0.175067	10.647	1.8e-26	3.22e-25	family 1 glycosylhydrolase	WP_009903499.1
UAB_RS0209355	14076.9	1.15568	0.108928	10.6096	2.69e-26	4.79e-25	YceG family protein	WP_004454528.1
UAB_RS0214680	14405.5	-1.10132	0.103979	-10.5918	3.25e-26	5.77e-25	ABC transporter permease	WP_009897855.1
UAB_RS0203720	12639.6	1.29022	0.121841	10.5894	3.34e-26	5.89e-25	amidohydrolase	WP_009888329.1
UAB_RS0209460	2051.03	1.18012	0.111892	10.5469	5.25e-26	9.22e-25	aminomethyl-transferring glycine dehydrogenase subunit GcvPB	WP_009902689.1
UAB_RS0210950	2767.52	1.00008	0.0949748	10.53	6.29e-26	1.1e-24	DUF554 domain-containing protein	WP_003435276.1
UAB_RS0217880	10746.2	-1.15624	0.109933	-10.5177	7.16e-26	1.25e-24	ferrous iron transport protein B	WP_009903695.1
UAB_RS0205465	1895.18	1.3168	0.12534	10.5059	8.12e-26	1.41e-24	alpha/beta hydrolase	WP_004454199.1
UAB_RS0212985	39463	2.85572	0.272865	10.4657	1.24e-25	2.14e-24	glycine reductase complex selenoprotein B	WP_011861534.1
UAB_RS0201295	58078	-1.17248	0.112823	-10.3921	2.69e-25	4.62e-24	0	WP_003421107.1
UAB_RS0210560	1266.07	1.2529	0.120696	10.3806	3.04e-25	5.19e-24	prolyl-tRNA synthetase associated domain-containing protein	WP_003428667.1
UAB_RS0217530	3247.43	-1.456	0.140381	-10.3717	3.33e-25	5.67e-24	hypoxanthine phosphoribosyltransferase	WP_009891688.1
UAB_RS0212460	1287.33	1.18302	0.114069	10.3711	3.36e-25	5.68e-24	MoxR family ATPase	WP_003433818.1
UAB_RS0205880	1748.22	-1.38062	0.133544	-10.3383	4.73e-25	7.96e-24	spermidine/putrescine ABC transporter substrate-binding protein	WP_003437013.1
UAB_RS0213525	1153	1.53412	0.148408	10.3372	4.79e-25	8.02e-24	DevR family CRISPR-associated autoregulator	WP_009903200.1
UAB_RS0212430	885.355	-1.1962	0.115915	-10.3197	5.74e-25	9.58e-24	GGDEF domain-containing protein	WP_009903107.1
UAB_RS0212535	189.427	-1.8664	0.18103	-10.3099	6.35e-25	1.06e-23	hypothetical protein	WP_003440252.1
UAB_RS0203575	1058.92	-1.2734	0.123601	-10.3025	6.86e-25	1.14e-23	HAMP domain-containing histidine kinase	WP_009901956.1
UAB_RS0217895	103.404	2.87643	0.279659	10.2855	8.19e-25	1.35e-23	PTS sugar transporter subunit IIC	WP_009903698.1
UAB_RS0217535	30060.5	0.885071	0.0860784	10.2822	8.48e-25	1.39e-23	serine dehydratase subunit alpha family protein	WP_004454042.1
UAB_RS0209350	42526.3	1.07599	0.105248	10.2234	1.56e-24	2.54e-23	calcium-translocating P-type ATPase, PMCA-type	WP_009893200.1
UAB_RS02000000220755	7946.69	1.11147	0.108813	10.2145	1.71e-24	2.78e-23	hypothetical protein	WP_009890506.1
UAB_RS0205290	978.531	-1.2717	0.124522	-10.2126	1.74e-24	2.82e-23	DEAD/DEAH box helicase	WP_009888643.1
UAB_RS0213660	1477.46	-1.3774	0.135046	-10.1995	1.99e-24	3.21e-23	tRNA threonylcarbamoyladenosine dehydratase	WP_004454770.1
UAB_RS0219345	420.843	-1.40365	0.137664	-10.1962	2.06e-24	3.31e-23	tRNA 2-thiocytidine biosynthesis protein TtcA	WP_009903833.1
UAB_RS0208130	2605.76	-0.937692	0.0920114	-10.191	2.17e-24	3.47e-23	LrgB family protein	WP_009902506.1
UAB_RS02000000220585	442.129	1.65605	0.162572	10.1866	2.28e-24	3.62e-23	hypothetical protein	WP_003428796.1
UAB_RS0219750	10213.6	-0.920851	0.0904626	-10.1794	2.45e-24	3.88e-23	membrane protein insertase YidC	WP_003429300.1
UAB_RS0218705	3543.54	-1.01631	0.100027	-10.1604	2.98e-24	4.7e-23	ribose 5-phosphate isomerase B	WP_003437841.1
UAB_RS0208500	1811.01	1.22517	0.1212	10.1086	5.06e-24	7.95e-23	3-methyl-2-oxobutanoate hydroxymethyltransferase	WP_009902544.1
UAB_RS0213265	3474.27	-0.982752	0.0972271	-10.1078	5.1e-24	7.98e-23	type IA DNA topoisomerase	WP_004454701.1
UAB_RS0216130	27664.3	-1.07818	0.106719	-10.103	5.36e-24	8.34e-23	TDT family transporter	WP_009903401.1
UAB_RS0219760	4240.83	-1.02014	0.101032	-10.0971	5.69e-24	8.82e-23	ribonuclease P protein component	WP_003429302.1
UAB_RS0219130	2052.85	-1.08692	0.107672	-10.0947	5.83e-24	9.01e-23	glutamate racemase	WP_003425992.1
UAB_RS0213635	1768.37	-1.12576	0.112468	-10.0096	1.38e-23	2.13e-22	DNA polymerase III subunit delta	WP_003430958.1
UAB_RS0206495	254.644	1.73435	0.173728	9.98311	1.81e-23	2.77e-22	electron transfer flavoprotein subunit beta/FixA family protein	WP_009902288.1
UAB_RS0202855	275.006	-1.86264	0.186884	-9.96682	2.13e-23	3.25e-22	DedA family protein	WP_009895382.1
UAB_RS0201075	45656.2	-1.25532	0.125999	-9.9629	2.21e-23	3.36e-22	0	WP_003421186.1
UAB_RS0216710	354.795	1.90487	0.191427	9.9509	2.5e-23	3.78e-22	glycoside hydrolase family 65 protein	WP_009903497.1
UAB_RS0202370	13213.2	1.14007	0.114728	9.93721	2.87e-23	4.32e-22	phosphoribosylformylglycinamidine synthase	WP_009901735.1
UAB_RS0218740	35458	-1.14441	0.11522	-9.93237	3.01e-23	4.52e-22	50S ribosomal protein L31	WP_003421397.1
UAB_RS0211265	922.365	-1.14652	0.115991	-9.88457	4.86e-23	7.26e-22	ABC transporter ATP-binding protein	WP_003435188.1
UAB_RS0212525	30222.5	-0.850325	0.0862382	-9.8602	6.19e-23	9.22e-22	peptidylprolyl isomerase	WP_009890455.1
UAB_RS0218095	913.221	1.42369	0.144482	9.8537	6.61e-23	9.8e-22	formate dehydrogenase accessory sulfurtransferase FdhD	WP_009898490.1
UAB_RS0217960	6687.7	-1.08871	0.11053	-9.84998	6.86e-23	1.01e-21	SEC-C domain-containing protein	WP_009891764.1
UAB_RS0207765	986.853	2.08692	0.211883	9.84938	6.9e-23	1.01e-21	DUF2313 domain-containing protein	WP_003428156.1
UAB_RS0214655	13108.7	-0.844481	0.0858366	-9.83824	7.7e-23	1.13e-21	PRD domain-containing protein	WP_009897844.1
UAB_RS0214455	3865.83	1.71776	0.175442	9.79105	1.23e-22	1.8e-21	amino acid permease	WP_009890849.1
UAB_RS0215150	1833.48	-1.04993	0.107385	-9.77725	1.41e-22	2.05e-21	Cof-type HAD-IIB family hydrolase	WP_004454119.1
UAB_RS0205075	818.815	-1.31419	0.134423	-9.77659	1.42e-22	2.06e-21	TIGR01906 family membrane protein	WP_009902158.1
UAB_RS0219370	683.88	-1.20209	0.122978	-9.77481	1.44e-22	2.08e-21	amidohydrolase family protein	WP_009894081.1
UAB_RS0202785	239.016	2.34606	0.240605	9.75068	1.83e-22	2.63e-21	substrate-binding domain-containing protein	WP_003435917.1
UAB_RS0209995	630.468	1.70564	0.175209	9.73489	2.14e-22	3.06e-21	hypothetical protein	WP_003430242.1
UAB_RS02000000219975	5349.69	-0.957734	0.0986325	-9.71012	2.73e-22	3.89e-21	0	WP_003429494.1
UAB_RS0214030	4394.76	-0.856017	0.0881703	-9.70867	2.77e-22	3.93e-21	sugar ABC transporter permease	WP_009903254.1
UAB_RS0203675	104334	1.09337	0.112774	9.69523	3.16e-22	4.47e-21	hypothetical protein	WP_003439078.1
UAB_RS0209360	13149.9	0.876343	0.0905517	9.67782	3.75e-22	5.28e-21	toxic anion resistance protein	WP_003430084.1
UAB_RS0207885	1948.34	-1.48963	0.154094	-9.66705	4.16e-22	5.85e-21	DMT family transporter	WP_003419730.1
UAB_RS0214775	6124.54	-1.1087	0.115045	-9.6371	5.57e-22	7.8e-21	hypoxanthine phosphoribosyltransferase	WP_003416006.1
UAB_RS0207750	588.951	2.14456	0.222806	9.62528	6.25e-22	8.72e-21	DUF2577 family protein	WP_003438447.1
UAB_RS0216060	4206.14	-0.889078	0.092588	-9.60252	7.8e-22	1.08e-20	IclR family transcriptional regulator	WP_003439844.1
UAB_RS0206025	27604.5	1.25247	0.130452	9.60102	7.92e-22	1.1e-20	electron transfer flavoprotein subunit alpha/FixB family protein	WP_003428573.1
UAB_RS0205560	3820	-1.07712	0.112325	-9.58936	8.86e-22	1.22e-20	aminotransferase class V-fold PLP-dependent enzyme	WP_009895922.1
UAB_RS0208280	42732.8	1.0134	0.105868	9.57239	1.04e-21	1.43e-20	cell wall-binding protein Cwp20	WP_009902521.1
UAB_RS0215925	3075.57	1.35328	0.141642	9.55419	1.25e-21	1.7e-20	CRISPR-associated helicase/endonuclease Cas3	WP_009903367.1
UAB_RS0208625	17253.1	1.07343	0.112587	9.53422	1.51e-21	2.06e-20	NADPH-dependent glutamate synthase	WP_003420072.1
UAB_RS0213790	1969.47	1.19656	0.125599	9.52687	1.62e-21	2.2e-20	TetR/AcrR family transcriptional regulator	WP_004454802.1
UAB_RS0204805	725.438	1.41968	0.149065	9.52391	1.67e-21	2.26e-20	lipoate--protein ligase family protein	WP_003436933.1
UAB_RS0218880	26288.6	-0.947288	0.0994711	-9.52325	1.68e-21	2.26e-20	ribose-phosphate pyrophosphokinase	WP_003421448.1
UAB_RS0201055	19656.5	-0.841325	0.0883816	-9.51923	1.74e-21	2.34e-20	0	WP_003421190.1
UAB_RS0201060	48697.4	-0.947901	0.0997405	-9.50366	2.03e-21	2.71e-20	0	WP_003421189.1
UAB_RS0215900	1651.97	-1.05268	0.110785	-9.50197	2.06e-21	2.75e-20	hypothetical protein	WP_009898073.1
UAB_RS0202360	3516.12	1.29024	0.136267	9.46852	2.84e-21	3.77e-20	bifunctional phosphoribosylaminoimidazolecarboxamide formyltransferase/IMP cyclohydrolase	WP_009901734.1
UAB_RS0215700	89.6787	4.11699	0.435372	9.45627	3.19e-21	4.23e-20	UxaA family hydrolase	WP_009891186.1
UAB_RS0207790	13389.7	-0.897306	0.0951724	-9.42822	4.17e-21	5.51e-20	hypothetical protein	WP_003419674.1
UAB_RS0209715	969.485	1.41521	0.150209	9.42161	4.44e-21	5.84e-20	bifunctional diaminohydroxyphosphoribosylaminopyrimidine deaminase/5-amino-6-(5-phosphoribosylamino)uracil reductase RibD	WP_009896839.1
UAB_RS0213520	614.762	1.48365	0.157644	9.41139	4.9e-21	6.42e-20	CRISPR-associated protein Cas5	WP_009903199.1
UAB_RS0207080	776.225	-1.26297	0.134216	-9.40998	4.96e-21	6.48e-20	glycopeptide resistance protein VanZ1	WP_009889012.1
UAB_RS0214460	2134.29	1.72489	0.183498	9.40001	5.46e-21	7.1e-20	aminopeptidase P family protein	WP_004454949.1
UAB_RS0214360	40952	-0.769144	0.0823702	-9.33765	9.85e-21	1.28e-19	amino acid permease	WP_003426910.1
UAB_RS0205405	9185.66	0.870934	0.0932786	9.33691	9.92e-21	1.28e-19	ABC transporter permease	WP_009895878.1
UAB_RS0207560	2427.75	0.933966	0.10034	9.30806	1.3e-20	1.68e-19	tyrosine-type recombinase/integrase	WP_009889110.1
UAB_RS0217615	19565.6	0.949532	0.102075	9.30229	1.37e-20	1.76e-19	Cys-Gln thioester bond-forming surface protein	WP_009903672.1
UAB_RS0219665	25904.7	-1.04618	0.112462	-9.3025	1.37e-20	1.76e-19	30S ribosomal protein S18	WP_003420527.1
UAB_RS0203915	4964.47	-0.948661	0.102177	-9.28451	1.62e-20	2.07e-19	DegV family protein	WP_003438997.1
UAB_RS0208635	4238.77	0.900542	0.0972062	9.26424	1.96e-20	2.5e-19	EAL domain-containing protein	WP_009902557.1
UAB_RS0203065	561.138	1.41907	0.153309	9.25628	2.12e-20	2.68e-19	PRD domain-containing protein	WP_009901799.1
UAB_RS0213270	3842.35	-0.94792	0.102701	-9.22994	2.71e-20	3.42e-19	MarR family transcriptional regulator	WP_004454702.1
UAB_RS0211435	7697.41	-0.796417	0.0863123	-9.22715	2.78e-20	3.49e-19	hypothetical protein	WP_009902970.1
UAB_RS0213485	48318.3	-0.912043	0.0989177	-9.22022	2.96e-20	3.72e-19	GatB/YqeY domain-containing protein	WP_003430905.1
UAB_RS0200745	14954.2	-0.739539	0.0802454	-9.21597	3.08e-20	3.85e-19	0	WP_003435562.1
UAB_RS0219125	1450.44	-1.09261	0.118769	-9.19943	3.6e-20	4.48e-19	DUF1934 domain-containing protein	WP_003434949.1
UAB_RS0210910	502.567	1.3523	0.147405	9.17407	4.55e-20	5.65e-19	HAMP domain-containing histidine kinase	WP_009902863.1
UAB_RS0216345	611.737	1.29741	0.141514	9.16807	4.82e-20	5.95e-19	xylose isomerase	WP_009898127.1
UAB_RS0202365	3105.9	1.40899	0.153728	9.16548	4.93e-20	6.08e-19	0	WP_003436062.1
UAB_RS0211060	667.783	-1.14726	0.125511	-9.14073	6.2e-20	7.62e-19	tryptophan transporter	WP_003435247.1
UAB_RS0212035	1104.99	1.17938	0.129214	9.1274	7.02e-20	8.59e-19	4Fe-4S binding protein	WP_003433947.1
UAB_RS0214035	30336.7	-0.883148	0.0968193	-9.12161	7.4e-20	9.03e-19	sugar ABC transporter substrate-binding protein	WP_004454864.1
UAB_RS0215840	650.528	1.40395	0.153973	9.11816	7.64e-20	9.29e-19	hypothetical protein	WP_003426769.1
UAB_RS0200605	909.686	1.69898	0.186497	9.10997	8.24e-20	9.99e-19	tape measure protein	WP_025991999.1
UAB_RS0217460	2765.2	-0.939046	0.103308	-9.08981	9.92e-20	1.2e-18	PIG-L family deacetylase	WP_009903655.1
UAB_RS0203530	665.744	-1.13936	0.125354	-9.08915	9.98e-20	1.2e-18	MarR family transcriptional regulator	WP_003434724.1
UAB_RS0217625	3373.12	1.18313	0.130846	9.04217	1.54e-19	1.84e-18	proline reductase-associated electron transfer protein PrdC	WP_003431873.1
UAB_RS0203535	1531.84	-0.986119	0.109105	-9.03822	1.59e-19	1.91e-18	EFR1 family ferrodoxin	WP_009901940.1
UAB_RS0204970	123.308	2.8487	0.315289	9.03521	1.64e-19	1.95e-18	PTS glucitol/sorbitol transporter subunit IIC	WP_009902147.1
UAB_RS0206035	23058.3	1.18209	0.130994	9.02398	1.81e-19	2.16e-18	3-hydroxybutyryl-CoA dehydrogenase	WP_003418897.1
UAB_RS0219180	9068.77	-1.06961	0.118931	-8.99354	2.39e-19	2.84e-18	SEC-C domain-containing protein	WP_003434936.1
UAB_RS0208505	2044.1	1.11025	0.123596	8.98293	2.64e-19	3.12e-18	DUF2520 domain-containing protein	WP_071605615.1
UAB_RS0213940	976.647	1.07687	0.120301	8.9514	3.51e-19	4.13e-18	ECF transporter S component	WP_009903232.1
UAB_RS0202790	128.873	2.48451	0.277968	8.93809	3.96e-19	4.65e-18	sugar ABC transporter ATP-binding protein	WP_009901779.1
UAB_RS0218925	2726.8	-1.15783	0.129776	-8.92175	4.59e-19	5.37e-18	16S rRNA (adenine(1518)-N(6)/adenine(1519)-N(6))-dimethyltransferase RsmA	WP_003437899.1
UAB_RS0211925	19109.3	-0.809882	0.0908631	-8.91321	4.96e-19	5.78e-18	VanW family protein	WP_009903047.1
UAB_RS0204015	1275.01	-0.972641	0.109208	-8.90632	5.28e-19	6.14e-18	GntR family transcriptional regulator	WP_009902011.1
UAB_RS0205875	870.739	-1.22151	0.137207	-8.90266	5.45e-19	6.32e-18	ABC transporter permease	WP_003437015.1
UAB_RS0209335	9685.99	0.872259	0.09807	8.89425	5.88e-19	6.8e-18	TerD family protein	WP_003420269.1
UAB_RS0202160	754.87	-1.05941	0.119231	-8.88533	6.37e-19	7.34e-18	0	WP_009901705.1
UAB_RS0209340	7028.29	1.00347	0.112969	8.88272	6.52e-19	7.5e-18	TerD family protein	WP_004454531.1
UAB_RS0209345	5896.68	1.22292	0.137889	8.86889	7.39e-19	8.46e-18	TerD family protein	WP_003430074.1
UAB_RS0218100	3987.3	1.1441	0.129025	8.86725	7.5e-19	8.56e-18	formate dehydrogenase subunit alpha	WP_077700252.1
UAB_RS0209705	623.673	1.29111	0.145724	8.85992	8.01e-19	9.11e-18	bifunctional 3,4-dihydroxy-2-butanone-4-phosphate synthase/GTP cyclohydrolase II	WP_009902724.1
UAB_RS0215940	1303.84	1.32628	0.149767	8.85561	8.32e-19	9.44e-18	type I-B CRISPR-associated protein Cas8b1/Cst1	WP_009903372.1
UAB_RS0208670	1572.58	-1.29583	0.14655	-8.84225	9.38e-19	1.06e-17	DUF1836 domain-containing protein	WP_016728545.1
UAB_RS0207780	1068.12	1.70583	0.193054	8.83603	9.92e-19	1.12e-17	hypothetical protein	WP_009902444.1
UAB_RS0207555	6574.97	-1.08888	0.123376	-8.82568	1.09e-18	1.22e-17	undecaprenyl-diphosphate phosphatase	WP_003438350.1
UAB_RS0219630	10974.9	-0.720841	0.08173	-8.81979	1.15e-18	1.29e-17	adenylosuccinate synthase	WP_003434259.1
UAB_RS0204800	789.252	1.58406	0.179625	8.81874	1.16e-18	1.29e-17	radical SAM protein	WP_003436931.1
UAB_RS0215420	2243.34	-0.807015	0.0916848	-8.80206	1.34e-18	1.5e-17	ABC transporter ATP-binding protein	WP_003426617.1
UAB_RS0218085	920.286	1.49489	0.170152	8.78561	1.56e-18	1.73e-17	4Fe-4S dicluster domain-containing protein	WP_009891793.1
UAB_RS0202040	11789.6	-0.812638	0.0925137	-8.78398	1.58e-18	1.75e-17	0	WP_003434503.1
UAB_RS0204750	2762.34	1.49423	0.170231	8.77767	1.67e-18	1.84e-17	methylenetetrahydrofolate reductase	WP_003436920.1
UAB_RS0204575	3539.17	0.810642	0.0923778	8.77529	1.7e-18	1.88e-17	hypothetical protein	WP_009902102.1
UAB_RS0214025	5708.74	-0.911499	0.10394	-8.76946	1.8e-18	1.97e-17	carbohydrate ABC transporter permease	WP_004454862.1
UAB_RS0213845	6438.36	-1.00045	0.114157	-8.76376	1.89e-18	2.07e-17	asparaginase	WP_003431031.1
UAB_RS0217650	4159.12	-0.977173	0.111594	-8.75648	2.01e-18	2.2e-17	TIGR03905 family TSCPD domain-containing protein	WP_009891710.1
UAB_RS0211695	10022.9	-1.11365	0.127237	-8.75254	2.09e-18	2.27e-17	NCS2 family permease	WP_009897252.1
UAB_RS0206020	22560.8	1.20059	0.137197	8.75081	2.12e-18	2.3e-17	electron transfer flavoprotein subunit beta/FixA family protein	WP_009888867.1
UAB_RS0211965	8030.88	0.892439	0.102192	8.73299	2.48e-18	2.68e-17	[FeFe] hydrogenase H-cluster radical SAM maturase HydG	WP_003430581.1
UAB_RS0217485	8466.76	-0.816243	0.0934866	-8.73112	2.52e-18	2.72e-17	L-serine ammonia-lyase	WP_003422058.1
UAB_RS0214270	2052.05	-1.0925	0.125315	-8.71808	2.83e-18	3.04e-17	ABC transporter permease	WP_009903272.1
UAB_RS0212775	9307.45	-1.07508	0.123564	-8.70057	3.3e-18	3.54e-17	cold-shock protein	WP_003423148.1
UAB_RS0210905	497.355	1.28879	0.148531	8.67688	4.07e-18	4.35e-17	response regulator transcription factor	WP_009897092.1
UAB_RS0213255	2941.55	-0.849138	0.098029	-8.66211	4.63e-18	4.94e-17	C40 family peptidase	WP_009903185.1
UAB_RS0215555	8992.11	0.852401	0.0984926	8.65447	4.95e-18	5.27e-17	carbon-nitrogen hydrolase family protein	WP_003436788.1
UAB_RS0213515	2275.77	1.16384	0.134595	8.64695	5.29e-18	5.61e-17	CRISPR-associated helicase/endonuclease Cas3	WP_009903197.1
UAB_RS0212425	1737.4	-1.04272	0.120776	-8.63357	5.95e-18	6.29e-17	zinc ribbon domain-containing protein	WP_003433823.1
UAB_RS0208380	308.625	-1.3501	0.156431	-8.63067	6.1e-18	6.43e-17	YafY family transcriptional regulator	WP_009902531.1
UAB_RS0201620	3627.64	0.887927	0.103025	8.61857	6.78e-18	7.13e-17	0	WP_009901609.1
UAB_RS0206040	40248.5	1.19068	0.138302	8.60928	7.35e-18	7.71e-17	acetyl-CoA C-acetyltransferase	WP_009888868.1
UAB_RS0214675	134069	-0.867063	0.100747	-8.60637	7.54e-18	7.88e-17	ABC transporter substrate-binding protein	WP_004454985.1
UAB_RS0207165	1481.35	-1.03028	0.119827	-8.59804	8.11e-18	8.45e-17	16S rRNA processing protein RimM	WP_009889030.1
UAB_RS0213975	877.544	0.997542	0.11617	8.58692	8.93e-18	9.29e-17	DUF4846 domain-containing protein	WP_009903242.1
UAB_RS0207170	1695.59	-1.06857	0.124482	-8.58411	9.15e-18	9.49e-17	tRNA (guanosine(37)-N1)-methyltransferase TrmD	WP_003438222.1
UAB_RS0206800	3011.3	0.878032	0.102456	8.5698	1.04e-17	1.07e-16	recombinase family protein	WP_003438169.1
UAB_RS0207735	8141.8	2.3692	0.27696	8.55429	1.19e-17	1.22e-16	hypothetical protein	WP_003438437.1
UAB_RS0208495	2845.97	1.21714	0.142306	8.55301	1.2e-17	1.23e-16	pantoate--beta-alanine ligase	WP_009902543.1
UAB_RS0213880	619.252	-1.16661	0.136765	-8.52999	1.46e-17	1.5e-16	VanZ family protein	WP_009897711.1
UAB_RS0210960	3549.59	0.936318	0.109932	8.51724	1.63e-17	1.67e-16	cyclase family protein	WP_003428771.1
UAB_RS0208655	16878.5	-1.05748	0.124182	-8.51557	1.66e-17	1.69e-16	Fic family protein	WP_003436700.1
UAB_RS0217635	899.26	1.44617	0.170056	8.50411	1.83e-17	1.86e-16	alpha/beta-type small acid-soluble spore protein	WP_003422115.1
UAB_RS0215980	1303.52	-0.882093	0.103955	-8.48536	2.15e-17	2.18e-16	aliphatic sulfonate ABC transporter substrate-binding protein	WP_003429089.1
UAB_RS0205565	867.347	-1.21473	0.14317	-8.48449	2.17e-17	2.19e-16	adenosylmethionine decarboxylase	WP_003418655.1
UAB_RS0215865	270106	-3.07474	0.362693	-8.47754	2.3e-17	2.32e-16	bifunctional acetaldehyde-CoA/alcohol dehydrogenase	WP_009898069.1
UAB_RS0213630	93375.5	-0.922207	0.108796	-8.47651	2.32e-17	2.33e-16	30S ribosomal protein S20	WP_009890686.1
UAB_RS0212580	430.971	-1.2776	0.150878	-8.46778	2.5e-17	2.51e-16	sodium:alanine symporter family protein	WP_009903125.1
UAB_RS0219215	1114.21	-0.983237	0.11616	-8.46447	2.57e-17	2.57e-16	recombinase family protein	WP_003426023.1
UAB_RS0218270	9940.88	-1.05075	0.124149	-8.46361	2.59e-17	2.59e-16	6-phosphofructokinase	WP_003429132.1
UAB_RS0200560	222.867	2.20043	0.260033	8.46212	2.63e-17	2.61e-16	hypothetical protein	WP_009901504.1
UAB_RS0206105	1461.39	-0.958536	0.113489	-8.44605	3.01e-17	2.99e-16	histidinol-phosphatase HisJ family protein	WP_009896027.1
UAB_RS0213795	4363.73	1.12134	0.13291	8.43682	3.26e-17	3.23e-16	multidrug efflux MFS transporter	WP_009897692.1
UAB_RS0205260	8221.24	0.745255	0.0883726	8.4331	3.37e-17	3.32e-16	rubrerythrin family protein	WP_003418513.1
UAB_RS0209690	2833.47	0.810824	0.0962352	8.42544	3.59e-17	3.54e-16	ArsB/NhaD family transporter	WP_003430161.1
UAB_RS0204545	31015.1	-0.883733	0.105023	-8.41467	3.94e-17	3.87e-16	50S ribosomal protein L20	WP_003429730.1
UAB_RS0204730	27255.1	0.734652	0.087358	8.40967	4.11e-17	4.03e-16	formate--tetrahydrofolate ligase	WP_009888533.1
UAB_RS0204760	2350.59	1.48801	0.177056	8.4042	4.31e-17	4.21e-16	AAA family ATPase	WP_003418348.1
UAB_RS0200185	633.132	1.67511	0.199353	8.40273	4.36e-17	4.25e-16	phage portal protein	WP_009901346.1
UAB_RS0203685	1738.2	-0.901272	0.107475	-8.38586	5.04e-17	4.89e-16	response regulator transcription factor	WP_003439080.1
UAB_RS0216560	15705.3	-0.77598	0.092601	-8.37982	5.3e-17	5.14e-16	YfcC family protein	WP_003440000.1
UAB_RS0205270	4780.9	0.802388	0.0958876	8.368	5.86e-17	5.67e-16	superoxide reductase	WP_004453642.1
UAB_RS0213495	19422.9	0.873668	0.104468	8.36301	6.11e-17	5.89e-16	histidine triad nucleotide-binding protein	WP_003430911.1
UAB_RS0218080	2422.97	1.26913	0.151759	8.36277	6.13e-17	5.89e-16	iron hydrogenase small subunit	WP_003417040.1
UAB_RS0205640	1712.44	0.897495	0.107441	8.3534	6.63e-17	6.36e-16	aldo/keto reductase	WP_003437122.1
UAB_RS0207550	4835.64	-0.972518	0.116491	-8.34842	6.92e-17	6.62e-16	signal peptidase I	WP_009902411.1
UAB_RS0215935	725.361	1.43431	0.172154	8.33156	7.98e-17	7.61e-16	type I-B CRISPR-associated protein Cas7/Cst2/DevR	WP_009903369.1
UAB_RS0211775	16860.8	-0.941282	0.113015	-8.32883	8.16e-17	7.77e-16	nitronate monooxygenase	WP_032506644.1
UAB_RS0207745	5398.61	2.2417	0.269483	8.31851	8.91e-17	8.46e-16	C40 family peptidase	WP_009902435.1
UAB_RS0213775	2248.7	0.924367	0.111182	8.314	9.25e-17	8.76e-16	histidinol-phosphate aminotransferase family protein	WP_009903219.1
UAB_RS0207530	8496.94	0.903947	0.108914	8.29965	1.04e-16	9.86e-16	recombinase RecA	WP_003428218.1
UAB_RS0209055	9928.7	0.706352	0.0852074	8.2898	1.13e-16	1.07e-15	phospho-sugar mutase	WP_009902629.1
UAB_RS0205115	5854.18	0.798312	0.0962996	8.28988	1.13e-16	1.07e-15	NAD(+) synthase	WP_003437535.1
UAB_RS0203665	877.249	-1.01103	0.122667	-8.2421	1.69e-16	1.59e-15	threonine/serine exporter family protein	WP_009888325.1
UAB_RS0209710	237.5	1.82327	0.221494	8.2317	1.85e-16	1.73e-15	riboflavin synthase	WP_009889593.1
UAB_RS0218555	1304.67	-0.910349	0.110657	-8.22675	1.92e-16	1.79e-15	Gfo/Idh/MocA family oxidoreductase	WP_009903773.1
UAB_RS0211245	3928.49	0.944899	0.115206	8.20182	2.37e-16	2.2e-15	ATP-dependent chaperone ClpB	WP_003435194.1
UAB_RS0211945	5516.69	-0.942815	0.115057	-8.1943	2.52e-16	2.34e-15	M42 family metallopeptidase	WP_003433978.1
UAB_RS0212510	3912.52	-1.00056	0.122428	-8.17264	3.02e-16	2.79e-15	peptide MFS transporter	WP_009903115.1
UAB_RS0213970	1530.51	1.02879	0.126075	8.16015	3.35e-16	3.09e-15	5'-nucleotidase C-terminal domain-containing protein	WP_009903241.1
UAB_RS0217325	1170.87	1.00129	0.122915	8.14618	3.76e-16	3.46e-15	excinuclease ABC subunit UvrA	WP_009903628.1
UAB_RS0211280	2700.72	0.803597	0.098763	8.13662	4.06e-16	3.74e-15	M20 family metallo-hydrolase	WP_009893396.1
UAB_RS0211460	3758.64	0.715559	0.0879789	8.1333	4.18e-16	3.83e-15	lactate utilization protein	WP_003435129.1
UAB_RS0207160	419.545	-1.45918	0.179412	-8.1331	4.18e-16	3.83e-15	KH domain-containing protein	WP_003419342.1
UAB_RS0209070	109.006	-1.84964	0.227902	-8.11594	4.82e-16	4.4e-15	homoserine dehydrogenase	WP_003429993.1
UAB_RS0216510	559.358	1.13274	0.139598	8.11426	4.89e-16	4.45e-15	alpha,alpha-phosphotrehalase	WP_003439981.1
UAB_RS0213750	16444.1	-0.798134	0.0983766	-8.11305	4.94e-16	4.48e-15	D-alanyl-D-alanine carboxypeptidase	WP_004454794.1
UAB_RS0207590	46359.3	0.901778	0.111271	8.10437	5.3e-16	4.8e-15	pyridoxal phosphate-dependent aminotransferase	WP_003438357.1
UAB_RS0218720	1310.76	-0.986106	0.121744	-8.09983	5.5e-16	4.97e-15	ZIP family metal transporter	WP_003425887.1
UAB_RS0209260	787.882	-1.18315	0.146267	-8.08895	6.02e-16	5.42e-15	ABC transporter permease	WP_003436375.1
UAB_RS0211690	3131.12	-1.02178	0.126333	-8.08799	6.07e-16	5.45e-15	DEAD/DEAH box helicase	WP_009903010.1
UAB_RS0208360	3665.84	0.74502	0.092146	8.08522	6.21e-16	5.57e-15	aliphatic sulfonate ABC transporter substrate-binding protein	WP_012816136.1
UAB_RS0214610	1806.74	-0.82214	0.101929	-8.0658	7.28e-16	6.51e-15	16S rRNA (cytosine(1402)-N(4))-methyltransferase RsmH	WP_003427011.1
UAB_RS0213715	194.271	1.61799	0.200622	8.06487	7.33e-16	6.54e-15	M20 family metallopeptidase	WP_009897681.1
UAB_RS0205265	2634.36	0.779268	0.0966942	8.0591	7.69e-16	6.84e-15	transcriptional repressor	WP_009888638.1
UAB_RS0205795	912.498	-0.908003	0.112967	-8.03781	9.15e-16	8.12e-15	glucosamine-6-phosphate deaminase	WP_003437039.1
UAB_RS0218585	743.308	1.19896	0.14918	8.03701	9.21e-16	8.16e-15	5-formyltetrahydrofolate cyclo-ligase	WP_009892015.1
UAB_RS0200095	366.444	-1.53615	0.191634	-8.01607	1.09e-15	9.65e-15	0	0
UAB_RS0206430	7867.25	0.723067	0.0902213	8.01436	1.11e-15	9.76e-15	TIGR03960 family B12-binding radical SAM protein	WP_003419074.1
UAB_RS0218755	577.877	-1.19664	0.149421	-8.00853	1.16e-15	1.02e-14	oligoendopeptidase F	WP_009903791.1
UAB_RS0205550	1400.17	0.996512	0.124498	8.00424	1.2e-15	1.06e-14	glycoside hydrolase family 13 protein	WP_009895919.1
UAB_RS0202345	2726.49	0.956062	0.119802	7.98038	1.46e-15	1.28e-14	0	WP_003425288.1
UAB_RS0218725	10957.4	-0.666661	0.0836561	-7.96906	1.6e-15	1.4e-14	peptide chain release factor 1	WP_003421389.1
UAB_RS0207470	26498.6	-0.881254	0.110909	-7.94577	1.93e-15	1.68e-14	30S ribosomal protein S15	WP_003419491.1
UAB_RS0209445	21069.3	-1.09633	0.138048	-7.94169	1.99e-15	1.73e-14	0	0
UAB_RS0214425	1680.29	1.09466	0.138165	7.92285	2.32e-15	2.01e-14	PTS sugar transporter subunit IIC	WP_003416156.1
UAB_RS0204465	1682.42	-0.88037	0.111343	-7.90684	2.64e-15	2.29e-14	methyltransferase domain-containing protein	WP_009902078.1
UAB_RS0207525	2250.57	-0.827101	0.104735	-7.89707	2.86e-15	2.47e-14	CDP-diacylglycerol--glycerol-3-phosphate 3-phosphatidyltransferase	WP_009889106.1
UAB_RS0200205	363.688	1.94611	0.246777	7.88608	3.12e-15	2.69e-14	phage scaffolding protein	WP_032512327.1
UAB_RS0207365	1764.57	-0.851902	0.108287	-7.86705	3.63e-15	3.12e-14	segregation/condensation protein A	WP_003419448.1
UAB_RS0213705	117.629	2.14004	0.273392	7.82775	4.97e-15	4.26e-14	PTS sugar transporter subunit IIA	WP_009897677.1
UAB_RS0210885	497.233	1.04022	0.132932	7.82521	5.07e-15	4.34e-14	ABC transporter ATP-binding protein	WP_003435313.1
UAB_RS0210300	1813.69	0.821	0.104951	7.82272	5.17e-15	4.41e-14	flavodoxin family protein	WP_009902779.1
UAB_RS0215100	148.655	1.83736	0.235651	7.79698	6.34e-15	5.4e-14	hypothetical protein	WP_009891012.1
UAB_RS0203800	5758.43	0.938989	0.120745	7.77663	7.45e-15	6.33e-14	ornithine cyclodeaminase family protein	WP_003439110.1
UAB_RS0214320	3104.42	0.805566	0.103594	7.77619	7.47e-15	6.34e-14	hypothetical protein	WP_004454925.1
UAB_RS0219415	1616.05	0.992462	0.127764	7.7679	7.98e-15	6.75e-14	potassium/proton antiporter	WP_003435782.1
UAB_RS0219410	1313.57	1.10067	0.141709	7.76712	8.03e-15	6.78e-14	MerR family transcriptional regulator	WP_003435784.1
UAB_RS0200760	4325.51	-0.738188	0.0950538	-7.766	8.1e-15	6.82e-14	0	WP_009901539.1
UAB_RS0213810	5908.03	0.802277	0.103355	7.76233	8.34e-15	7.01e-14	6-phospho-alpha-glucosidase	WP_009897699.1
UAB_RS0214640	23757.6	-0.714775	0.0921329	-7.75809	8.62e-15	7.23e-14	UDP-N-acetylmuramoyl-L-alanyl-D-glutamate--2,6-diaminopimelate ligase	WP_009897839.1
UAB_RS0201045	10066.3	-0.952359	0.122896	-7.74931	9.24e-15	7.73e-14	0	WP_003421192.1
UAB_RS0209725	194.451	1.54487	0.19958	7.74058	9.9e-15	8.26e-14	phosphomethylpyrimidine synthase ThiC	WP_009889633.1
UAB_RS0202775	241.489	1.40306	0.181317	7.73814	1.01e-14	8.4e-14	0	WP_009895371.1
UAB_RS0204745	1620.23	1.42049	0.183587	7.73741	1.01e-14	8.43e-14	methylenetetrahydrofolate reductase C-terminal domain-containing protein	WP_003436912.1
UAB_RS0210955	1443.04	0.910605	0.117817	7.729	1.08e-14	8.99e-14	prolyl-tRNA synthetase associated domain-containing protein	WP_003433028.1
UAB_RS0204785	3128.54	0.861745	0.111728	7.71292	1.23e-14	1.02e-13	glycine cleavage system protein GcvH	WP_003418363.1
UAB_RS0202350	2395.86	0.987958	0.128127	7.71078	1.25e-14	1.03e-13	0	WP_009901733.1
UAB_RS0204985	242.16	2.13093	0.276389	7.70989	1.26e-14	1.04e-13	sorbitol-6-phosphate dehydrogenase	WP_009895815.1
UAB_RS0205955	1460.79	1.03646	0.13505	7.67459	1.66e-14	1.36e-13	exonuclease SbcCD subunit D	WP_003437948.1
UAB_RS0214100	46373.6	-0.909958	0.118702	-7.66589	1.78e-14	1.46e-13	50S ribosomal protein L28	WP_003416297.1
UAB_RS0203060	1092.45	1.29983	0.16974	7.65778	1.89e-14	1.55e-13	0	WP_009901797.1
UAB_RS0217890	94.9273	2.38771	0.312072	7.65116	1.99e-14	1.63e-13	PTS system mannose/fructose/sorbose family transporter subunit IID	WP_003432375.1
UAB_RS0202250	5145.09	-0.815659	0.106943	-7.62706	2.4e-14	1.96e-13	0	WP_009895291.1
UAB_RS0208650	13383.5	-0.968614	0.127004	-7.62662	2.41e-14	1.96e-13	MATE family efflux transporter	WP_003436703.1
UAB_RS0212410	259.489	1.37711	0.180594	7.62546	2.43e-14	1.97e-13	N-acetylneuraminate lyase	WP_021359411.1
UAB_RS0216400	3207.78	0.896474	0.117718	7.61542	2.63e-14	2.13e-13	DEAD/DEAH box helicase family protein	WP_009903438.1
UAB_RS0204655	9173.76	0.633211	0.0832304	7.60793	2.79e-14	2.25e-13	transporter substrate-binding domain-containing protein	WP_032512351.1
UAB_RS0209255	888.558	-1.05874	0.139222	-7.60469	2.86e-14	2.3e-13	ABC transporter ATP-binding protein	WP_003436372.1
UAB_RS0203000	357.014	-1.06326	0.139914	-7.59943	2.97e-14	2.39e-13	0	WP_009901789.1
UAB_RS0203140	91915.2	-0.711889	0.093778	-7.59122	3.17e-14	2.54e-13	0	WP_003417352.1
UAB_RS0212235	1371.42	-0.807148	0.106455	-7.58203	3.4e-14	2.72e-13	flavodoxin	WP_009897366.1
UAB_RS0206790	849.52	-0.913747	0.120514	-7.58211	3.4e-14	2.72e-13	penicillin-binding protein 2	WP_009902312.1
UAB_RS0217885	226.789	1.47866	0.195102	7.57891	3.48e-14	2.78e-13	SIS domain-containing protein	WP_003432374.1
UAB_RS0208875	145.573	2.02454	0.267803	7.55981	4.04e-14	3.21e-13	hypothetical protein	WP_009902595.1
UAB_RS0209125	4922.34	-0.780354	0.103283	-7.55552	4.17e-14	3.31e-13	YitT family protein	WP_003420189.1
UAB_RS0215930	571.781	1.25981	0.16678	7.55372	4.23e-14	3.35e-13	type I-B CRISPR-associated protein Cas5	WP_003439785.1
UAB_RS0214355	2402.58	-0.719052	0.0954802	-7.5309	5.04e-14	3.98e-13	5'-methylthioadenosine/adenosylhomocysteine nucleosidase	WP_003416187.1
UAB_RS0219445	2734.09	-0.801587	0.10658	-7.52099	5.44e-14	4.29e-13	alkylphosphonate utilization protein	WP_003435770.1
UAB_RS0206445	27245.3	-1.01598	0.135104	-7.51995	5.48e-14	4.31e-13	50S ribosomal protein L21	WP_003419082.1
UAB_RS0214575	7730.96	-0.65086	0.0866126	-7.51461	5.71e-14	4.48e-13	undecaprenyldiphospho-muramoylpentapeptide beta-N-acetylglucosaminyltransferase	WP_009893705.1
UAB_RS0216385	1091.38	-0.824416	0.109786	-7.50931	5.94e-14	4.66e-13	DUF523 domain-containing protein	WP_009903436.1
UAB_RS0215115	11077	-0.644883	0.085926	-7.5051	6.14e-14	4.8e-13	patatin-like phospholipase family protein	WP_003431793.1
UAB_RS0207770	2428.39	2.12381	0.283057	7.50311	6.23e-14	4.86e-13	phage tail protein	WP_009902440.1
UAB_RS0218575	1053.24	-0.848564	0.11325	-7.49284	6.74e-14	5.25e-13	DNA-binding protein	WP_003425821.1
UAB_RS0211785	5895.11	-0.935428	0.12488	-7.49059	6.86e-14	5.33e-13	magnesium transporter CorA family protein	WP_003430615.1
UAB_RS0218715	2819.41	-0.853024	0.11396	-7.48531	7.14e-14	5.53e-13	threonylcarbamoyl-AMP synthase	WP_009892045.1
UAB_RS0200900	7149.28	-0.697274	0.0932553	-7.47704	7.6e-14	5.88e-13	0	WP_009901548.1
UAB_RS0219240	1839.28	-0.73984	0.0990488	-7.46945	8.05e-14	6.22e-13	MerR family transcriptional regulator	WP_009898772.1
UAB_RS0207785	237.007	1.77977	0.238622	7.45854	8.75e-14	6.74e-13	hypothetical protein	WP_003419670.1
UAB_RS0207775	14699.9	2.01134	0.269874	7.45288	9.13e-14	7.02e-13	chromosome condensation regulator	WP_009902442.1
UAB_RS0213535	568.884	1.04254	0.139999	7.44677	9.57e-14	7.34e-13	CRISPR-associated endoribonuclease Cas6	WP_009903203.1
UAB_RS2000000221830	344.27	1.76031	0.236496	7.4433	9.82e-14	7.52e-13	hypothetical protein	WP_077726256.1
UAB_RS0217685	1150.39	-0.798999	0.107395	-7.4398	1.01e-13	7.71e-13	FUSC family protein	WP_009898391.1
UAB_RS0214790	631.769	-0.949523	0.127635	-7.43937	1.01e-13	7.72e-13	DUF1232 domain-containing protein	WP_003427102.1
UAB_RS0217160	7775.1	-0.741944	0.100161	-7.40755	1.29e-13	9.79e-13	preprotein translocase subunit SecG	WP_003421948.1
UAB_RS0204020	423.401	-1.03849	0.140588	-7.38677	1.5e-13	1.14e-12	hypothetical protein	WP_009902012.1
UAB_RS0202355	1155.84	1.1471	0.155406	7.38133	1.57e-13	1.19e-12	0	WP_003436064.1
UAB_RS02000000221070	317.584	-1.24721	0.16941	-7.3621	1.81e-13	1.37e-12	hypothetical protein	WP_003426006.1
UAB_RS0210165	6178.14	0.763401	0.103728	7.35964	1.84e-13	1.39e-12	HAMP domain-containing histidine kinase	WP_003430278.1
UAB_RS0210160	2886.88	0.678765	0.0924264	7.34384	2.08e-13	1.56e-12	response regulator transcription factor	WP_009896932.1
UAB_RS0207540	2667.19	-0.842233	0.114716	-7.3419	2.11e-13	1.58e-12	diguanylate cyclase	WP_003438341.1
UAB_RS0211440	4938.55	-0.778172	0.106048	-7.33793	2.17e-13	1.63e-12	hypothetical protein	WP_003433003.1
UAB_RS0206490	418.131	1.68151	0.2294	7.33006	2.3e-13	1.72e-12	nickel-dependent lactate racemase	WP_003438088.1
UAB_RS0208675	2201.48	-1.0653	0.145596	-7.31685	2.54e-13	1.9e-12	hemolysin III family protein	WP_003436685.1
UAB_RS0218355	7772.43	0.816906	0.112061	7.28981	3.1e-13	2.32e-12	excinuclease ABC subunit UvrB	WP_009891935.1
UAB_RS0210755	2096.08	-0.801738	0.110129	-7.27998	3.34e-13	2.49e-12	MBL fold metallo-hydrolase	WP_003435380.1
UAB_RS0213900	2790.07	0.685299	0.0942111	7.27409	3.49e-13	2.59e-12	nicotinate-nucleotide adenylyltransferase	WP_003416411.1
UAB_RS0215425	2180.08	-0.695958	0.0959027	-7.25692	3.96e-13	2.93e-12	ABC transporter ATP-binding protein	WP_009897981.1
UAB_RS0214615	921.628	-0.834539	0.114995	-7.25718	3.95e-13	2.93e-12	prolipoprotein diacylglyceryl transferase	WP_009897834.1
UAB_RS0213840	3615.55	-0.741598	0.102262	-7.25193	4.11e-13	3.03e-12	aspartate 4-decarboxylase	WP_009897704.1
UAB_RS0216335	1855.98	-0.837981	0.115842	-7.23381	4.7e-13	3.46e-12	MurR/RpiR family transcriptional regulator	WP_003431361.1
UAB_RS0204470	234.229	-1.25648	0.174244	-7.21104	5.55e-13	4.08e-12	GNAT family N-acetyltransferase	WP_003439164.1
UAB_RS0217570	15834.3	2.28508	0.316952	7.20955	5.61e-13	4.12e-12	proline racemase	WP_003422090.1
UAB_RS0212960	750.43	0.942126	0.13073	7.20665	5.73e-13	4.2e-12	hypothetical protein	WP_009903154.1
UAB_RS0206455	8267.02	-1.05313	0.146186	-7.20401	5.85e-13	4.28e-12	50S ribosomal protein L27	WP_003419086.1
UAB_RS0217195	3608.34	0.895656	0.124537	7.19188	6.39e-13	4.66e-12	RNA polymerase factor sigma-54	WP_003421965.1
UAB_RS0215945	378.703	1.24703	0.174159	7.16031	8.05e-13	5.86e-12	CRISPR-associated endoribonuclease Cas6	WP_009903374.1
UAB_RS0213420	7315.84	0.649092	0.0907238	7.15459	8.39e-13	6.1e-12	DUF4342 domain-containing protein	WP_009890640.1
UAB_RS0209820	1196.88	-0.989631	0.138971	-7.12114	1.07e-12	7.77e-12	transcriptional regulator	WP_009902729.1
UAB_RS0201000	180507	0.994937	0.139774	7.1182	1.09e-12	7.92e-12	0	WP_009895182.1
UAB_RS0206780	1685.24	-0.85183	0.119811	-7.10975	1.16e-12	8.4e-12	O-methyltransferase	WP_003438166.1
UAB_RS0200065	205.115	2.15206	0.302819	7.10676	1.19e-12	8.57e-12	baseplate J/gp47 family protein	WP_009901332.1
UAB_RS0200580	392.854	1.58943	0.223702	7.10512	1.2e-12	8.65e-12	phage portal protein	WP_003429853.1
UAB_RS0215340	15201.1	-0.728397	0.102557	-7.1024	1.23e-12	8.81e-12	preprotein translocase subunit YajC	WP_003426573.1
UAB_RS0208125	1221.46	-0.915457	0.12903	-7.09494	1.29e-12	9.28e-12	CidA/LrgA family protein	WP_003419862.1
UAB_RS0206015	28675.7	0.999503	0.140998	7.08875	1.35e-12	9.69e-12	acyl-CoA dehydrogenase	WP_003418888.1
UAB_RS0208960	298.28	1.90191	0.26874	7.07714	1.47e-12	1.05e-11	helix-turn-helix domain-containing protein	WP_009902611.1
UAB_RS0206785	6218.8	-0.879718	0.124387	-7.07245	1.52e-12	1.09e-11	U32 family peptidase	WP_003438167.1
UAB_RS0209440	9424.28	-0.732132	0.1036	-7.06687	1.58e-12	1.13e-11	Na+/H+ antiporter NhaC family protein	WP_009889552.1
UAB_RS0205595	4760.73	-0.669734	0.094913	-7.0563	1.71e-12	1.21e-11	MBL fold metallo-hydrolase	WP_009902208.1
UAB_RS2000000221340	143.77	1.78408	0.253192	7.04636	1.84e-12	1.3e-11	PTS glucitol/sorbitol transporter subunit IIB	WP_003418410.1
UAB_RS0217395	1024.84	-0.792188	0.112719	-7.02797	2.1e-12	1.48e-11	MATE family efflux transporter	WP_009891654.1
UAB_RS0200575	306.367	1.75151	0.249217	7.02805	2.09e-12	1.48e-11	phage tail tube protein	WP_003429851.1
UAB_RS0213540	4072.3	-0.970718	0.13817	-7.02556	2.13e-12	1.5e-11	sn-glycerol-3-phosphate ABC transporter ATP-binding protein UgpC	WP_009903205.1
UAB_RS0218930	1191.64	-0.776167	0.110517	-7.02303	2.17e-12	1.53e-11	ribonuclease M5	WP_009898732.1
UAB_RS0214275	1131.59	-0.804199	0.114635	-7.01533	2.29e-12	1.61e-11	bifunctional pyr operon transcriptional regulator/uracil phosphoribosyltransferase PyrR	WP_003431186.1
UAB_RS0217055	2377.68	0.76931	0.109743	7.01011	2.38e-12	1.67e-11	hypothetical protein	WP_009903579.1
UAB_RS0202655	2350.23	0.825386	0.117816	7.00575	2.46e-12	1.72e-11	0	WP_009901770.1
UAB_RS0208995	386.267	1.2869	0.183753	7.00344	2.5e-12	1.74e-11	N-acetylmuramoyl-L-alanine amidase	WP_009902619.1
UAB_RS0211395	9640.58	-0.788669	0.11271	-6.99731	2.61e-12	1.82e-11	MurR/RpiR family transcriptional regulator	WP_003424273.1
UAB_RS0201585	2168.58	-0.651038	0.0930502	-6.99663	2.62e-12	1.82e-11	0	WP_003425424.1
UAB_RS0206435	2778.34	0.858138	0.122705	6.99348	2.68e-12	1.86e-11	DUF2344 domain-containing protein	WP_003438070.1
UAB_RS0213530	832.769	1.14874	0.164265	6.99322	2.69e-12	1.86e-11	hypothetical protein	WP_009903202.1
UAB_RS0206865	1930.2	0.784864	0.112374	6.98442	2.86e-12	1.98e-11	alpha/beta hydrolase	WP_003437218.1
UAB_RS0208065	299.36	-1.18986	0.170784	-6.96701	3.24e-12	2.24e-11	helix-turn-helix transcriptional regulator	WP_003429379.1
UAB_RS0203670	482.379	-0.947502	0.136047	-6.96452	3.3e-12	2.27e-11	threonine/serine exporter family protein	WP_003425056.1
UAB_RS0208715	399.786	1.10372	0.158608	6.95881	3.43e-12	2.36e-11	imidazole glycerol phosphate synthase subunit HisF	WP_003436672.1
UAB_RS0210875	13078.2	-0.765172	0.110037	-6.95376	3.56e-12	2.44e-11	coenzyme F420-0:L-glutamate ligase	WP_003424103.1
UAB_RS0203525	572.485	-1.14786	0.16522	-6.94748	3.72e-12	2.55e-11	0	WP_003434723.1
UAB_RS0202335	1051.56	0.886115	0.128402	6.90108	5.16e-12	3.53e-11	0	WP_003425290.1
UAB_RS0211675	1001.43	-0.779486	0.113361	-6.87614	6.15e-12	4.2e-11	flippase-like domain-containing protein	WP_009903006.1
UAB_RS0205675	1148.64	0.713692	0.103886	6.86997	6.42e-12	4.38e-11	phosphatase	WP_009895939.1
UAB_RS0206860	1275.81	0.757562	0.110289	6.86889	6.47e-12	4.4e-11	DUF3788 domain-containing protein	WP_003437216.1
UAB_RS0218630	1153.43	0.783735	0.114261	6.85915	6.93e-12	4.7e-11	CBS domain-containing protein	WP_003421362.1
UAB_RS0201970	3628.7	-0.746462	0.108841	-6.85829	6.97e-12	4.72e-11	0	WP_003425390.1
UAB_RS0219095	11924.3	-0.704879	0.102805	-6.85644	7.06e-12	4.78e-11	type III pantothenate kinase	WP_003425980.1
UAB_RS0212875	16080.8	-0.653221	0.0953124	-6.85347	7.21e-12	4.86e-11	fructose-6-phosphate aldolase	WP_003423115.1
UAB_RS0210995	10131.7	0.774891	0.113063	6.85362	7.2e-12	4.86e-11	DNA mismatch repair protein MutS	WP_009902880.1
UAB_RS0208665	326.857	1.29305	0.188898	6.84521	7.64e-12	5.14e-11	hypothetical protein	WP_003429769.1
UAB_RS0207330	1205.61	-0.887618	0.129742	-6.84141	7.84e-12	5.27e-11	metal-dependent hydrolase	WP_003428273.1
UAB_RS2000000221335	50.8488	2.93899	0.429699	6.83965	7.94e-12	5.32e-11	PTS sorbose transporter subunit IIB	WP_003437467.1
UAB_RS0215950	340.826	1.27264	0.186244	6.8332	8.3e-12	5.56e-11	WYL domain-containing protein	WP_003439791.1
UAB_RS0207360	2522.9	-0.698828	0.102277	-6.83269	8.33e-12	5.57e-11	site-2 protease family protein	WP_009902398.1
UAB_RS0207520	4146.98	-0.674495	0.0987332	-6.8315	8.4e-12	5.61e-11	30S ribosomal protein S12 methylthiotransferase RimO	WP_003433320.1
UAB_RS0208480	4046.12	0.937785	0.137294	6.8305	8.46e-12	5.63e-11	lactate utilization protein	WP_009902542.1
UAB_RS0203265	404.902	-1.01816	0.149235	-6.82253	8.94e-12	5.95e-11	0	WP_009901860.1
UAB_RS0204340	244.332	-1.34172	0.196941	-6.81282	9.57e-12	6.35e-11	hypothetical protein	WP_009902060.1
UAB_RS0207725	2612.4	2.01511	0.296255	6.80196	1.03e-11	6.83e-11	phage portal protein	WP_009902432.1
UAB_RS0209090	4320.86	-0.774675	0.113943	-6.7988	1.05e-11	6.97e-11	hypothetical protein	WP_003436543.1
UAB_RS02000000219830	296.085	1.68796	0.248298	6.79813	1.06e-11	6.99e-11	C40 family peptidase	WP_009901329.1
UAB_RS0209080	1986.93	-0.732979	0.10784	-6.79692	1.07e-11	7.04e-11	histidinol dehydrogenase	WP_009902633.1
UAB_RS0206030	14468	1.14883	0.169257	6.78748	1.14e-11	7.5e-11	enoyl-CoA hydratase/isomerase family protein	WP_003437965.1
UAB_RS0218910	421.859	-0.978118	0.144192	-6.78345	1.17e-11	7.7e-11	cation transporter	WP_003425940.1
UAB_RS0207335	15528.1	-0.569258	0.0839618	-6.77997	1.2e-11	7.88e-11	ribonuclease J	WP_011861169.1
UAB_RS0207755	986.529	2.1023	0.310254	6.77607	1.23e-11	8.08e-11	DUF2634 domain-containing protein	WP_003438449.1
UAB_RS0205725	1720.74	-0.815646	0.120491	-6.76936	1.29e-11	8.45e-11	diguanylate cyclase	WP_025992022.1
UAB_RS0205960	4794.73	1.00964	0.149186	6.76764	1.31e-11	8.53e-11	AAA family ATPase	WP_009902249.1
UAB_RS0217010	4209.39	0.799536	0.118367	6.7547	1.43e-11	9.31e-11	SAM-dependent DNA methyltransferase	WP_009903559.1
UAB_RS0215870	261.84	-1.14811	0.170047	-6.75173	1.46e-11	9.49e-11	hypothetical protein	WP_009893748.1
UAB_RS0216185	61650.7	0.603212	0.0894407	6.74426	1.54e-11	9.97e-11	PRD domain-containing protein	WP_003432034.1
UAB_RS0210890	599.156	0.887775	0.131648	6.74354	1.55e-11	1e-10	HAMP domain-containing histidine kinase	WP_009897088.1
UAB_RS0212555	2679.59	0.744476	0.110477	6.73875	1.6e-11	1.03e-10	transcription antiterminator	WP_009903122.1
UAB_RS0216990	1905.72	0.858472	0.127621	6.7267	1.74e-11	1.12e-10	hypothetical protein	WP_009903555.1
UAB_RS0212520	933.163	0.82203	0.122217	6.72598	1.74e-11	1.12e-10	peptide MFS transporter	WP_003430410.1
UAB_RS0208870	551.186	1.5249	0.227082	6.7152	1.88e-11	1.21e-10	DUF2800 domain-containing protein	WP_009902594.1
UAB_RS0202795	91.6503	1.9459	0.290335	6.70227	2.05e-11	1.32e-10	0	WP_009901780.1
UAB_RS0209630	17294.4	-0.712427	0.106423	-6.6943	2.17e-11	1.39e-10	membrane protein	WP_009896827.1
UAB_RS0217005	3110.61	0.982656	0.146789	6.69434	2.17e-11	1.39e-10	restriction endonuclease subunit S	WP_003427601.1
UAB_RS0208890	520.206	1.4552	0.217453	6.692	2.2e-11	1.41e-10	DNA polymerase	WP_009902597.1
UAB_RS0219395	1103.46	-0.973153	0.145826	-6.67339	2.5e-11	1.59e-10	MATE family efflux transporter	WP_009898797.1
UAB_RS0219315	4573.41	0.75195	0.112744	6.66953	2.57e-11	1.63e-10	homocysteine S-methyltransferase family protein	WP_009903830.1
UAB_RS0206180	7508.94	-0.806981	0.121307	-6.6524	2.88e-11	1.83e-10	ABC transporter ATP-binding protein	WP_003438014.1
UAB_RS0205780	2005.41	-0.713505	0.107304	-6.64938	2.94e-11	1.87e-10	DNA-binding protein	WP_003437046.1
UAB_RS0205200	7874.89	0.62138	0.0935656	6.64111	3.11e-11	1.97e-10	universal stress protein	WP_003418487.1
UAB_RS0200895	13991.2	-0.549283	0.0828969	-6.62609	3.45e-11	2.18e-10	0	WP_009887799.1
UAB_RS0217000	850.508	0.860667	0.129936	6.62375	3.5e-11	2.21e-10	hypothetical protein	WP_009903557.1
UAB_RS0200880	10819	0.666382	0.100717	6.61639	3.68e-11	2.32e-10	0	WP_003425582.1
UAB_RS0204540	13515.3	-0.761908	0.115246	-6.61116	3.81e-11	2.4e-10	50S ribosomal protein L35	WP_003429729.1
UAB_RS0208880	129.809	1.86458	0.282212	6.607	3.92e-11	2.46e-10	DNA-directed RNA polymerase sigma-70 factor	WP_003429822.1
UAB_RS0215385	1057.24	-0.825465	0.125389	-6.58324	4.6e-11	2.88e-10	membrane protein	WP_004454079.1
UAB_RS0211345	686.248	-0.932399	0.141758	-6.57738	4.79e-11	3e-10	MerR family transcriptional regulator	WP_009902960.1
UAB_RS02000000220520	10334.7	-0.598036	0.0909302	-6.57687	4.8e-11	3e-10	ATP-dependent zinc metalloprotease FtsH	WP_009902792.1
UAB_RS0213690	212.477	1.17691	0.179339	6.56249	5.29e-11	3.3e-10	aminopeptidase P family protein	WP_009897674.1
UAB_RS0209625	40067.5	-0.67658	0.103269	-6.5516	5.69e-11	3.54e-10	nucleoside hydrolase	WP_009889571.1
UAB_RS0219235	1326.28	-0.747696	0.114244	-6.54472	5.96e-11	3.7e-10	RluA family pseudouridine synthase	WP_009892161.1
UAB_RS0209485	867.433	-0.699994	0.106969	-6.54387	5.99e-11	3.72e-10	helix-turn-helix transcriptional regulator	WP_004454500.1
UAB_RS0219565	928.958	-0.861684	0.131705	-6.54252	6.05e-11	3.75e-10	GntR family transcriptional regulator	WP_009903848.1
UAB_RS0210155	5189	0.608383	0.0930529	6.53804	6.23e-11	3.85e-10	lipoprotein	WP_003439536.1
UAB_RS0213885	18244.3	-0.558527	0.0854882	-6.53338	6.43e-11	3.97e-10	leucine--tRNA ligase	WP_009903223.1
UAB_RS0210990	6547.62	0.783154	0.120243	6.5131	7.36e-11	4.54e-10	DNA mismatch repair endonuclease MutL	WP_009902879.1
UAB_RS0204825	1815.5	-0.756894	0.116227	-6.5122	7.41e-11	4.56e-10	histidinol-phosphatase HisJ	WP_009902127.1
UAB_RS0218205	2104.67	0.756507	0.116335	6.50281	7.88e-11	4.84e-10	MATE family efflux transporter	WP_009903725.1
UAB_RS0215985	585.961	-0.750561	0.11556	-6.49498	8.3e-11	5.09e-10	ABC transporter ATP-binding protein	WP_009903384.1
UAB_RS0210150	4476.33	0.544998	0.0839436	6.49244	8.45e-11	5.17e-10	class I SAM-dependent RNA methyltransferase	WP_003423769.1
UAB_RS0205490	869.168	-0.807514	0.124408	-6.49086	8.53e-11	5.22e-10	sulfate/molybdate ABC transporter ATP-binding protein	WP_009895906.1
UAB_RS0206870	2406.95	0.624279	0.0962001	6.48938	8.62e-11	5.26e-10	DUF3795 domain-containing protein	WP_003437221.1
UAB_RS0216330	93.5604	1.77435	0.273756	6.48151	9.08e-11	5.53e-10	PTS transporter subunit EIIC	WP_009898124.1
UAB_RS0215915	1319.22	0.816476	0.125983	6.48086	9.12e-11	5.55e-10	type I-B CRISPR-associated endonuclease Cas1	WP_003439781.1
UAB_RS0206855	1563.64	0.690162	0.106624	6.47289	9.61e-11	5.84e-10	VOC family protein	WP_003437214.1
UAB_RS0209365	2130.33	0.863009	0.133615	6.45893	1.05e-10	6.39e-10	HpcH/HpaI aldolase/citrate lyase family protein	WP_009902679.1
UAB_RS0207200	2676.42	0.687899	0.106552	6.456	1.08e-10	6.51e-10	ribonuclease HII	WP_003438239.1
UAB_RS0202830	2659.78	-0.61837	0.0958511	-6.45136	1.11e-10	6.7e-10	0	WP_003421079.1
UAB_RS0213225	4740.96	-0.682711	0.105836	-6.45066	1.11e-10	6.72e-10	flavin reductase	WP_004454695.1
UAB_RS0209250	253.141	-1.29482	0.200757	-6.44967	1.12e-10	6.75e-10	GntR family transcriptional regulator	WP_003430051.1
UAB_RS0203090	106909	0.592575	0.0919019	6.44791	1.13e-10	6.82e-10	0	WP_003431407.1
UAB_RS0210925	1429.9	-0.858765	0.1332	-6.44716	1.14e-10	6.84e-10	class I SAM-dependent methyltransferase	WP_003435288.1
UAB_RS0217840	850.677	0.743184	0.115399	6.4401	1.19e-10	7.16e-10	sensor histidine kinase	WP_009903688.1
UAB_RS0218890	2381.52	0.921739	0.143314	6.4316	1.26e-10	7.56e-10	septation regulator SpoVG	WP_003421453.1
UAB_RS0218075	916.277	0.93468	0.145795	6.41092	1.45e-10	8.64e-10	4Fe-4S dicluster domain-containing protein	WP_003417046.1
UAB_RS0210175	7323.76	-0.661294	0.103184	-6.40887	1.47e-10	8.74e-10	argininosuccinate synthase	WP_003439524.1
UAB_RS0202270	690.78	0.97359	0.152028	6.40401	1.51e-10	9.01e-10	0	WP_009901726.1
UAB_RS0211850	1391.81	-0.761086	0.118862	-6.40313	1.52e-10	9.05e-10	bifunctional diguanylate cyclase/phosphodiesterase	WP_009903035.1
UAB_RS0205865	1081.41	-0.765938	0.119964	-6.38471	1.72e-10	1.02e-09	ABC transporter ATP-binding protein	WP_003437017.1
UAB_RS0210915	235.202	1.07431	0.168321	6.38247	1.74e-10	1.03e-09	ABC transporter ATP-binding protein	WP_009902864.1
UAB_RS0207705	163.881	1.45661	0.22874	6.36798	1.92e-10	1.13e-09	hypothetical protein	WP_003428183.1
UAB_RS0207610	5320.62	0.688991	0.108223	6.36641	1.94e-10	1.14e-09	glutamine synthetase	WP_003428202.1
UAB_RS2000000221710	200.452	1.28937	0.202722	6.36029	2.01e-10	1.19e-09	hypothetical protein	WP_009902584.1
UAB_RS0211625	1832.59	0.725044	0.114004	6.35981	2.02e-10	1.19e-09	AAA family ATPase	WP_009903000.1
UAB_RS0202590	3020.53	-0.658922	0.103677	-6.35552	2.08e-10	1.22e-09	0	WP_009901761.1
UAB_RS0215000	400.947	0.981401	0.154433	6.35487	2.09e-10	1.22e-09	Na+/H+ antiporter NhaC	WP_009903314.1
UAB_RS0209610	527.015	-0.964782	0.152025	-6.34621	2.21e-10	1.29e-09	flavodoxin domain-containing protein	WP_003430144.1
UAB_RS0207255	1040.27	-0.659756	0.103974	-6.34537	2.22e-10	1.3e-09	DNA-processing protein DprA	WP_003438264.1
UAB_RS0208400	777.129	0.710616	0.112226	6.33203	2.42e-10	1.41e-09	PAS domain-containing sensor histidine kinase	WP_009902532.1
UAB_RS0213490	22233	-0.880677	0.139098	-6.33134	2.43e-10	1.42e-09	30S ribosomal protein S21	WP_003416618.1
UAB_RS0214350	4848.15	-0.521423	0.082417	-6.32665	2.51e-10	1.46e-09	tryptophan--tRNA ligase	WP_004454934.1
UAB_RS0208885	249.022	1.32302	0.209442	6.31689	2.67e-10	1.55e-09	DUF2815 family protein	WP_009902596.1
UAB_RS0217955	2190.07	-0.784376	0.12426	-6.31238	2.75e-10	1.6e-09	hypothetical protein	WP_003417144.1
UAB_RS0214450	1100	1.14431	0.181392	6.30848	2.82e-10	1.63e-09	MFS transporter	WP_009903280.1
UAB_RS0209475	2704.62	-0.878703	0.139299	-6.30801	2.83e-10	1.64e-09	amidohydrolase family protein	WP_009896806.1
UAB_RS0209425	2820.94	0.67635	0.107316	6.30245	2.93e-10	1.69e-09	TerD family protein	WP_004454512.1
UAB_RS0218885	15533.2	-0.597378	0.0949256	-6.29312	3.11e-10	1.8e-09	bifunctional UDP-N-acetylglucosamine diphosphorylase/glucosamine-1-phosphate N-acetyltransferase GlmU	WP_009898727.1
UAB_RS0203025	1624.42	-0.806861	0.128235	-6.29204	3.13e-10	1.81e-09	0	WP_009895417.1
UAB_RS0217555	2137.23	-0.699181	0.111223	-6.28628	3.25e-10	1.87e-09	methyltransferase domain-containing protein	WP_003422084.1
UAB_RS0205580	13308.6	-0.805508	0.128175	-6.28443	3.29e-10	1.89e-09	cold-shock protein	WP_003418660.1
UAB_RS0200090	422.472	1.46539	0.233286	6.28151	3.35e-10	1.92e-09	phage tail protein	WP_009901337.1
UAB_RS0200150	257.985	1.74815	0.278309	6.28132	3.36e-10	1.92e-09	DUF2634 domain-containing protein	WP_009901339.1
UAB_RS0201515	600.208	-0.986183	0.157125	-6.27644	3.46e-10	1.98e-09	0	WP_003432476.1
UAB_RS0218410	2071.98	0.929039	0.148113	6.27252	3.55e-10	2.03e-09	precorrin-6A reductase	WP_003437730.1
UAB_RS0218405	5762.52	0.770948	0.122917	6.2721	3.56e-10	2.03e-09	cobalt-factor II C(20)-methyltransferase	WP_003437727.1
UAB_RS0205295	1721.15	1.16561	0.185846	6.2719	3.57e-10	2.03e-09	homocitrate synthase	WP_003418528.1
UAB_RS0218125	635.969	0.900564	0.143827	6.26144	3.81e-10	2.17e-09	prenyltransferase	WP_009903715.1
UAB_RS0207295	4877.81	-0.611373	0.0976871	-6.25849	3.89e-10	2.21e-09	tRNA 2-thiouridine(34) synthase MnmA	WP_003438277.1
UAB_RS0208855	144.419	1.65479	0.26473	6.25085	4.08e-10	2.31e-09	helix-turn-helix domain-containing protein	WP_003433509.1
UAB_RS0217875	738.693	-0.954661	0.152799	-6.24781	4.16e-10	2.35e-09	ferrous iron transport protein A	WP_003417194.1
UAB_RS0207145	4171.59	-0.557301	0.089284	-6.24189	4.32e-10	2.44e-09	putative DNA-binding protein	WP_003419333.1
UAB_RS0202340	1085.94	0.898199	0.143901	6.24178	4.33e-10	2.44e-09	0	WP_003420966.1
UAB_RS0219770	17584.3	-0.550249	0.0881672	-6.24098	4.35e-10	2.45e-09	chromosomal replication initiator protein DnaA	WP_162835941.1
UAB_RS0208610	1928.85	0.722128	0.115897	6.23079	4.64e-10	2.61e-09	gamma-glutamyltransferase	WP_009902554.1
UAB_RS0200850	559.679	-0.754414	0.121088	-6.2303	4.66e-10	2.61e-09	0	WP_004453983.1
UAB_RS0206440	4919.71	0.752998	0.120868	6.22993	4.67e-10	2.62e-09	Rne/Rng family ribonuclease	WP_003438072.1
UAB_RS0201510	1552.84	-0.596807	0.0958326	-6.2276	4.74e-10	2.65e-09	0	WP_009901594.1
UAB_RS0219495	94.3551	-1.50159	0.24138	-6.22083	4.95e-10	2.76e-09	CPBP family intramembrane metalloprotease	WP_003435750.1
UAB_RS0208025	1843.5	0.646423	0.103927	6.21996	4.97e-10	2.77e-09	diguanylate cyclase	WP_009902497.1
UAB_RS0211920	7092.22	-0.677052	0.108862	-6.21933	4.99e-10	2.78e-09	protein kinase	WP_003433984.1
UAB_RS0212160	8578.25	-0.766442	0.123278	-6.21719	5.06e-10	2.82e-09	cell wall-binding repeat-containing protein	WP_003433893.1
UAB_RS0200030	147.058	-1.56673	0.252017	-6.21675	5.08e-10	2.82e-09	0	0
UAB_RS0219610	1547.37	-0.904964	0.145617	-6.2147	5.14e-10	2.85e-09	0	0
UAB_RS0217585	6304.95	1.85202	0.29804	6.214	5.17e-10	2.86e-09	proline reductase cluster protein PrdD	WP_009903671.1
UAB_RS0208135	3723.72	-0.705891	0.113695	-6.20862	5.35e-10	2.96e-09	YitT family protein	WP_003429405.1
UAB_RS0209620	533.278	-0.867722	0.139839	-6.20517	5.46e-10	3.02e-09	TetR/AcrR family transcriptional regulator	WP_004454480.1
UAB_RS0200345	55.3373	2.62618	0.423348	6.20337	5.53e-10	3.05e-09	hypothetical protein	WP_009901455.1
UAB_RS0209390	2916.63	0.667119	0.107568	6.20184	5.58e-10	3.07e-09	DUF819 domain-containing protein	WP_009889545.1
UAB_RS0204935	3023.42	0.651576	0.105076	6.20101	5.61e-10	3.08e-09	GGDEF and EAL domain-containing protein	WP_009902142.1
UAB_RS0216355	5891.2	-0.669171	0.107932	-6.19992	5.65e-10	3.1e-09	ROK family transcriptional regulator	WP_009903434.1
UAB_RS0211350	908.637	-0.778664	0.125603	-6.19941	5.67e-10	3.11e-09	helix-turn-helix transcriptional regulator	WP_009902962.1
UAB_RS0211970	5682.33	0.554338	0.089427	6.19878	5.69e-10	3.11e-09	hypothetical protein	WP_003433970.1
UAB_RS0213170	319.515	-0.975494	0.157495	-6.19382	5.87e-10	3.21e-09	DUF3785 domain-containing protein	WP_009903174.1
UAB_RS0205600	639.442	-0.813769	0.131426	-6.19186	5.95e-10	3.24e-09	hypothetical protein	WP_003418667.1
UAB_RS0212905	41794.6	-0.542071	0.0875504	-6.19153	5.96e-10	3.25e-09	IMP dehydrogenase	WP_003423106.1
UAB_RS0205625	16198.7	0.776817	0.125552	6.18719	6.12e-10	3.33e-09	ABC transporter ATP-binding protein	WP_009895930.1
UAB_RS0214095	3012.75	0.554263	0.0897031	6.17887	6.46e-10	3.51e-09	Asp23/Gls24 family envelope stress response protein	WP_003431114.1
UAB_RS0200770	8997.81	-0.650878	0.105417	-6.17431	6.65e-10	3.61e-09	0	WP_009901540.1
UAB_RS0202255	1713.15	-0.88268	0.143399	-6.15542	7.49e-10	4.06e-09	0	WP_009901723.1
UAB_RS0219100	14557.5	-0.693557	0.112729	-6.15242	7.63e-10	4.13e-09	ECF transporter S component	WP_009903817.1
UAB_RS0200340	221.13	1.75891	0.28729	6.12242	9.22e-10	4.98e-09	hypothetical protein	WP_009901453.1
UAB_RS0214375	1958.35	-0.612527	0.100062	-6.12149	9.27e-10	5e-09	TetR/AcrR family transcriptional regulator	WP_004454936.1
UAB_RS0205195	9566.07	0.576664	0.0943831	6.10982	9.97e-10	5.37e-09	EAL domain-containing protein	WP_003437567.1
UAB_RS0217925	2705.43	0.827677	0.135633	6.10234	1.05e-09	5.62e-09	glycyl-radical enzyme activating protein	WP_003432388.1
UAB_RS0206875	2246.88	0.623787	0.102486	6.08655	1.15e-09	6.2e-09	YcxB family protein	WP_069187736.1
UAB_RS2000000221945	4009.97	0.761565	0.125203	6.08262	1.18e-09	6.34e-09	hypothetical protein	WP_004454926.1
UAB_RS0210380	3962.69	0.750682	0.123647	6.07116	1.27e-09	6.8e-09	peroxide stress protein YaaA	WP_003439442.1
UAB_RS0207265	18119.8	-0.678219	0.11178	-6.06744	1.3e-09	6.95e-09	GTP-sensing pleiotropic transcriptional regulator CodY	WP_003438268.1
UAB_RS0208690	300.978	1.05381	0.173782	6.06399	1.33e-09	7.09e-09	ATP phosphoribosyltransferase	WP_009902568.1
UAB_RS0207085	121.834	-1.5823	0.261103	-6.06005	1.36e-09	7.26e-09	hypothetical protein	WP_003419284.1
UAB_RS0204965	46.2253	2.55403	0.42156	6.05852	1.37e-09	7.32e-09	transcriptional regulator GutM	WP_003437466.1
UAB_RS0218790	29922.4	-0.645318	0.10663	-6.05191	1.43e-09	7.61e-09	HU family DNA-binding protein	WP_003421415.1
UAB_RS0216575	1091.62	-0.712059	0.117747	-6.04734	1.47e-09	7.82e-09	PTS glucose transporter subunit IIA	WP_003440003.1
UAB_RS0202780	135.249	1.67525	0.277119	6.04521	1.49e-09	7.91e-09	0	WP_003435920.1
UAB_RS0205950	5400.39	0.774413	0.128125	6.04418	1.5e-09	7.95e-09	helicase-exonuclease AddAB subunit AddA	WP_009902247.1
UAB_RS0209110	78.5443	1.94885	0.322775	6.03781	1.56e-09	8.26e-09	sugar ABC transporter ATP-binding protein	WP_009902638.1
UAB_RS0206475	574.237	-0.878912	0.145613	-6.03596	1.58e-09	8.34e-09	tyrosine-type recombinase/integrase	WP_003419093.1
UAB_RS0213180	345.215	1.06144	0.175905	6.03417	1.6e-09	8.42e-09	alpha-hydroxy-acid oxidizing protein	WP_009903176.1
UAB_RS0202680	1095.87	0.776564	0.128856	6.0266	1.67e-09	8.82e-09	0	WP_009888123.1
UAB_RS0205870	788.414	-0.967241	0.16053	-6.02529	1.69e-09	8.87e-09	ABC transporter permease	WP_003432157.1
UAB_RS0209435	3503.56	0.689208	0.114428	6.02305	1.71e-09	8.99e-09	lipoate--protein ligase	WP_004454510.1
UAB_RS0218625	1801.22	0.679208	0.112847	6.01882	1.76e-09	9.21e-09	hypothetical protein	WP_009892025.1
UAB_RS0206515	19002.8	-0.488161	0.0811532	-6.01529	1.8e-09	9.4e-09	acetate kinase	WP_003438096.1
UAB_RS0212965	1462.06	0.712136	0.11857	6.00605	1.9e-09	9.94e-09	aminopeptidase P family protein	WP_004454650.1
UAB_RS0200855	16618.3	0.818156	0.136305	6.0024	1.94e-09	1.01e-08	0	WP_003425597.1
UAB_RS0204390	1602.99	0.764612	0.127464	5.99866	1.99e-09	1.04e-08	0	WP_009902069.1
UAB_RS0203980	10578.1	-0.951892	0.158823	-5.9934	2.06e-09	1.07e-08	0	WP_003436863.1
UAB_RS0213285	6200.79	-0.549355	0.0921262	-5.96306	2.48e-09	1.29e-08	TolC family protein	WP_021416872.1
UAB_RS0203925	1682.33	-0.699506	0.117484	-5.95404	2.62e-09	1.36e-08	0	WP_009901997.1
UAB_RS0210585	3045.26	0.710534	0.119585	5.94167	2.82e-09	1.46e-08	N-acetylmuramoyl-L-alanine amidase	WP_009902826.1
UAB_RS0212420	708.171	-0.937509	0.158219	-5.92539	3.12e-09	1.61e-08	zinc ribbon domain-containing protein	WP_009893535.1
UAB_RS0205515	1904.48	0.811797	0.137327	5.91141	3.39e-09	1.75e-08	bifunctional ADP-dependent NAD(P)H-hydrate dehydratase/NAD(P)H-hydrate epimerase	WP_009892822.1
UAB_RS0214825	10489.5	-0.616048	0.104228	-5.91058	3.41e-09	1.76e-08	DUF3798 domain-containing protein	WP_004455011.1
UAB_RS0215305	3814.4	0.50233	0.0851699	5.89797	3.68e-09	1.9e-08	cell wall-binding protein Cwp11	WP_021368758.1
UAB_RS0209065	1206.62	-0.682762	0.115827	-5.89465	3.75e-09	1.93e-08	PAS domain-containing protein	WP_009902631.1
UAB_RS0206525	7584.94	-0.998251	0.169924	-5.87468	4.24e-09	2.18e-08	50S ribosomal protein L32	WP_003419113.1
UAB_RS0214730	18407.3	-0.609581	0.103796	-5.87288	4.28e-09	2.2e-08	phosphate propanoyltransferase	WP_003416023.1
UAB_RS0213765	2101.5	-0.652611	0.111431	-5.85665	4.72e-09	2.42e-08	argininosuccinate lyase	WP_009897688.1
UAB_RS0217930	2881.83	-0.7363	0.125809	-5.85253	4.84e-09	2.48e-08	trypsin-like peptidase domain-containing protein	WP_003435637.1
UAB_RS0208965	80.4784	1.80014	0.307643	5.8514	4.87e-09	2.49e-08	phage terminase large subunit	WP_207635050.1
UAB_RS0205090	4134.82	0.641143	0.109657	5.84681	5.01e-09	2.56e-08	HEAT repeat domain-containing protein	WP_003437523.1
UAB_RS0208695	480.003	0.965588	0.165209	5.84465	5.08e-09	2.59e-08	histidinol-phosphate transaminase	WP_009889400.1
UAB_RS02000000220225	560.065	-0.810805	0.138748	-5.84374	5.1e-09	2.6e-08	0	WP_003429517.1
UAB_RS0203005	623.068	-0.763232	0.130863	-5.83228	5.47e-09	2.78e-08	0	WP_009901790.1
UAB_RS0213815	4880.58	0.659249	0.11348	5.80939	6.27e-09	3.18e-08	PTS transporter subunit EIIC	WP_009890719.1
UAB_RS0207150	13634.8	-0.566306	0.097515	-5.80738	6.35e-09	3.22e-08	signal recognition particle protein	WP_003428334.1
UAB_RS0218420	3199.27	0.76019	0.131088	5.79909	6.67e-09	3.38e-08	cobalt-precorrin 5A hydrolase	WP_009903758.1
UAB_RS0216500	113.827	1.47571	0.254506	5.79835	6.7e-09	3.39e-08	PTS transporter subunit EIIC	WP_009903457.1
UAB_RS0218400	3804.15	0.845312	0.145817	5.79707	6.75e-09	3.41e-08	hydroxymethylbilane synthase	WP_003425719.1
UAB_RS0200995	114153	1.00102	0.172746	5.79478	6.84e-09	3.45e-08	0	WP_009895180.1
UAB_RS0202070	1775.06	-0.665537	0.115149	-5.77981	7.48e-09	3.77e-08	0	WP_003435002.1
UAB_RS0206250	2226.53	-0.794886	0.137751	-5.77044	7.91e-09	3.98e-08	hypothetical protein	WP_003428522.1
UAB_RS0212015	2485.93	-0.739208	0.12816	-5.76787	8.03e-09	4.03e-08	helix-turn-helix domain-containing protein	WP_009903061.1
UAB_RS0200195	93.2448	1.67864	0.291144	5.76567	8.13e-09	4.08e-08	hypothetical protein	WP_009901347.1
UAB_RS0208230	3164.7	0.692038	0.120047	5.76471	8.18e-09	4.09e-08	HD domain-containing protein	WP_009896384.1
UAB_RS0203910	2557.63	-0.639385	0.110912	-5.76477	8.18e-09	4.09e-08	0	WP_003429657.1
UAB_RS0200200	697.788	1.88338	0.326741	5.76414	8.21e-09	4.1e-08	phage capsid protein	WP_003429841.1
UAB_RS0205945	3935.42	0.677108	0.117514	5.76196	8.31e-09	4.15e-08	helicase-exonuclease AddAB subunit AddB	WP_009902245.1
UAB_RS0208705	271.411	1.17745	0.204379	5.76109	8.36e-09	4.16e-08	imidazole glycerol phosphate synthase subunit HisH	WP_003436678.1
UAB_RS0216300	1048.16	-0.638136	0.110797	-5.75951	8.44e-09	4.2e-08	FtsX-like permease family protein	WP_009903428.1
UAB_RS0212395	174.861	1.28121	0.222483	5.75871	8.48e-09	4.21e-08	hypothetical protein	WP_003433827.1
UAB_RS0215405	823.536	-0.677895	0.117802	-5.75452	8.69e-09	4.31e-08	GntR family transcriptional regulator	WP_009897978.1
UAB_RS0203015	404.576	-0.848152	0.147384	-5.7547	8.68e-09	4.31e-08	0	WP_009901791.1
UAB_RS0215165	35765.5	0.620479	0.107833	5.7541	8.71e-09	4.31e-08	cell wall-binding glycosyl-hydrolase Cwp19	WP_009897928.1
UAB_RS0215320	2054.23	-0.598972	0.104102	-5.75373	8.73e-09	4.31e-08	cell wall-binding protein Cwp9	WP_009897968.1
UAB_RS0205095	3758.61	0.781258	0.135885	5.7494	8.96e-09	4.42e-08	NUDIX hydrolase	WP_003437525.1
UAB_RS0209170	382.988	1.12844	0.196294	5.74871	8.99e-09	4.43e-08	hypothetical protein	WP_009902644.1
UAB_RS0211260	316.669	-1.07561	0.187404	-5.73949	9.5e-09	4.68e-08	GntR family transcriptional regulator	WP_003424232.1
UAB_RS0205245	317.222	-0.968626	0.168823	-5.73751	9.61e-09	4.72e-08	ABC transporter ATP-binding protein	WP_004454245.1
UAB_RS0218870	1825.09	0.614774	0.107192	5.73529	9.73e-09	4.78e-08	type II/IV secretion system protein	WP_009898724.1
UAB_RS0218110	3499.45	-0.640828	0.111809	-5.73145	9.96e-09	4.88e-08	flippase-like domain-containing protein	WP_003429718.1
UAB_RS0208865	255.57	1.21968	0.212968	5.72706	1.02e-08	5e-08	hypothetical protein	WP_009902591.1
UAB_RS0205300	4491.28	1.02125	0.178885	5.70898	1.14e-08	5.56e-08	aconitate hydratase	WP_004454235.1
UAB_RS0217120	146.829	1.35451	0.237353	5.70672	1.15e-08	5.63e-08	ABC transporter ATP-binding protein	WP_003433732.1
UAB_RS0202120	1907.72	-0.625816	0.109808	-5.69916	1.2e-08	5.87e-08	0	WP_025985731.1
UAB_RS0209990	7362.92	0.518657	0.0911477	5.69029	1.27e-08	6.18e-08	cell wall-binding cysteine protease Cwp13	WP_009902746.1
UAB_RS0217905	55.322	2.68693	0.472636	5.68499	1.31e-08	6.36e-08	PTS sugar transporter subunit IIB	WP_009903699.1
UAB_RS0208580	3701.55	-0.513125	0.0903575	-5.67883	1.36e-08	6.59e-08	ABC transporter ATP-binding protein	WP_003429754.1
UAB_RS0217950	789.257	-0.725634	0.127882	-5.67422	1.39e-08	6.76e-08	hypothetical protein	WP_003435631.1
UAB_RS0211885	64642.8	-0.47439	0.0836899	-5.66842	1.44e-08	6.98e-08	30S ribosomal protein S2	WP_003424537.1
UAB_RS0203945	24582.7	-0.518242	0.0915051	-5.66353	1.48e-08	7.18e-08	0	WP_009902000.1
UAB_RS0213835	34741.1	0.531428	0.0938398	5.66314	1.49e-08	7.18e-08	threonine ammonia-lyase	WP_009890721.1
UAB_RS0207195	7222.77	0.533475	0.0942643	5.65935	1.52e-08	7.34e-08	adenosylcobalamin-dependent ribonucleoside-diphosphate reductase	WP_003438236.1
UAB_RS0200320	858.285	1.76547	0.313279	5.63544	1.75e-08	8.42e-08	hypothetical protein	WP_009901445.1
UAB_RS0215875	579.74	-0.830378	0.148084	-5.60749	2.05e-08	9.88e-08	dipicolinate synthase subunit B	WP_003429956.1
UAB_RS0205495	706.8	-0.765476	0.136534	-5.60647	2.06e-08	9.93e-08	sugar O-acetyltransferase	WP_009888695.1
UAB_RS0218120	412.32	0.789739	0.1409	5.60495	2.08e-08	1e-07	DUF3786 domain-containing protein	WP_009903713.1
UAB_RS2000000221565	19087.8	1.44263	0.257419	5.60422	2.09e-08	1e-07	D-proline reductase (dithiol) protein PrdB	WP_011861888.1
UAB_RS2000000221580	3099.51	-0.807404	0.1441	-5.60308	2.11e-08	1.01e-07	aspartyl-phosphate phosphatase Spo0E family protein	WP_009891746.1
UAB_RS0205735	1838.3	-0.5529	0.0986774	-5.60311	2.11e-08	1.01e-07	ABC transporter substrate-binding protein	WP_009902212.1
UAB_RS0201095	49218.2	-0.615547	0.109951	-5.59838	2.16e-08	1.03e-07	0	WP_003436176.1
UAB_RS0208160	2041.5	0.726214	0.129838	5.59323	2.23e-08	1.06e-07	aminodeoxychorismate synthase component I	WP_003438631.1
UAB_RS0216420	1286.97	0.740163	0.132755	5.5754	2.47e-08	1.18e-07	restriction endonuclease subunit S	WP_009903440.1
UAB_RS0204220	17442.3	-0.860065	0.154347	-5.57229	2.51e-08	1.2e-07	0	WP_009902040.1
UAB_RS0203010	3860.39	-0.659362	0.118361	-5.57077	2.54e-08	1.21e-07	0	WP_003417310.1
UAB_RS0213920	9614.97	-0.505201	0.090766	-5.56597	2.61e-08	1.24e-07	TetR/AcrR family transcriptional regulator	WP_009903228.1
UAB_RS0208260	239.065	1.03143	0.185458	5.56151	2.67e-08	1.27e-07	HAMP domain-containing histidine kinase	WP_009902520.1
UAB_RS0203570	311.532	-1.05134	0.189321	-5.5532	2.8e-08	1.33e-07	0	WP_009901954.1
UAB_RS0205005	847.148	0.645905	0.116388	5.54957	2.86e-08	1.35e-07	RNA polymerase sporulation sigma factor SigF	WP_003418417.1
UAB_RS0209370	1503.24	0.685371	0.123615	5.54441	2.95e-08	1.39e-07	phosphoribosyltransferase domain-containing protein	WP_004454526.1
UAB_RS0209635	16722.5	-0.623218	0.112449	-5.54223	2.99e-08	1.41e-07	radical SAM protein	WP_009902717.1
UAB_RS0202275	4245.74	-0.645017	0.116412	-5.54082	3.01e-08	1.42e-07	0	WP_009901727.1
UAB_RS0205935	1097.61	0.757577	0.136838	5.53629	3.09e-08	1.45e-07	ATP-dependent helicase	WP_003437942.1
UAB_RS0204160	3133.37	-0.702996	0.1271	-5.53104	3.18e-08	1.5e-07	0	WP_170325011.1
UAB_RS0203375	641.754	0.675443	0.122152	5.52955	3.21e-08	1.51e-07	0	WP_009901899.1
UAB_RS0209470	595.651	0.750541	0.135914	5.52219	3.35e-08	1.57e-07	pyrimidine/purine nucleoside phosphorylase	WP_004454504.1
UAB_RS0201345	345.744	-1.35417	0.245631	-5.51303	3.53e-08	1.65e-07	0	0
UAB_RS0210465	562.842	-0.756029	0.137183	-5.51111	3.57e-08	1.67e-07	prephenate dehydrogenase	WP_003428643.1
UAB_RS0207935	1465.84	0.579537	0.105277	5.5049	3.69e-08	1.72e-07	amino acid adenylation domain-containing protein	WP_009902474.1
UAB_RS0215990	308.027	-0.781093	0.142047	-5.49882	3.82e-08	1.78e-07	ABC transporter permease	WP_009903386.1
UAB_RS0202800	137.162	1.20449	0.219092	5.49763	3.85e-08	1.79e-07	0	WP_009901781.1
UAB_RS0205190	2476.28	0.622155	0.113347	5.48893	4.04e-08	1.88e-07	flavodoxin family protein	WP_009902172.1
UAB_RS0213720	3602.07	-0.715934	0.130445	-5.48839	4.06e-08	1.88e-07	mannose-6-phosphate isomerase, class I	WP_004454782.1
UAB_RS0218710	1617.49	-0.63504	0.115806	-5.48366	4.17e-08	1.93e-07	low molecular weight protein arginine phosphatase	WP_003437844.1
UAB_RS0204585	740.898	-0.735513	0.134308	-5.47633	4.34e-08	2.01e-07	0	WP_003436804.1
UAB_RS0210580	2136.87	0.625039	0.114288	5.46899	4.53e-08	2.1e-07	hypothetical protein	WP_009902825.1
UAB_RS0208970	469.836	1.9378	0.354358	5.46848	4.54e-08	2.1e-07	hypothetical protein	WP_009902615.1
UAB_RS0217575	3509.57	1.7256	0.315963	5.46139	4.72e-08	2.18e-07	hypothetical protein	WP_003428088.1
UAB_RS0218905	894.864	-0.679256	0.124449	-5.45812	4.81e-08	2.22e-07	hypothetical protein	WP_003425938.1
UAB_RS0215760	271.12	0.979386	0.179437	5.45812	4.81e-08	2.22e-07	PTS sugar transporter subunit IIC	WP_003439696.1
UAB_RS0212565	1416.82	-0.605367	0.111026	-5.4525	4.97e-08	2.29e-07	sporulation integral membrane protein YtvI	WP_003440267.1
UAB_RS0203085	1513.89	0.655639	0.120266	5.4516	4.99e-08	2.29e-07	0	WP_009888217.1
UAB_RS0200875	2766.67	0.643236	0.118166	5.4435	5.22e-08	2.4e-07	0	WP_009901545.1
UAB_RS0211270	429.203	-0.955881	0.175685	-5.44087	5.3e-08	2.43e-07	ABC-2 transporter permease	WP_009902946.1
UAB_RS0205940	560.227	0.683548	0.125968	5.42635	5.75e-08	2.63e-07	PD-(D/E)XK nuclease family protein	WP_003428590.1
UAB_RS0201100	33558.3	-0.649378	0.119685	-5.42572	5.77e-08	2.64e-07	0	WP_003421180.1
UAB_RS0219230	1095.1	-0.684583	0.126223	-5.4236	5.84e-08	2.67e-07	class I SAM-dependent methyltransferase	WP_003434910.1
UAB_RS0210810	579.455	-0.856326	0.157912	-5.4228	5.87e-08	2.68e-07	hypothetical protein	WP_003424072.1
UAB_RS0213655	428.448	-0.822495	0.151717	-5.42124	5.92e-08	2.7e-07	MBL fold metallo-hydrolase	WP_009897667.1
UAB_RS0213475	13599.8	0.554458	0.1024	5.41464	6.14e-08	2.79e-07	ribosome-associated translation inhibitor RaiA	WP_009903196.1
UAB_RS0211480	1801.78	-0.556695	0.102834	-5.41355	6.18e-08	2.81e-07	BlaI/MecI/CopY family transcriptional regulator	WP_003428999.1
UAB_RS0212230	1232.46	-0.579233	0.106999	-5.41344	6.18e-08	2.81e-07	aldehyde dehydrogenase	WP_009903082.1
UAB_RS0210260	6476.9	0.600579	0.111115	5.40502	6.48e-08	2.94e-07	tyrosine-type recombinase/integrase	WP_025992027.1
UAB_RS0216065	516.484	0.777124	0.143821	5.40342	6.54e-08	2.96e-07	iron-containing alcohol dehydrogenase	WP_009903393.1
UAB_RS0208955	769.427	0.724311	0.134079	5.4021	6.59e-08	2.98e-07	hypothetical protein	WP_009902609.1
UAB_RS0208235	3381.62	0.744453	0.138201	5.38675	7.17e-08	3.24e-07	DUF1648 domain-containing protein	WP_009902515.1
UAB_RS0210435	837.497	-0.706888	0.131732	-5.36612	8.04e-08	3.63e-07	3-dehydroquinate synthase	WP_009893310.1
UAB_RS0215920	412.873	1.01285	0.188787	5.36505	8.09e-08	3.65e-07	CRISPR-associated protein Cas4	WP_021359714.1
UAB_RS0203680	3160.35	-0.547369	0.102037	-5.36439	8.12e-08	3.66e-07	0	WP_003439079.1
UAB_RS0208265	189.703	1.07854	0.201258	5.35901	8.37e-08	3.76e-07	ABC transporter ATP-binding protein	WP_003438655.1
UAB_RS0214515	1155.05	0.617665	0.115276	5.35814	8.41e-08	3.78e-07	peptidoglycan editing factor PgeF	WP_011861621.1
UAB_RS0218935	248.482	-0.854864	0.159588	-5.35669	8.48e-08	3.8e-07	putative 2-aminoethylphosphonate ABC transporter substrate-binding protein	WP_009898733.1
UAB_RS0208800	137.146	1.37737	0.257288	5.35342	8.63e-08	3.87e-07	helix-turn-helix transcriptional regulator	WP_003429807.1
UAB_RS0216020	4096.48	-0.468424	0.0875785	-5.34862	8.86e-08	3.96e-07	ABC transporter ATP-binding protein	WP_004453865.1
UAB_RS0218345	6129.47	0.546702	0.10254	5.3316	9.74e-08	4.35e-07	excinuclease ABC subunit UvrC	WP_003436264.1
UAB_RS0207405	2573.23	-0.64655	0.121271	-5.33146	9.74e-08	4.35e-07	MazG-like family protein	WP_003428248.1
UAB_RS0205255	478.75	-0.943567	0.177233	-5.32389	1.02e-07	4.53e-07	ABC transporter permease	WP_004454242.1
UAB_RS0202835	648.841	-0.762935	0.143333	-5.3228	1.02e-07	4.55e-07	0	WP_009895379.1
UAB_RS0213905	1534.53	-0.590908	0.111094	-5.31899	1.04e-07	4.64e-07	recombination regulator RecX	WP_004454825.1
UAB_RS0213895	2022.52	0.576317	0.108402	5.31648	1.06e-07	4.7e-07	bis(5'-nucleosyl)-tetraphosphatase (symmetrical) YqeK	WP_003431048.1
UAB_RS0209270	1279.26	-0.642858	0.120994	-5.31314	1.08e-07	4.78e-07	mechanosensitive ion channel	WP_009902661.1
UAB_RS0218055	2853.64	0.70959	0.13368	5.30814	1.11e-07	4.91e-07	NAD-dependent DNA ligase LigA	WP_009891779.1
UAB_RS0208575	13674	-0.469784	0.0885214	-5.30701	1.11e-07	4.93e-07	ABC transporter permease	WP_003429753.1
UAB_RS0200785	364.373	-0.906982	0.171006	-5.30381	1.13e-07	5.01e-07	0	0
UAB_RS0214580	6399.43	-0.510842	0.0965565	-5.2906	1.22e-07	5.38e-07	stage V sporulation protein E	WP_003426995.1
UAB_RS0204200	436.642	0.700774	0.132689	5.28132	1.28e-07	5.66e-07	0	WP_009902039.1
UAB_RS0213890	4089.78	-0.556171	0.105357	-5.27892	1.3e-07	5.72e-07	ribosome silencing factor	WP_003416416.1
UAB_RS0201405	2823.29	-0.506647	0.0960627	-5.27412	1.33e-07	5.87e-07	0	WP_009901583.1
UAB_RS0215580	760.502	0.710557	0.134959	5.26499	1.4e-07	6.16e-07	polymer-forming cytoskeletal protein	WP_009898014.1
UAB_RS0204520	366.015	-0.911235	0.173169	-5.2621	1.42e-07	6.25e-07	0	WP_009902091.1
UAB_RS0210140	2159.04	0.655496	0.124588	5.2613	1.43e-07	6.27e-07	DUF4253 domain-containing protein	WP_009902764.1
UAB_RS0215970	248.322	-0.862168	0.164363	-5.24551	1.56e-07	6.82e-07	HAMP domain-containing histidine kinase	WP_003439799.1
UAB_RS0217900	33.2497	3.08871	0.588882	5.24504	1.56e-07	6.83e-07	PTS mannose transporter subunit IIA	WP_003432377.1
UAB_RS0205805	248.838	0.857742	0.163824	5.23575	1.64e-07	7.18e-07	response regulator transcription factor	WP_003437036.1
UAB_RS0201310	229.108	-1.29541	0.247578	-5.23233	1.67e-07	7.3e-07	0	0
UAB_RS02000000220440	689.371	1.08455	0.207915	5.21632	1.83e-07	7.95e-07	virulence-associated E domain protein	WP_009902598.1
UAB_RS0200750	7404.56	-0.572099	0.10976	-5.21229	1.87e-07	8.12e-07	0	WP_009901537.1
UAB_RS0215080	7081.49	-0.454633	0.0873809	-5.20289	1.96e-07	8.53e-07	thioether cross-link-forming SCIFF peptide maturase	WP_003426456.1
UAB_RS0215035	10533	0.662451	0.12734	5.2022	1.97e-07	8.55e-07	histidine--tRNA ligase	WP_003422928.1
UAB_RS0218860	1388.62	0.564994	0.108849	5.19062	2.1e-07	9.08e-07	PilN domain-containing protein	WP_003437881.1
UAB_RS0212240	1157.74	-0.641249	0.123538	-5.19069	2.1e-07	9.08e-07	MarR family transcriptional regulator	WP_009903083.1
UAB_RS0214995	364.205	0.841592	0.162388	5.18261	2.19e-07	9.47e-07	pyridoxal phosphate-dependent aminotransferase	WP_009897908.1
UAB_RS0200505	1437.56	-0.686935	0.132747	-5.17475	2.28e-07	9.87e-07	hypothetical protein	WP_009898407.1
UAB_RS0213050	6722.15	0.472812	0.091479	5.16853	2.36e-07	1.02e-06	ABC transporter permease	WP_003430774.1
UAB_RS0208940	305.007	0.955713	0.185169	5.16131	2.45e-07	1.06e-06	hypothetical protein	WP_009902603.1
UAB_RS0217870	1289.69	-0.664254	0.129039	-5.14771	2.64e-07	1.14e-06	Gx transporter family protein	WP_009903693.1
UAB_RS0206970	10189.6	-0.677571	0.131685	-5.14539	2.67e-07	1.15e-06	TetR/AcrR family transcriptional regulator	WP_009902354.1
UAB_RS0218350	10436.6	0.550208	0.106966	5.14376	2.69e-07	1.16e-06	excinuclease ABC subunit UvrA	WP_003436266.1
UAB_RS0202975	234.748	-0.894439	0.173922	-5.14275	2.71e-07	1.16e-06	0	WP_003434825.1
UAB_RS0201975	4471.66	-0.519927	0.10134	-5.1305	2.89e-07	1.24e-06	0	WP_003434478.1
UAB_RS0215955	398.796	-0.758934	0.147967	-5.12907	2.91e-07	1.25e-06	ABC transporter permease	WP_009903379.1
UAB_RS0218390	11433	0.415015	0.0809507	5.12676	2.95e-07	1.26e-06	porphobilinogen synthase	WP_009903754.1
UAB_RS0211450	19315.9	-0.467664	0.0913251	-5.12087	3.04e-07	1.3e-06	glutamine--tRNA ligase/YqeY domain fusion protein	WP_009902971.1
UAB_RS0207370	1819.95	-0.631413	0.123463	-5.11418	3.15e-07	1.34e-06	SMC-Scp complex subunit ScpB	WP_009902399.1
UAB_RS0204375	229.866	-0.888016	0.173648	-5.11388	3.16e-07	1.35e-06	0	WP_009895690.1
UAB_RS0201105	186523	-0.572183	0.112038	-5.10706	3.27e-07	1.39e-06	0	WP_003436178.1
UAB_RS0201090	93644.5	-0.504934	0.0989647	-5.10216	3.36e-07	1.43e-06	0	WP_003429485.1
UAB_RS0213915	13184.3	-0.512992	0.100661	-5.09624	3.46e-07	1.47e-06	alpha amylase C-terminal domain-containing protein	WP_009903226.1
UAB_RS0200885	6735.58	0.436124	0.0856029	5.09473	3.49e-07	1.48e-06	0	WP_004453976.1
UAB_RS0210930	1322.78	-0.787503	0.154619	-5.09318	3.52e-07	1.49e-06	TetR/AcrR family transcriptional regulator	WP_003435286.1
UAB_RS0216215	1902.43	-0.533132	0.104796	-5.08733	3.63e-07	1.54e-06	CarD family transcriptional regulator	WP_003432050.1
UAB_RS0206680	7011.33	0.572984	0.112855	5.07715	3.83e-07	1.62e-06	1-deoxy-D-xylulose-5-phosphate synthase	WP_009902302.1
UAB_RS0212505	2585.77	0.501789	0.0988735	5.07506	3.87e-07	1.64e-06	cupin domain-containing protein	WP_003440244.1
UAB_RS0219785	4443.55	-0.516047	0.101693	-5.07455	3.88e-07	1.64e-06	DNA replication/repair protein RecF	WP_003429303.1
UAB_RS0205185	1868.12	0.644272	0.127095	5.06922	3.99e-07	1.68e-06	0	WP_003437564.1
UAB_RS0203330	618.776	-0.678649	0.134226	-5.056	4.28e-07	1.8e-06	0	WP_085953674.1
UAB_RS0207960	1183.58	-0.591923	0.117193	-5.05084	4.4e-07	1.85e-06	transcriptional regulator DdlR	WP_009902483.1
UAB_RS2000000221225	3094.54	-1.72159	0.341226	-5.04532	4.53e-07	1.9e-06	0	WP_021378916.1
UAB_RS0216985	6761.44	0.634468	0.12589	5.03984	4.66e-07	1.96e-06	type I restriction endonuclease subunit R	WP_009903553.1
UAB_RS0211620	975.299	0.675347	0.134107	5.03588	4.76e-07	1.99e-06	McrC family protein	WP_009902998.1
UAB_RS0204650	4292.11	0.46492	0.0923861	5.03236	4.84e-07	2.03e-06	0	WP_003436880.1
UAB_RS0205305	2828.63	0.826844	0.164338	5.03135	4.87e-07	2.04e-06	0	WP_009902188.1
UAB_RS2000000221875	183.176	-0.879284	0.174862	-5.02846	4.94e-07	2.07e-06	0	WP_009888176.1
UAB_RS0212090	4569.99	-0.470673	0.0936867	-5.0239	5.06e-07	2.11e-06	molybdopterin-dependent oxidoreductase	WP_077726223.1
UAB_RS0210365	1582.58	-0.630441	0.125523	-5.02253	5.1e-07	2.13e-06	arsenic efflux protein	WP_003439447.1
UAB_RS0209980	31863.8	-0.416123	0.0828834	-5.02059	5.15e-07	2.14e-06	2-hydroxyacyl-CoA dehydratase	WP_004454390.1
UAB_RS0203715	586.276	0.610996	0.12172	5.01967	5.18e-07	2.15e-06	0	WP_009901983.1
UAB_RS02000000219920	25975.5	0.63791	0.127213	5.01451	5.32e-07	2.21e-06	hypothetical protein	WP_003429855.1
UAB_RS0219155	901.583	-0.585798	0.116878	-5.01204	5.39e-07	2.23e-06	DUF3794 domain-containing protein	WP_009898760.1
UAB_RS0218490	4538.14	0.631443	0.126012	5.01098	5.42e-07	2.24e-06	nicotinate-nucleotide--dimethylbenzimidazole phosphoribosyltransferase	WP_003437772.1
UAB_RS0219280	4761.91	0.557217	0.111379	5.00288	5.65e-07	2.34e-06	carbamoyl-phosphate synthase large subunit	WP_009903829.1
UAB_RS0214920	9256.24	-0.745842	0.149161	-5.00025	5.73e-07	2.37e-06	0	0
UAB_RS0208150	1338.53	0.623536	0.124813	4.99577	5.86e-07	2.42e-06	polysaccharide deacetylase family protein	WP_009896360.1
UAB_RS0218325	20644.6	0.475494	0.0953047	4.9892	6.06e-07	2.5e-06	NADH-quinone oxidoreductase subunit NuoF	WP_003416938.1
UAB_RS0218865	912.95	0.690187	0.138414	4.98638	6.15e-07	2.54e-06	type II secretion system F family protein	WP_009892080.1
UAB_RS0206675	1426.66	0.590689	0.118603	4.9804	6.35e-07	2.61e-06	divergent PAP2 family protein	WP_003428407.1
UAB_RS0218385	437.422	0.979457	0.196763	4.97785	6.43e-07	2.64e-06	bifunctional precorrin-2 dehydrogenase/sirohydrochlorin ferrochelatase	WP_009903753.1
UAB_RS0202075	518.05	-0.690972	0.138909	-4.97429	6.55e-07	2.69e-06	0	WP_003425354.1
UAB_RS0209265	1665.11	-0.568349	0.114413	-4.96753	6.78e-07	2.78e-06	MFS transporter	WP_009902660.1
UAB_RS0217385	2925.02	-0.522486	0.105239	-4.96474	6.88e-07	2.82e-06	nitroreductase family protein	WP_003434301.1
UAB_RS0210315	823.249	0.609999	0.122988	4.95981	7.06e-07	2.89e-06	MFS transporter	WP_025992028.1
UAB_RS0213340	171.403	-1.06158	0.214031	-4.95996	7.05e-07	2.89e-06	AraC family transcriptional regulator	WP_009903190.1
UAB_RS0218745	22372.4	0.490554	0.0992723	4.94149	7.75e-07	3.17e-06	transcription termination factor Rho	WP_003437851.1
UAB_RS0206370	7274.84	0.626065	0.126754	4.93921	7.84e-07	3.2e-06	rod shape-determining protein MreC	WP_009902282.1
UAB_RS0207995	3274.29	-0.51772	0.10483	-4.93865	7.87e-07	3.21e-06	TIGR01212 family radical SAM protein	WP_009902494.1
UAB_RS0207415	7554.37	-0.555761	0.11257	-4.93704	7.93e-07	3.23e-06	N-acetylglucosaminidase	WP_003438294.1
UAB_RS02000000219860	808.18	1.72066	0.34868	4.93478	8.02e-07	3.26e-06	minor capsid protein	WP_009901429.1
UAB_RS0204225	1034.7	-0.814064	0.165104	-4.93062	8.2e-07	3.33e-06	0	WP_003436086.1
UAB_RS02000000220420	2300.65	-0.486967	0.0990242	-4.91766	8.76e-07	3.55e-06	murein biosynthesis integral membrane protein MurJ	WP_009902536.1
UAB_RS0209910	241.106	-0.930625	0.189661	-4.90679	9.26e-07	3.75e-06	GntP family permease	WP_009902737.1
UAB_RS0213545	564.608	-0.772074	0.157381	-4.90577	9.31e-07	3.77e-06	helix-turn-helix domain-containing protein	WP_009903207.1
UAB_RS0205730	2725.1	-0.559242	0.114025	-4.90456	9.36e-07	3.79e-06	YgiQ family radical SAM protein	WP_003437073.1
UAB_RS0207425	1501.32	-0.534603	0.109029	-4.90333	9.42e-07	3.81e-06	ribosome maturation factor RimP	WP_003438303.1
UAB_RS0213585	400.476	-0.839416	0.171233	-4.90219	9.48e-07	3.83e-06	oxygen-independent coproporphyrinogen III oxidase	WP_009897649.1
UAB_RS0205240	1056.35	-0.696108	0.142512	-4.88455	1.04e-06	4.18e-06	0	WP_021404140.1
UAB_RS0218510	304.957	-0.823076	0.168547	-4.88336	1.04e-06	4.2e-06	pyridoxal phosphate-dependent aminotransferase	WP_003437779.1
UAB_RS0217835	312.884	0.802948	0.164562	4.8793	1.06e-06	4.28e-06	response regulator transcription factor	WP_003432361.1
UAB_RS0208840	131.943	1.69733	0.34883	4.86579	1.14e-06	4.58e-06	hypothetical protein	WP_009888812.1
UAB_RS0212485	234.369	-0.897677	0.184543	-4.86433	1.15e-06	4.61e-06	aspartate/glutamate racemase family protein	WP_009903112.1
UAB_RS0218130	269.333	-0.967924	0.199102	-4.86144	1.17e-06	4.67e-06	DUF1062 domain-containing protein	WP_009898497.1
UAB_RS0215120	2009.01	0.480872	0.0989849	4.85803	1.19e-06	4.75e-06	N-6 DNA methylase	WP_009897924.1
UAB_RS0212465	2538.35	-0.603376	0.124246	-4.8563	1.2e-06	4.79e-06	AI-2E family transporter	WP_003430436.1
UAB_RS0208910	323.729	1.0887	0.224268	4.85448	1.21e-06	4.83e-06	DEAD/DEAH box helicase	WP_009902599.1
UAB_RS02000000220730	20859.2	0.716857	0.147804	4.85006	1.23e-06	4.93e-06	hypothetical protein	WP_004454589.1
UAB_RS0210460	271.694	-0.787949	0.162474	-4.84968	1.24e-06	4.93e-06	shikimate kinase	WP_003439413.1
UAB_RS0213625	467.397	-0.685651	0.141397	-4.84912	1.24e-06	4.94e-06	helix-turn-helix domain-containing protein	WP_009897659.1
UAB_RS0208710	269.849	1.04411	0.215824	4.83778	1.31e-06	5.23e-06	1-(5-phosphoribosyl)-5-[(5-phosphoribosylamino)methylideneamino]imidazole-4-carboxamide isomerase	WP_003436675.1
UAB_RS0219325	1736.18	-0.477567	0.0987311	-4.83705	1.32e-06	5.24e-06	S-ribosylhomocysteine lyase	WP_003422312.1
UAB_RS0205235	1142.01	-0.599846	0.124052	-4.83546	1.33e-06	5.28e-06	0	WP_009888625.1
UAB_RS0201955	81.8414	1.30727	0.270459	4.83352	1.34e-06	5.32e-06	0	WP_009901681.1
UAB_RS0217605	42413.5	1.42251	0.294546	4.82951	1.37e-06	5.43e-06	D-proline reductase (dithiol) proprotein PrdA	WP_003422104.1
UAB_RS0204210	82.6714	1.35997	0.282243	4.81844	1.45e-06	5.73e-06	0	WP_003437697.1
UAB_RS0207235	167.03	-1.13048	0.234707	-4.81656	1.46e-06	5.78e-06	response regulator transcription factor	WP_009896181.1
UAB_RS0216375	544.89	0.607973	0.12625	4.81563	1.47e-06	5.8e-06	PTS sugar transporter subunit IIC	WP_009903435.1
UAB_RS0205340	18736.8	0.436855	0.0907971	4.81133	1.5e-06	5.92e-06	0	WP_004453621.1
UAB_RS0200155	38.4226	2.05524	0.427244	4.81046	1.51e-06	5.94e-06	DUF2577 domain-containing protein	WP_009901340.1
UAB_RS0216250	854.626	-0.562346	0.116983	-4.80709	1.53e-06	6.03e-06	MurR/RpiR family transcriptional regulator	WP_003439904.1
UAB_RS0217465	2364.01	-0.419024	0.0872043	-4.80508	1.55e-06	6.09e-06	Hsp33 family molecular chaperone HslO	WP_009903657.1
UAB_RS0211250	297.827	0.876397	0.182423	4.80419	1.55e-06	6.11e-06	hypothetical protein	WP_003435191.1
UAB_RS0203080	2505.34	0.549107	0.114583	4.79221	1.65e-06	6.48e-06	0	WP_009901804.1
UAB_RS0209185	103.044	1.22668	0.256318	4.78578	1.7e-06	6.68e-06	hydroxyethylthiazole kinase	WP_009902648.1
UAB_RS0200570	906.501	1.77837	0.371683	4.78464	1.71e-06	6.71e-06	phage tail sheath subtilisin-like domain-containing protein	WP_009901508.1
UAB_RS0205630	20883.6	0.641227	0.134134	4.78049	1.75e-06	6.84e-06	0	WP_009895932.1
UAB_RS0218415	1488.94	0.804852	0.16845	4.77798	1.77e-06	6.92e-06	precorrin-3B C(17)-methyltransferase	WP_009903755.1
UAB_RS0214910	17819.4	0.505612	0.105854	4.77648	1.78e-06	6.97e-06	SPOR domain-containing protein	WP_021403625.1
UAB_RS0213300	9434.14	0.394173	0.0825669	4.77398	1.81e-06	7.05e-06	kinase/pyrophosphorylase	WP_004454708.1
UAB_RS0200140	106.068	-1.39992	0.293262	-4.77361	1.81e-06	7.05e-06	0	0
UAB_RS0209985	14429.9	-0.455791	0.0956449	-4.76545	1.88e-06	7.33e-06	2-hydroxyglutaryl-CoA dehydratase	WP_004454389.1
UAB_RS0216540	1274.22	0.67525	0.141692	4.76562	1.88e-06	7.33e-06	6-phospho-beta-glucosidase	WP_009903464.1
UAB_RS0208165	944.803	0.580304	0.121817	4.76375	1.9e-06	7.38e-06	aminotransferase class IV	WP_009902511.1
UAB_RS0208155	732.749	0.763777	0.160456	4.76005	1.94e-06	7.51e-06	aminodeoxychorismate/anthranilate synthase component II	WP_009896362.1
UAB_RS0207855	1432.48	-0.676147	0.142164	-4.75612	1.97e-06	7.65e-06	helix-turn-helix transcriptional regulator	WP_003438473.1
UAB_RS0214310	1360.14	0.606888	0.127623	4.75532	1.98e-06	7.67e-06	histidine kinase	WP_004454923.1
UAB_RS0215765	132.157	1.23437	0.259659	4.75383	2e-06	7.72e-06	PTS sugar transporter subunit IIB	WP_003422688.1
UAB_RS2000000221155	205455	0.696659	0.146678	4.74959	2.04e-06	7.88e-06	0	0
UAB_RS0208985	143.942	1.24999	0.263418	4.74526	2.08e-06	8.04e-06	phage holin family protein	WP_009889440.1
UAB_RS0202865	518.653	-0.745896	0.15729	-4.74216	2.11e-06	8.16e-06	0	WP_009895383.1
UAB_RS0209305	397.925	-0.651537	0.137467	-4.7396	2.14e-06	8.25e-06	serine racemase VanT catalytic subunit	WP_009902670.1
UAB_RS0209050	1592.33	0.478701	0.10101	4.73915	2.15e-06	8.26e-06	SGNH/GDSL hydrolase family protein	WP_003436558.1
UAB_RS0200935	198.971	0.947711	0.200118	4.73575	2.18e-06	8.39e-06	0	WP_003425542.1
UAB_RS0208845	617.952	0.577221	0.122222	4.72272	2.33e-06	8.94e-06	hypothetical protein	WP_003433505.1
UAB_RS0201535	320.58	0.674982	0.143192	4.71384	2.43e-06	9.33e-06	0	WP_009901597.1
UAB_RS0215345	7258.82	-0.445905	0.0946613	-4.71053	2.47e-06	9.47e-06	tRNA guanosine(34) transglycosylase Tgt	WP_009903333.1
UAB_RS0210070	2230.95	0.47906	0.101703	4.71036	2.47e-06	9.47e-06	hypothetical protein	WP_004454365.1
UAB_RS0209105	64.2228	1.47752	0.314186	4.70269	2.57e-06	9.82e-06	hypothetical protein	WP_009902637.1
UAB_RS0209615	258.215	-0.889795	0.189484	-4.69589	2.65e-06	1.01e-05	FMN-binding protein	WP_004454481.1
UAB_RS0216775	776.031	-0.700607	0.149246	-4.69432	2.67e-06	1.02e-05	hypothetical protein	WP_009903507.1
UAB_RS0219210	128.051	0.978351	0.208584	4.69043	2.73e-06	1.04e-05	aminotransferase class I/II-fold pyridoxal phosphate-dependent enzyme	WP_009898770.1
UAB_RS0215995	603.253	-0.621258	0.132505	-4.68858	2.75e-06	1.05e-05	hypothetical protein	WP_009903387.1
UAB_RS0209280	102532	0.547598	0.116824	4.68738	2.77e-06	1.05e-05	FAD-dependent oxidoreductase	WP_003436400.1
UAB_RS0213330	51.0723	1.69546	0.361994	4.68368	2.82e-06	1.07e-05	PTS glucitol/sorbitol transporter subunit IIB	WP_004454715.1
UAB_RS0206320	2142.46	0.520311	0.111131	4.68195	2.84e-06	1.08e-05	hypothetical protein	WP_009902279.1
UAB_RS0211355	949.492	-0.601021	0.128548	-4.67544	2.93e-06	1.11e-05	TetR/AcrR family transcriptional regulator	WP_009902964.1
UAB_RS0204660	110730	0.506562	0.108477	4.66975	3.02e-06	1.14e-05	0	WP_003436882.1
UAB_RS0219430	2987	-0.522475	0.111889	-4.66957	3.02e-06	1.14e-05	GNAT family N-acetyltransferase	WP_003435776.1
UAB_RS0206840	193.472	0.899592	0.192795	4.66604	3.07e-06	1.16e-05	SrtB-anchored collagen-binding adhesin	WP_009902317.1
UAB_RS0201630	1109.48	0.516107	0.110685	4.66285	3.12e-06	1.18e-05	0	WP_009901610.1
UAB_RS0215040	8275.6	0.530786	0.114001	4.65596	3.22e-06	1.22e-05	coproporphyrinogen III oxidase	WP_009897917.1
UAB_RS0212135	2833.5	0.555909	0.119465	4.65332	3.27e-06	1.23e-05	glycoside hydrolase family 65 protein	WP_009903074.1
UAB_RS02000000220800	49542.3	0.700605	0.150609	4.65181	3.29e-06	1.24e-05	hypothetical protein	WP_004454815.1
UAB_RS0208180	4900.98	0.422466	0.090823	4.65153	3.29e-06	1.24e-05	dihydropteroate synthase	WP_003438639.1
UAB_RS0210605	743.125	-0.609968	0.13126	-4.64701	3.37e-06	1.27e-05	signal peptidase II	WP_009902829.1
UAB_RS0210255	1043.04	0.56817	0.122353	4.6437	3.42e-06	1.29e-05	hypothetical protein	WP_009902773.1
UAB_RS0202850	2873.65	0.521661	0.11244	4.63947	3.49e-06	1.31e-05	0	WP_003429705.1
UAB_RS0215260	1711.93	0.61795	0.133222	4.6385	3.51e-06	1.32e-05	cell wall-binding protein Cwp5	WP_009897945.1
UAB_RS0209885	670.062	0.571177	0.123177	4.63704	3.53e-06	1.32e-05	cobalamin-dependent protein	WP_004454419.1
UAB_RS0206125	424.22	0.82354	0.177646	4.63584	3.55e-06	1.33e-05	GntR family transcriptional regulator	WP_009896033.1
UAB_RS0203710	11927.7	0.396266	0.0855186	4.63368	3.59e-06	1.34e-05	0	WP_009901981.1
UAB_RS0215105	50404	-0.411449	0.0888799	-4.62927	3.67e-06	1.37e-05	phosphoenolpyruvate--protein phosphotransferase	WP_009897922.1
UAB_RS0201475	1746.78	-0.550857	0.119032	-4.62782	3.7e-06	1.38e-05	0	WP_003432453.1
UAB_RS0205660	671.074	-0.613646	0.132642	-4.62632	3.72e-06	1.39e-05	0	WP_003437111.1
UAB_RS0205480	816.239	-0.661016	0.142969	-4.6235	3.77e-06	1.4e-05	0	WP_009895904.1
UAB_RS0204460	14412.5	-0.519591	0.112387	-4.62325	3.78e-06	1.4e-05	0	WP_025992020.1
UAB_RS0218480	1573.44	0.546191	0.118411	4.61267	3.98e-06	1.48e-05	adenosylcobinamide-GDP ribazoletransferase	WP_003437766.1
UAB_RS0215625	1168.51	-0.560334	0.121503	-4.61169	3.99e-06	1.48e-05	putative ABC transporter permease	WP_009898025.1
UAB_RS0207635	3398.74	-0.469063	0.101734	-4.61067	4.01e-06	1.49e-05	lipoprotein	WP_003428196.1
UAB_RS0219255	298.402	-0.758335	0.164549	-4.60857	4.05e-06	1.5e-05	HAMP domain-containing histidine kinase	WP_009903824.1
UAB_RS0217580	1717.91	1.6036	0.34859	4.60024	4.22e-06	1.56e-05	D-proline reductase	WP_003422094.1
UAB_RS0218820	444.409	-0.693183	0.150795	-4.59685	4.29e-06	1.59e-05	aminoacyl-tRNA hydrolase	WP_009892068.1
UAB_RS0214510	1516.61	0.586564	0.127645	4.59527	4.32e-06	1.6e-05	response regulator transcription factor	WP_003416112.1
UAB_RS0219245	3480.93	-0.555001	0.120894	-4.59082	4.42e-06	1.63e-05	FtsX-like permease family protein	WP_009892169.1
UAB_RS0200610	409.906	1.88039	0.409995	4.58636	4.51e-06	1.66e-05	LysM peptidoglycan-binding domain-containing protein	WP_009901515.1
UAB_RS0214725	588579	-0.378699	0.0825858	-4.58551	4.53e-06	1.67e-05	pyruvate:ferredoxin (flavodoxin) oxidoreductase	WP_009897862.1
UAB_RS0211115	510.473	-0.728871	0.158988	-4.58445	4.55e-06	1.67e-05	SdpI family protein	WP_009902908.1
UAB_RS0216860	348.556	-0.714572	0.155981	-4.58116	4.62e-06	1.7e-05	hypothetical protein	WP_009903522.1
UAB_RS0201815	3466.92	-0.570416	0.124555	-4.57965	4.66e-06	1.71e-05	0	WP_009901654.1
UAB_RS0203770	3280.4	0.679327	0.148366	4.57874	4.68e-06	1.72e-05	0	WP_003425090.1
UAB_RS0203130	6581.24	0.37732	0.0825112	4.57296	4.81e-06	1.76e-05	0	WP_003434571.1
UAB_RS0204695	1827.02	-0.451587	0.0987755	-4.57185	4.83e-06	1.77e-05	0	WP_003432274.1
UAB_RS0206685	2333	0.565747	0.1238	4.56983	4.88e-06	1.78e-05	TlyA family rRNA (cytidine-2'-O)-methyltransferase	WP_003438136.1
UAB_RS0208850	50.4223	1.76143	0.385622	4.56776	4.93e-06	1.8e-05	helix-turn-helix transcriptional regulator	WP_009902588.1
UAB_RS0217610	3423.3	0.436616	0.0957366	4.56059	5.1e-06	1.86e-05	sigma-54 dependent transcriptional regulator PrdR	WP_003428097.1
UAB_RS0205220	1739.14	-0.615294	0.135125	-4.55351	5.28e-06	1.92e-05	0	WP_009902183.1
UAB_RS02000000221030	949.18	-0.532176	0.117006	-4.54827	5.41e-06	1.97e-05	Lrp/AsnC family transcriptional regulator	WP_003429149.1
UAB_RS0213335	34.3168	2.22629	0.489563	4.54751	5.43e-06	1.98e-05	PTS glucitol/sorbitol transporter subunit IIC	WP_003430863.1
UAB_RS0212140	501.978	0.874257	0.192319	4.54587	5.47e-06	1.99e-05	beta-phosphoglucomutase	WP_009903075.1
UAB_RS0202580	1272.85	-0.519731	0.114337	-4.5456	5.48e-06	1.99e-05	0	WP_003425215.1
UAB_RS0203640	536.109	-0.652939	0.143648	-4.54541	5.48e-06	1.99e-05	0	WP_009901967.1
UAB_RS0213935	1718.06	0.5168	0.113762	4.54282	5.55e-06	2.01e-05	AraC family transcriptional regulator	WP_009903231.1
UAB_RS0202870	615.751	-0.687578	0.151357	-4.54275	5.55e-06	2.01e-05	0	WP_009895384.1
UAB_RS0202860	654.02	-0.625665	0.137759	-4.54173	5.58e-06	2.02e-05	0	WP_003434217.1
UAB_RS0215055	9674.6	0.626977	0.138346	4.53195	5.84e-06	2.11e-05	bifunctional (p)ppGpp synthetase/guanosine-3',5'-bis(diphosphate) 3'-pyrophosphohydrolase	WP_003422921.1
UAB_RS0209825	1968.85	-0.608587	0.134355	-4.52971	5.91e-06	2.13e-05	1-acyl-sn-glycerol-3-phosphate acyltransferase	WP_004454428.1
UAB_RS0217390	1948.86	-0.53552	0.118324	-4.52588	6.01e-06	2.17e-05	hypothetical protein	WP_009898334.1
UAB_RS0201385	139.301	-1.3807	0.305316	-4.5222	6.12e-06	2.21e-05	0	0
UAB_RS0217640	8082.65	-0.42866	0.0949025	-4.51684	6.28e-06	2.26e-05	DUF4364 family protein	WP_009891708.1
UAB_RS0203300	645.728	0.671046	0.148577	4.51647	6.29e-06	2.26e-05	0	WP_009901879.1
UAB_RS0216695	404.657	-0.781898	0.173117	-4.5166	6.28e-06	2.26e-05	PRD domain-containing protein	WP_003440056.1
UAB_RS0213685	401.771	0.810788	0.17957	4.51517	6.33e-06	2.27e-05	PatB family C-S lyase	WP_009897672.1
UAB_RS0216410	373.302	0.777792	0.172286	4.51454	6.35e-06	2.28e-05	nucleotidyltransferase domain-containing protein	WP_003439944.1
UAB_RS0201085	82148.7	-0.476267	0.105544	-4.51249	6.41e-06	2.3e-05	0	WP_003436174.1
UAB_RS0218580	3169.53	-0.434803	0.0964428	-4.50841	6.53e-06	2.34e-05	S41 family peptidase	WP_003437815.1
UAB_RS0213735	3187.92	0.444057	0.0985674	4.5051	6.63e-06	2.37e-05	L-seryl-tRNA(Sec) selenium transferase	WP_004454789.1
UAB_RS0210880	1332	0.497727	0.110592	4.50057	6.78e-06	2.42e-05	FtsX-like permease family protein	WP_009902859.1
UAB_RS0201400	1473.43	-0.535235	0.118973	-4.49878	6.83e-06	2.44e-05	0	WP_003420697.1
UAB_RS0205655	362.276	-0.618179	0.137413	-4.4987	6.84e-06	2.44e-05	0	WP_009895936.1
UAB_RS0213305	8108.46	0.378287	0.0841513	4.49532	6.95e-06	2.47e-05	helix-turn-helix transcriptional regulator	WP_003416703.1
UAB_RS0211455	4913.39	0.442989	0.0987088	4.48784	7.19e-06	2.56e-05	YegS/Rv2252/BmrU family lipid kinase	WP_009902975.1
UAB_RS0209375	2533.93	0.541486	0.120657	4.4878	7.2e-06	2.56e-05	cysteine protease StiP family protein	WP_009902680.1
UAB_RS0205790	663.515	-0.619933	0.138162	-4.48699	7.22e-06	2.57e-05	0	WP_009902217.1
UAB_RS0201445	31829.7	-0.41905	0.0935425	-4.47978	7.47e-06	2.65e-05	0	WP_009901585.1
UAB_RS0210795	23176.8	0.494409	0.110915	4.45753	8.29e-06	2.94e-05	acetyl-CoA carboxylase biotin carboxylase subunit	WP_003435334.1
UAB_RS0211550	217.744	0.824565	0.185086	4.45503	8.39e-06	2.97e-05	molybdopterin-dependent oxidoreductase	WP_009902987.1
UAB_RS0203705	8430.03	0.372844	0.0837011	4.45447	8.41e-06	2.98e-05	0	WP_009901979.1
UAB_RS0210400	2572.07	-0.556366	0.124979	-4.45166	8.52e-06	3.01e-05	MarR family transcriptional regulator	WP_003428618.1
UAB_RS0218330	20373.2	0.453669	0.101956	4.44967	8.6e-06	3.04e-05	2Fe-2S iron-sulfur cluster binding domain-containing protein	WP_003429109.1
UAB_RS0217405	193.876	-0.981514	0.220693	-4.44743	8.69e-06	3.07e-05	PadR family transcriptional regulator	WP_009898339.1
UAB_RS0204815	6741.77	0.471069	0.105937	4.44668	8.72e-06	3.07e-05	0	WP_003418377.1
UAB_RS0210820	2382.33	-0.539487	0.121422	-4.44309	8.87e-06	3.12e-05	tRNA (guanosine(46)-N7)-methyltransferase TrmB	WP_009889910.1
UAB_RS0200775	2496.41	-0.574894	0.129403	-4.44266	8.89e-06	3.13e-05	0	WP_003421616.1
UAB_RS0212010	853.032	0.578433	0.130218	4.44204	8.91e-06	3.13e-05	L-lactate dehydrogenase	WP_003433957.1
UAB_RS0212075	7607.17	-0.431122	0.097132	-4.43851	9.06e-06	3.18e-05	amino acid ABC transporter permease	WP_009897328.1
UAB_RS0213955	244.864	0.826284	0.186267	4.43602	9.16e-06	3.21e-05	ABC transporter ATP-binding protein	WP_009903235.1
UAB_RS0205590	5823.61	-0.477733	0.107872	-4.42869	9.48e-06	3.32e-05	0	WP_009895925.1
UAB_RS0214240	2753.17	0.649268	0.146942	4.41852	9.94e-06	3.48e-05	guanylate kinase	WP_003431170.1
UAB_RS0211370	132.936	-0.995336	0.22533	-4.41724	1e-05	3.5e-05	DUF2975 domain-containing protein	WP_003435151.1
UAB_RS0215075	2961.79	-0.412879	0.0937019	-4.4063	1.05e-05	3.67e-05	gamma carbonic anhydrase family protein	WP_004454132.1
UAB_RS0219590	3655.94	-0.503264	0.114233	-4.4056	1.05e-05	3.68e-05	MBL fold metallo-hydrolase	WP_003435698.1
UAB_RS0210170	2668.46	0.428795	0.0973794	4.40335	1.07e-05	3.72e-05	tRNA pseudouridine(38-40) synthase TruA	WP_003430279.1
UAB_RS0209395	1924.45	0.44906	0.101982	4.40331	1.07e-05	3.72e-05	peptidase	WP_009889546.1
UAB_RS0212865	3193.62	0.499855	0.113551	4.40204	1.07e-05	3.73e-05	sigma 54-interacting transcriptional regulator	WP_009903145.1
UAB_RS0216245	6670	-0.514616	0.116951	-4.40028	1.08e-05	3.76e-05	transglutaminase domain-containing protein	WP_003439902.1
UAB_RS0215560	1840.72	-0.521575	0.118587	-4.39825	1.09e-05	3.79e-05	YhdH/YhfP family quinone oxidoreductase	WP_003436791.1
UAB_RS0211915	4442.8	-0.413734	0.0941773	-4.39315	1.12e-05	3.88e-05	RNA ligase RtcB family protein	WP_009903045.1
UAB_RS0219260	336.62	-0.74282	0.169088	-4.39309	1.12e-05	3.88e-05	response regulator transcription factor	WP_003434895.1
UAB_RS0208510	2613.53	0.403742	0.0920357	4.3868	1.15e-05	3.99e-05	GGDEF and EAL domain-containing protein	WP_009902545.1
UAB_RS0206005	1029.58	-0.608651	0.138869	-4.38293	1.17e-05	4.05e-05	0	WP_003437961.1
UAB_RS0218505	2545.63	-0.457348	0.104358	-4.38248	1.17e-05	4.06e-05	aldose 1-epimerase family protein	WP_009903770.1
UAB_RS0207480	37908.1	0.426177	0.0972589	4.38189	1.18e-05	4.07e-05	polyribonucleotide nucleotidyltransferase	WP_003438316.1
UAB_RS0208145	1288.29	0.558409	0.127698	4.3729	1.23e-05	4.23e-05	peptidase	WP_009902508.1
UAB_RS0207475	1639.12	-0.479362	0.109909	-4.36145	1.29e-05	4.46e-05	DegV family protein	WP_009889099.1
UAB_RS0206400	6055.56	-0.354239	0.0813251	-4.35584	1.33e-05	4.57e-05	rod shape-determining protein RodA	WP_009888916.1
UAB_RS0206965	19004.3	-0.583654	0.134027	-4.35474	1.33e-05	4.57e-05	alpha/beta hydrolase	WP_003434324.1
UAB_RS0207880	2963.33	-0.500754	0.114995	-4.35456	1.33e-05	4.57e-05	RidA family protein	WP_009902460.1
UAB_RS0208170	1307.05	0.566596	0.130106	4.35487	1.33e-05	4.57e-05	hypothetical protein	WP_009896367.1
UAB_RS0210895	389.758	0.622259	0.142882	4.35507	1.33e-05	4.57e-05	response regulator transcription factor	WP_009897090.1
UAB_RS0218255	334.933	-0.730309	0.167718	-4.35439	1.33e-05	4.57e-05	hypothetical protein	WP_009898526.1
UAB_RS0212355	266.079	-0.892935	0.205032	-4.35509	1.33e-05	4.57e-05	FUSC family protein	WP_009897400.1
UAB_RS0209590	1233.85	-0.52152	0.120134	-4.34115	1.42e-05	4.85e-05	helix-turn-helix transcriptional regulator	WP_003420359.1
UAB_RS0219250	741.221	-0.591481	0.136272	-4.34045	1.42e-05	4.86e-05	ABC transporter ATP-binding protein	WP_003426034.1
UAB_RS0215370	377.064	-0.6895	0.159127	-4.33302	1.47e-05	5.03e-05	crossover junction endodeoxyribonuclease RuvC	WP_003422814.1
UAB_RS0211065	230.593	-0.756176	0.17463	-4.33017	1.49e-05	5.09e-05	hypothetical protein	WP_009902896.1
UAB_RS0200325	58.8338	1.64124	0.379671	4.3228	1.54e-05	5.26e-05	hypothetical protein	WP_021359021.1
UAB_RS0216425	2154.69	0.482872	0.111833	4.31781	1.58e-05	5.37e-05	SAM-dependent DNA methyltransferase	WP_009903441.1
UAB_RS0206300	1570.46	-0.648288	0.150235	-4.31517	1.59e-05	5.43e-05	0	WP_003428495.1
UAB_RS0210815	663.632	-0.62749	0.145485	-4.3131	1.61e-05	5.48e-05	hypothetical protein	WP_003435330.1
UAB_RS0209180	131.146	0.929214	0.215568	4.31055	1.63e-05	5.54e-05	bifunctional hydroxymethylpyrimidine kinase/phosphomethylpyrimidine kinase	WP_009902646.1
UAB_RS0202935	5113.98	-0.373696	0.0867782	-4.30634	1.66e-05	5.64e-05	0	WP_003434191.1
UAB_RS0200175	54.5264	1.64744	0.382669	4.30513	1.67e-05	5.66e-05	hypothetical protein	WP_009901344.1
UAB_RS0206375	4824.98	0.588647	0.136767	4.30401	1.68e-05	5.69e-05	0	WP_003438053.1
UAB_RS0207655	1285.07	-0.441462	0.102645	-4.30088	1.7e-05	5.76e-05	two-component system sensor histidine kinase	WP_009902424.1
UAB_RS0208285	691.496	-0.682734	0.158925	-4.29596	1.74e-05	5.89e-05	rhodanese-like domain-containing protein	WP_003438666.1
UAB_RS0210375	3688.81	0.695982	0.162042	4.29507	1.75e-05	5.9e-05	thioredoxin-dependent thiol peroxidase	WP_003439443.1
UAB_RS0215785	211.747	-0.811812	0.189022	-4.2948	1.75e-05	5.91e-05	putative 2-aminoethylphosphonate ABC transporter permease subunit	WP_009903356.1
UAB_RS0200940	292.738	0.749857	0.17466	4.29323	1.76e-05	5.94e-05	0	WP_003425539.1
UAB_RS0210145	1720.22	0.445682	0.103846	4.29175	1.77e-05	5.98e-05	ATP-dependent sacrificial sulfur transferase LarE	WP_003439540.1
UAB_RS0203810	3355.89	-0.404751	0.0943325	-4.29068	1.78e-05	6e-05	0	WP_009888339.1
UAB_RS0214990	818.427	0.474666	0.110678	4.28873	1.8e-05	6.05e-05	sigma 54-interacting transcriptional regulator	WP_009897907.1
UAB_RS02000000219855	1181.38	-0.499981	0.11675	-4.2825	1.85e-05	6.21e-05	hypothetical protein	WP_009901354.1
UAB_RS0207515	1791.89	-0.513999	0.120042	-4.28184	1.85e-05	6.23e-05	tRNA 2-selenouridine(34) synthase MnmH	WP_009902410.1
UAB_RS0206405	4186.8	-0.382852	0.0896906	-4.26858	1.97e-05	6.6e-05	0	WP_009902283.1
UAB_RS0217510	20436.6	-0.336364	0.0788542	-4.26564	1.99e-05	6.68e-05	2,3,4,5-tetrahydropyridine-2,6-dicarboxylate N-acetyltransferase	WP_009903660.1
UAB_RS0214160	1470.58	0.569095	0.133436	4.26494	2e-05	6.7e-05	HAD family hydrolase	WP_009903260.1
UAB_RS0219795	14624	-0.435744	0.102302	-4.25937	2.05e-05	6.86e-05	DNA gyrase subunit A	WP_003429305.1
UAB_RS0213590	1106.12	-0.526174	0.123715	-4.25313	2.11e-05	7.05e-05	amino acid permease	WP_009897651.1
UAB_RS0205225	1914.56	-0.606858	0.142716	-4.25219	2.12e-05	7.07e-05	0	WP_009902185.1
UAB_RS0203165	723.09	0.655966	0.154648	4.24167	2.22e-05	7.41e-05	0	WP_009901819.1
UAB_RS0202880	435.034	-0.570779	0.134602	-4.24048	2.23e-05	7.44e-05	0	WP_009901784.1
UAB_RS0207240	105.896	-1.16369	0.274526	-4.2389	2.25e-05	7.48e-05	sensor histidine kinase	WP_009896183.1
UAB_RS0200635	1488.97	0.589627	0.139113	4.23846	2.25e-05	7.49e-05	hypothetical protein	WP_009894743.1
UAB_RS0219310	3162.89	-0.464533	0.109625	-4.23746	2.26e-05	7.52e-05	aminopeptidase	WP_003429165.1
UAB_RS0214305	884.895	0.527454	0.124548	4.23496	2.29e-05	7.6e-05	response regulator transcription factor	WP_009897796.1
UAB_RS0215280	4188.37	0.631869	0.149474	4.22729	2.37e-05	7.85e-05	PIG-L family deacetylase	WP_009897954.1
UAB_RS0211145	1343.08	-0.679799	0.160957	-4.22349	2.41e-05	7.98e-05	TetR/AcrR family transcriptional regulator	WP_003435217.1
UAB_RS0217470	962.543	-0.513569	0.121661	-4.22131	2.43e-05	8.05e-05	class I SAM-dependent methyltransferase	WP_009891672.1
UAB_RS0207825	1150.16	0.443555	0.10509	4.22073	2.44e-05	8.06e-05	glycerol kinase GlpK	WP_009902453.1
UAB_RS0206100	614.244	-0.728543	0.17268	-4.21903	2.45e-05	8.12e-05	0	WP_009888874.1
UAB_RS0218475	2653.96	0.360597	0.0854838	4.21831	2.46e-05	8.14e-05	histidine phosphatase family protein	WP_003437763.1
UAB_RS0219680	95915.7	0.365123	0.0866674	4.21292	2.52e-05	8.33e-05	PLP-dependent aminotransferase family protein	WP_003429271.1
UAB_RS0201455	1693.67	-0.581144	0.137994	-4.21138	2.54e-05	8.38e-05	0	WP_009901588.1
UAB_RS0217480	4320.48	-0.538008	0.127846	-4.20823	2.57e-05	8.48e-05	N-acetyldiaminopimelate deacetylase	WP_003438795.1
UAB_RS0215365	574.241	-0.524904	0.124779	-4.20668	2.59e-05	8.54e-05	Holliday junction branch migration protein RuvA	WP_003426582.1
UAB_RS0208755	2252.74	0.447571	0.106711	4.19422	2.74e-05	9.01e-05	xanthine dehydrogenase accessory factor	WP_009902575.1
UAB_RS0209960	657.299	-0.714396	0.170502	-4.18995	2.79e-05	9.17e-05	ferrous iron transport protein A	WP_003423664.1
UAB_RS0214820	772.181	-0.572121	0.136951	-4.17757	2.95e-05	9.68e-05	sigma 54-interacting transcriptional regulator	WP_009897877.1
UAB_RS0215855	1070.44	0.493691	0.118438	4.16836	3.07e-05	0.000100699	tRNA-binding protein	WP_003439746.1
UAB_RS0208700	234.809	0.900722	0.216236	4.16546	3.11e-05	0.000101896	imidazoleglycerol-phosphate dehydratase HisB	WP_009902569.1
UAB_RS0200105	40.6726	-1.84203	0.442922	-4.15881	3.2e-05	0.000104816	0	0
UAB_RS0212260	1181.28	-0.461571	0.111014	-4.15777	3.21e-05	0.000105203	MarR family transcriptional regulator	WP_003433857.1
UAB_RS0212305	3831.83	0.41688	0.100464	4.14956	3.33e-05	0.000108939	Crp/Fnr family transcriptional regulator	WP_009897384.1
UAB_RS0218425	2538.15	0.616327	0.148535	4.14938	3.33e-05	0.000108939	cobalt-precorrin-4 methyltransferase	WP_009891957.1
UAB_RS0207185	144.77	0.989012	0.238474	4.14725	3.36e-05	0.00010986	branched-chain amino acid transport system II carrier protein	WP_003438230.1
UAB_RS0213105	412.612	-0.584729	0.14113	-4.14319	3.43e-05	0.000111728	carbon starvation protein A	WP_009890565.1
UAB_RS0210065	669.715	-0.520468	0.125834	-4.13613	3.53e-05	0.000115116	DUF1294 domain-containing protein	WP_009896904.1
UAB_RS0215045	3365.52	0.512562	0.123991	4.13388	3.57e-05	0.00011615	MBL fold metallo-hydrolase	WP_004454137.1
UAB_RS0204865	872.016	-0.530527	0.128393	-4.13205	3.6e-05	0.000116979	0	WP_009895793.1
UAB_RS0202115	36127.9	-0.323569	0.0783268	-4.13101	3.61e-05	0.000117405	0	WP_003425341.1
UAB_RS0200890	3101.31	0.470449	0.113973	4.12773	3.66e-05	0.000118985	0	WP_003421245.1
UAB_RS0214430	12021	0.533517	0.129412	4.12264	3.75e-05	0.000121541	PFL family protein	WP_003426939.1
UAB_RS0219350	2404.91	-0.57311	0.139117	-4.11961	3.8e-05	0.000123043	metallophosphoesterase	WP_009903835.1
UAB_RS0204995	226.83	0.802507	0.194847	4.11864	3.81e-05	0.000123454	0	WP_003418414.1
UAB_RS0219700	7641.86	0.365029	0.088659	4.11722	3.83e-05	0.000124109	tetratricopeptide repeat protein	WP_009894114.1
UAB_RS0213235	2901.31	-0.411308	0.0999127	-4.11667	3.84e-05	0.0001243	2-thiocytidine tRNA biosynthesis protein TtcA	WP_009903184.1
UAB_RS0212500	4227.55	0.421966	0.102611	4.11229	3.92e-05	0.000126569	hypothetical protein	WP_003440238.1
UAB_RS0203940	1043.87	-0.479755	0.116706	-4.1108	3.94e-05	0.000127283	0	WP_003439009.1
UAB_RS0202495	1368.01	0.412086	0.100293	4.10882	3.98e-05	0.000128266	0	WP_009901743.1
UAB_RS0217050	139.632	0.937039	0.228081	4.10836	3.98e-05	0.000128412	hypothetical protein	WP_009903577.1
UAB_RS0201940	3103.23	-0.454254	0.110722	-4.10264	4.08e-05	0.000131513	0	WP_009901677.1
UAB_RS0208920	170.627	0.911415	0.222192	4.10192	4.1e-05	0.000131807	hypothetical protein	WP_003429831.1
UAB_RS0205120	17655.5	-0.32738	0.0799192	-4.09639	4.2e-05	0.000134883	0	WP_003437537.1
UAB_RS0207575	695.123	0.549245	0.134141	4.09452	4.23e-05	0.000135853	PTS transporter subunit EIIC	WP_009902415.1
UAB_RS0218875	2520.78	-0.519874	0.127299	-4.08387	4.43e-05	0.000142117	type II secretion system protein	WP_009903810.1
UAB_RS0216705	54.2435	1.78061	0.436112	4.08291	4.45e-05	0.000142583	beta-phosphoglucomutase	WP_009903495.1
UAB_RS0210250	2464	0.40574	0.0994668	4.07915	4.52e-05	0.000144697	TerD family protein	WP_003439494.1
UAB_RS0213770	2885.01	-0.411144	0.100793	-4.07909	4.52e-05	0.000144697	Cof-type HAD-IIB family hydrolase	WP_004454798.1
UAB_RS0208555	3820.45	-0.555705	0.136293	-4.07727	4.56e-05	0.000145706	DMT family transporter	WP_009902550.1
UAB_RS0211735	1562.08	0.436799	0.107139	4.07694	4.56e-05	0.000145785	copper-translocating P-type ATPase	WP_009903015.1
UAB_RS0211960	15288	0.32561	0.0800233	4.06894	4.72e-05	0.000150757	[FeFe] hydrogenase H-cluster radical SAM maturase HydE	WP_003433972.1
UAB_RS0210720	2213.4	-0.495301	0.121763	-4.06773	4.75e-05	0.000151407	MarR family transcriptional regulator	WP_009889887.1
UAB_RS0200250	5055.93	0.417722	0.1027	4.06738	4.75e-05	0.00015151	RNA polymerase sigma factor RpoD/SigA	WP_009889336.1
UAB_RS0207510	7730.84	-0.395411	0.0972248	-4.06698	4.76e-05	0.000151637	DNA translocase FtsK	WP_003438328.1
UAB_RS0216010	3303.76	0.492844	0.121192	4.06663	4.77e-05	0.000151739	class 1b ribonucleoside-diphosphate reductase subunit alpha	WP_004453866.1
UAB_RS0217600	5668	1.34583	0.331046	4.06539	4.8e-05	0.000152415	hypothetical protein	WP_003422102.1
UAB_RS0217125	413.4	0.634393	0.156105	4.0639	4.83e-05	0.000153263	YfbM family protein	WP_003433730.1
UAB_RS0218685	1792.23	-0.533847	0.131458	-4.06096	4.89e-05	0.000155071	AtpZ/AtpI family protein	WP_003421373.1
UAB_RS2000000221390	358.71	0.873694	0.215218	4.05958	4.92e-05	0.000155861	DUF4868 domain-containing protein	WP_079255099.1
UAB_RS0210075	2590.16	0.368195	0.090735	4.05792	4.95e-05	0.000156838	NUDIX hydrolase	WP_009889720.1
UAB_RS0204810	2687.6	0.472129	0.116355	4.05765	4.96e-05	0.000156887	0	WP_003418375.1
UAB_RS0218395	5190.29	0.53624	0.132165	4.05734	4.96e-05	0.000156956	uroporphyrinogen-III C-methyltransferase	WP_009898657.1
UAB_RS0215005	70.0061	1.30378	0.321379	4.05684	4.97e-05	0.000157162	hypothetical protein	WP_009903315.1
UAB_RS0204600	2189.73	-0.414366	0.102238	-4.05298	5.06e-05	0.000159646	0	WP_009888508.1
UAB_RS0208190	2103.82	0.411577	0.101632	4.04968	5.13e-05	0.000161775	2-amino-4-hydroxy-6-hydroxymethyldihydropteridine diphosphokinase	WP_009896372.1
UAB_RS0218115	785.973	-0.507013	0.125421	-4.04249	5.29e-05	0.000166673	two-component system response regulator CprR	WP_003437316.1
UAB_RS0208935	294.933	0.899597	0.222558	4.04208	5.3e-05	0.000166826	KTSC domain-containing protein	WP_009902602.1
UAB_RS0211880	51839.1	-0.354327	0.087688	-4.04077	5.33e-05	0.000167619	elongation factor Ts	WP_003424535.1
UAB_RS0206080	8181.47	-0.426117	0.105503	-4.0389	5.37e-05	0.000168815	0	WP_009888871.1
UAB_RS0205810	339.56	0.747191	0.185398	4.03019	5.57e-05	0.00017505	0	WP_003437034.1
UAB_RS0215880	98.7167	-1.04675	0.259749	-4.02986	5.58e-05	0.00017515	dipicolinate synthase subunit DpsA	WP_009898070.1
UAB_RS0201540	107.65	1.04468	0.259454	4.02647	5.66e-05	0.000177538	0	WP_009901599.1
UAB_RS0204525	878.279	-0.541077	0.134413	-4.02547	5.69e-05	0.000178149	0	WP_003429728.1
UAB_RS0214155	5520.09	0.447515	0.111289	4.0212	5.79e-05	0.000181256	nitroreductase family protein	WP_004454888.1
UAB_RS0216405	349.7	0.764821	0.190514	4.01452	5.96e-05	0.000186312	hypothetical protein	WP_003439943.1
UAB_RS0206600	12142.1	0.431959	0.107732	4.00958	6.08e-05	0.000190093	0	WP_009896112.1
UAB_RS0207005	334.362	-0.62837	0.157325	-3.9941	6.49e-05	0.000202774	class I SAM-dependent methyltransferase	WP_003434342.1
UAB_RS0211360	428.19	-0.55557	0.13915	-3.9926	6.54e-05	0.000203895	alpha/beta hydrolase	WP_009902966.1
UAB_RS0215315	173185	0.482331	0.120912	3.98912	6.63e-05	0.000206562	M60 family metallopeptidase	WP_009903330.1
UAB_RS0204630	209.371	-0.657538	0.164832	-3.98913	6.63e-05	0.000206562	0	WP_003436876.1
UAB_RS02000000219835	46.0766	2.02231	0.507087	3.9881	6.66e-05	0.000207279	hypothetical protein	WP_009901345.1
UAB_RS0210660	30.7626	1.71633	0.430608	3.98584	6.72e-05	0.000209088	ethanolamine ammonia-lyase subunit EutC	WP_009902836.1
UAB_RS0219285	1098.93	0.591143	0.148477	3.98138	6.85e-05	0.000212873	glutamine-hydrolyzing carbamoyl-phosphate synthase small subunit	WP_003435820.1
UAB_RS0208485	105.52	-0.943507	0.236999	-3.98106	6.86e-05	0.000212975	DUF2935 domain-containing protein	WP_003439363.1
UAB_RS0203230	247.25	-0.674808	0.169939	-3.97088	7.16e-05	0.000222105	0	WP_009901844.1
UAB_RS0214880	1382	-0.49311	0.124221	-3.96963	7.2e-05	0.000223087	DUF3800 domain-containing protein	WP_004455022.1
UAB_RS0217665	3032.74	-0.442702	0.111549	-3.96867	7.23e-05	0.000223798	two-component system response regulator RgaR	WP_003432343.1
UAB_RS0200985	1716.26	-0.441894	0.111392	-3.96703	7.28e-05	0.00022516	0	WP_009895177.1
UAB_RS0207025	253.476	0.749705	0.188997	3.96676	7.29e-05	0.000225221	RNA polymerase sigma factor	WP_006354941.1
UAB_RS0207140	2432.16	0.558078	0.140731	3.96555	7.32e-05	0.000226183	signal recognition particle-docking protein FtsY	WP_009902385.1
UAB_RS0205785	298.928	-0.740513	0.186756	-3.96514	7.34e-05	0.000226381	0	WP_003437044.1
UAB_RS0219320	873.433	0.603309	0.152164	3.96485	7.34e-05	0.000226474	Vitamin B12 dependent methionine synthase activation domain protein	WP_003435810.1
UAB_RS0214245	3456.53	0.559492	0.141165	3.9634	7.39e-05	0.000227662	YicC family protein	WP_009903268.1
UAB_RS0217915	1773.09	0.401179	0.101249	3.9623	7.42e-05	0.00022853	pyrroline-5-carboxylate reductase	WP_009898446.1
UAB_RS0211855	4115.26	-0.363916	0.0919674	-3.95701	7.59e-05	0.000233453	phosphatidate cytidylyltransferase	WP_003434000.1
UAB_RS0205485	200.44	-0.789825	0.199705	-3.95497	7.65e-05	0.000235259	0	WP_009888685.1
UAB_RS0217400	264.873	-0.644049	0.162967	-3.95202	7.75e-05	0.000237983	MarR family transcriptional regulator	WP_009903646.1
UAB_RS0206420	2901.33	-0.36323	0.0919165	-3.95174	7.76e-05	0.000238063	0	WP_009902285.1
UAB_RS0205930	826.457	0.50881	0.128797	3.95046	7.8e-05	0.000239139	0	WP_009902242.1
UAB_RS0217130	4785.26	0.490989	0.124299	3.95008	7.81e-05	0.00023933	ribonuclease R	WP_003434984.1
UAB_RS0212085	702.323	-0.495613	0.12558	-3.94659	7.93e-05	0.000242645	4Fe-4S binding protein	WP_003433927.1
UAB_RS0218635	693.901	0.497084	0.125972	3.94598	7.95e-05	0.000243056	holo-ACP synthase	WP_009903784.1
UAB_RS0207210	1757.55	0.494873	0.125437	3.94519	7.97e-05	0.000243458	hypothetical protein	WP_003419369.1
UAB_RS0212145	1064.49	0.64583	0.163696	3.9453	7.97e-05	0.000243458	alpha-glycosidase	WP_009897348.1
UAB_RS0205155	53.3012	1.44274	0.366224	3.93951	8.16e-05	0.000249098	0	WP_009895830.1
UAB_RS0218045	6688.11	0.410001	0.104158	3.93634	8.27e-05	0.000252203	metallophosphoesterase	WP_003435609.1
UAB_RS0215975	99.6126	-0.89639	0.227793	-3.93511	8.32e-05	0.000253289	response regulator transcription factor	WP_003429090.1
UAB_RS0203290	77.0454	1.11674	0.283827	3.93459	8.33e-05	0.000253626	0	WP_009901875.1
UAB_RS0205650	541.596	-0.547422	0.139256	-3.93106	8.46e-05	0.000257175	0	WP_003437117.1
UAB_RS0200715	20.7761	2.04768	0.521004	3.93025	8.49e-05	0.000257826	hypothetical protein	WP_009894710.1
UAB_RS2000000221585	381.221	-0.577396	0.146964	-3.92883	8.54e-05	0.000259143	hypothetical protein	WP_009903729.1
UAB_RS0204205	205.416	1.00704	0.256447	3.92687	8.61e-05	0.000261049	0	WP_003437698.1
UAB_RS0202815	1622.01	-0.429418	0.109649	-3.91631	8.99e-05	0.000272524	0	WP_003425144.1
UAB_RS0209115	44.9993	1.40554	0.358943	3.91578	9.01e-05	0.000272906	ABC transporter permease	WP_009889477.1
UAB_RS0207420	5680.66	0.3557	0.0912099	3.89979	9.63e-05	0.000291093	PolC-type DNA polymerase III	WP_003438301.1
UAB_RS0212155	322.776	-0.933132	0.239269	-3.89992	9.62e-05	0.000291093	hypothetical protein	WP_009903078.1
UAB_RS0202455	3561.96	-0.344102	0.0882623	-3.89863	9.67e-05	0.000292258	0	WP_009895327.1
UAB_RS0216535	1302.6	0.546323	0.140398	3.89125	9.97e-05	0.000301047	glycoside hydrolase family 1 protein	WP_009903462.1
UAB_RS0214980	588.348	-0.544379	0.14004	-3.88732	0.000101357	0.000305715	metal-sensitive transcriptional regulator	WP_003422948.1
UAB_RS0214590	6739.81	-0.335725	0.086464	-3.88283	0.000103246	0.000310405	phospho-N-acetylmuramoyl-pentapeptide-transferase	WP_003427000.1
UAB_RS0213260	4288.73	-0.402141	0.103567	-3.88291	0.000103212	0.000310405	dUTP diphosphatase	WP_004454700.1
UAB_RS0210455	560.27	-0.588767	0.151611	-3.88341	0.000103001	0.000310405	shikimate dehydrogenase	WP_009902802.1
UAB_RS0209700	322.074	0.874368	0.225168	3.88318	0.000103101	0.000310405	6,7-dimethyl-8-ribityllumazine synthase	WP_004454467.1
UAB_RS0219775	10707.8	-0.330727	0.0852699	-3.87859	0.000105062	0.00031561	DNA polymerase III subunit beta	WP_003420481.1
UAB_RS0216325	101.339	0.919199	0.237281	3.87388	0.000107115	0.000321516	6-phospho-alpha-glucosidase	WP_025992036.1
UAB_RS0210790	7823.07	0.480485	0.124172	3.86951	0.000109054	0.000327074	acetyl-CoA carboxylase carboxyltransferase subunit beta	WP_003424064.1
UAB_RS0206385	8884.66	0.474121	0.122626	3.86639	0.000110459	0.000331021	0	WP_003428479.1
UAB_RS0207985	786.219	0.473635	0.122781	3.85757	0.000114521	0.000342919	sigma 54-interacting transcriptional regulator	WP_009902485.1
UAB_RS0213400	4813.76	-0.339908	0.0881435	-3.8563	0.000115115	0.000344418	IclR family transcriptional regulator	WP_003416661.1
UAB_RS0204095	272.474	-0.62771	0.162881	-3.85378	0.000116306	0.000347703	0	WP_009902017.1
UAB_RS0214410	5723.02	0.362994	0.0942119	3.85296	0.000116701	0.000348603	cell division protein SepF	WP_003416162.1
UAB_RS0218320	3897.4	0.347146	0.0902328	3.84723	0.000119462	0.000356566	NAD(P)H-dependent oxidoreductase subunit E	WP_003416946.1
UAB_RS0212435	14658.8	-0.322471	0.0839232	-3.84246	0.000121807	0.000363274	asparagine--tRNA ligase	WP_003430444.1
UAB_RS0208760	1885.84	0.414836	0.108075	3.83841	0.000123833	0.000369022	M48 family metallopeptidase	WP_003436655.1
UAB_RS0207490	3598.32	0.382016	0.0997255	3.83067	0.000127796	0.000380524	insulinase family protein	WP_009902409.1
UAB_RS0217320	532.96	0.470309	0.123025	3.82289	0.000131899	0.000392429	AraC family transcriptional regulator	WP_003434289.1
UAB_RS0210245	4194.55	0.323929	0.0849648	3.81251	0.000137562	0.00040895	TerD family protein	WP_003430302.1
UAB_RS0211875	14798.4	0.493106	0.129353	3.81208	0.0001378	0.00040933	UMP kinase	WP_003430597.1
UAB_RS0209975	589.736	0.536506	0.140828	3.80965	0.000139164	0.000413052	EcsC family protein	WP_004454391.1
UAB_RS0218520	180.939	-0.770666	0.203094	-3.79463	0.000147866	0.000438533	PTS sugar transporter subunit IIC	WP_009891989.1
UAB_RS0204605	911.496	-0.452323	0.119226	-3.79383	0.000148339	0.000439583	0	WP_003418257.1
UAB_RS0217340	307.083	0.57663	0.152027	3.79294	0.000148872	0.000440812	multidrug efflux MFS transporter Cme	WP_009903634.1
UAB_RS0203965	761.568	-0.507644	0.133933	-3.79029	0.000150472	0.000445195	0	WP_009888369.1
UAB_RS0206315	20427.3	0.417438	0.11014	3.79006	0.000150611	0.000445226	0	WP_009896073.1
UAB_RS0215735	162.253	-0.890128	0.23487	-3.78988	0.000150721	0.000445226	ABC transporter substrate-binding protein	WP_009898056.1
UAB_RS0219035	2194.49	-0.556202	0.146845	-3.78768	0.000152063	0.000448833	HDIG domain-containing protein	WP_003435869.1
UAB_RS0212365	76.8598	1.11279	0.293877	3.7866	0.000152725	0.00045043	sulfite reductase subunit C	WP_003433832.1
UAB_RS0215680	2659.3	0.396909	0.105022	3.77931	0.000157265	0.000463453	TldD/PmbA family protein	WP_009898042.1
UAB_RS0203035	3775.17	-0.457417	0.12111	-3.77688	0.000158808	0.000467629	0	WP_003427789.1
UAB_RS0204215	2811.66	-0.662141	0.175391	-3.77523	0.000159862	0.000470362	0	WP_003418105.1
UAB_RS0206135	301.707	0.799536	0.211895	3.77326	0.000161129	0.000473713	0	WP_003437997.1
UAB_RS0219500	146.941	-0.731783	0.193969	-3.77268	0.000161502	0.000474436	MerR family transcriptional regulator	WP_003435749.1
UAB_RS0207500	4460.96	0.431892	0.114637	3.76748	0.000164903	0.000484044	aspartate kinase	WP_003438324.1
UAB_RS0203920	840.2	-0.434808	0.115422	-3.76711	0.000165146	0.000484376	0	WP_009901996.1
UAB_RS0204500	451.495	0.603019	0.160124	3.76596	0.000165913	0.000485861	0	WP_009902081.1
UAB_RS0205175	422.63	-0.635036	0.16862	-3.76607	0.000165834	0.000485861	0	WP_003437559.1
UAB_RS0210265	5917.44	0.349718	0.0930131	3.75988	0.000169992	0.000497415	tyrosine-type recombinase/integrase	WP_009902775.1
UAB_RS0206210	331.838	-0.575123	0.152988	-3.75926	0.000170417	0.000498266	0	WP_009902267.1
UAB_RS02000000220615	1140.92	0.500988	0.133288	3.75868	0.000170814	0.000498696	hypothetical protein	WP_003435240.1
UAB_RS0202260	341.445	-0.677833	0.180339	-3.75865	0.000170832	0.000498696	0	WP_009901724.1
UAB_RS0214140	312.202	0.553479	0.147449	3.7537	0.000174242	0.000508252	mannosylglycerate hydrolase	WP_009903258.1
UAB_RS0204950	92.9309	-0.958586	0.255679	-3.74918	0.000177411	0.00051709	0	WP_003437463.1
UAB_RS0209000	1060.39	0.60836	0.162351	3.7472	0.000178822	0.000520795	cell wall-binding repeat-containing protein	WP_009902620.1
UAB_RS0200510	2939.86	-0.380621	0.101587	-3.74676	0.000179131	0.000521287	hypothetical protein	WP_015984864.1
UAB_RS0216015	943.414	0.537869	0.143691	3.74323	0.000181667	0.000528253	pentapeptide repeat-containing protein	WP_009898087.1
UAB_RS0205980	5173.07	-0.42998	0.114897	-3.74231	0.000182337	0.000529787	0	WP_003437956.1
UAB_RS0209465	2045.47	-0.369456	0.0987667	-3.74069	0.000183513	0.000532789	HAD-IC family P-type ATPase	WP_009902690.1
UAB_RS0219420	464.287	-0.496651	0.132826	-3.73912	0.000184665	0.000535715	DUF2268 domain-containing protein	WP_021388762.1
UAB_RS0209450	114.531	-1.05905	0.283736	-3.7325	0.000189586	0.000549563	HXXEE domain-containing protein	WP_009902688.1
UAB_RS0214645	7127.03	-0.446126	0.119616	-3.72964	0.000191751	0.000555407	AraC family transcriptional regulator	WP_009897841.1
UAB_RS0218750	3086.51	0.380701	0.10208	3.72944	0.000191903	0.000555415	UTP--glucose-1-phosphate uridylyltransferase GalU	WP_009892053.1
UAB_RS0213230	2084.41	-0.404265	0.108406	-3.72918	0.000192105	0.000555568	exonuclease domain-containing protein	WP_009903183.1
UAB_RS0206175	2659.3	0.410867	0.11021	3.72802	0.000192989	0.000557689	0	WP_003428537.1
UAB_RS0214405	1374.47	0.382849	0.102712	3.72739	0.000193472	0.000558651	YggT family protein	WP_003416163.1
UAB_RS02000000220395	5265.46	0.33425	0.08984	3.7205	0.000198829	0.000573675	3-deoxy-7-phosphoheptulonate synthase	WP_003419887.1
UAB_RS0207115	31930.4	-0.379293	0.101994	-3.71879	0.000200182	0.000577133	0	WP_009889023.1
UAB_RS0215175	5517.77	-0.385572	0.103719	-3.71748	0.000201219	0.000579503	polysaccharide biosynthesis protein	WP_009897930.1
UAB_RS0203020	775.421	-0.462955	0.124539	-3.71736	0.000201316	0.000579503	0	WP_009901792.1
UAB_RS0203235	1429.67	-0.361951	0.0974025	-3.71604	0.000202371	0.00058209	0	WP_009901846.1
UAB_RS0218175	5716.59	0.383933	0.10345	3.71128	0.000206212	0.000592222	nitroreductase family protein	WP_003429152.1
UAB_RS0216730	230.12	0.779358	0.209994	3.71134	0.000206167	0.000592222	transcription antiterminator	WP_009903501.1
UAB_RS0219185	265.128	-0.623242	0.167966	-3.71052	0.000206832	0.000593544	UPF0489 family protein	WP_003434933.1
UAB_RS0204530	139.181	1.09666	0.295776	3.70775	0.000209111	0.000599622	0	WP_003439135.1
UAB_RS0205620	959.073	-0.502699	0.135645	-3.706	0.000210558	0.000603308	0	WP_003437134.1
UAB_RS0216235	10201.8	-0.406969	0.109838	-3.70518	0.000211237	0.000604787	proline iminopeptidase-family hydrolase	WP_003439900.1
UAB_RS0208585	12458.3	-0.382933	0.103368	-3.70456	0.000211759	0.000605815	efflux RND transporter periplasmic adaptor subunit	WP_003436742.1
UAB_RS0209945	356.797	-0.64093	0.173064	-3.70342	0.000212712	0.000608074	sensor histidine kinase	WP_009902739.1
UAB_RS0202595	2700.01	-0.452237	0.12231	-3.69747	0.000217757	0.000622019	0	WP_009901762.1
UAB_RS0214765	1885.77	-0.387739	0.104945	-3.6947	0.000220144	0.000628356	NAD(P)/FAD-dependent oxidoreductase	WP_009897869.1
UAB_RS0217655	6245.31	-0.367451	0.0995621	-3.69067	0.000223665	0.00063776	bifunctional folylpolyglutamate synthase/dihydrofolate synthase	WP_009903674.1
UAB_RS0218760	224.42	-0.622346	0.168633	-3.69054	0.000223781	0.00063776	stage II sporulation protein E	WP_003437858.1
UAB_RS0213055	1678.45	0.591611	0.160371	3.68901	0.000225126	0.0006411	hypothetical protein	WP_009897547.1
UAB_RS0211120	233.022	-0.624858	0.16941	-3.68843	0.000225643	0.000642082	winged helix-turn-helix transcriptional regulator	WP_009889969.1
UAB_RS0213205	1945.99	-0.496557	0.134679	-3.68696	0.000226948	0.000645303	B3/4 domain-containing protein	WP_004454689.1
UAB_RS0217140	268.407	0.620468	0.168485	3.68262	0.000230846	0.000655883	helix-turn-helix transcriptional regulator	WP_009898297.1
UAB_RS0208720	470.13	0.5566	0.15116	3.68218	0.000231247	0.000656524	bifunctional phosphoribosyl-AMP cyclohydrolase/phosphoribosyl-ATP diphosphatase HisIE	WP_003436669.1
UAB_RS0204125	529.954	-0.623177	0.169301	-3.68088	0.000232429	0.000659376	0	WP_009902025.1
UAB_RS0212100	5145.36	-0.415481	0.112926	-3.67925	0.00023392	0.0006631	alpha/beta hydrolase	WP_009890358.1
UAB_RS02000000220525	4701.71	0.352971	0.0959773	3.67765	0.00023539	0.000666759	hypothetical protein	WP_003428626.1
UAB_RS0209970	572.042	0.463361	0.126102	3.67451	0.000238309	0.000674514	adenosine deaminase	WP_004454392.1
UAB_RS0218440	2113.34	0.551229	0.150103	3.67234	0.000240341	0.000679749	cobalt-precorrin-5B (C(1))-methyltransferase	WP_009903760.1
UAB_RS0205230	1516.25	-0.494448	0.134713	-3.67039	0.000242185	0.000684443	0	WP_004454252.1
UAB_RS0210655	38.6402	1.51837	0.414257	3.66529	0.00024706	0.00069769	ethanolamine ammonia-lyase subunit EutB	WP_009902834.1
UAB_RS0206465	3928.48	-0.374895	0.102298	-3.66475	0.00024758	0.00069863	0	WP_003428464.1
UAB_RS0216685	1568.11	-0.403416	0.110173	-3.66167	0.000250578	0.000706554	6-phospho-beta-glucosidase	WP_009903488.1
UAB_RS0206660	1555.95	0.381833	0.104326	3.65999	0.000252228	0.000710668	0	WP_009902301.1
UAB_RS0211255	258.21	0.552424	0.151008	3.65824	0.000253955	0.000714994	replication/maintenance protein RepL	WP_003424231.1
UAB_RS0207280	1265.56	-0.37489	0.102557	-3.65542	0.00025676	0.000722342	0	WP_003419409.1
UAB_RS0206470	388.785	-0.546188	0.149543	-3.65237	0.000259829	0.000730427	0	WP_003438080.1
UAB_RS0200765	1152.04	-0.627926	0.17219	-3.6467	0.000265632	0.000746175	0	WP_009887752.1
UAB_RS0207840	3648.81	1.16925	0.320925	3.64337	0.000269088	0.000755313	divalent metal cation transporter	WP_003419704.1
UAB_RS0207700	76.0511	1.0187	0.279838	3.64033	0.000272293	0.000763734	helix-turn-helix transcriptional regulator	WP_003419641.1
UAB_RS0206310	2561.19	0.535639	0.147261	3.63734	0.000275466	0.00077205	0	WP_003419037.1
UAB_RS0212080	14368.5	-0.375603	0.103285	-3.63658	0.000276277	0.000773742	transporter substrate-binding domain-containing protein	WP_009897329.1
UAB_RS0201265	56995.8	-0.495136	0.136251	-3.634	0.000279064	0.000780959	0	WP_003427733.1
UAB_RS0218210	125.408	-0.841073	0.232016	-3.62506	0.000288889	0.000807848	ABC-2 family transporter protein	WP_021359900.1
UAB_RS0209595	430.902	-0.493051	0.136268	-3.61825	0.000296607	0.000828809	pyroglutamyl-peptidase I	WP_003430137.1
UAB_RS0210270	2768.03	-0.39813	0.11019	-3.61314	0.000302509	0.00084403	YitT family protein	WP_003430304.1
UAB_RS0216645	1565.94	0.340608	0.0942667	3.61324	0.000302393	0.00084403	PRD domain-containing protein	WP_009891460.1
UAB_RS0218430	1120.11	0.461839	0.127927	3.61016	0.000306007	0.000853151	decarboxylating cobalt-precorrin-6B (C(15))-methyltransferase	WP_009898664.1
UAB_RS0201270	11700.7	-0.594675	0.164742	-3.60974	0.000306505	0.000853902	0	WP_003421117.1
UAB_RS0214090	19450.9	0.319806	0.088712	3.60499	0.000312168	0.000869027	DAK2 domain-containing protein	WP_004454872.1
UAB_RS0217135	133.452	0.860494	0.238842	3.60277	0.000314839	0.000875809	DNA alkylation repair protein	WP_009903593.1
UAB_RS0218815	4244.52	-0.404038	0.112236	-3.59989	0.000318352	0.00088492	transcription-repair coupling factor	WP_003425912.1
UAB_RS0200100	52.9619	-1.40294	0.389803	-3.5991	0.000319321	0.000886951	0	0
UAB_RS0204230	122.739	-0.869366	0.241728	-3.59646	0.000322579	0.000895331	0	WP_009902041.1
UAB_RS0202575	230.316	-0.631845	0.175925	-3.59155	0.000328713	0.000911676	0	WP_009901759.1
UAB_RS0218485	1097.56	0.541859	0.150898	3.5909	0.00032954	0.000913288	bifunctional adenosylcobinamide kinase/adenosylcobinamide-phosphate guanylyltransferase	WP_009891982.1
UAB_RS0200740	1867.53	-0.445719	0.124173	-3.58949	0.000331326	0.000917556	0	WP_003426056.1
UAB_RS0216870	1262.53	-0.366568	0.102249	-3.58504	0.000337025	0.000932644	DUF4297 domain-containing protein	WP_009903524.1
UAB_RS0202825	621.648	-0.551474	0.153836	-3.58482	0.000337315	0.000932754	0	WP_009888171.1
UAB_RS0205250	214.254	-0.615746	0.172165	-3.57649	0.00034824	0.00096225	0	WP_004454243.1
UAB_RS0219160	17579.3	-0.392458	0.109811	-3.57394	0.000351643	0.000970931	Veg family protein	WP_009892135.1
UAB_RS0217415	344.456	-0.516074	0.144834	-3.56321	0.00036635	0.00101079	hypothetical protein	WP_009903648.1
UAB_RS0218220	80.0211	-0.978681	0.274804	-3.56138	0.000368913	0.0010171	ATP-binding cassette domain-containing protein	WP_009903727.1
UAB_RS0215780	2492.69	-0.36008	0.101179	-3.55885	0.000372477	0.00102617	GGDEF domain-containing protein	WP_003439713.1
UAB_RS0212380	827.898	-0.407275	0.114891	-3.54488	0.000392791	0.00108134	Crp/Fnr family transcriptional regulator	WP_003433829.1
UAB_RS0205085	3118.66	0.337293	0.0951641	3.54432	0.000393622	0.00108282	0	WP_009895824.1
UAB_RS0203765	1596.73	0.422882	0.119463	3.53987	0.000400325	0.00110045	0	WP_009895564.1
UAB_RS0213620	454.372	-0.51482	0.145556	-3.53693	0.000404813	0.00111196	alpha/beta hydrolase	WP_004454763.1
UAB_RS0219225	204.319	0.635578	0.179934	3.53229	0.00041198	0.00113082	DUF3298 and DUF4163 domain-containing protein	WP_009898771.1
UAB_RS0215335	204.06	-0.719063	0.203683	-3.5303	0.000415082	0.00113849	TIGR04086 family membrane protein	WP_004454083.1
UAB_RS0214230	18762.5	0.380688	0.108074	3.52246	0.00042756	0.00117185	bifunctional phosphopantothenoylcysteine decarboxylase/phosphopantothenate--cysteine ligase CoaBC	WP_004454901.1
UAB_RS0201910	294.615	0.558169	0.158652	3.51819	0.000434503	0.00119001	0	WP_003434446.1
UAB_RS0200870	871.937	0.406373	0.115714	3.51187	0.000444969	0.00121777	0	WP_003421255.1
UAB_RS0214415	6837.68	0.303452	0.0864709	3.5093	0.000449293	0.00122871	YggS family pyridoxal phosphate-dependent enzyme	WP_009893687.1
UAB_RS0207950	3299.96	-0.311161	0.0886895	-3.50843	0.000450756	0.0012318	ABC-F family ATP-binding cassette domain-containing protein	WP_021359140.1
UAB_RS0215910	329.706	0.661348	0.188627	3.50611	0.000454704	0.00124168	CRISPR-associated endonuclease Cas2	WP_003439780.1
UAB_RS0211510	401.849	-0.463275	0.132312	-3.50139	0.000462843	0.00126298	putative selenium-dependent hydroxylase accessory protein YqeC	WP_009902981.1
UAB_RS0213165	1969.72	-0.445115	0.127135	-3.50113	0.000463297	0.00126329	GGDEF domain-containing protein	WP_009903172.1
UAB_RS0209890	1234.71	0.400519	0.114517	3.49745	0.000469733	0.0012799	methyltransferase	WP_004454418.1
UAB_RS0205860	679.835	-0.638865	0.182832	-3.49428	0.000475351	0.00129426	0	WP_003418769.1
UAB_RS0209190	87.5191	1.03053	0.295264	3.4902	0.000482667	0.00131322	thiamine phosphate synthase	WP_009902650.1
UAB_RS0215435	4453.56	0.373665	0.107134	3.48782	0.00048697	0.00132396	alanine racemase	WP_009897984.1
UAB_RS0210385	23772.4	0.443782	0.127537	3.47964	0.000502096	0.00136409	cation-translocating P-type ATPase	WP_009902789.1
UAB_RS0200285	2581.02	-0.383373	0.110241	-3.47758	0.000505965	0.0013736	BlaI/MecI/CopY family transcriptional regulator	WP_009901435.1
UAB_RS0208815	344.886	0.591523	0.170288	3.47366	0.000513413	0.0013928	Arc family DNA-binding protein	WP_003429811.1
UAB_RS0215010	4241.28	0.340778	0.0981965	3.47037	0.000519737	0.00140893	cell wall-binding protein Cwp14	WP_009903316.1
UAB_RS0215585	616.743	0.554669	0.159897	3.46892	0.000522548	0.00141552	hypothetical protein	WP_009891149.1
UAB_RS0207535	49635.2	0.325902	0.0941525	3.46143	0.000537315	0.00145446	0	WP_003428216.1
UAB_RS0205060	796.443	0.590998	0.170876	3.45864	0.000542912	0.00146854	0	WP_003437515.1
UAB_RS0212390	405.723	0.462034	0.133718	3.45529	0.000549703	0.00148584	ROK family protein	WP_009903099.1
UAB_RS02000000220220	2760.36	-0.402398	0.116479	-3.45468	0.000550938	0.00148809	0	WP_009902023.1
UAB_RS0213040	11195.8	0.396599	0.114827	3.4539	0.000552547	0.00149135	ABC transporter ATP-binding protein	WP_003430772.1
UAB_RS0207135	5964.7	0.480509	0.139162	3.45288	0.000554644	0.00149593	0	WP_009902384.1
UAB_RS0205205	3995.99	0.355157	0.102913	3.45103	0.000558444	0.00150509	0	WP_003437569.1
UAB_RS0216995	511.768	0.629286	0.182429	3.44949	0.000561643	0.00151261	hypothetical protein	WP_003427598.1
UAB_RS0209015	72.9962	1.0357	0.300432	3.44736	0.000566094	0.0015235	manganese catalase family protein	WP_009896673.1
UAB_RS0212360	82.8953	0.913492	0.265245	3.44396	0.000573262	0.00154168	formate/nitrite transporter family protein	WP_009890410.1
UAB_RS0204820	5381.74	0.396243	0.115074	3.44336	0.000574525	0.00154396	0	WP_003432237.1
UAB_RS0202265	368.065	-0.537111	0.156007	-3.44286	0.000575588	0.0015457	0	WP_009901725.1
UAB_RS0207445	20946.7	0.467198	0.135736	3.44196	0.000577508	0.00154974	0	WP_003438306.1
UAB_RS0218245	41.9086	-1.23794	0.3604	-3.43491	0.000592753	0.0015895	RNHCP domain-containing protein	WP_009903734.1
UAB_RS0218770	1611.26	-0.348727	0.101552	-3.43397	0.000594812	0.00159387	septum formation initiator family protein	WP_003437861.1
UAB_RS0203805	10745.6	0.289832	0.084447	3.43211	0.000598897	0.00160366	0	WP_003439113.1
UAB_RS0203615	23.7719	1.76698	0.516706	3.41971	0.000626884	0.0016774	0	WP_009901963.1
UAB_RS0201495	226.938	0.711606	0.208194	3.418	0.000630834	0.00168676	0	WP_009887970.1
UAB_RS0210295	290.172	-0.566673	0.165814	-3.41752	0.000631946	0.00168852	carbohydrate kinase	WP_003439483.1
UAB_RS0208980	44.0239	1.59195	0.46585	3.41731	0.00063243	0.0016886	hemolysin XhlA family protein	WP_009902618.1
UAB_RS0202890	855.773	0.439994	0.128798	3.41617	0.000635087	0.00169448	0	WP_003434205.1
UAB_RS0213440	4227.97	0.39593	0.116013	3.41281	0.000642969	0.00171428	GTPase Era	WP_003416645.1
UAB_RS0203820	8247.11	-0.325277	0.0953558	-3.41119	0.000646795	0.00172324	0	WP_003439121.1
UAB_RS0207640	138.048	0.750641	0.220493	3.40438	0.000663135	0.00176551	0	WP_009902422.1
UAB_RS0203975	348.438	-0.500393	0.147051	-3.40284	0.000666884	0.00177423	0	WP_009902006.1
UAB_RS0212725	401.285	-0.535769	0.157526	-3.40114	0.000671046	0.00178402	hypothetical protein	WP_004454592.1
UAB_RS0215655	122.344	-1.11777	0.329309	-3.3943	0.000688054	0.00182793	membrane dipeptidase	WP_009898033.1
UAB_RS0209875	8082.42	-0.372867	0.109968	-3.39067	0.000697226	0.00185098	Mrp/NBP35 family ATP-binding protein	WP_003430209.1
UAB_RS0215255	1821.79	0.314121	0.092718	3.38792	0.000704257	0.00186831	DUF5009 domain-containing protein	WP_009903324.1
UAB_RS0206110	1829.35	0.328604	0.0971642	3.38195	0.000719738	0.00190802	0	WP_009896029.1
UAB_RS0209895	611.042	0.418513	0.12402	3.37456	0.000739333	0.00195857	hypothetical protein	WP_004454417.1
UAB_RS0219715	1208.11	0.50035	0.148489	3.36962	0.000752725	0.00199263	ParB/RepB/Spo0J family partition protein	WP_009903854.1
UAB_RS0213925	2072.08	-0.37958	0.11268	-3.36866	0.00075535	0.00199816	hypothetical protein	WP_004454829.1
UAB_RS0205500	228.389	-0.684049	0.203197	-3.36644	0.000761452	0.00201287	0	WP_003437194.1
UAB_RS0205215	127.037	1.01447	0.301372	3.36617	0.000762192	0.0020134	0	WP_009895838.1
UAB_RS0206565	33839.5	-0.274565	0.081685	-3.36126	0.000775877	0.0020481	0	WP_003438103.1
UAB_RS0209075	48.4555	-1.64544	0.489576	-3.36094	0.000776764	0.00204898	exosporium morphogenetic protein CdeM	WP_003436550.1
UAB_RS0217080	925.664	-0.412343	0.122753	-3.35913	0.00078188	0.00206102	hypothetical protein	WP_025992042.1
UAB_RS0203050	298.993	-0.548125	0.163755	-3.34722	0.000816274	0.00215016	0	WP_003427784.1
UAB_RS0208350	770.107	0.425483	0.127196	3.3451	0.00082254	0.00216513	ABC transporter permease subunit	WP_198133117.1
UAB_RS0203875	5149.13	-0.399297	0.119478	-3.34201	0.000831729	0.00218777	0	WP_003417965.1
UAB_RS0205400	353.03	-0.635179	0.190248	-3.33868	0.000841768	0.00221261	0	WP_004453602.1
UAB_RS0201250	21600	-0.4829	0.144655	-3.33829	0.000842962	0.00221419	0	WP_003421125.1
UAB_RS0209880	1120.07	0.42658	0.127831	3.33705	0.000846714	0.00222247	GNAT family N-acetyltransferase	WP_004454420.1
UAB_RS0214985	1144.15	-0.370252	0.111041	-3.33437	0.000854936	0.00224247	hypothetical protein	WP_003426410.1
UAB_RS0218340	4025.82	0.341795	0.102564	3.3325	0.000860695	0.00225599	HPr kinase/phosphorylase	WP_003416935.1
UAB_RS0217945	1616.21	-0.4169	0.125132	-3.33168	0.00086324	0.00226107	hypothetical protein	WP_009898461.1
UAB_RS0202960	177.623	-0.662595	0.1991	-3.32795	0.000874868	0.00228992	0	WP_009895403.1
UAB_RS0211110	5301.1	-0.405257	0.121787	-3.32759	0.00087602	0.00229132	carboxymuconolactone decarboxylase family protein	WP_003428889.1
UAB_RS0214560	1282.21	0.41395	0.124543	3.32376	0.000888118	0.00232133	DUF881 domain-containing protein	WP_009897825.1
UAB_RS0218235	127.815	-0.911963	0.274631	-3.32069	0.000897965	0.00234542	hypothetical protein	WP_009903730.1
UAB_RS0202845	309.105	0.531174	0.1601	3.31775	0.000907445	0.00236852	0	WP_003437587.1
UAB_RS0211870	11588.5	0.325153	0.0980605	3.31584	0.000913676	0.00238311	ribosome recycling factor	WP_003430598.1
UAB_RS0201450	38445.6	-0.329196	0.0993274	-3.31425	0.000918895	0.00239505	0	WP_003432446.1
UAB_RS0205975	4113.88	0.410325	0.12384	3.31334	0.000921876	0.00240114	0	WP_003437954.1
UAB_RS0213595	622.042	-0.39984	0.12073	-3.31186	0.000926772	0.0024122	CCA tRNA nucleotidyltransferase	WP_009897653.1
UAB_RS0219050	3552.72	-0.286488	0.0865255	-3.31102	0.000929552	0.00241774	stage 0 sporulation family protein	WP_003427637.1
UAB_RS0212270	1346.62	-0.362993	0.10965	-3.31047	0.000931384	0.00242082	carbonic anhydrase	WP_003423380.1
UAB_RS0200630	8405.42	0.357769	0.108129	3.30874	0.00093717	0.00243246	hypothetical protein	WP_009894744.1
UAB_RS0206270	215.084	-0.625294	0.188979	-3.30881	0.000936949	0.00243246	0	WP_003438037.1
UAB_RS0204325	3475.31	-0.371111	0.112395	-3.30186	0.000960468	0.00249119	0	WP_009892717.1
UAB_RS0215275	17188.7	0.418388	0.126886	3.29736	0.000975997	0.00252971	cell wall-binding repeat-containing protein	WP_009897952.1
UAB_RS0216640	3650.58	0.377851	0.11461	3.29684	0.000977799	0.00253261	PTS glucose transporter subunit IIA	WP_009903483.1
UAB_RS0218200	1126.09	-0.358962	0.108917	-3.29573	0.000981679	0.0025409	response regulator transcription factor	WP_003436222.1
UAB_RS0210865	276.289	-0.530157	0.161101	-3.29083	0.000998909	0.0025837	GNAT family N-acetyltransferase	WP_009889920.1
UAB_RS0218240	126.841	-0.745608	0.226843	-3.28689	0.00101299	0.00261829	ribosome small subunit-dependent GTPase A	WP_009903732.1
UAB_RS0205000	262.457	0.566892	0.172738	3.2818	0.00103148	0.00266424	0	WP_003418415.1
UAB_RS0217845	304.833	0.516816	0.1576	3.27929	0.00104067	0.00268611	response regulator transcription factor	WP_003417201.1
UAB_RS0206670	1597.68	0.519343	0.158389	3.2789	0.00104212	0.00268799	0	WP_009888951.1
UAB_RS0212415	155.47	0.927655	0.283011	3.27781	0.00104617	0.00269658	N-acetylmannosamine-6-phosphate 2-epimerase	WP_003433825.1
UAB_RS0205165	37.4626	1.42708	0.436432	3.26989	0.00107591	0.0027713	0	WP_003437555.1
UAB_RS0212560	1057.59	0.382888	0.117125	3.26904	0.00107912	0.00277764	tyrosine-protein phosphatase	WP_009890462.1
UAB_RS0216615	1733.69	-0.410177	0.125563	-3.26671	0.00108807	0.00279874	hypothetical protein	WP_021361066.1
UAB_RS0204920	4432	0.367554	0.112576	3.26494	0.00109486	0.00281428	0	WP_003432202.1
UAB_RS0206305	1308.94	-0.400863	0.122935	-3.26076	0.00111113	0.00285413	0	WP_003419035.1
UAB_RS0200930	157.43	0.746559	0.228979	3.26039	0.0011126	0.00285593	0	WP_009887810.1
UAB_RS0215145	1942.97	-0.343555	0.105483	-3.25697	0.0011261	0.00288859	DUF4358 domain-containing protein	WP_009891020.1
UAB_RS0218445	1716.65	0.429592	0.132021	3.25397	0.00113806	0.00291725	cobalt-precorrin-8 methylmutase	WP_009903761.1
UAB_RS0210100	332.945	-0.480294	0.147691	-3.25202	0.0011459	0.00293532	methylated-DNA--[protein]-cysteine S-methyltransferase	WP_009902761.1
UAB_RS0213730	5532.32	0.360902	0.111107	3.24825	0.00116116	0.00297239	selenocysteine-specific translation elongation factor	WP_004454786.1
UAB_RS0203890	914.905	-0.391525	0.120595	-3.2466	0.00116791	0.00298759	0	WP_009895581.1
UAB_RS0201395	11.5476	-2.23249	0.688382	-3.2431	0.00118237	0.00302251	0	0
UAB_RS0214885	45646.8	0.390301	0.120393	3.24189	0.00118738	0.00303324	cell wall-binding protein Cwp22	WP_009897890.1
UAB_RS0204880	2747.86	0.288094	0.0889144	3.24013	0.00119477	0.00305003	0	WP_009902135.1
UAB_RS0212070	8718.09	-0.355978	0.109924	-3.23841	0.001202	0.00306637	amino acid ABC transporter permease	WP_003433934.1
UAB_RS0214600	578.991	-0.588518	0.181958	-3.23437	0.00121912	0.00310792	stage V sporulation protein D	WP_009893708.1
UAB_RS0203440	1530.7	-0.427618	0.132326	-3.23154	0.00123124	0.00313668	0	WP_003434678.1
UAB_RS0208010	2547.94	0.377898	0.117007	3.22972	0.00123912	0.00315459	0	WP_032507408.1
UAB_RS0205965	7068.17	0.301262	0.0933457	3.22738	0.00124931	0.00317837	0	WP_009888861.1
UAB_RS0200420	380.762	0.62356	0.193418	3.22389	0.00126462	0.00321511	tape measure protein	WP_009901478.1
UAB_RS0219435	497.058	-0.448818	0.139237	-3.2234	0.00126676	0.00321836	YmaF family protein	WP_003435774.1
UAB_RS0216415	129.962	0.853623	0.264973	3.22155	0.00127501	0.0032371	hypothetical protein	WP_009903439.1
UAB_RS0215085	104.233	-0.886519	0.275258	-3.22068	0.00127885	0.00324463	cyclic lactone autoinducer peptide	WP_003426457.1
UAB_RS0213095	1136.41	0.421692	0.131253	3.21282	0.00131436	0.00333247	L-aspartate oxidase	WP_009903160.1
UAB_RS0215895	157.267	-0.626723	0.195247	-3.2099	0.00132781	0.00336428	biotin transporter BioY	WP_009891255.1
UAB_RS0216340	192.966	-0.673725	0.209985	-3.20845	0.00133451	0.00337895	peptidase S41	WP_009893779.1
UAB_RS0207545	5662.63	0.321612	0.100294	3.20669	0.00134271	0.00339739	0	WP_003438344.1
UAB_RS0211645	444.565	-0.551159	0.171914	-3.20602	0.00134583	0.00340297	hypothetical protein	WP_003433131.1
UAB_RS2000000221510	331.749	0.497467	0.15528	3.20368	0.00135683	0.00342845	tyrosine-type recombinase/integrase	WP_004454820.1
UAB_RS0211520	834.282	0.384086	0.119931	3.20256	0.0013621	0.00343945	molybdopterin-dependent oxidoreductase	WP_009902982.1
UAB_RS0203225	38.0486	-1.14937	0.358978	-3.2018	0.00136574	0.00344629	0	WP_009901842.1
UAB_RS0215375	41.7775	1.1861	0.370646	3.20009	0.00137385	0.00346441	hypothetical protein	WP_009897973.1
UAB_RS0210060	8672.66	-0.320532	0.100216	-3.19842	0.00138182	0.00348216	YjdF family protein	WP_004454369.1
UAB_RS0202965	268.516	-0.55423	0.173329	-3.19757	0.00138593	0.00349014	0	WP_009895404.1
UAB_RS0218570	2904.49	-0.295212	0.0923663	-3.1961	0.00139298	0.00350552	N-acetylglucosamine-6-phosphate deacetylase	WP_009903776.1
UAB_RS0210855	406.364	-0.531975	0.166544	-3.1942	0.00140218	0.0035263	HAMP domain-containing histidine kinase	WP_009902856.1
UAB_RS0203885	3610.42	-0.357635	0.112087	-3.1907	0.00141929	0.00356691	0	WP_009895580.1
UAB_RS0216545	1612.35	0.467559	0.14659	3.18957	0.00142484	0.00357845	PTS glucose transporter subunit IIA	WP_009903469.1
UAB_RS0213615	29.89	1.69107	0.530957	3.18496	0.00144775	0.00363354	GPR endopeptidase	WP_003430954.1
UAB_RS2000000221985	991.574	0.383306	0.12037	3.18439	0.0014506	0.00363823	hypothetical protein	WP_159444759.1
UAB_RS0203305	170.892	0.620398	0.194982	3.18182	0.00146352	0.00366815	0	WP_009901880.1
UAB_RS0210445	744.387	-0.41815	0.131465	-3.1807	0.00146922	0.00367996	chorismate synthase	WP_009902798.1
UAB_RS0206415	244.449	-0.575254	0.180969	-3.17875	0.00147914	0.00370232	0	WP_009902284.1
UAB_RS0218515	167.511	-0.669646	0.210896	-3.17524	0.0014971	0.00374477	aminopeptidase P family protein	WP_009903771.1
UAB_RS0214285	1007.98	-0.380859	0.119974	-3.17451	0.00150089	0.00375171	signal peptidase II	WP_004454916.1
UAB_RS0206750	411.715	0.46751	0.147349	3.1728	0.00150978	0.0037714	0	WP_009902311.1
UAB_RS0206130	97.7014	0.892885	0.28151	3.17178	0.0015151	0.00378216	0	WP_009896035.1
UAB_RS0202970	577.445	-0.396203	0.125083	-3.16752	0.00153748	0.00383545	0	WP_009895406.1
UAB_RS0214370	1406.56	-0.336327	0.106204	-3.16679	0.0015413	0.0038421	DegV family protein	WP_009890830.1
UAB_RS0205645	1285.14	-0.44839	0.141599	-3.16662	0.00154221	0.0038421	0	WP_003437120.1
UAB_RS0201340	32.0435	-1.36757	0.432165	-3.16446	0.00155373	0.00386821	0	0
UAB_RS0211085	2480.12	-0.341421	0.107919	-3.16369	0.00155785	0.00387588	cold-shock protein	WP_003431034.1
UAB_RS0216005	1301.75	0.326364	0.103209	3.16217	0.00156598	0.00389351	class 1b ribonucleoside-diphosphate reductase subunit beta	WP_003439817.1
UAB_RS0200735	1472.67	-0.351819	0.111293	-3.16118	0.0015713	0.00390368	0	WP_003435561.1
UAB_RS0216290	581.052	-0.454426	0.143759	-3.16102	0.00157217	0.00390368	HAMP domain-containing histidine kinase	WP_009903425.1
UAB_RS0207890	2434.45	-0.359291	0.11381	-3.15693	0.0015944	0.00395624	0	WP_003438480.1
UAB_RS0218850	308.845	0.519311	0.164614	3.15471	0.00160656	0.0039819	prepilin-type N-terminal cleavage/methylation domain-containing protein	WP_021402879.1
UAB_RS0216155	375.863	-0.447	0.141695	-3.15465	0.00160688	0.0039819	epoxyqueuosine reductase	WP_009903408.1
UAB_RS0216240	2673.08	-0.454325	0.14419	-3.15087	0.00162786	0.00403119	membrane protein	WP_003439901.1
UAB_RS0213275	5312.52	-0.293886	0.0932789	-3.15062	0.00162924	0.00403194	efflux RND transporter periplasmic adaptor subunit	WP_009897600.1
UAB_RS0201695	1178.21	-0.470234	0.149508	-3.14522	0.00165962	0.00410439	0	WP_009901626.1
UAB_RS0204840	215.715	0.579492	0.184285	3.14454	0.0016635	0.00411126	0	WP_009902130.1
UAB_RS0215310	50538.4	0.390842	0.124463	3.14023	0.00168817	0.00416392	cell wall-binding protein Cwp10	WP_009903328.1
UAB_RS0207130	1679.6	0.372323	0.118564	3.14027	0.00168793	0.00416392	0	WP_003438208.1
UAB_RS0203620	14.9138	-2.21675	0.705884	-3.14039	0.00168723	0.00416392	0	WP_003426358.1
UAB_RS0209585	3400.68	0.370326	0.118066	3.13661	0.00170913	0.00421284	flavodoxin family protein	WP_004454488.1
UAB_RS0215845	106.462	0.859792	0.274332	3.13412	0.00172368	0.00424588	Nif11-like leader peptide family natural product precursor	WP_003439731.1
UAB_RS0204560	1397.07	0.387741	0.123781	3.13247	0.00173342	0.00426704	0	WP_009902098.1
UAB_RS0214585	7355.01	-0.287655	0.0918545	-3.13164	0.00173834	0.00427634	UDP-N-acetylmuramoyl-L-alanine--D-glutamate ligase	WP_004454967.1
UAB_RS0214975	2600.46	-0.305787	0.0976525	-3.13138	0.00173988	0.00427729	SoxR reducing system RseC family protein	WP_004454154.1
UAB_RS0211475	641.441	-0.463288	0.148105	-3.12811	0.00175932	0.00432223	hypothetical protein	WP_009897212.1
UAB_RS0210210	4959.32	0.28048	0.0897511	3.12508	0.00177754	0.00436413	L-threonine 3-dehydrogenase	WP_009902770.1
UAB_RS0215640	213.157	-0.642555	0.205729	-3.12331	0.00178827	0.00438756	amidohydrolase family protein	WP_009898031.1
UAB_RS0210440	1131.92	-0.391174	0.12528	-3.1224	0.0017938	0.00439825	3-phosphoshikimate 1-carboxyvinyltransferase	WP_009902796.1
UAB_RS0205210	2423.97	-0.368006	0.118307	-3.11059	0.00186713	0.00457502	0	WP_009902181.1
UAB_RS0201235	9385.65	-0.477065	0.153466	-3.10859	0.00187981	0.00460305	0	WP_009895197.1
UAB_RS0214265	399.249	-0.508363	0.163898	-3.1017	0.00192413	0.00470848	ABC-F type ribosomal protection protein	WP_009903271.1
UAB_RS0201580	2484.48	-0.370754	0.119543	-3.10144	0.00192581	0.0047095	0	WP_009901604.1
UAB_RS0214595	4507.69	-0.311623	0.100677	-3.09528	0.00196629	0.00480533	UDP-N-acetylmuramoyl-tripeptide--D-alanyl-D-alanine ligase	WP_009897829.1
UAB_RS0218690	6300.94	-0.379365	0.122686	-3.09216	0.00198707	0.00485293	dCMP deaminase	WP_003421374.1
UAB_RS0202570	343.35	-0.446846	0.144547	-3.09135	0.00199251	0.00485984	0	WP_009901758.1
UAB_RS0213200	108.239	-0.83212	0.269166	-3.09148	0.00199162	0.00485984	DUF2975 domain-containing protein	WP_009903181.1
UAB_RS0212060	5702.91	0.386761	0.125458	3.08279	0.00205073	0.0049953	amidohydrolase	WP_003433937.1
UAB_RS0210370	1514.06	-0.365846	0.118668	-3.08294	0.00204967	0.0049953	adenine deaminase	WP_003439445.1
UAB_RS0207815	1044.99	0.443809	0.143975	3.08255	0.00205234	0.00499595	0	WP_009896283.1
UAB_RS0207060	287.903	0.478415	0.155365	3.07929	0.00207495	0.00504768	0	WP_009902374.1
UAB_RS0218615	812.73	0.380531	0.123597	3.0788	0.00207834	0.00505263	ribbon-helix-helix protein, CopG family	WP_003421359.1
UAB_RS0212400	73.9063	1.00343	0.326235	3.07579	0.00209943	0.00510058	YhcH/YjgK/YiaL family protein	WP_009903102.1
UAB_RS0208425	3840.45	-0.375546	0.122136	-3.07481	0.00210635	0.00511406	0	WP_003419972.1
UAB_RS0200070	37.0652	1.42724	0.464228	3.07444	0.00210899	0.00511713	DUF2313 domain-containing protein	WP_009901333.1
UAB_RS0211545	115.902	0.837138	0.272866	3.06795	0.00215534	0.00522616	amidohydrolase family protein	WP_009897229.1
UAB_RS02000000220380	652.409	0.44789	0.146126	3.06509	0.00217605	0.00527296	0	WP_003429374.1
UAB_RS0218010	3324.21	-0.288659	0.0942681	-3.0621	0.00219787	0.00532237	YihA family ribosome biogenesis GTP-binding protein	WP_009891775.1
UAB_RS0217475	39.8257	-1.33951	0.437732	-3.06012	0.00221245	0.00535419	small, acid-soluble spore protein, alpha/beta type	WP_009891674.1
UAB_RS0203275	40.8569	1.21977	0.39916	3.05584	0.0022443	0.00542773	0	WP_009901869.1
UAB_RS0210825	11567.8	-0.45151	0.147849	-3.05386	0.00225919	0.00546021	hypothetical protein	WP_003424083.1
UAB_RS0207850	2913.54	0.931102	0.304924	3.05356	0.00226145	0.00546212	0	WP_009896290.1
UAB_RS0211565	79.9472	0.89655	0.293684	3.05278	0.00226735	0.00547281	amidohydrolase	WP_009902990.1
UAB_RS0215050	1447.17	0.408411	0.133839	3.0515	0.00227702	0.0054926	D-tyrosyl-tRNA(Tyr) deacylase	WP_003426448.1
UAB_RS0207900	3130.54	-0.334861	0.109794	-3.0499	0.00228918	0.00551835	0	WP_009889182.1
UAB_RS0203030	3135.88	-0.453701	0.1488	-3.04907	0.00229548	0.00552995	0	WP_009888208.1
UAB_RS0219290	715.723	0.376635	0.123668	3.04553	0.00232272	0.00559196	orotidine-5'-phosphate decarboxylase	WP_003429162.1
UAB_RS0207460	7744.93	-0.266834	0.0876239	-3.04522	0.00232511	0.0055941	0	WP_003428232.1
UAB_RS0208385	703.421	-0.35195	0.115617	-3.04411	0.0023337	0.00561114	0	WP_009896423.1
UAB_RS0209400	32.3587	-1.28184	0.421328	-3.04238	0.00234718	0.0056399	iron chelate uptake ABC transporter family permease subunit	WP_009902683.1
UAB_RS0204410	839.058	-0.343644	0.112991	-3.04133	0.00235535	0.00565587	0	WP_004454330.1
UAB_RS0204310	692.754	0.34363	0.113004	3.04085	0.00235908	0.00566118	0	WP_009902055.1
UAB_RS0211825	1200.91	-0.323318	0.106367	-3.03966	0.00236847	0.00568005	flavodoxin-dependent (E)-4-hydroxy-3-methylbut-2-enyl-diphosphate synthase	WP_003424490.1
UAB_RS0203775	3077.95	0.428007	0.141137	3.03256	0.00242486	0.00581154	0	WP_025992017.1
UAB_RS0218035	12791.9	0.360309	0.118947	3.02916	0.00245236	0.00587368	ATP-dependent Clp endopeptidase proteolytic subunit ClpP	WP_003417102.1
UAB_RS0213190	32812.2	-0.378152	0.124847	-3.02891	0.00245434	0.00587464	protease	WP_032512382.1
UAB_RS0203490	4538.46	0.317296	0.104815	3.02719	0.00246838	0.00590445	0	WP_009901931.1
UAB_RS0218470	4946.52	0.314342	0.103971	3.02336	0.00249981	0.00597579	cobyric acid synthase	WP_021364007.1
UAB_RS0203210	1038.93	-0.345247	0.11449	-3.01551	0.00256544	0.00612872	0	WP_009901835.1
UAB_RS0207670	104771	-0.365327	0.121286	-3.01212	0.00259434	0.0061938	0	WP_003419624.1
UAB_RS0215965	96.1629	-0.783827	0.260463	-3.00936	0.00261799	0.00624625	undecaprenyl-diphosphate phosphatase	WP_003439797.1
UAB_RS0217660	4742.23	-0.294058	0.0977447	-3.00843	0.00262604	0.00626145	S8 family serine peptidase	WP_004454013.1
UAB_RS0216090	302.191	-0.497258	0.165439	-3.00568	0.00264985	0.00631417	helix-turn-helix transcriptional regulator	WP_003431984.1
UAB_RS0211605	82.8976	0.829461	0.27619	3.00322	0.0026714	0.00636144	purine/pyrimidine permease	WP_003434075.1
UAB_RS0213310	195.464	0.580947	0.193702	2.99918	0.00270712	0.00644238	hypothetical protein	WP_004454709.1
UAB_RS0204290	161.678	-0.577433	0.19293	-2.99297	0.00276278	0.00657064	0	WP_003440130.1
UAB_RS0214165	5637.36	-0.29879	0.0998741	-2.99167	0.00277459	0.00659453	thiamine diphosphokinase	WP_004454892.1
UAB_RS0219450	192.977	-0.546639	0.182976	-2.98749	0.00281278	0.00668103	ABC transporter ATP-binding protein	WP_003435768.1
UAB_RS0215650	57.0932	-1.22111	0.40892	-2.98617	0.00282492	0.00670559	DUF5058 family protein	WP_003426729.1
UAB_RS0204890	2432.81	-0.282639	0.0948116	-2.98106	0.00287253	0.00681425	0	WP_003436959.1
UAB_RS2000000221880	2997.35	0.347115	0.116491	2.97976	0.00288472	0.0068388	0	WP_009901994.1
UAB_RS0205150	35.9032	1.30199	0.437574	2.97547	0.0029254	0.00693084	0	WP_003437552.1
UAB_RS0201960	973.356	0.321132	0.107997	2.97352	0.00294408	0.00697066	0	WP_009901682.1
UAB_RS0213035	4062.6	0.291316	0.0980136	2.9722	0.00295674	0.00699619	hypothetical protein	WP_009903159.1
UAB_RS0202060	2709.93	-0.349432	0.117665	-2.96971	0.0029808	0.00704863	0	WP_003420885.1
UAB_RS0210785	14081.6	0.317263	0.106918	2.96736	0.00300367	0.0070982	acetyl-CoA carboxylase carboxyltransferase subunit alpha	WP_009889903.1
UAB_RS0203515	5611.12	-0.334001	0.112668	-2.96446	0.00303215	0.00716096	0	WP_009901938.1
UAB_RS0213755	104.137	-0.855313	0.288883	-2.96076	0.00306878	0.00724286	DUF2325 domain-containing protein	WP_009890712.1
UAB_RS0218435	1067.76	0.405449	0.137045	2.9585	0.00309142	0.00729169	cobalt-precorrin-7 (C(5))-methyltransferase	WP_009903759.1
UAB_RS0214905	11339.1	0.283946	0.0960366	2.95665	0.00311004	0.00733095	hypothetical protein	WP_009897893.1
UAB_RS0213445	1534.15	0.334838	0.113445	2.95153	0.00316201	0.00744874	cytidine deaminase	WP_009890647.1
UAB_RS0207505	2895.65	0.297307	0.100746	2.95105	0.00316693	0.0074556	0	WP_003428224.1
UAB_RS0214365	64457.4	-0.300229	0.101827	-2.94841	0.0031941	0.00751481	aminopeptidase P family protein	WP_009903275.1
UAB_RS0207495	216.891	0.59967	0.203531	2.94633	0.00321567	0.0075608	0	WP_003419503.1
UAB_RS0211470	1876.7	-0.2865	0.0972791	-2.94514	0.0032281	0.00758522	hypothetical protein	WP_003424324.1
UAB_RS0215620	1270.58	-0.287713	0.0977197	-2.94426	0.00323724	0.00760189	Gfo/Idh/MocA family oxidoreductase	WP_003439589.1
UAB_RS0209200	239.744	0.492917	0.16767	2.93981	0.00328413	0.00770713	ABC transporter permease	WP_009889499.1
UAB_RS0213065	40269	0.233955	0.0796527	2.93719	0.003312	0.0077647	ABC transporter substrate-binding protein	WP_004454662.1
UAB_RS0204700	134.978	-0.628135	0.213861	-2.93711	0.00331283	0.0077647	0	WP_003436903.1
UAB_RS02000000220630	2426.14	-0.362895	0.123631	-2.9353	0.00333225	0.00780041	hypothetical protein	WP_003424195.1
UAB_RS0207315	894.962	-0.386335	0.131611	-2.93544	0.00333075	0.00780041	0	WP_003428279.1
UAB_RS0207835	2015.01	0.875603	0.298609	2.93227	0.0033649	0.00787188	0	WP_009902455.1
UAB_RS0217440	3875.26	-0.354868	0.121045	-2.93171	0.00337104	0.00788129	ABC transporter permease subunit	WP_009903651.1
UAB_RS0202840	232.745	-0.704269	0.240725	-2.92562	0.00343769	0.00803207	0	WP_009895380.1
UAB_RS0205170	91.8007	0.719153	0.245851	2.92516	0.00344284	0.00803905	0	WP_025992021.1
UAB_RS0209430	939.782	-0.374183	0.128026	-2.92271	0.00346998	0.00809735	lipoprotein	WP_009902687.1
UAB_RS0211660	1549.31	-0.365058	0.125219	-2.91534	0.00355299	0.00828585	FAD binding domain-containing protein	WP_009903004.1
UAB_RS0214835	301.425	-0.499844	0.171473	-2.91501	0.00355677	0.00828949	pentapeptide repeat-containing protein	WP_009897880.1
UAB_RS0207680	33450.1	-0.336286	0.115387	-2.91441	0.00356358	0.00830015	0	WP_009889131.1
UAB_RS0219490	206.011	0.477887	0.164171	2.91092	0.00360371	0.00838838	transcription antiterminator	WP_021372834.1
UAB_RS0207845	1628.1	1.0336	0.355216	2.90978	0.00361687	0.00841375	0	WP_009889166.1
UAB_RS0206595	1474.51	0.388574	0.133578	2.90896	0.00362633	0.0084265	0	WP_003428430.1
UAB_RS0209495	253.228	0.593975	0.204191	2.90891	0.00362688	0.0084265	glycerophosphodiester phosphodiesterase	WP_009902694.1
UAB_RS0201290	3225.12	-0.252844	0.0869311	-2.90855	0.00363104	0.00843091	0	WP_003435654.1
UAB_RS0212750	3043.71	-0.331376	0.114001	-2.90678	0.00365166	0.00847349	prepilin-type N-terminal cleavage/methylation domain-containing protein	WP_009897487.1
UAB_RS0207345	76.5094	0.877535	0.301917	2.90655	0.00365443	0.00847462	0	WP_003428267.1
UAB_RS0211790	4188.75	0.243523	0.083834	2.90483	0.00367457	0.00851604	sel1 repeat family protein	WP_003434025.1
UAB_RS0205585	35952.9	0.286425	0.098762	2.90015	0.00372979	0.00863862	0	WP_009888725.1
UAB_RS0215485	2512.87	0.345888	0.119275	2.89991	0.00373267	0.00863993	EamA family transporter	WP_009897998.1
UAB_RS0218060	3648.3	-0.384427	0.132808	-2.89461	0.0037963	0.00878174	phosphoglycerate dehydrogenase	WP_009891785.1
UAB_RS0200645	9269.85	-0.301009	0.104009	-2.89407	0.00380284	0.0087914	hypothetical protein	WP_009894741.1
UAB_RS0213960	405.353	0.423499	0.146537	2.89004	0.00385191	0.00889931	HAMP domain-containing histidine kinase	WP_009903237.1
UAB_RS0204635	3278.87	0.372764	0.12907	2.88808	0.00387607	0.00894959	0	WP_009902105.1
UAB_RS0214055	147.522	0.578939	0.200576	2.88638	0.00389703	0.0089924	transcription antiterminator	WP_009903255.1
UAB_RS0208060	1222.31	-0.386805	0.13403	-2.88595	0.00390235	0.0089991	0	WP_009889225.1
UAB_RS0215670	59.19	0.939364	0.32558	2.8852	0.00391161	0.00901487	manganese catalase family protein	WP_003439611.1
UAB_RS0207305	937.159	0.441953	0.153282	2.88327	0.0039357	0.00906478	0	WP_003419418.1
UAB_RS0206240	1542.58	-0.317101	0.110008	-2.88252	0.00394512	0.00908084	0	WP_003428523.1
UAB_RS0211575	146.404	0.61072	0.211989	2.8809	0.0039654	0.0091219	YgeY family selenium metabolism-linked hydrolase	WP_009893427.1
UAB_RS0213100	1076.83	0.375743	0.130706	2.87472	0.00404386	0.00929664	quinolinate synthase NadA	WP_004454668.1
UAB_RS0201745	58.7958	-0.971202	0.338082	-2.87268	0.00407007	0.0093511	0	WP_009901636.1
UAB_RS02000000221010	72.3202	-0.832508	0.290132	-2.86941	0.00411236	0.00944244	hypothetical protein	WP_009903681.1
UAB_RS0217355	9.05456	-2.37461	0.828232	-2.86709	0.00414269	0.00950623	ABC transporter ATP-binding protein	WP_009903640.1
UAB_RS0206570	1284.55	0.28976	0.101072	2.86686	0.0041456	0.00950704	0	WP_009902296.1
UAB_RS0214420	2366.65	0.285871	0.0997966	2.86454	0.00417619	0.00956541	hypothetical protein	WP_009903276.1
UAB_RS0200260	66.8295	0.949877	0.331581	2.86469	0.00417417	0.00956541	hypothetical protein	WP_009901430.1
UAB_RS0202675	163.456	-0.592778	0.207123	-2.86196	0.00421026	0.00963751	0	WP_003425177.1
UAB_RS02000000220555	60.9842	1.02644	0.358784	2.86089	0.00422449	0.00966414	acetaldehyde dehydrogenase (acetylating)	WP_009902841.1
UAB_RS0201230	46293.9	-0.351317	0.122913	-2.85826	0.00425974	0.00973879	0	WP_003421130.1
UAB_RS0209085	944.126	0.37068	0.129774	2.85635	0.00428542	0.00979149	0	WP_009902635.1
UAB_RS0218275	14828.5	0.268761	0.0942767	2.85077	0.00436134	0.00995884	DNA polymerase III subunit alpha	WP_003436251.1
UAB_RS0210450	797.495	-0.449837	0.158045	-2.84626	0.00442354	0.0100947	prephenate dehydratase	WP_009902801.1
UAB_RS0219645	4345.66	0.298775	0.105116	2.84233	0.00447844	0.0102137	50S ribosomal protein L9	WP_003429267.1
UAB_RS0202820	1101.57	-0.359758	0.126666	-2.84021	0.00450837	0.0102757	0	WP_003425143.1
UAB_RS0204040	333.541	0.520355	0.183262	2.8394	0.00451987	0.0102956	0	WP_009902014.1
UAB_RS0201595	586.532	0.39632	0.1397	2.83693	0.00455498	0.0103692	0	WP_003434422.1
UAB_RS0201225	46904.8	-0.355729	0.125456	-2.83549	0.00457552	0.0104096	0	WP_009901573.1
UAB_RS0208745	1308.61	0.395501	0.139521	2.8347	0.00458684	0.010429	0	WP_003436661.1
UAB_RS0207645	85.2058	0.861119	0.303801	2.83448	0.00459	0.0104298	0	WP_009896246.1
UAB_RS0209060	414.015	-0.470102	0.165957	-2.83268	0.00461601	0.0104825	0	WP_003436555.1
UAB_RS0204090	765.392	-0.383552	0.135649	-2.82753	0.00469093	0.0106461	0	WP_009902015.1
UAB_RS0203160	3700.56	0.362682	0.128295	2.82694	0.00469955	0.0106592	0	WP_009901817.1
UAB_RS0215015	4708.05	-0.30423	0.107642	-2.82632	0.00470863	0.0106733	LysR family transcriptional regulator	WP_004454143.1
UAB_RS0211180	1297.44	-0.363518	0.12904	-2.8171	0.00484592	0.0109711	MarR family transcriptional regulator	WP_009902929.1
UAB_RS0203990	948.094	-0.473503	0.168077	-2.81718	0.00484467	0.0109711	0	WP_009902008.1
UAB_RS0202105	1107.02	-0.337309	0.120014	-2.81058	0.00494525	0.0111892	0	WP_009901695.1
UAB_RS0211205	351.7	0.441795	0.157339	2.80792	0.0049863	0.0112752	dihydroxy-acid dehydratase	WP_009902938.1
UAB_RS0215775	338.201	-0.423145	0.150879	-2.80452	0.00503916	0.0113878	MATE family efflux transporter	WP_009903354.1
UAB_RS0205360	37.9879	-0.985651	0.351551	-2.80372	0.00505173	0.0114093	0	WP_004454219.1
UAB_RS0215060	5376.2	-0.276517	0.0986561	-2.80284	0.00506551	0.0114335	adenine phosphoribosyltransferase	WP_003426450.1
UAB_RS0216025	4385.51	-0.270955	0.0966977	-2.80208	0.0050774	0.0114534	iron ABC transporter permease	WP_004453864.1
UAB_RS0207465	9150.66	-0.306197	0.109293	-2.80162	0.00508466	0.0114628	0	WP_003438310.1
UAB_RS0218695	339.193	-0.439106	0.157177	-2.79371	0.0052108	0.0117401	EF2563 family selenium-dependent molybdenum hydroxylase system protein	WP_003437839.1
UAB_RS0218610	1403.77	0.37726	0.135296	2.7884	0.00529696	0.011927	type II toxin-antitoxin system PemK/MazF family toxin	WP_003421356.1
UAB_RS0215575	447.967	0.443171	0.158947	2.78817	0.00530066	0.0119281	YhbD family protein	WP_009891147.1
UAB_RS0219005	5010.14	-0.234102	0.0839939	-2.78713	0.00531766	0.011952	TatD family hydrolase	WP_009898746.1
UAB_RS0203155	2682.35	-0.257601	0.0924253	-2.78713	0.00531769	0.011952	0	WP_032512347.1
UAB_RS0219705	12361.2	-0.264574	0.0949557	-2.78629	0.00533148	0.0119757	GerMN domain-containing protein	WP_009903853.1
UAB_RS0202420	639.199	0.493907	0.177508	2.78245	0.0053951	0.0121113	0	WP_003436043.1
UAB_RS0205850	70.2247	-0.742546	0.267081	-2.78022	0.00543215	0.0121871	0	WP_003437021.1
UAB_RS0219360	2343.27	-0.419424	0.150967	-2.77826	0.00546517	0.0122538	HAD family hydrolase	WP_003435799.1
UAB_RS0216160	332.486	-0.423483	0.152458	-2.7777	0.00547454	0.0122619	DUF2087 domain-containing protein	WP_009891335.1
UAB_RS0204370	226.975	-0.529326	0.190566	-2.77765	0.00547534	0.0122619	0	WP_009902064.1
UAB_RS0204535	29902.9	-0.229871	0.0827651	-2.77739	0.00547978	0.0122644	0	WP_011860916.1
UAB_RS0203215	170.808	-0.490811	0.176875	-2.7749	0.00552183	0.0123511	0	WP_009901837.1
UAB_RS0201375	16951.7	0.299139	0.107872	2.77308	0.00555285	0.012411	0	WP_009901581.1
UAB_RS0204165	581.243	-0.44898	0.161915	-2.77294	0.00555528	0.012411	0	WP_009895633.1
UAB_RS0203830	36.7867	-1.07782	0.388849	-2.77181	0.00557452	0.0124465	0	WP_009895577.1
UAB_RS0214435	1237.79	0.476496	0.172198	2.76714	0.00565513	0.0126189	ACT domain-containing protein	WP_003416152.1
UAB_RS0207270	738.519	0.331621	0.119853	2.76689	0.00565934	0.0126208	0	WP_009889058.1
UAB_RS0203480	4125.38	0.312426	0.113102	2.76235	0.00573869	0.0127901	0	WP_009901927.1
UAB_RS0206185	3041.7	0.321212	0.116577	2.75538	0.00586248	0.0130503	0	WP_003438015.1
UAB_RS0209735	52.4159	0.919414	0.333666	2.75549	0.00586038	0.0130503	thiamine biosynthesis protein ThiF	WP_012816169.1
UAB_RS0204265	245.35	-0.497253	0.18057	-2.7538	0.00589075	0.0131054	0	WP_009902048.1
UAB_RS0214505	2641.9	0.321262	0.116686	2.75321	0.00590136	0.0131179	HAMP domain-containing sensor histidine kinase	WP_009890859.1
UAB_RS0218825	52.3664	-1.13521	0.412339	-2.7531	0.00590339	0.0131179	prepilin peptidase	WP_009903799.1
UAB_RS0214385	65.7254	-0.741128	0.269229	-2.75278	0.0059092	0.0131229	YitT family protein	WP_003426922.1
UAB_RS0204690	3033.1	-0.266417	0.0968218	-2.75162	0.0059302	0.0131617	0	WP_009902113.1
UAB_RS0200005	94.3128	0.663816	0.241366	2.75024	0.0059551	0.0132091	N-acetylmuramoyl-L-alanine amidase	WP_009901326.1
UAB_RS0206165	1741.92	0.291371	0.105994	2.74894	0.00597888	0.013254	0	WP_009902263.1
UAB_RS0208405	169.702	0.492584	0.179822	2.73928	0.0061574	0.0136335	0	WP_003427435.1
UAB_RS0219075	62.6202	0.818389	0.298756	2.73932	0.00615657	0.0136335	hypothetical protein	WP_009898755.1
UAB_RS02000000220110	3466.99	0.336331	0.122806	2.73873	0.00616778	0.0136483	0	WP_125026147.1
UAB_RS2000000221180	22.4527	1.45066	0.530119	2.73648	0.00620998	0.0137335	C40 family peptidase	WP_009901341.1
UAB_RS0203600	6210.42	0.242726	0.088755	2.73479	0.00624209	0.0137882	0	WP_009901961.1
UAB_RS0208905	52.2308	0.940204	0.34379	2.73482	0.00624136	0.0137882	0	WP_003433522.1
UAB_RS0218735	3093.78	-0.284255	0.10401	-2.73295	0.00627692	0.0138569	DUF1385 domain-containing protein	WP_003421392.1
UAB_RS0218070	109.732	0.691728	0.253666	2.72692	0.00639277	0.0141043	conjugated bile salt MFS transporter	WP_009898487.1
UAB_RS0209380	1221.51	0.32419	0.119037	2.72345	0.00646048	0.0142452	0	WP_009902681.1
UAB_RS0213060	315.544	0.459924	0.168891	2.7232	0.0064652	0.0142472	hypothetical protein	WP_004454661.1
UAB_RS0204425	15.5856	-1.7381	0.638415	-2.72252	0.00647858	0.0142682	0	WP_003439186.1
UAB_RS0202760	4225.93	0.251812	0.0925371	2.7212	0.00650448	0.0143168	0	WP_003435926.1
UAB_RS0215410	1278.29	0.345751	0.127275	2.71656	0.00659648	0.0145107	hypothetical protein	WP_004454071.1
UAB_RS0208390	424.84	-0.414381	0.152589	-2.71567	0.00661417	0.014541	0	WP_003434110.1
UAB_RS0214280	4112.96	-0.278705	0.102734	-2.71289	0.0066699	0.0146549	RluA family pseudouridine synthase	WP_004454913.1
UAB_RS0219355	4233.8	-0.382902	0.141361	-2.70867	0.0067553	0.0148338	SDR family oxidoreductase	WP_003429183.1
UAB_RS0210980	4851.89	-0.246225	0.0911263	-2.70202	0.00689193	0.0151249	RNA chaperone Hfq	WP_003428780.1
UAB_RS0207435	614.928	0.416765	0.1543	2.701	0.00691306	0.0151623	0	WP_003419469.1
UAB_RS0200290	2718.52	-0.312634	0.115913	-2.69715	0.00699364	0.01533	protease	WP_032512328.1
UAB_RS0209310	1361.56	-0.297359	0.110304	-2.69582	0.00702165	0.0153823	0	WP_009902671.1
UAB_RS0214065	3940.67	-0.247062	0.0917058	-2.69407	0.00705845	0.0154538	hypothetical protein	WP_004454870.1
UAB_RS0209915	736.103	0.339948	0.12622	2.69329	0.0070751	0.0154812	transporter substrate-binding domain-containing protein	WP_004454411.1
UAB_RS0217495	16830.8	-0.246974	0.0917105	-2.69297	0.0070818	0.0154868	aspartate-semialdehyde dehydrogenase	WP_003422061.1
UAB_RS2000000221610	74.1069	0.72287	0.269271	2.68455	0.00726284	0.015866	anaerobic sulfite reductase subunit AsrA	WP_009903096.1
UAB_RS0219625	16.6953	-1.84636	0.687784	-2.6845	0.00726377	0.015866	0	0
UAB_RS0206010	5721.32	-0.334492	0.12476	-2.68108	0.00733843	0.0160197	0	WP_003437963.1
UAB_RS0211890	645.842	0.509457	0.190217	2.67829	0.00739983	0.0161443	D-alanyl-D-alanine carboxypeptidase	WP_009903037.1
UAB_RS0210540	132.546	0.599749	0.224143	2.67574	0.00745639	0.0162582	ABC transporter ATP-binding protein	WP_003435491.1
UAB_RS0217280	767.128	0.379969	0.142017	2.67551	0.00746159	0.01626	aldo/keto reductase	WP_009903616.1
UAB_RS0218810	6884.27	-0.24883	0.0931154	-2.67227	0.0075339	0.016408	peptidylprolyl isomerase	WP_009892066.1
UAB_RS0213950	834.792	0.379583	0.142217	2.66903	0.00760699	0.0165574	FtsX-like permease family protein	WP_032512444.1
UAB_RS0210685	19.9522	1.45984	0.547513	2.66631	0.00766885	0.0166823	ethanolamine/propanediol utilization cobalamin adenosyltransferase	WP_009902843.1
UAB_RS0200270	396395	-1.80767	0.678488	-2.66425	0.00771591	0.0167749	0	0
UAB_RS0214530	383.952	0.363256	0.13654	2.66044	0.00780392	0.0169563	RNA polymerase sporulation sigma factor SigG	WP_003416101.1
UAB_RS0209550	5187.4	0.261269	0.0982796	2.65842	0.00785071	0.0170481	0	WP_009902703.1
UAB_RS0218050	9057.13	0.275404	0.103744	2.65465	0.007939	0.0172297	ribonuclease PH	WP_009903712.1
UAB_RS0206730	2168.25	0.328255	0.123779	2.65195	0.0080029	0.0173583	0	WP_003438150.1
UAB_RS0213505	1782.09	0.339242	0.127977	2.65081	0.00802985	0.0174066	16S rRNA (uracil(1498)-N(3))-methyltransferase	WP_003430913.1
UAB_RS0212530	1229.81	0.329193	0.12423	2.64987	0.00805234	0.0174361	hypothetical protein	WP_009903118.1
UAB_RS0210830	492.387	0.411623	0.155339	2.64985	0.00805284	0.0174361	VOC family protein	WP_009902853.1
UAB_RS0204295	8004.99	-0.251516	0.0950409	-2.64639	0.00813551	0.0176049	0	WP_003440146.1
UAB_RS0209145	109.673	-0.771437	0.291719	-2.64446	0.0081822	0.0176956	0	WP_009902640.1
UAB_RS0217255	1461.55	0.265	0.100282	2.64254	0.00822877	0.0177757	sigma 54-interacting transcriptional regulator	WP_009903612.1
UAB_RS0218945	17.347	-1.40443	0.531437	-2.64271	0.00822463	0.0177757	hypothetical protein	WP_009892091.1
UAB_RS0206795	159.537	0.593922	0.224807	2.64192	0.00824367	0.0177975	0	WP_003419254.1
UAB_RS0202205	4.19809	4.05907	1.53948	2.63665	0.00837285	0.0180659	0	WP_009901714.1
UAB_RS0207285	26311.9	0.354985	0.134666	2.63605	0.00838775	0.0180876	0	WP_009896192.1
UAB_RS0219710	3403.12	0.276727	0.105019	2.63502	0.00841318	0.0181319	aminotransferase class V-fold PLP-dependent enzyme	WP_003434244.1
UAB_RS0215885	312.699	-0.447695	0.170311	-2.62869	0.00857142	0.0184623	AMP-binding protein	WP_009898071.1
UAB_RS0219465	108.565	-0.644058	0.245437	-2.62413	0.00868715	0.0187007	ketohydroxyglutarate aldolase	WP_009898812.1
UAB_RS0202525	898.632	0.391386	0.149177	2.62364	0.00869957	0.0187107	0	WP_009901748.1
UAB_RS0213250	40.6355	-1.01286	0.386065	-2.62355	0.00870183	0.0187107	manganese catalase family protein	WP_003416728.1
UAB_RS0215740	4884.35	-0.293691	0.112011	-2.62199	0.00874187	0.0187859	hypothetical protein	WP_003439687.1
UAB_RS0210390	1069.36	-0.30511	0.116562	-2.61758	0.0088557	0.0190196	O-acetylhomoserine aminocarboxypropyltransferase/cysteine synthase	WP_003439438.1
UAB_RS0207390	1548.28	0.291247	0.111293	2.61693	0.00887247	0.0190446	0	WP_009902401.1
UAB_RS0215090	108.089	-0.6186	0.236558	-2.615	0.00892264	0.0191412	accessory gene regulator B family protein	WP_004454130.1
UAB_RS0214210	2215.59	-0.268711	0.102785	-2.61429	0.00894126	0.0191701	DUF116 domain-containing protein	WP_009897782.1
UAB_RS0214205	6224.81	-0.251592	0.0962779	-2.61319	0.00897023	0.0192101	zinc metallopeptidase	WP_003416253.1
UAB_RS0208925	107.358	0.839493	0.32123	2.61337	0.0089655	0.0192101	0	WP_009902600.1
UAB_RS0206610	3.61424	4.26316	1.63539	2.60681	0.00913896	0.0195602	0	WP_003428426.1
UAB_RS0203605	114.401	-0.600713	0.23063	-2.60466	0.00919659	0.0196722	0	WP_003417824.1
UAB_RS0216080	1864.28	-0.311396	0.11967	-2.60212	0.00926504	0.0198073	NAD(P)/FAD-dependent oxidoreductase	WP_009903395.1
UAB_RS0201365	1028.53	-0.940804	0.361873	-2.59982	0.00932729	0.0199289	0	0
UAB_RS0208210	305.529	-0.508764	0.195713	-2.59954	0.00933482	0.0199336	0	WP_009889262.1
UAB_RS0217645	100.752	-0.590362	0.22723	-2.59809	0.00937451	0.0200068	dehydrogenase	WP_003422120.1
UAB_RS0208685	343.783	0.49111	0.189111	2.59693	0.009406	0.0200625	0	WP_009902566.1
UAB_RS0215490	24422.6	-0.281638	0.108536	-2.59488	0.00946231	0.0201711	zinc metalloprotease Zmp1	WP_003436135.1
UAB_RS0218065	1939.27	-0.368931	0.142378	-2.5912	0.00956409	0.0203764	DUF3783 domain-containing protein	WP_009898485.1
UAB_RS0206050	1779.82	-0.292944	0.113118	-2.58971	0.00960564	0.0204532	0	WP_003437972.1
UAB_RS0207000	323.656	-0.540565	0.209048	-2.58584	0.00971421	0.0206726	0	WP_009902362.1
UAB_RS0210220	360.741	-0.53353	0.20643	-2.58456	0.00975031	0.0207375	hypothetical protein	WP_003430297.1
UAB_RS0216055	77.6164	0.77943	0.301684	2.58359	0.00977767	0.0207838	2-keto-3-deoxygluconate permease	WP_003422586.1
UAB_RS0217675	45.4886	-0.873949	0.338854	-2.57913	0.00990494	0.0210424	polysaccharide deacetylase family protein	WP_009898389.1
UAB_RS0205315	1506.39	-0.289093	0.112272	-2.57492	0.0100263	0.0212759	0	WP_004454230.1
UAB_RS0217450	156.222	-0.524106	0.203538	-2.57498	0.0100246	0.0212759	excinuclease ABC subunit UvrA	WP_009903652.1
UAB_RS0215745	1581.53	0.315035	0.122363	2.57459	0.0100359	0.0212841	PTS lactose/cellobiose transporter subunit IIA	WP_003422696.1
UAB_RS0216650	84.4601	0.690536	0.268255	2.57418	0.0100479	0.0212975	DUF3139 domain-containing protein	WP_003440031.1
UAB_RS0201030	3652.14	0.309303	0.120426	2.56841	0.0102167	0.0216386	0	WP_009887855.1
UAB_RS0210275	397.143	0.39978	0.155661	2.56828	0.0102205	0.0216386	MBL fold metallo-hydrolase	WP_009889757.1
UAB_RS0212125	9.25199	-2.02277	0.787685	-2.56799	0.0102291	0.0216445	hypothetical protein	WP_009903073.1
UAB_RS0202715	9.00782	1.99746	0.778337	2.56631	0.0102786	0.0217369	0	WP_003425168.1
UAB_RS0215140	355.311	-0.386289	0.150643	-2.56428	0.0103391	0.0218525	di-trans,poly-cis-decaprenylcistransferase	WP_003422884.1
UAB_RS0208590	2072.9	-0.315775	0.123214	-2.56282	0.0103827	0.0219322	0	WP_009902551.1
UAB_RS0215180	6187.57	-0.245382	0.0957659	-2.56231	0.0103977	0.0219389	glycosyltransferase	WP_003431768.1
UAB_RS0204905	891.239	-0.311603	0.121602	-2.56248	0.0103927	0.0219389	0	WP_009888558.1
UAB_RS0211400	845.755	-0.328221	0.128181	-2.5606	0.0104492	0.0220351	methyltransferase domain-containing protein	WP_003424276.1
UAB_RS0208435	2352.55	-0.257347	0.100514	-2.56032	0.0104577	0.0220406	0	WP_003439345.1
UAB_RS0214955	4337.77	-0.211732	0.0827395	-2.55902	0.0104968	0.0221105	UDP-N-acetylglucosamine--N-acetylmuramyl-(pentapeptide) pyrophosphoryl-UDP N-acetylglucosamine transferase	WP_004454156.1
UAB_RS2000000221900	39.7966	0.950849	0.371856	2.55703	0.0105569	0.0222245	0	WP_161805728.1
UAB_RS0205925	3233.43	-0.26111	0.102131	-2.55662	0.0105695	0.0222385	0	WP_009902241.1
UAB_RS2000000221525	100.495	-0.731259	0.286469	-2.55266	0.0106903	0.0224798	dihydrofolate reductase family protein	WP_071605626.1
UAB_RS0207035	58.0244	0.785696	0.308539	2.5465	0.0108808	0.0228676	0	WP_006354939.1
UAB_RS0215355	3907.73	-0.255877	0.100607	-2.54333	0.0109802	0.0230633	tRNA preQ1(34) S-adenosylmethionine ribosyltransferase-isomerase QueA	WP_009897971.1
UAB_RS0218030	50035.9	0.253817	0.0998516	2.54195	0.0110237	0.0231417	ATP-dependent Clp protease ATP-binding subunit ClpX	WP_003417105.1
UAB_RS0202515	2604.1	0.42761	0.16824	2.54167	0.0110324	0.0231469	0	WP_009901746.1
UAB_RS0206410	114.934	-0.643097	0.253044	-2.54145	0.0110395	0.0231487	0	WP_003419063.1
UAB_RS0219340	212.207	-0.449323	0.177019	-2.53828	0.0111399	0.0233461	M15 family metallopeptidase	WP_003435804.1
UAB_RS0205555	6445.82	0.281542	0.110937	2.53785	0.0111536	0.0233617	0	WP_009895920.1
UAB_RS0203360	1625.38	0.305275	0.120383	2.53586	0.0112171	0.0234815	0	WP_009901895.1
UAB_RS0206590	101.336	-0.695728	0.27449	-2.53462	0.011257	0.0235517	0	WP_009902299.1
UAB_RS0207275	375.378	0.426554	0.168601	2.52996	0.0114076	0.0238534	0	WP_003438272.1
UAB_RS0201260	60680.8	-0.330585	0.130683	-2.52967	0.0114171	0.0238598	0	WP_003421121.1
UAB_RS0204060	282.039	0.440226	0.174476	2.52313	0.0116316	0.0242945	0	WP_003438911.1
UAB_RS0214780	4569.87	-0.251812	0.0998347	-2.52229	0.0116593	0.0243386	aminotransferase class I/II-fold pyridoxal phosphate-dependent enzyme	WP_003427095.1
UAB_RS0211235	388.519	-0.389293	0.154397	-2.52138	0.0116895	0.0243881	AraC family transcriptional regulator	WP_009902940.1
UAB_RS0211710	3981.54	-0.312563	0.124027	-2.52013	0.0117311	0.0244611	fructose-6-phosphate aldolase	WP_003430626.1
UAB_RS0205025	2968.56	0.246884	0.0979985	2.51927	0.01176	0.0245076	0	WP_003437479.1
UAB_RS0213820	1514.92	0.263436	0.104579	2.51901	0.0117685	0.0245118	PRD domain-containing protein	WP_003431027.1
UAB_RS0214525	97.8844	0.641874	0.254881	2.51833	0.0117913	0.0245344	YlmC/YmxH family sporulation protein	WP_003416105.1
UAB_RS0204705	59.5012	0.798625	0.31713	2.51829	0.0117926	0.0245344	0	WP_009902116.1
UAB_RS0201040	3896.63	0.401755	0.160035	2.51041	0.0120591	0.0250748	0	WP_009892548.1
UAB_RS0208185	1117.86	0.31329	0.125148	2.50335	0.0123022	0.0255661	0	WP_009889257.1
UAB_RS0202720	18.1802	1.5161	0.605677	2.50315	0.0123094	0.0255668	0	WP_003425166.1
UAB_RS0218215	44.6225	-0.800336	0.319919	-2.50168	0.0123604	0.0256584	ABC-2 family transporter protein	WP_170875599.1
UAB_RS0218360	447.554	-0.326621	0.130683	-2.49935	0.0124422	0.0258138	alkaline phosphatase family protein	WP_009903752.1
UAB_RS0215630	1681.64	-0.296458	0.1187	-2.49754	0.0125058	0.0259313	HAD family phosphatase	WP_009898027.1
UAB_RS0212910	4026.72	-0.229734	0.0920162	-2.49667	0.0125366	0.0259806	toxic anion resistance protein	WP_004454642.1
UAB_RS0200470	24.5249	1.18901	0.476675	2.49439	0.0126173	0.0261334	phage holin family protein	WP_009898413.1
UAB_RS0215755	7147.08	0.22164	0.088866	2.49409	0.0126282	0.0261413	6-phospho-beta-glucosidase	WP_009898062.1
UAB_RS0216475	330.533	-0.442448	0.177538	-2.49213	0.012698	0.0262712	glycerate kinase	WP_009903450.1
UAB_RS0200230	33.5872	1.10129	0.442006	2.49158	0.0127178	0.0262976	C40 family peptidase	WP_009901351.1
UAB_RS0218665	19139.4	0.276191	0.110961	2.48908	0.0128073	0.0264679	F0F1 ATP synthase subunit B	WP_009892033.1
UAB_RS0200335	10.463	1.97378	0.793292	2.48809	0.0128432	0.0265275	hypothetical protein	WP_009901451.1
UAB_RS0215475	524.962	0.299238	0.120332	2.48677	0.0128909	0.0266111	winged helix-turn-helix transcriptional regulator	WP_003436142.1
UAB_RS0215245	9945.93	-0.276476	0.1112	-2.48631	0.0129077	0.0266311	sugar transferase	WP_009891044.1
UAB_RS0203405	30.8208	1.133	0.456	2.48464	0.0129682	0.0267412	0	WP_009901904.1
UAB_RS0206585	7.48793	2.25811	0.909282	2.48339	0.0130137	0.02682	0	WP_003438111.1
UAB_RS0210185	227.569	0.455771	0.183738	2.48055	0.0131181	0.0270202	MerR family transcriptional regulator	WP_009902767.1
UAB_RS0219720	1013.44	0.322255	0.130038	2.47816	0.0132063	0.0271869	ParA family protein	WP_003420496.1
UAB_RS0212250	4986.41	-0.260025	0.104955	-2.47748	0.0132314	0.0272234	ABC transporter ATP-binding protein	WP_003433862.1
UAB_RS0214565	1105.39	0.282709	0.114236	2.47477	0.0133322	0.0274156	DUF881 domain-containing protein	WP_004454964.1
UAB_RS0217265	606.257	-0.417499	0.169068	-2.46941	0.0135336	0.0278145	hypothetical protein	WP_009903614.1
UAB_RS0208120	6216.24	-0.244533	0.0990544	-2.46867	0.0135615	0.0278411	0	WP_021361425.1
UAB_RS0210135	3278.06	-0.389362	0.157709	-2.46886	0.0135545	0.0278411	arsenate reductase family protein	WP_003433620.1
UAB_RS0202085	4960.52	0.274705	0.111311	2.4679	0.0135909	0.027886	0	WP_009888027.1
UAB_RS0200945	620.562	0.376418	0.15264	2.46604	0.0136614	0.0280153	0	WP_009901555.1
UAB_RS0202065	1118.54	0.317462	0.128748	2.46577	0.0136721	0.0280168	0	WP_009895279.1
UAB_RS0211335	14.0551	-1.41839	0.575264	-2.46563	0.0136772	0.0280168	MATE family efflux transporter	WP_009902958.1
UAB_RS0218450	1748.73	0.285196	0.1157	2.46496	0.0137028	0.0280537	serine/threonine protein kinase	WP_009903762.1
UAB_RS0219170	1348.56	-0.326547	0.132508	-2.46435	0.0137263	0.0280864	membrane dipeptidase	WP_003434938.1
UAB_RS0206290	859.028	0.317365	0.128815	2.46373	0.0137499	0.0281194	0	WP_003438043.1
UAB_RS2000000221715	63.6722	0.848002	0.344363	2.46253	0.0137962	0.0281986	0	WP_009902601.1
UAB_RS0215350	1413.67	-0.272576	0.110713	-2.46201	0.0138161	0.0282237	hypothetical protein	WP_003426576.1
UAB_RS0204610	561.305	-0.321895	0.130894	-2.4592	0.0139246	0.0284297	0	WP_009902104.1
UAB_RS0210325	508.079	-0.379646	0.154401	-2.45882	0.0139394	0.0284443	hypothetical protein	WP_003439467.1
UAB_RS0213125	1125.88	-0.264285	0.107512	-2.45819	0.0139637	0.0284706	NUDIX domain-containing protein	WP_009903163.1
UAB_RS0205160	47.8608	1.02552	0.417199	2.4581	0.0139676	0.0284706	0	WP_003437554.1
UAB_RS0203850	1515.64	0.281147	0.114653	2.45216	0.0142002	0.0288846	0	WP_003425127.1
UAB_RS0206695	1354.17	-0.271511	0.110725	-2.45212	0.0142017	0.0288846	0	WP_009902306.1
UAB_RS0210640	1180.6	-0.289561	0.118075	-2.45234	0.0141929	0.0288846	response regulator	WP_003423977.1
UAB_RS0203280	15.6819	1.47433	0.601242	2.45213	0.0142012	0.0288846	0	WP_009901871.1
UAB_RS0218465	4289.14	0.243645	0.0993957	2.45126	0.0142357	0.0289314	cobyrinate a,c-diamide synthase	WP_009898677.1
UAB_RS0200415	96.9434	0.777512	0.317204	2.45114	0.0142403	0.0289314	LysM peptidoglycan-binding domain-containing protein	WP_009901477.1
UAB_RS0213575	4462.94	0.344163	0.140435	2.4507	0.014258	0.0289516	nucleotide exchange factor GrpE	WP_025992033.1
UAB_RS0209835	237.282	-0.458073	0.187126	-2.44794	0.0143674	0.0291578	0	WP_009902731.1
UAB_RS0212065	10924	-0.282285	0.115396	-2.44623	0.0144358	0.0292806	amino acid ABC transporter substrate-binding protein	WP_003433936.1
UAB_RS0215285	49942.8	0.205676	0.0841612	2.44384	0.0145319	0.0294595	cell wall-binding protein Cwp2	WP_009897956.1
UAB_RS0209020	4206.3	0.427896	0.175293	2.44102	0.0146456	0.029674	0	WP_009902622.1
UAB_RS0218310	1372.71	-0.409023	0.1678	-2.43755	0.014787	0.029944	formate/nitrite transporter family protein	WP_003429111.1
UAB_RS0209860	1148.02	-0.368678	0.151411	-2.43495	0.0148937	0.0301438	0	WP_009902733.1
UAB_RS0210350	1885.69	0.281823	0.115872	2.43219	0.0150076	0.0303578	(d)CMP kinase	WP_003439454.1
UAB_RS0210835	491.92	0.386493	0.159098	2.42928	0.0151289	0.0305865	glyoxalase	WP_003435327.1
UAB_RS0206690	6912.6	0.210749	0.0867794	2.42856	0.0151589	0.0306304	0	WP_009902304.1
UAB_RS0208595	310.046	-0.378965	0.156116	-2.42746	0.015205	0.0307069	0	WP_003436727.1
UAB_RS0206655	667.395	0.355996	0.146684	2.42695	0.0152262	0.0307331	0	WP_009902300.1
UAB_RS0201255	43584.3	-0.335399	0.138277	-2.42556	0.015285	0.030835	0	WP_003421122.1
UAB_RS0210645	2563.41	-0.254095	0.104815	-2.42421	0.0153416	0.0309325	histidine kinase N-terminal domain-containing protein	WP_009902832.1
UAB_RS0216305	160.135	-0.683707	0.282056	-2.42402	0.0153499	0.0309326	ABC transporter ATP-binding protein	WP_009903429.1
UAB_RS0213455	909	0.319029	0.13163	2.42368	0.0153642	0.0309445	rRNA maturation RNase YbeY	WP_003430894.1
UAB_RS0205705	5177.17	-0.29667	0.122472	-2.42235	0.0154205	0.0310411	0	WP_003437086.1
UAB_RS0217740	34.3759	1.10347	0.455673	2.42164	0.0154507	0.0310852	helix-turn-helix domain-containing protein	WP_009894692.1
UAB_RS0208750	1396.59	0.29604	0.122395	2.41872	0.0155752	0.0313188	0	WP_009902573.1
UAB_RS0207660	5436.17	0.252171	0.104292	2.41792	0.0156094	0.0313706	0	WP_003428191.1
UAB_RS0217295	495.495	-0.552189	0.228599	-2.41554	0.0157121	0.0315599	ABC transporter permease	WP_009903620.1
UAB_RS0218285	2823.28	0.291645	0.120754	2.4152	0.0157264	0.0315715	NUDIX hydrolase	WP_009893997.1
UAB_RS0219635	322.196	-0.371419	0.153821	-2.41462	0.0157514	0.0316047	hypothetical protein	WP_003429265.1
UAB_RS0216720	428.517	-0.328208	0.136312	-2.40778	0.01605	0.0321866	helix-turn-helix domain-containing protein	WP_003431317.1
UAB_RS0219780	434.473	-0.372135	0.15458	-2.4074	0.0160666	0.0322023	S4 domain-containing protein YaaA	WP_003420479.1
UAB_RS02000000219990	18.256	-1.88333	0.784051	-2.40205	0.0163035	0.0326597	0	WP_009901619.1
UAB_RS0202090	3369.35	0.28891	0.120334	2.4009	0.0163548	0.0327426	0	WP_003420907.1
UAB_RS0205510	38.2196	-1.10892	0.461911	-2.40073	0.0163625	0.0327426	0	WP_009902204.1
UAB_RS0209100	87.5812	0.739259	0.30808	2.39957	0.0164144	0.0328288	0	WP_003436540.1
UAB_RS0208030	1450.15	-0.304956	0.12715	-2.3984	0.016467	0.0329164	0	WP_009902498.1
UAB_RS0217345	54.5461	-0.899698	0.375598	-2.39537	0.0166034	0.0331711	ABC transporter permease	WP_009903637.1
UAB_RS0207955	1160.34	-0.240549	0.100434	-2.39509	0.0166161	0.0331788	0	WP_003438525.1
UAB_RS0218180	2044.11	-0.273416	0.114259	-2.39296	0.016713	0.0333543	helix-turn-helix transcriptional regulator	WP_003436216.1
UAB_RS0219730	1482.3	-0.248609	0.103911	-2.39251	0.0167335	0.0333774	16S rRNA (guanine(527)-N(7))-methyltransferase RsmG	WP_009903855.1
UAB_RS0212645	2265.34	-0.262255	0.109638	-2.39201	0.0167565	0.0334052	sensor histidine kinase	WP_009897457.1
UAB_RS0201820	224.189	-0.511378	0.21405	-2.38906	0.0168916	0.0336566	0	WP_009901656.1
UAB_RS0205815	3783.23	-0.274502	0.115049	-2.38596	0.0170348	0.0339238	0	WP_003437032.1
UAB_RS0215240	5868.29	-0.21231	0.0890729	-2.38355	0.0171466	0.0341281	cell wall-binding protein Cwp7	WP_004454105.1
UAB_RS0214760	1319.55	0.27011	0.113365	2.38266	0.0171883	0.0341928	alpha/beta-type small acid-soluble spore protein	WP_003416009.1
UAB_RS0218365	208.892	0.417746	0.175353	2.38232	0.017204	0.0342058	ABC transporter substrate-binding protein	WP_009898649.1
UAB_RS0208395	870.532	-0.259738	0.109042	-2.382	0.0172187	0.0342168	0	WP_003434107.1
UAB_RS02000000220135	381.588	0.392817	0.165329	2.37597	0.0175029	0.0347445	0	WP_009901877.1
UAB_RS0212795	320.449	-0.357697	0.150544	-2.37603	0.0175001	0.0347445	membrane protein	WP_009897498.1
UAB_RS0202565	922.38	-0.29877	0.125851	-2.37399	0.0175971	0.0349127	0	WP_009901757.1
UAB_RS0207320	1840.45	-0.390047	0.164467	-2.37158	0.0177122	0.0351224	0	WP_009889069.1
UAB_RS0217155	731.46	0.280618	0.118415	2.36978	0.0177988	0.0352753	AEC family transporter	WP_009903595.1
UAB_RS0215610	15766.9	0.292959	0.123639	2.36948	0.0178133	0.0352853	D-alanine--poly(phosphoribitol) ligase	WP_009898020.1
UAB_RS0216585	145.678	0.528838	0.223512	2.36604	0.0179797	0.0355959	iron-containing alcohol dehydrogenase	WP_003440005.1
UAB_RS0202390	969.471	-0.262395	0.111013	-2.36365	0.0180958	0.0358068	0	WP_009895321.1
UAB_RS0205015	35.1159	1.02456	0.433603	2.3629	0.0181327	0.0358607	0	WP_003437476.1
UAB_RS0219055	1876.47	-0.218583	0.0927426	-2.35688	0.0184294	0.0364264	DNA polymerase III subunit delta'	WP_003435878.1
UAB_RS0200295	247.55	-0.498776	0.211642	-2.3567	0.0184383	0.0364264	hypothetical protein	WP_009901440.1
UAB_RS2000000221850	19489.1	-0.370543	0.157464	-2.35319	0.0186132	0.0367525	hypothetical protein	WP_009898399.1
UAB_RS0208295	701.525	0.297524	0.126653	2.34913	0.0188174	0.0371359	0	WP_009902522.1
UAB_RS0203460	7910.5	0.237599	0.101175	2.34838	0.0188551	0.0371907	0	WP_009901919.1
UAB_RS0211535	4936.86	0.298477	0.127131	2.34779	0.0188854	0.0372307	hypothetical protein	WP_032509578.1
UAB_RS0201845	508.75	-0.468461	0.199571	-2.34734	0.0189079	0.0372483	0	WP_009901663.1
UAB_RS0210665	22.9052	1.09494	0.466485	2.34721	0.0189143	0.0372483	ethanolamine utilization microcompartment protein EutL	WP_009902838.1
UAB_RS0219555	31.2848	0.997476	0.425147	2.34619	0.0189663	0.0373309	DUF871 domain-containing protein	WP_003435721.1
UAB_RS0217095	7916.63	-0.241621	0.103126	-2.34297	0.0191309	0.0376349	SsrA-binding protein SmpB	WP_003421925.1
UAB_RS0210205	1358.45	0.328055	0.140031	2.34273	0.0191434	0.0376395	0	WP_003433614.1
UAB_RS0212445	223.393	0.395519	0.168891	2.34186	0.019188	0.0377073	S8 family peptidase	WP_003433821.1
UAB_RS0205030	143.056	0.547057	0.233708	2.34077	0.0192438	0.0377971	0	WP_003437481.1
UAB_RS0213115	220.377	0.46582	0.199141	2.33915	0.0193276	0.0379417	DUF1540 domain-containing protein	WP_003430798.1
UAB_RS0213570	32849.1	0.322292	0.137824	2.33844	0.0193647	0.0379943	molecular chaperone DnaK	WP_003430934.1
UAB_RS0217670	14003.4	-0.225127	0.0963482	-2.3366	0.0194599	0.038141	valine--tRNA ligase	WP_009903676.1
UAB_RS0209230	208.212	0.396467	0.169668	2.33672	0.0194539	0.038141	0	WP_009902657.1
UAB_RS0207485	164.119	0.482839	0.206683	2.33613	0.0194844	0.0381689	0	WP_003438319.1
UAB_RS0208370	19.1168	1.58491	0.67877	2.33498	0.0195446	0.0382666	0	WP_003434118.1
UAB_RS0211315	128.803	-0.527415	0.225983	-2.33387	0.0196025	0.0383599	N-acetyl-gamma-glutamyl-phosphate reductase	WP_009902952.1
UAB_RS0208175	2987.33	0.244793	0.104928	2.33295	0.0196509	0.0383941	0	WP_003429416.1
UAB_RS0209870	301.401	0.502155	0.21524	2.33301	0.0196478	0.0383941	0	WP_003430208.1
UAB_RS0209925	37.805	0.999895	0.428537	2.33328	0.0196336	0.0383941	0	WP_004454406.1
UAB_RS0200400	1061.54	0.281894	0.120851	2.33257	0.0196706	0.0384026	tape measure protein	WP_009901470.1
UAB_RS0203520	987.292	-0.34263	0.14692	-2.33208	0.0196965	0.0384026	0	WP_009901939.1
UAB_RS0214105	215.944	-0.413441	0.177259	-2.33241	0.0196792	0.0384026	hypothetical protein	WP_009893656.1
UAB_RS0216485	73.4036	0.718216	0.307964	2.33214	0.0196933	0.0384026	PTS 2-O-a-mannosyl-D-glycerate transporter subunit IIABC	WP_009903452.1
UAB_RS0217015	920.792	0.320156	0.137431	2.32958	0.0198283	0.0386269	hypothetical protein	WP_009903561.1
UAB_RS0209940	253.715	-0.478885	0.205581	-2.32942	0.0198366	0.0386269	0	WP_004454401.1
UAB_RS0217750	18.9144	1.55513	0.667635	2.32931	0.0198427	0.0386269	YqaJ viral recombinase family protein	WP_102818051.1
UAB_RS0218845	378.345	0.350036	0.150359	2.328	0.0199119	0.0387413	prepilin-type N-terminal cleavage/methylation domain-containing protein	WP_009903805.1
UAB_RS0217410	113.497	-0.596374	0.256459	-2.32542	0.0200497	0.038989	flavodoxin family protein	WP_003438770.1
UAB_RS0210305	619.538	0.31951	0.137433	2.32484	0.0200808	0.039029	0	WP_009902780.1
UAB_RS0211005	4829.04	0.233162	0.100348	2.32352	0.020151	0.0391247	ABC transporter substrate-binding protein	WP_003428792.1
UAB_RS0215565	139.052	-0.440836	0.189716	-2.32366	0.0201435	0.0391247	MarR family transcriptional regulator	WP_003436793.1
UAB_RS0206845	9.70724	1.90126	0.818433	2.32304	0.0201768	0.0391543	0	WP_006354975.1
UAB_RS0206560	4248.07	-0.250757	0.107966	-2.32255	0.0202033	0.0391854	0	WP_003419132.1
UAB_RS0209235	79.8066	0.608429	0.262327	2.31935	0.0203761	0.0394998	0	WP_009896765.1
UAB_RS0212575	2963.13	0.296573	0.12794	2.31806	0.0204463	0.0396154	DNA topoisomerase III	WP_009903124.1
UAB_RS0201220	116333	-0.277873	0.119914	-2.31727	0.0204892	0.0396379	0	WP_003427725.1
UAB_RS0219385	1043.21	-0.416141	0.179584	-2.31725	0.0204899	0.0396379	hypothetical protein	WP_003420681.1
UAB_RS0219440	875.597	-0.27923	0.120485	-2.31755	0.0204737	0.0396379	pentapeptide repeat-containing protein	WP_009898806.1
UAB_RS0200970	3.77811	3.46223	1.49467	2.31639	0.0205369	0.0397082	0	WP_009901560.1
UAB_RS0214485	4046.96	-0.205471	0.0887569	-2.31499	0.0206135	0.0398357	DUF512 domain-containing protein	WP_009903281.1
UAB_RS0217545	2295.02	-0.278196	0.120241	-2.31367	0.0206861	0.0399552	sigma 54-interacting transcriptional regulator	WP_021392135.1
UAB_RS0215265	53722.7	0.209784	0.0906952	2.31306	0.0207192	0.0399984	cell wall-binding cysteine protease Cwp84	WP_009897948.1
UAB_RS0204170	143.654	-0.448519	0.194089	-2.31089	0.0208388	0.0402084	0	WP_009902037.1
UAB_RS0219545	58.8792	0.770516	0.333513	2.3103	0.0208714	0.0402504	DgaE family pyridoxal phosphate-dependent ammonia lyase	WP_009898827.1
UAB_RS0205820	830.932	-0.317694	0.13759	-2.30899	0.0209439	0.0403694	0	WP_003437030.1
UAB_RS0210225	493.618	-0.436746	0.189387	-2.3061	0.0211048	0.0406584	0	WP_003439502.1
UAB_RS0211415	2756.11	-0.296249	0.128517	-2.30513	0.0211591	0.040742	lipoprotein	WP_009897209.1
UAB_RS0207205	5450.89	0.22349	0.0970228	2.30348	0.021252	0.0408996	0	WP_003438242.1
UAB_RS0214170	7723.75	-0.226878	0.0985573	-2.302	0.0213354	0.041039	ribulose-phosphate 3-epimerase	WP_003431138.1
UAB_RS0209780	1067.29	0.25524	0.110939	2.30071	0.0214078	0.0411569	0	WP_009893248.1
UAB_RS0204910	981.977	-0.255473	0.111356	-2.29421	0.0217786	0.0418482	0	WP_003432205.1
UAB_RS0219120	6895.32	-0.205734	0.0897194	-2.29309	0.021843	0.0419287	tRNA lysidine(34) synthetase TilS	WP_003434952.1
UAB_RS02000000220660	281.316	-0.394783	0.172162	-2.29309	0.0218427	0.0419287	hypothetical protein	WP_009889993.1
UAB_RS0201915	837.769	0.317484	0.138779	2.28769	0.0221555	0.0425065	0	WP_009901674.1
UAB_RS02000000220180	291.555	-0.391373	0.171101	-2.28739	0.0221732	0.0425186	0	WP_009895551.1
UAB_RS02000000219840	180601	-1.58169	0.691606	-2.28697	0.0221973	0.0425429	0	0
UAB_RS0213825	1640.73	0.231588	0.101277	2.28667	0.0222151	0.0425551	PTS glucose transporter subunit IIA	WP_009897702.1
UAB_RS0203755	524.307	0.38579	0.168745	2.28623	0.0222407	0.0425823	0	WP_003425085.1
UAB_RS0204055	160.279	0.457707	0.20033	2.28476	0.0223268	0.0427252	0	WP_003438914.1
UAB_RS0212315	972.155	0.307156	0.134522	2.28331	0.0224119	0.0428659	hypothetical protein	WP_009903090.1
UAB_RS0209415	50.1427	-0.773465	0.339183	-2.28038	0.0225851	0.0431751	0	WP_009902686.1
UAB_RS0206650	1743.29	-0.295683	0.129827	-2.27751	0.0227558	0.043479	0	WP_003428415.1
UAB_RS0213325	53.6568	0.784391	0.344609	2.27618	0.0228353	0.0436086	BglG family transcription antiterminator	WP_009903188.1
UAB_RS0213610	88.8436	-0.631792	0.277871	-2.27369	0.0229847	0.0438713	stage II sporulation protein P	WP_009897656.1
UAB_RS0216690	1734.24	-0.236373	0.104279	-2.26674	0.023406	0.0446309	PTS glucose transporter subunit IIA	WP_009903489.1
UAB_RS0210395	695.793	-0.323346	0.142649	-2.26673	0.0234066	0.0446309	0	WP_003439436.1
UAB_RS0207915	557.136	0.30208	0.133342	2.26546	0.0234847	0.0447569	0	WP_009902466.1
UAB_RS0211805	421.851	-0.418425	0.184732	-2.26503	0.0235107	0.0447834	GNAT family N-acetyltransferase	WP_009890262.1
UAB_RS0214075	2042.72	-0.259814	0.114938	-2.26047	0.0237922	0.0452965	16S rRNA (guanine(966)-N(2))-methyltransferase RsmD	WP_003431108.1
UAB_RS0214390	53029.5	0.188018	0.0831842	2.26026	0.0238054	0.0452983	isoleucine--tRNA ligase	WP_004454939.1
UAB_RS0203855	1045.13	0.325392	0.14399	2.25982	0.0238324	0.0453266	0	WP_003425129.1
UAB_RS0218000	36.9173	-1.03528	0.458531	-2.25781	0.0239576	0.0455414	ATP-binding protein	WP_003435617.1
UAB_RS02000000220830	31.8859	0.892946	0.395672	2.25679	0.0240214	0.0456395	hypothetical protein	WP_003416012.1
UAB_RS0205355	8434.12	0.210977	0.0935201	2.25595	0.0240737	0.0457155	0	WP_009902192.1
UAB_RS2000000221530	5178.57	-0.260987	0.115901	-2.2518	0.024335	0.0461881	2-aminoethylphosphonate--pyruvate transaminase	WP_009898016.1
UAB_RS0211600	211.844	0.383099	0.170291	2.24967	0.0244696	0.0464199	amidohydrolase	WP_009897237.1
UAB_RS0212850	66.3098	0.730322	0.325252	2.2454	0.0247424	0.0469097	PTS galactitol transporter subunit IIC	WP_003430710.1
UAB_RS0212200	14.9261	1.53738	0.684729	2.24524	0.024753	0.0469097	histidinol-phosphate transaminase	WP_009897361.1
UAB_RS0212000	2191.07	0.225526	0.100477	2.24456	0.0247964	0.0469442	hypothetical protein	WP_009903058.1
UAB_RS0206220	929.343	0.303876	0.135379	2.24463	0.0247916	0.0469442	0	WP_003438022.1
UAB_RS0202405	85.5581	0.616048	0.275095	2.2394	0.0251297	0.047551	0	WP_009901737.1
UAB_RS0204385	11.4395	1.57208	0.702465	2.23795	0.0252243	0.0477057	0	WP_003434528.1
UAB_RS0201530	43.962	0.991555	0.443176	2.23739	0.0252611	0.047751	0	WP_003425440.1
UAB_RS0208550	28797.3	0.208988	0.0935176	2.23474	0.0254344	0.0480543	0	WP_009896478.1
UAB_RS0213645	13785.9	-0.336062	0.150451	-2.23369	0.0255033	0.0481112	GNAT family N-acetyltransferase	WP_009897664.1
UAB_RS0217145	2660.77	0.224357	0.100436	2.23384	0.0254934	0.0481112	YbhB/YbcL family Raf kinase inhibitor-like protein	WP_003434976.1
UAB_RS0211130	882.252	-0.25438	0.113878	-2.23379	0.0254968	0.0481112	TSUP family transporter	WP_009902913.1
UAB_RS0212385	1614.94	-0.25095	0.112564	-2.2294	0.0257872	0.0486221	MurR/RpiR family transcriptional regulator	WP_003423346.1
UAB_RS0210635	245.495	0.412444	0.185061	2.22869	0.0258347	0.0486869	0	WP_003435437.1
UAB_RS0202885	26.5311	-0.932394	0.418498	-2.22796	0.0258835	0.0487543	0	WP_003434206.1
UAB_RS0203935	258.067	0.403191	0.181435	2.22224	0.0262673	0.0494522	0	WP_003417993.1
UAB_RS0211845	735.96	-0.307194	0.138333	-2.22069	0.0263723	0.0496247	hypothetical protein	WP_022618489.1
UAB_RS0219470	89.5873	-0.604584	0.272574	-2.21805	0.0265513	0.0499362	4-hydroxy-tetrahydrodipicolinate synthase	WP_003435760.1
UAB_RS0201460	1317.82	-0.266351	0.120171	-2.21643	0.0266624	0.0501199	0	WP_003432450.1
UAB_RS0206715	19125.7	-0.218685	0.0987077	-2.21548	0.0267272	0.0501962	0	WP_003424711.1
UAB_RS0205920	2359.23	-0.226243	0.102121	-2.21544	0.0267299	0.0501962	0	WP_009892869.1
UAB_RS0213740	2564.81	0.203743	0.0919755	2.21519	0.026747	0.0502029	selenide, water dikinase SelD	WP_077699367.1
UAB_RS0203415	64.544	0.639834	0.289002	2.21394	0.0268326	0.0503128	0	WP_009901905.1
UAB_RS0216760	56.6815	-0.770888	0.34819	-2.21398	0.0268299	0.0503128	hypothetical protein	WP_009898241.1
UAB_RS0219070	44.6424	-0.744877	0.33648	-2.21373	0.0268471	0.0503146	DUF378 domain-containing protein	WP_003427633.1
UAB_RS0211375	447.191	-0.329388	0.148864	-2.21268	0.0269196	0.0504252	helix-turn-helix transcriptional regulator	WP_009902968.1
UAB_RS0210535	59.6068	0.763441	0.345345	2.21066	0.0270594	0.0506615	0	WP_009902817.1
UAB_RS0212350	3379.27	-0.187295	0.0847759	-2.2093	0.0271539	0.0508128	alpha/beta hydrolase	WP_009890403.1
UAB_RS0203660	7219.6	0.188135	0.0852156	2.20775	0.0272617	0.050989	0	WP_009901974.1
UAB_RS0219090	2092.9	-0.267014	0.120959	-2.20748	0.0272805	0.0509985	tRNA dihydrouridine synthase DusB	WP_003434962.1
UAB_RS0213025	3308.1	0.232353	0.105495	2.20251	0.0276295	0.0516251	sugar-phosphatase	WP_003430759.1
UAB_RS0211765	4615.59	0.239693	0.10902	2.19861	0.0279054	0.0520882	threonine synthase	WP_009903017.1
UAB_RS0207385	372.094	0.303136	0.137871	2.19869	0.0279	0.0520882	0	WP_003419459.1
UAB_RS02000000221020	17.4369	1.29947	0.591391	2.19732	0.0279979	0.0522347	hypothetical protein	WP_009898489.1
UAB_RS02000000221000	32.9601	-0.829088	0.377371	-2.19701	0.0280196	0.0522489	ABC transporter permease	WP_009903638.1
UAB_RS0217435	1761.53	-0.291508	0.132803	-2.19503	0.0281612	0.0524868	ABC transporter ATP-binding protein	WP_009903650.1
UAB_RS0214570	42.0961	0.857592	0.390985	2.19341	0.0282775	0.0526772	FtsQ-type POTRA domain-containing protein	WP_009897828.1
UAB_RS0218975	33.3723	0.949722	0.433607	2.19028	0.0285038	0.0530721	ATP-binding cassette domain-containing protein	WP_009892101.1
[truncated: 1,763 more rows]

## Sheet: TY_TY-rhamnose DEseq
	Gene	baseMean	log2FoldChange	lfcSE	stat	pvalue	padj	Gene Annotation	Protein accession
gene-UAB	UAB_RS0212075	7607.17	-0.636666	0.0971269	-6.555	5.56e-11	1.04e-07	amino acid ABC transporter permease	WP_009897328.1
gene-UAB	UAB_RS0217535	30060.5	0.572646	0.0860627	6.65383	2.86e-11	1.04e-07	serine dehydratase subunit alpha family protein	WP_004454042.1
gene-UAB	UAB_RS0208670	1572.58	-0.884391	0.147134	-6.01078	1.85e-09	2.29e-06	DUF1836 domain-containing protein	WP_016728545.1
gene-UAB	UAB_RS0213015	3000.49	0.671663	0.117467	5.71788	1.08e-08	1e-05	GrdX family protein	WP_009903157.1
gene-UAB	UAB_RS0205575	2558.15	0.615869	0.110128	5.59231	2.24e-08	1.67e-05	agmatinase	WP_009888724.1
gene-UAB	UAB_RS0212080	14368.5	-0.570663	0.103284	-5.52521	3.29e-08	2.04e-05	transporter substrate-binding domain-containing protein	WP_009897329.1
gene-UAB	UAB_RS0205565	867.347	0.812274	0.148975	5.45244	4.97e-08	2.64e-05	adenosylmethionine decarboxylase	WP_003418655.1
gene-UAB	UAB_RS0212065	10924	-0.626182	0.115365	-5.42781	5.7e-08	2.65e-05	amino acid ABC transporter substrate-binding protein	WP_003433936.1
gene-UAB	UAB_RS0209125	4922.34	-0.54687	0.10348	-5.28481	1.26e-07	5.2e-05	YitT family protein	WP_003420189.1
gene-UAB	UAB_RS0208675	2201.48	-0.766876	0.145943	-5.25462	1.48e-07	5.52e-05	hemolysin III family protein	WP_003436685.1
gene-UAB	UAB_RS0212055	4005.31	-0.536453	0.103519	-5.18217	2.19e-07	7.42e-05	amino acid ABC transporter ATP-binding protein	WP_003433939.1
gene-UAB	UAB_RS0200860	2369.76	0.685043	0.134524	5.09234	3.54e-07	0.000109611	elongation factor G	WP_009901543.1
gene-UAB	UAB_RS0212775	9307.45	-0.62628	0.123693	-5.06319	4.12e-07	0.000109611	cold-shock protein	WP_003423148.1
gene-UAB	UAB_RS0216390	9037.86	-0.486296	0.0959206	-5.06978	3.98e-07	0.000109611	ECF transporter S component	WP_009903437.1
gene-UAB	UAB_RS0214545	75372.7	-0.452896	0.0896945	-5.04932	4.43e-07	0.00011002	sugar ABC transporter substrate-binding protein	WP_004454961.1
gene-UAB	UAB_RS0205570	2349.39	0.597546	0.119378	5.00552	5.57e-07	0.000129602	polyamine aminopropyltransferase	WP_009888722.1
gene-UAB	UAB_RS0205560	3820	0.562013	0.113606	4.94704	7.54e-07	0.000164973	aminotransferase class V-fold PLP-dependent enzyme	WP_009895922.1
gene-UAB	UAB_RS0216385	1091.38	-0.528893	0.110748	-4.77567	1.79e-06	0.000370368	DUF523 domain-containing protein	WP_009903436.1
gene-UAB	UAB_RS0211085	2480.12	-0.505854	0.107945	-4.68624	2.78e-06	0.000530174	cold-shock protein	WP_003431034.1
gene-UAB	UAB_RS0212070	8718.09	-0.514636	0.109932	-4.68143	2.85e-06	0.000530174	amino acid ABC transporter permease	WP_003433934.1
gene-UAB	UAB_RS0212975	23783.4	0.617434	0.133472	4.62595	3.73e-06	0.000660888	ketoacyl-ACP synthase III family protein	WP_009897537.1
gene-UAB	UAB_RS0205870	788.414	0.756491	0.165242	4.57808	4.69e-06	0.000793902	ABC transporter permease	WP_003432157.1
gene-UAB	UAB_RS0214035	30336.7	-0.43373	0.0968713	-4.47739	7.56e-06	0.0012228	sugar ABC transporter substrate-binding protein	WP_004454864.1
gene-UAB	UAB_RS0215480	1323.11	0.559851	0.12533	4.46701	7.93e-06	0.00123012	pyridoxal phosphate-dependent aminotransferase	WP_003436139.1
gene-UAB	UAB_RS0209980	31863.8	-0.368678	0.0829055	-4.44697	8.71e-06	0.00129315	2-hydroxyacyl-CoA dehydratase	WP_004454390.1
gene-UAB	RS2000000221340	143.77	-0.983942	0.221653	-4.43911	9.03e-06	0.00129315	#N/A	#N/A
gene-UAB	UAB_RS0214020	18123.8	-0.370647	0.0857824	-4.32078	1.55e-05	0.00214332	DUF4091 domain-containing protein	WP_009903252.1
gene-UAB	UAB_RS0209985	14429.9	-0.41108	0.0956865	-4.29612	1.74e-05	0.00231052	2-hydroxyglutaryl-CoA dehydratase	WP_004454389.1
gene-UAB	UAB_RS0207965	1575.5	-0.546879	0.127545	-4.28772	1.81e-05	0.00231681	D-alanine--D-alanine ligase	WP_009902484.1
gene-UAB	UAB_RS0209675	5092.91	0.528776	0.123594	4.27833	1.88e-05	0.00233622	winged helix-turn-helix transcriptional regulator	WP_003430158.1
gene-UAB	UAB_RS0204985	242.16	-1.05892	0.253226	-4.18174	2.89e-05	0.00336482	sorbitol-6-phosphate dehydrogenase	WP_009895815.1
gene-UAB	UAB_RS0213485	48318.3	-0.414462	0.0989522	-4.18851	2.81e-05	0.00336482	GatB/YqeY domain-containing protein	WP_003430905.1
gene-UAB	UAB_RS0203830	36.7867	-1.5538	0.384938	-4.0365	5.43e-05	0.00611917	hypothetical protein	WP_009895577.1
gene-UAB	UAB_RS0201930	1350.35	0.449095	0.112195	4.00281	6.26e-05	0.00647167	HAMP domain-containing histidine kinase	WP_009901676.1
gene-UAB	UAB_RS0205525	10619.2	0.352841	0.0880612	4.00677	6.16e-05	0.00647167	SPFH/Band 7/PHB domain protein	WP_003437173.1
gene-UAB	UAB_RS0212970	16719	0.519161	0.129678	4.00348	6.24e-05	0.00647167	glycine/betaine reductase C	WP_009903155.1
gene-UAB	UAB_RS0205865	1081.41	0.479262	0.123104	3.89315	9.9e-05	0.00995393	ABC transporter ATP-binding protein	WP_003437017.1
gene-UAB	UAB_RS0205875	870.739	0.549329	0.142133	3.86491	0.000111132	0.0108851	ABC transporter permease	WP_003437015.1
gene-UAB	UAB_RS0212035	1104.99	-0.481372	0.12576	-3.82771	0.000129343	0.0117657	4Fe-4S binding protein	WP_003433947.1
gene-UAB	UAB_RS0212090	4569.99	-0.359223	0.0938604	-3.82721	0.000129606	0.0117657	molybdopterin-dependent oxidoreductase	WP_077726223.1
gene-UAB	UAB_RS0214450	1100	0.692587	0.18094	3.82772	0.000129334	0.0117657	MFS transporter	WP_009903280.1
gene-UAB	UAB_RS0213275	5312.52	0.356291	0.0937499	3.80044	0.000144437	0.0127999	efflux RND transporter periplasmic adaptor subunit	WP_009897600.1
gene-UAB	UAB_RS0213475	13599.8	0.386854	0.102404	3.7777	0.000158281	0.0137005	ribosome-associated translation inhibitor RaiA	WP_009903196.1
gene-UAB	UAB_RS0211665	2752.47	-0.577666	0.153761	-3.7569	0.00017203	0.0145522	cation:proton antiporter	WP_003433135.1
gene-UAB	UAB_RS0212060	5702.91	-0.468612	0.125201	-3.74286	0.000181934	0.015048	amidohydrolase	WP_003433937.1
gene-UAB	UAB_RS0212860	9.59815	-3.05021	0.827945	-3.68408	0.000229535	0.0185723	PTS sugar transporter subunit IIA	WP_004454630.1
gene-UAB	UAB_RS0209680	5841.52	0.510569	0.138843	3.67731	0.000235707	0.018666	NifB/NifX family molybdenum-iron cluster-binding protein	WP_003430159.1
gene-UAB	UAB_RS0205580	13308.6	-0.467909	0.128249	-3.64844	0.000263832	0.020458	cold-shock protein	WP_003418660.1
gene-UAB	UAB_RS0213285	6200.79	0.334559	0.0926442	3.61122	0.000304759	0.0231492	TolC family protein	WP_021416872.1
gene-UAB	UAB_RS0211495	18439.9	-0.340001	0.0948795	-3.5835	0.000339021	0.0252367	ATP-binding cassette domain-containing protein	WP_003429004.1
gene-UAB	UAB_RS0218345	6129.47	0.365935	0.102545	3.56854	0.000358969	0.0261977	excinuclease ABC subunit UvrC	WP_003436264.1
gene-UAB	UAB_RS0217185	79992.4	0.318102	0.0893441	3.56041	0.000370271	0.0265029	type I glyceraldehyde-3-phosphate dehydrogenase	WP_003421962.1
gene-UAB	UAB_RS0213005	4478.54	0.525112	0.147779	3.55336	0.000380346	0.0267103	thiol reductase thioredoxin	WP_003416870.1
gene-UAB	UAB_RS0206565	33839.5	-0.289611	0.0817009	-3.54477	0.000392962	0.0270853	beta-ketoacyl-ACP synthase II	WP_003438103.1
gene-UAB	UAB_RS0214030	4394.76	-0.31173	0.0886319	-3.51713	0.000436237	0.0295214	sugar ABC transporter permease	WP_009903254.1
gene-UAB	UAB_RS0209280	102532	0.410224	0.116825	3.51143	0.000445698	0.029623	FAD-dependent oxidoreductase	WP_003436400.1
gene-UAB	UAB_RS0207175	35758.1	-0.367712	0.10609	-3.46603	0.0005282	0.0344905	50S ribosomal protein L19	WP_003419350.1
gene-UAB	UAB_RS0214025	5708.74	-0.35973	0.104242	-3.4509	0.000558713	0.035854	carbohydrate ABC transporter permease	WP_004454862.1
gene-UAB	UAB_RS0214455	3865.83	0.600811	0.174896	3.43524	0.000592021	0.0373475	amino acid permease	WP_009890849.1
gene-UAB	UAB_RS0201385	139.301	-1.05204	0.308005	-3.41565	0.000636303	0.0381033	tRNA?	0
gene-UAB	UAB_RS0204450	217.423	0.658472	0.192789	3.41551	0.000636634	0.0381033	BlaI/MecI/CopY family transcriptional regulator	WP_003426867.1
gene-UAB	UAB_RS0205480	816.239	0.49776	0.146252	3.40344	0.000665425	0.0381033	molybdate ABC transporter substrate-binding protein	WP_009895904.1
gene-UAB	UAB_RS0210085	1049.25	-0.591304	0.173386	-3.41033	0.000648851	0.0381033	type I glyceraldehyde-3-phosphate dehydrogenase	WP_003430259.1
gene-UAB	UAB_RS0213010	12723.8	0.559068	0.163523	3.4189	0.000628741	0.0381033	thioredoxin-disulfide reductase	WP_003416869.1
gene-UAB	UAB_RS0214685	12770.5	-0.338747	0.0994183	-3.40729	0.000656114	0.0381033	ABC transporter permease	WP_009897856.1
gene-UAB	UAB_RS0211750	22133.4	-0.297132	0.0878415	-3.3826	0.000718033	0.0404927	translational GTPase TypA	WP_003430621.1
gene-UAB	UAB_RS0212085	702.323	-0.426576	0.126314	-3.3771	0.000732555	0.0406951	4Fe-4S binding protein	WP_003433927.1
gene-UAB	UAB_RS0205860	679.835	0.619112	0.186249	3.32411	0.000887012	0.0471637	helix-turn-helix transcriptional regulator	WP_003418769.1
gene-UAB	UAB_RS0212030	5560.98	-0.304984	0.0916927	-3.32615	0.00088055	0.0471637	hydroxylamine reductase	WP_003433949.1
gene-UAB	UAB_RS0217170	36143	0.352579	0.105997	3.3263	0.000880085	0.0471637	2,3-bisphosphoglycerate-independent phosphoglycerate mutase	WP_025992040.1
gene-UAB	UAB_RS0218355	7772.43	0.37085	0.111968	3.31209	0.000926004	0.0485435	excinuclease ABC subunit UvrB	WP_009891935.1
gene-UAB	UAB_RS0216120	931.297	-0.418477	0.126729	-3.30215	0.000959452	0.0495983	glucose uptake protein	WP_009891331.1
gene-UAB	UAB_RS0204960	296.228	-0.708469	0.218271	-3.24582	0.00117115	0.0581656	BglG family transcription antiterminator	WP_009902146.1
gene-UAB	UAB_RS0205520	1863.28	0.321615	0.0990928	3.24559	0.00117206	0.0581656	NfeD family protein	WP_003437174.1
gene-UAB	UAB_RS0217355	9.05456	-2.68075	0.825873	-3.24596	0.00117055	0.0581656	ABC transporter ATP-binding protein	WP_009903640.1
gene-UAB	UAB_RS0204970	123.308	-0.813622	0.253347	-3.21149	0.00132048	0.0646687	PTS glucitol/sorbitol transporter subunit IIC	WP_009902147.1
gene-UAB	UAB_RS0212190	22.0123	-1.90329	0.595281	-3.1973	0.00138721	0.0670546	3-methyl-2-oxobutanoate dehydrogenase subunit VorB	WP_003433885.1
gene-UAB	UAB_RS0215695	962.799	-0.451487	0.142033	-3.17875	0.00147914	0.0705815	2-keto-3-deoxygluconate permease	WP_009893742.1
gene-UAB	UAB_RS0213575	4462.94	0.446206	0.140573	3.1742	0.00150251	0.0707893	nucleotide exchange factor GrpE	WP_025992033.1
gene-UAB	UAB_RS0212510	3912.52	-0.389314	0.122831	-3.16952	0.00152692	0.0710399	peptide MFS transporter	WP_009903115.1
gene-UAB	UAB_RS0216660	62.0294	-0.94804	0.30025	-3.1575	0.0015913	0.0731211	helix-turn-helix transcriptional regulator	WP_009903484.1
gene-UAB	UAB_RS0215865	270106	1.1431	0.362722	3.15146	0.00162456	0.0737393	bifunctional acetaldehyde-CoA/alcohol dehydrogenase	WP_009898069.1
gene-UAB	UAB_RS0208380	308.625	-0.507482	0.161438	-3.14351	0.00166934	0.0748587	YafY family transcriptional regulator	WP_009902531.1
gene-UAB	UAB_RS0213580	5359	0.395058	0.125821	3.13984	0.00169041	0.0749013	heat-inducible transcription repressor HrcA	WP_004454754.1
gene-UAB	UAB_RS0214460	2134.29	0.571674	0.182519	3.13214	0.00173537	0.0759888	aminopeptidase P family protein	WP_004454949.1
gene-UAB	UAB_RS0203725	2306.56	0.366409	0.118187	3.10026	0.00193353	0.0820995	hypothetical protein	WP_003417884.1
gene-UAB	UAB_RS0216635	4329.06	-0.33737	0.108861	-3.0991	0.0019411	0.0820995	family 1 glycosylhydrolase	WP_009903482.1
gene-UAB	UAB_RS0217565	3950.4	0.308923	0.0996011	3.1016	0.00192475	0.0820995	TSUP family transporter	WP_009891694.1
gene-UAB	UAB_RS0217190	30660.1	0.284825	0.0921456	3.09103	0.00199462	0.0834153	transcriptional regulator	WP_003429564.1
gene-UAB	UAB_RS0211215	79.4177	-0.845128	0.275451	-3.06816	0.00215381	0.0890719	VanZ family protein	WP_009893393.1
gene-UAB	UAB_RS02000000219920	25975.5	-0.388575	0.127139	-3.05631	0.00224081	0.0916516	hypothetical protein	WP_003429855.1
gene-UAB	UAB_RS0207155	11050.7	-0.283813	0.0930677	-3.04953	0.00229201	0.0927268	30S ribosomal protein S16	WP_003419338.1
gene-UAB	UAB_RS0203870	1824.77	-0.380747	0.125496	-3.03395	0.00241378	0.0966033	glutaminase A	WP_003417962.1
gene-UAB	UAB_RS0213110	142.288	-0.671514	0.222862	-3.01315	0.00258554	0.102377	hypothetical protein	WP_003430796.1
gene-UAB	UAB_RS0202085	4960.52	0.332923	0.111441	2.98743	0.00281338	0.110225	cardiolipin synthase	WP_009888027.1
gene-UAB	UAB_RS0202785	239.016	0.676885	0.228235	2.96573	0.00301962	0.117073	substrate-binding domain-containing protein	WP_003435917.1
gene-UAB	UAB_RS0219155	901.583	-0.347056	0.117882	-2.9441	0.003239	0.124284	DUF3794 domain-containing protein	WP_009898760.1
gene-UAB	UAB_RS0201100	33558.3	-0.351273	0.119715	-2.93426	0.00334348	0.124444	0	WP_003421180.1
gene-UAB	UAB_RS0202650	28204.3	0.284	0.0967433	2.9356	0.003329	0.124444	molecular chaperone HtpG	WP_003435963.1
gene-UAB	UAB_RS0217920	14803.2	0.308864	0.1051	2.93877	0.00329519	0.124444	glycyl radical protein	WP_009903701.1
gene-UAB	UAB_RS0204215	2811.66	0.514315	0.17619	2.91909	0.0035106	0.126859	4Fe-4S binding protein	WP_003418105.1
gene-UAB	UAB_RS0210175	7323.76	-0.301834	0.103362	-2.92015	0.00349864	0.126859	argininosuccinate synthase	WP_003439524.1
gene-UAB	UAB_RS0215315	173185	0.352978	0.120913	2.91928	0.00350837	0.126859	M60 family metallopeptidase	WP_009903330.1
gene-UAB	UAB_RS0200875	2766.67	0.34315	0.118065	2.90644	0.00365566	0.127162	0	WP_009901545.1
gene-UAB	UAB_RS0206540	13023.3	-0.303863	0.104484	-2.90823	0.0036348	0.127162	ketoacyl-ACP synthase III	WP_003438099.1
gene-UAB	UAB_RS0214950	3085.09	-0.261397	0.0897205	-2.91346	0.00357444	0.127162	polysaccharide deacetylase family protein	WP_009890976.1
gene-UAB	UAB_RS0215325	1330.63	0.314395	0.108134	2.90746	0.0036438	0.127162	cell wall-binding protein Cwp8	WP_009897969.1
gene-UAB	UAB_RS0215705	1322.27	-0.378673	0.131238	-2.88538	0.00390938	0.134729	UxaA family hydrolase	WP_009898047.1
gene-UAB	UAB_RS0203685	1738.2	-0.312118	0.10849	-2.87692	0.00401573	0.137124	response regulator transcription factor	WP_003439080.1
gene-UAB	UAB_RS0209230	208.212	0.494228	0.172241	2.86939	0.0041126	0.137902	hypothetical protein	WP_009902657.1
gene-UAB	UAB_RS0210650	26.7047	-1.32812	0.462843	-2.86947	0.00411156	0.137902	ethanolamine ammonia-lyase reactivating factor EutA	WP_009902833.1
gene-UAB	UAB_RS0214575	7730.96	-0.248687	0.0868312	-2.86403	0.00418288	0.139006	undecaprenyldiphospho-muramoylpentapeptide beta-N-acetylglucosaminyltransferase	WP_009893705.1
gene-UAB	UAB_RS0200095	366.444	-0.558371	0.195567	-2.85514	0.00430179	0.141693	0	0
gene-UAB	UAB_RS0210325	508.079	-0.441295	0.154828	-2.85024	0.00436864	0.142632	hypothetical protein	WP_003439467.1
gene-UAB	UAB_RS0205880	1748.22	0.386752	0.136018	2.84339	0.00446371	0.143223	spermidine/putrescine ABC transporter substrate-binding protein	WP_003437013.1
gene-UAB	UAB_RS0209875	8082.42	-0.313137	0.110038	-2.84571	0.0044313	0.143223	Mrp/NBP35 family ATP-binding protein	WP_003430209.1
gene-UAB	UAB_RS0206350	24784.1	-0.321616	0.11331	-2.83837	0.00453445	0.14425	RnfABCDGE type electron transport complex subunit B	WP_003428486.1
gene-UAB	UAB_RS0213085	12717.2	-0.244275	0.08658	-2.82138	0.00478171	0.148726	DsrE family protein	WP_003430785.1
gene-UAB	UAB_RS0213125	1125.88	-0.304159	0.107839	-2.82049	0.00479505	0.148726	NUDIX domain-containing protein	WP_009903163.1
gene-UAB	RS2000000221880	2997.35	0.32909	0.116636	2.82152	0.00477962	0.148726	#N/A	#N/A
gene-UAB	UAB_RS0207825	1150.16	-0.291767	0.103857	-2.80932	0.00496467	0.152715	glycerol kinase GlpK	WP_009902453.1
gene-UAB	UAB_RS0215475	524.962	0.340284	0.121452	2.8018	0.00508183	0.155037	winged helix-turn-helix transcriptional regulator	WP_003436142.1
gene-UAB	UAB_RS0215925	3075.57	0.394293	0.141013	2.79614	0.0051717	0.156496	CRISPR-associated helicase/endonuclease Cas3	WP_009903367.1
gene-UAB	UAB_RS0201075	45656.2	-0.351183	0.126046	-2.78616	0.0053337	0.160097	0	WP_003421186.1
gene-UAB	UAB_RS0212360	82.8953	0.739535	0.265894	2.78131	0.00541395	0.161206	formate/nitrite transporter family protein	WP_009890410.1
gene-UAB	UAB_RS0202335	1051.56	0.353525	0.127615	2.77024	0.00560151	0.162945	5-(carboxyamino)imidazole ribonucleotide mutase	WP_003425290.1
gene-UAB	UAB_RS0203495	9772.14	-0.261224	0.094301	-2.77011	0.0056037	0.162945	HAMP domain-containing histidine kinase	WP_009901933.1
gene-UAB	UAB_RS0218340	4025.82	0.284887	0.102658	2.77509	0.0055186	0.162945	HPr kinase/phosphorylase	WP_003416935.1
gene-UAB	UAB_RS0217895	103.404	0.657327	0.237915	2.76286	0.00572965	0.165316	PTS sugar transporter subunit IIC	WP_009903698.1
gene-UAB	UAB_RS0213665	2685.21	-0.327523	0.118779	-2.75741	0.0058261	0.166806	G5 domain-containing protein	WP_009890693.1
gene-UAB	UAB_RS02000000220800	49542.3	-0.412913	0.150573	-2.74229	0.00610128	0.170744	hypothetical protein	WP_004454815.1
gene-UAB	UAB_RS0203705	8430.03	0.229999	0.0837206	2.74722	0.00601034	0.170744	M20/M25/M40 family metallo-hydrolase	WP_009901979.1
gene-UAB	UAB_RS0216970	9.43476	-2.42131	0.88251	-2.74366	0.00607579	0.170744	hypothetical protein	WP_009903550.1
gene-UAB	UAB_RS0207960	1183.58	-0.323089	0.118008	-2.73787	0.00618386	0.171764	transcriptional regulator DdlR	WP_009902483.1
gene-UAB	UAB_RS0207980	2088.51	-0.342377	0.125327	-2.73188	0.00629739	0.173621	zinc dependent phospholipase C family protein	WP_003419819.1
gene-UAB	UAB_RS0213630	93375.5	-0.29662	0.108815	-2.7259	0.0064126	0.174951	30S ribosomal protein S20	WP_009890686.1
gene-UAB	UAB_RS0216555	16324.9	-0.213853	0.0784923	-2.72451	0.00643962	0.174951	M20 family metallopeptidase	WP_009903471.1
gene-UAB	UAB_RS0206325	32348.9	-0.292676	0.108026	-2.70931	0.00674235	0.181848	electron transport complex subunit RsxC	WP_003428488.1
gene-UAB	UAB_RS0206340	9122.33	-0.325016	0.120327	-2.7011	0.00691111	0.185059	electron transport complex subunit E	WP_003419045.1
gene-UAB	UAB_RS0207280	1265.56	0.281203	0.104329	2.69535	0.0070315	0.186937	Rrf2 family transcriptional regulator	WP_003419409.1
gene-UAB	UAB_RS0218350	10436.6	0.287652	0.106946	2.68968	0.00715197	0.188792	excinuclease ABC subunit UvrA	WP_003436266.1
gene-UAB	UAB_RS0207025	253.476	-0.488858	0.182543	-2.67803	0.00740555	0.194109	RNA polymerase sigma factor	WP_006354941.1
gene-UAB	UAB_RS0206335	8286.55	-0.305981	0.114357	-2.67566	0.00745813	0.19412	RnfABCDGE type electron transport complex subunit G	WP_009902280.1
gene-UAB	UAB_RS0204220	17442.3	0.411577	0.154501	2.66391	0.00772379	0.199638	4Fe-4S binding protein	WP_009902040.1
gene-UAB	UAB_RS0213490	22233	-0.369842	0.139153	-2.65781	0.00786501	0.201887	30S ribosomal protein S21	WP_003416618.1
gene-UAB	UAB_RS0201885	2738.77	-0.502322	0.189731	-2.64755	0.00810771	0.205667	recombinase family protein	WP_005927564.1
gene-UAB	UAB_RS0216065	516.484	0.37853	0.143007	2.64692	0.00812278	0.205667	iron-containing alcohol dehydrogenase	WP_009903393.1
gene-UAB	UAB_RS0211060	667.783	-0.338632	0.128386	-2.63761	0.00834926	0.208563	tryptophan transporter	WP_003435247.1
gene-UAB	UAB_RS0216010	3303.76	0.319694	0.121206	2.63761	0.00834923	0.208563	class 1b ribonucleoside-diphosphate reductase subunit alpha	WP_004453866.1
gene-UAB	UAB_RS0209995	630.468	-0.441239	0.168164	-2.62386	0.0086939	0.208766	hypothetical protein	WP_003430242.1
gene-UAB	UAB_RS0213065	40269	-0.209294	0.0796311	-2.6283	0.00858139	0.208766	ABC transporter substrate-binding protein	WP_004454662.1
gene-UAB	UAB_RS0213570	32849.1	0.362048	0.137838	2.62661	0.00862392	0.208766	molecular chaperone DnaK	WP_003430934.1
gene-UAB	UAB_RS0213710	685.792	0.419114	0.15968	2.62471	0.00867226	0.208766	transcription antiterminator	WP_009897679.1
gene-UAB	UAB_RS0216755	64.9252	0.739819	0.281007	2.63274	0.00846991	0.208766	hypothetical protein	WP_003440086.1
gene-UAB	UAB_RS0217395	1024.84	-0.299575	0.114163	-2.62409	0.00868796	0.208766	MATE family efflux transporter	WP_009891654.1
gene-UAB	UAB_RS0202145	8.77143	2.28511	0.873193	2.61696	0.00887176	0.211671	helix-turn-helix transcriptional regulator	WP_009901703.1
gene-UAB	UAB_RS0214695	11.0107	-2.02671	0.775974	-2.61182	0.0090061	0.213508	acetyl-CoA C-acetyltransferase	WP_009897857.1
gene-UAB	UAB_RS0214675	134069	-0.262686	0.100761	-2.60702	0.0091333	0.215153	ABC transporter substrate-binding protein	WP_004454985.1
gene-UAB	UAB_RS0212140	501.978	0.499379	0.191727	2.60464	0.00919709	0.215293	beta-phosphoglucomutase	WP_009903075.1
gene-UAB	UAB_RS0205890	118.731	0.761015	0.29401	2.5884	0.00964231	0.223669	DUF2334 domain-containing protein	WP_009902230.1
gene-UAB	UAB_RS0209325	444.637	-0.357561	0.138202	-2.58723	0.00967508	0.223669	asparagine synthase (glutamine-hydrolyzing)	WP_009902673.1
gene-UAB	UAB_RS0201310	229.108	-0.646436	0.251003	-2.57541	0.0100121	0.225849	0	0
gene-UAB	UAB_RS0206255	54516.2	0.344402	0.133575	2.57835	0.00992744	0.225849	nitroreductase family protein	WP_003438030.1
gene-UAB	UAB_RS0208450	393.017	0.423605	0.164132	2.58088	0.00985492	0.225849	ABC transporter permease	WP_009893090.1
gene-UAB	UAB_RS0218045	6688.11	0.268394	0.104178	2.57629	0.00998667	0.225849	metallophosphoesterase	WP_003435609.1
gene-UAB	UAB_RS0207180	2007.41	-0.269322	0.105063	-2.56344	0.0103642	0.232383	ribosome biogenesis GTPase YlqF	WP_003438227.1
gene-UAB	UAB_RS0205540	2136.34	0.314236	0.123177	2.5511	0.0107384	0.239332	glycogen synthase GlgA	WP_003437171.1
gene-UAB	UAB_RS0210800	6383.37	-0.306069	0.120229	-2.54571	0.0109056	0.240182	acetyl-CoA carboxylase biotin carboxyl carrier protein	WP_003428740.1
gene-UAB	UAB_RS0218920	47.9233	0.984648	0.386683	2.54639	0.0108843	0.240182	hypothetical protein	WP_009898731.1
gene-UAB	UAB_RS0207790	13389.7	-0.242095	0.095336	-2.53939	0.0111047	0.243128	hypothetical protein	WP_003419674.1
gene-UAB	UAB_RS0215700	89.6787	-0.705431	0.278247	-2.53527	0.0112361	0.243144	UxaA family hydrolase	WP_009891186.1
gene-UAB	UAB_RS0219285	1098.93	0.376353	0.14844	2.53539	0.0112323	0.243144	glutamine-hydrolyzing carbamoyl-phosphate synthase small subunit	WP_003435820.1
gene-UAB	UAB_RS02000000220525	4701.71	-0.242198	0.0957305	-2.53	0.0114063	0.245401	hypothetical protein	WP_003428626.1
gene-UAB	UAB_RS0207985	786.219	0.310374	0.122897	2.52549	0.0115537	0.245731	sigma 54-interacting transcriptional regulator	WP_009902485.1
gene-UAB	UAB_RS0208505	2044.1	-0.308168	0.122004	-2.52589	0.0115407	0.245731	DUF2520 domain-containing protein	WP_071605615.1
gene-UAB	UAB_RS02000000220660	281.316	-0.433318	0.17299	-2.50487	0.0122495	0.254707	hypothetical protein	WP_009889993.1
gene-UAB	UAB_RS0200010	607.154	-0.409907	0.16364	-2.50492	0.0122478	0.254707	0	0
gene-UAB	UAB_RS0214640	23757.6	-0.231108	0.092209	-2.50635	0.0121985	0.254707	UDP-N-acetylmuramoyl-L-alanyl-D-glutamate--2,6-diaminopimelate ligase	WP_009897839.1
gene-UAB	RS2000000221335	50.8488	-0.778312	0.310091	-2.50994	0.012075	0.254707	#N/A	#N/A
gene-UAB	UAB_RS0213100	1076.83	0.327835	0.131013	2.50231	0.0123384	0.255132	quinolinate synthase NadA	WP_004454668.1
gene-UAB	UAB_RS0209070	109.006	-0.60357	0.241522	-2.49902	0.0124537	0.256093	homoserine dehydrogenase	WP_003429993.1
gene-UAB	UAB_RS0205660	671.074	-0.334141	0.133941	-2.49469	0.0126069	0.257818	small multi-drug export protein	WP_003437111.1
gene-UAB	UAB_RS0205460	2369.58	0.300456	0.120541	2.49257	0.0126821	0.257939	protein-ADP-ribose hydrolase	WP_012816064.1
gene-UAB	UAB_RS0212245	3701.36	-0.292092	0.117413	-2.48773	0.012856	0.260054	GTPase HflX	WP_011861493.1
gene-UAB	UAB_RS0206555	10020.5	-0.255978	0.103316	-2.47763	0.0132259	0.265505	3-oxoacyl-[acyl-carrier-protein] reductase	WP_003428442.1
gene-UAB	UAB_RS0214810	23.6873	1.11448	0.450024	2.47649	0.0132681	0.265505	YjiG family protein	WP_004455006.1
gene-UAB	UAB_RS0212780	373.059	0.374898	0.151753	2.47044	0.0134948	0.268596	molybdate ABC transporter substrate-binding protein	WP_004454609.1
gene-UAB	UAB_RS0205790	663.515	0.349123	0.141624	2.46513	0.0136962	0.271156	N-acetylglucosamine-6-phosphate deacetylase	WP_009902217.1
gene-UAB	UAB_RS0213525	1153	0.358031	0.146275	2.44766	0.0143789	0.283165	DevR family CRISPR-associated autoregulator	WP_009903200.1
gene-UAB	UAB_RS0211045	3071.75	-0.244798	0.100297	-2.44074	0.014657	0.287124	tRNA (N6-isopentenyl adenosine(37)-C2)-methylthiotransferase MiaB	WP_003435252.1
gene-UAB	UAB_RS0200140	106.068	-0.720387	0.299658	-2.40403	0.0162154	0.287675	0	0
gene-UAB	UAB_RS0200855	16618.3	0.329516	0.136263	2.41823	0.015596	0.287675	0	WP_003425597.1
gene-UAB	UAB_RS0201300	44403.1	-0.265042	0.110076	-2.40782	0.0160482	0.287675	0	WP_003421105.1
gene-UAB	UAB_RS0201395	11.5476	-1.71784	0.706739	-2.43066	0.0150713	0.287675	0	0
gene-UAB	UAB_RS0202080	2939.34	0.239865	0.0997401	2.40489	0.0161771	0.287675	DNA glycosylase	WP_003435007.1
gene-UAB	UAB_RS0203675	104334	0.274768	0.112756	2.43684	0.0148161	0.287675	hypothetical protein	WP_003439078.1
gene-UAB	UAB_RS0205915	146.414	0.497456	0.206113	2.41351	0.0157998	0.287675	glucosaminidase domain-containing protein	WP_009902239.1
gene-UAB	UAB_RS0205930	826.457	0.311807	0.128805	2.42076	0.0154879	0.287675	hypothetical protein	WP_009902242.1
gene-UAB	UAB_RS0206455	8267.02	-0.356371	0.146364	-2.43483	0.0148987	0.287675	50S ribosomal protein L27	WP_003419086.1
gene-UAB	UAB_RS0206545	12955.7	-0.274767	0.11419	-2.40623	0.0161179	0.287675	enoyl-[acyl-carrier-protein] reductase FabK	WP_003419125.1
gene-UAB	UAB_RS0206560	4248.07	-0.259998	0.108067	-2.4059	0.0161325	0.287675	acyl carrier protein	WP_003419132.1
gene-UAB	UAB_RS0207295	4877.81	-0.237469	0.0979806	-2.42363	0.0153662	0.287675	tRNA 2-thiouridine(34) synthase MnmA	WP_003438277.1
gene-UAB	UAB_RS0207995	3274.29	-0.252772	0.10516	-2.40368	0.016231	0.287675	TIGR01212 family radical SAM protein	WP_009902494.1
gene-UAB	UAB_RS0211770	3279.74	0.247203	0.102526	2.41114	0.015903	0.287675	homoserine kinase	WP_009897262.1
gene-UAB	UAB_RS0214530	383.952	-0.324996	0.134055	-2.42435	0.0153358	0.287675	RNA polymerase sporulation sigma factor SigG	WP_003416101.1
gene-UAB	UAB_RS0214540	172.637	-0.528304	0.217826	-2.42534	0.0152939	0.287675	sigma-E processing peptidase SpoIIGA	WP_003426978.1
gene-UAB	UAB_RS0214680	14405.5	-0.252745	0.10415	-2.42673	0.0152357	0.287675	ABC transporter permease	WP_009897855.1
gene-UAB	UAB_RS0219280	4761.91	0.270056	0.111325	2.42583	0.0152732	0.287675	carbamoyl-phosphate synthase large subunit	WP_009903829.1
gene-UAB	UAB_RS0219610	1547.37	-0.353336	0.146413	-2.41328	0.0158096	0.287675	0	0
gene-UAB	UAB_RS0219700	7641.86	0.21485	0.0886762	2.42286	0.0153988	0.287675	tetratricopeptide repeat protein	WP_009894114.1
gene-UAB	UAB_RS0205530	1024.51	0.337612	0.140879	2.39647	0.0165536	0.292003	glucose-1-phosphate adenylyltransferase	WP_003418638.1
gene-UAB	UAB_RS0203500	6881.95	-0.216127	0.0902956	-2.39356	0.0166859	0.292948	response regulator transcription factor	WP_009901935.1
gene-UAB	UAB_RS0215310	50538.4	0.297451	0.124467	2.38979	0.0168581	0.294582	cell wall-binding protein Cwp10	WP_009903328.1
gene-UAB	UAB_RS02000000220010	2.63534	3.98855	1.67152	2.38618	0.0170245	0.295206	0	WP_016306500.1
gene-UAB	UAB_RS0210995	10131.7	0.269516	0.112977	2.38557	0.0170525	0.295206	DNA mismatch repair protein MutS	WP_009902880.1
gene-UAB	UAB_RS0211895	44.0031	-0.893264	0.375277	-2.38028	0.0172995	0.296723	potassium channel family protein	WP_009903039.1
gene-UAB	UAB_RS0214920	9256.24	-0.355476	0.149263	-2.38154	0.0172403	0.296723	0	0
gene-UAB	UAB_RS0204200	436.642	0.313387	0.13176	2.37848	0.0173842	0.296808	conserved phage C-terminal domain-containing protein	WP_009902039.1
gene-UAB	UAB_RS0210780	5867.66	-0.22475	0.0946201	-2.37529	0.0175352	0.297509	stage V sporulation protein S	WP_003428736.1
gene-UAB	UAB_RS0218315	24640.9	0.214158	0.0902009	2.37424	0.0175852	0.297509	cardiolipin synthase	WP_003429110.1
gene-UAB	UAB_RS0219675	42040.6	-0.243425	0.102673	-2.37087	0.0177462	0.298876	30S ribosomal protein S6	WP_003420522.1
gene-UAB	UAB_RS0202985	27537.2	0.239347	0.101032	2.36902	0.0178353	0.299022	DUF4132 domain-containing protein	WP_009901788.1
gene-UAB	UAB_RS0203730	4364.22	0.316763	0.133852	2.36652	0.0179561	0.299698	DUF3100 domain-containing protein	WP_009901985.1
gene-UAB	UAB_RS0204575	3539.17	0.21746	0.0919989	2.36373	0.0180922	0.300621	hypothetical protein	WP_009902102.1
gene-UAB	UAB_RS0206330	14662.7	-0.313417	0.132762	-2.36074	0.0182386	0.301708	RnfABCDGE type electron transport complex subunit D	WP_003428487.1
gene-UAB	UAB_RS0217530	3247.43	-0.331889	0.141096	-2.35222	0.0186619	0.307343	hypoxanthine phosphoribosyltransferase	WP_009891688.1
gene-UAB	UAB_RS02000000220160	6429.17	-0.206895	0.0882296	-2.34497	0.0190287	0.312004	transposase	WP_009901937.1
gene-UAB	UAB_RS0218240	126.841	-0.53936	0.230175	-2.34326	0.019116	0.31206	ribosome small subunit-dependent GTPase A	WP_009903732.1
gene-UAB	UAB_RS0201070	78234.8	-0.217996	0.0931585	-2.34006	0.0192808	0.313376	0	WP_003421187.1
gene-UAB	UAB_RS0204065	4735.2	0.214132	0.0915922	2.33789	0.019393	0.313829	DUF3440 domain-containing protein	WP_003438907.1
gene-UAB	UAB_RS0202340	1085.94	0.334133	0.143151	2.33413	0.0195892	0.314271	phosphoribosylaminoimidazolesuccinocarboxamide synthase	WP_003420966.1
gene-UAB	RS2000000221610	74.1069	0.633207	0.271277	2.33417	0.0195869	0.314271	#N/A	#N/A
gene-UAB	UAB_RS0206345	7353.27	-0.275696	0.119124	-2.31436	0.0206478	0.326447	electron transport complex subunit RsxA	WP_003419046.1
gene-UAB	UAB_RS0206550	13809.9	-0.225774	0.0976036	-2.31317	0.0207134	0.326447	ACP S-malonyltransferase	WP_009902293.1
gene-UAB	UAB_RS0208475	400.481	-0.390025	0.168499	-2.3147	0.0206294	0.326447	lipoprotein	WP_009896453.1
gene-UAB	UAB_RS0214465	1725.93	0.297419	0.128341	2.31741	0.0204816	0.326447	TetR/AcrR family transcriptional regulator	WP_003426952.1
gene-UAB	UAB_RS0216600	43.7374	0.897444	0.388462	2.31025	0.0208743	0.326447	YitT family protein	WP_003440008.1
gene-UAB	UAB_RS0218765	823.95	-0.269613	0.11668	-2.31071	0.0208487	0.326447	Ppx/GppA family phosphatase	WP_009903793.1
gene-UAB	UAB_RS0205855	737.865	-0.282203	0.122308	-2.30731	0.0210375	0.327621	membrane protein	WP_009902228.1
gene-UAB	UAB_RS0205400	353.03	-0.4414	0.191641	-2.30327	0.0212637	0.328396	winged helix-turn-helix transcriptional regulator	WP_004453602.1
gene-UAB	UAB_RS0210885	497.233	0.300249	0.130315	2.30403	0.0212207	0.328396	ABC transporter ATP-binding protein	WP_003435313.1
gene-UAB	UAB_RS0207945	9634.3	-0.312343	0.135998	-2.29668	0.0216373	0.331416	PqqD family protein	WP_009889198.1
gene-UAB	UAB_RS0219665	25904.7	-0.258574	0.112545	-2.29751	0.0215895	0.331416	30S ribosomal protein S18	WP_003420527.1
gene-UAB	UAB_RS0200655	41.3512	-0.987441	0.430884	-2.29166	0.0219253	0.33445	hypothetical protein	WP_009894737.1
gene-UAB	UAB_RS0204865	872.016	-0.295546	0.129337	-2.28508	0.0223081	0.336157	flagellar motor protein	WP_009895793.1
gene-UAB	UAB_RS0212480	537.951	0.313649	0.137185	2.28633	0.0222351	0.336157	PLP-dependent aminotransferase family protein	WP_009903110.1
gene-UAB	UAB_RS0218260	2187.26	-0.267452	0.11697	-2.2865	0.0222251	0.336157	23S rRNA (uracil(1939)-C(5))-methyltransferase RlmD	WP_009903736.1
gene-UAB	UAB_RS0202090	3369.35	0.274808	0.120459	2.28134	0.0225285	0.338109	0	WP_003420907.1
gene-UAB	UAB_RS0211765	4615.59	0.248657	0.109133	2.27848	0.0226977	0.339182	threonine synthase	WP_009903017.1
gene-UAB	UAB_RS0213150	4112.3	-0.210135	0.0922832	-2.27707	0.0227823	0.339182	aminotransferase class I/II-fold pyridoxal phosphate-dependent enzyme	WP_004454678.1
gene-UAB	UAB_RS0203375	641.754	0.274903	0.121402	2.26441	0.023549	0.346502	cell wall-binding protein Cwp27	WP_009901899.1
gene-UAB	UAB_RS0212450	248.61	-0.369755	0.163113	-2.26686	0.0233986	0.346502	S8 family serine peptidase	WP_009903108.1
gene-UAB	UAB_RS0214630	7959.62	-0.24595	0.108619	-2.26434	0.0235532	0.346502	redox-regulated ATPase YchF	WP_003427022.1
gene-UAB	UAB_RS0207215	912.82	-0.262596	0.116135	-2.26112	0.0237517	0.348047	CarD family transcriptional regulator	WP_009896172.1
gene-UAB	UAB_RS0214985	1144.15	-0.252049	0.111659	-2.25731	0.0239887	0.350141	hypothetical protein	WP_003426410.1
gene-UAB	UAB_RS0213000	32188	0.595788	0.264574	2.25187	0.0243304	0.353741	glycine/sarcosine/betaine reductase component B subunit	WP_003416871.1
gene-UAB	UAB_RS0218450	1748.73	0.260637	0.11594	2.24805	0.0245732	0.354502	serine/threonine protein kinase	WP_009903762.1
gene-UAB	UAB_RS0219745	6162.7	-0.193303	0.0859434	-2.24919	0.0245006	0.354502	protein jag	WP_003434235.1
gene-UAB	UAB_RS0205465	1895.18	0.278376	0.124096	2.24323	0.0248821	0.357573	alpha/beta hydrolase	WP_004454199.1
gene-UAB	UAB_RS0207670	104771	-0.271537	0.121291	-2.23872	0.0251741	0.360377	cold-shock protein	WP_003419624.1
gene-UAB	UAB_RS02000000220420	2300.65	-0.221914	0.0995254	-2.22973	0.0257656	0.363303	murein biosynthesis integral membrane protein MurJ	WP_009902536.1
gene-UAB	UAB_RS0206300	1570.46	-0.335786	0.150756	-2.22735	0.0259238	0.363303	heavy-metal-associated domain-containing protein	WP_003428495.1
gene-UAB	UAB_RS0212665	56.8938	0.693337	0.311368	2.22675	0.0259642	0.363303	helix-turn-helix transcriptional regulator	WP_003423177.1
gene-UAB	UAB_RS0216715	271.826	-0.350729	0.157258	-2.23028	0.025729	0.363303	family 1 glycosylhydrolase	WP_009903499.1
gene-UAB	UAB_RS0217885	226.789	0.420002	0.188071	2.2332	0.0255354	0.363303	SIS domain-containing protein	WP_003432374.1
gene-UAB	UAB_RS0219670	46792.7	-0.222208	0.0997863	-2.22684	0.0259578	0.363303	single-stranded DNA-binding protein	WP_003420524.1
gene-UAB	UAB_RS0205310	1441.44	0.244631	0.110274	2.21838	0.026529	0.365707	MarR family transcriptional regulator	WP_021369334.1
gene-UAB	UAB_RS0210375	3688.81	0.359392	0.161966	2.21893	0.0264913	0.365707	thioredoxin-dependent thiol peroxidase	WP_003439443.1
gene-UAB	UAB_RS0212985	39463	0.605869	0.272754	2.2213	0.0263304	0.365707	glycine reductase complex selenoprotein B	WP_011861534.1
gene-UAB	UAB_RS0218270	9940.88	0.276442	0.124492	2.22057	0.0263802	0.365707	6-phosphofructokinase	WP_003429132.1
gene-UAB	UAB_RS0202655	2350.23	0.259316	0.117395	2.20892	0.0271801	0.36673	iron-containing alcohol dehydrogenase	WP_009901770.1
gene-UAB	UAB_RS0203710	11927.7	0.189108	0.0855137	2.21143	0.0270057	0.36673	AbgT family transporter	WP_009901981.1
gene-UAB	UAB_RS0204955	13289.4	-0.214725	0.0971869	-2.2094	0.0271466	0.36673	DEAD/DEAH box helicase	WP_003437464.1
gene-UAB	UAB_RS0206770	914.059	-0.258052	0.116639	-2.21239	0.0269397	0.36673	pyrimidine-nucleoside phosphorylase	WP_009896135.1
gene-UAB	UAB_RS0207285	26311.9	0.297462	0.134676	2.20872	0.0271944	0.36673	cysteine desulfurase NifS	WP_009896192.1
gene-UAB	UAB_RS0217840	850.677	0.253636	0.114509	2.21498	0.0267612	0.36673	sensor histidine kinase	WP_009903688.1
gene-UAB	UAB_RS0204350	374.763	0.366404	0.166014	2.20706	0.0273097	0.366955	ABC transporter ATP-binding protein	WP_009895681.1
gene-UAB	UAB_RS0203975	348.438	0.335864	0.152486	2.20259	0.0276237	0.36984	TetR/AcrR family transcriptional regulator	WP_009902006.1
gene-UAB	UAB_RS0212475	2329.35	0.209756	0.0953335	2.20023	0.0277904	0.370327	glutamate 2,3-aminomutase	WP_003430434.1
gene-UAB	UAB_RS0214775	6124.54	-0.253821	0.115412	-2.19927	0.0278591	0.370327	hypoxanthine phosphoribosyltransferase	WP_003416006.1
gene-UAB	UAB_RS0205490	869.168	-0.276886	0.126039	-2.19684	0.028032	0.371299	sulfate/molybdate ABC transporter ATP-binding protein	WP_009895906.1
gene-UAB	UAB_RS0205130	7.46128	-1.73058	0.790928	-2.18804	0.028667	0.377027	hydroxymethylglutaryl-CoA lyase	WP_009895827.1
gene-UAB	UAB_RS0216230	1222.75	0.311642	0.142396	2.18856	0.0286286	0.377027	hypothetical protein	WP_003432058.1
gene-UAB	UAB_RS0201530	43.962	-0.90361	0.414401	-2.18052	0.0292187	0.37727	0	WP_003425440.1
gene-UAB	UAB_RS0204645	723.157	-0.337492	0.154944	-2.17815	0.029395	0.37727	8-oxo-dGTP diphosphatase	WP_003436879.1
gene-UAB	UAB_RS0208500	1811.01	-0.260169	0.119208	-2.18247	0.0290746	0.37727	3-methyl-2-oxobutanoate hydroxymethyltransferase	WP_009902544.1
gene-UAB	UAB_RS0217965	133.138	0.574442	0.263289	2.18179	0.0291247	0.37727	hypothetical protein	WP_003435629.1
gene-UAB	UAB_RS0218665	19139.4	0.24178	0.110982	2.17856	0.0293644	0.37727	F0F1 ATP synthase subunit B	WP_009892033.1
gene-UAB	UAB_RS0219290	715.723	0.270744	0.12398	2.18376	0.0289797	0.37727	orotidine-5'-phosphate decarboxylase	WP_003429162.1
gene-UAB	RS2000000221975	4.07991	-3.45413	1.58201	-2.18338	0.0290081	0.37727	#N/A	#N/A
gene-UAB	UAB_RS0207040	9253.36	-0.299848	0.137993	-2.17293	0.0297854	0.378643	site-specific integrase	WP_009902371.1
gene-UAB	UAB_RS0208065	299.36	-0.381587	0.175448	-2.17492	0.0296359	0.378643	helix-turn-helix transcriptional regulator	WP_003429379.1
gene-UAB	UAB_RS0209445	21069.3	-0.299737	0.138131	-2.16995	0.0300106	0.378643	0	0
gene-UAB	UAB_RS0214655	13108.7	-0.186833	0.0860242	-2.17187	0.0298654	0.378643	PRD domain-containing protein	WP_009897844.1
gene-UAB	UAB_RS0218740	35458	-0.250254	0.115286	-2.17072	0.0299523	0.378643	50S ribosomal protein L31	WP_003421397.1
gene-UAB	UAB_RS0202000	67044.8	0.273152	0.126204	2.16437	0.030436	0.381564	0	WP_009888019.1
gene-UAB	UAB_RS0207925	2846.44	0.235244	0.108697	2.16422	0.0304472	0.381564	cysteine hydrolase	WP_009902469.1
gene-UAB	UAB_RS0202010	41205.2	0.278517	0.129092	2.15751	0.0309658	0.385228	0	WP_009892576.1
gene-UAB	UAB_RS0206885	39.72	-0.855463	0.396656	-2.15669	0.03103	0.385228	replication initiation factor domain-containing protein	WP_165472507.1
gene-UAB	UAB_RS0209690	2833.47	-0.205551	0.09532	-2.15643	0.03105	0.385228	ArsB/NhaD family transporter	WP_003430161.1
gene-UAB	UAB_RS0206220	929.343	0.292504	0.135802	2.15391	0.0312475	0.38639	formate C-acetyltransferase/glycerol dehydratase family glycyl radical enzyme	WP_003438022.1
gene-UAB	UAB_RS02000000220430	910.538	-0.313737	0.145863	-2.1509	0.0314842	0.386662	hypothetical protein	WP_003420092.1
gene-UAB	UAB_RS0203720	12639.6	0.261069	0.121651	2.14606	0.0318685	0.386662	amidohydrolase	WP_009888329.1
gene-UAB	UAB_RS0204455	249.267	0.421018	0.196271	2.14508	0.0319463	0.386662	glyoxalase	WP_009888463.1
gene-UAB	UAB_RS0213690	212.477	0.373443	0.174132	2.14459	0.0319853	0.386662	aminopeptidase P family protein	WP_009897674.1
gene-UAB	UAB_RS0213890	4089.78	-0.226577	0.105657	-2.14445	0.0319968	0.386662	ribosome silencing factor	WP_003416416.1
gene-UAB	RS2000000221145	150312	-0.563774	0.262356	-2.14889	0.031643	0.386662	#N/A	#N/A
gene-UAB	RS2000000221900	39.7966	0.80224	0.373435	2.14827	0.0316921	0.386662	#N/A	#N/A
gene-UAB	UAB_RS0204980	184.151	-0.447879	0.209096	-2.14197	0.0321957	0.387808	PTS glucitol/sorbitol transporter subunit IIA	WP_003437468.1
gene-UAB	UAB_RS0202800	137.162	0.455695	0.213037	2.13905	0.0324319	0.389087	M20 family metallopeptidase	WP_009901781.1
gene-UAB	UAB_RS0212365	76.8598	0.619419	0.289709	2.13807	0.032511	0.389087	sulfite reductase subunit C	WP_003433832.1
gene-UAB	UAB_RS0211645	444.565	-0.369797	0.173115	-2.13613	0.0326686	0.38972	hypothetical protein	WP_003433131.1
gene-UAB	UAB_RS0219545	58.8792	0.716864	0.336127	2.13272	0.0329476	0.391792	DgaE family pyridoxal phosphate-dependent ammonia lyase	WP_009898827.1
gene-UAB	UAB_RS0208595	310.046	0.343415	0.161263	2.12953	0.0332105	0.392631	response regulator transcription factor	WP_003436727.1
gene-UAB	UAB_RS0216200	311.719	0.392675	0.184415	2.1293	0.0332291	0.392631	TrmB family transcriptional regulator	WP_003432043.1
gene-UAB	UAB_RS0201095	49218.2	-0.233879	0.109977	-2.12662	0.0334521	0.394014	0	WP_003436176.1
gene-UAB	UAB_RS0203570	311.532	-0.408548	0.192694	-2.12019	0.0339897	0.396711	response regulator transcription factor	WP_009901954.1
gene-UAB	UAB_RS0204870	641.108	-0.272901	0.128819	-2.11848	0.0341342	0.396711	OmpA family protein	WP_009902133.1
gene-UAB	UAB_RS0205445	156.178	-0.453509	0.214168	-2.11754	0.0342139	0.396711	PTS sugar transporter subunit IIC	WP_009892810.1
gene-UAB	UAB_RS0210680	14.6384	-1.30437	0.615286	-2.11994	0.034011	0.396711	ethanolamine utilization microcompartment protein EutM	WP_003423991.1
gene-UAB	UAB_RS0215935	725.361	0.359632	0.169608	2.12037	0.0339752	0.396711	type I-B CRISPR-associated protein Cas7/Cst2/DevR	WP_009903369.1
gene-UAB	UAB_RS0202050	828.026	0.290912	0.137623	2.11384	0.0345293	0.397889	0	WP_003434506.1
gene-UAB	UAB_RS0206410	114.934	-0.5404	0.255515	-2.11495	0.0344342	0.397889	helix-turn-helix transcriptional regulator	WP_003419063.1
gene-UAB	UAB_RS0201595	586.532	0.295822	0.140057	2.11216	0.0346725	0.398305	0	WP_003434422.1
gene-UAB	UAB_RS0204145	129.914	0.487544	0.231977	2.10169	0.0355802	0.405036	ABC transporter permease	WP_009902032.1
gene-UAB	UAB_RS0207975	2707.38	-0.192904	0.0917874	-2.10164	0.0355848	0.405036	Cof-type HAD-IIB family hydrolase	WP_003438534.1
gene-UAB	UAB_RS0217390	1948.86	0.251131	0.119468	2.10208	0.0355458	0.405036	hypothetical protein	WP_009898334.1
gene-UAB	UAB_RS0201565	16531.4	0.260714	0.124719	2.09042	0.0365804	0.406424	0	WP_003434417.1
gene-UAB	UAB_RS0201935	870.907	0.272996	0.13028	2.09546	0.0361298	0.406424	0	WP_003434455.1
gene-UAB	UAB_RS0203015	404.576	-0.314351	0.150331	-2.09106	0.0365223	0.406424	metallophosphoesterase	WP_009901791.1
gene-UAB	UAB_RS0205200	7874.89	0.195424	0.0934699	2.09077	0.0365485	0.406424	universal stress protein	WP_003418487.1
gene-UAB	UAB_RS0214365	64457.4	0.213667	0.101856	2.09773	0.0359291	0.406424	aminopeptidase P family protein	WP_009903275.1
gene-UAB	UAB_RS0214940	4850.78	-0.177586	0.0848785	-2.09224	0.0364173	0.406424	response regulator transcription factor	WP_003426384.1
gene-UAB	UAB_RS0215065	4827.92	0.181461	0.0865209	2.09731	0.0359661	0.406424	single-stranded-DNA-specific exonuclease RecJ	WP_009903319.1
gene-UAB	UAB_RS0216225	2423.64	0.3029	0.144586	2.09494	0.0361764	0.406424	ATP-binding protein	WP_009903421.1
gene-UAB	UAB_RS0215680	2659.3	0.21922	0.105038	2.08705	0.0368833	0.40857	TldD/PmbA family protein	WP_009898042.1
gene-UAB	UAB_RS0200880	10819	0.209814	0.100643	2.08474	0.037093	0.409674	0	WP_003425582.1
gene-UAB	UAB_RS0201105	186523	-0.232823	0.112044	-2.07796	0.0377131	0.411249	0	WP_003436178.1
gene-UAB	UAB_RS0204835	1254.59	0.312215	0.150817	2.07015	0.038438	0.411249	hypothetical protein	WP_009902129.1
gene-UAB	UAB_RS0205005	847.148	0.239646	0.11577	2.07001	0.038451	0.411249	RNA polymerase sporulation sigma factor SigF	WP_003418417.1
gene-UAB	UAB_RS0205745	110.776	-0.48729	0.234156	-2.08105	0.0374292	0.411249	ABC transporter ATP-binding protein	WP_009902214.1
gene-UAB	UAB_RS0206445	27245.3	-0.280594	0.135166	-2.07593	0.0379006	0.411249	50S ribosomal protein L21	WP_003419082.1
gene-UAB	UAB_RS0208845	617.952	-0.248844	0.119868	-2.07598	0.0378956	0.411249	hypothetical protein	WP_003433505.1
gene-UAB	UAB_RS0212990	8170.3	0.596038	0.287698	2.07175	0.0382886	0.411249	glycine/betaine reductase A	WP_011861535.1
gene-UAB	UAB_RS0213600	12584	-0.180362	0.087127	-2.0701	0.0384428	0.411249	elongation factor 4	WP_003416556.1
gene-UAB	UAB_RS0213985	7321.4	0.246334	0.118993	2.07015	0.038438	0.411249	CoA-disulfide reductase	WP_009903243.1
gene-UAB	UAB_RS0214660	30749.6	-0.20313	0.0978597	-2.07573	0.037919	0.411249	sodium:proton antiporter	WP_009897846.1
gene-UAB	UAB_RS0214960	20237.7	0.181554	0.0874845	2.07527	0.0379618	0.411249	serine hydroxymethyltransferase	WP_003422953.1
gene-UAB	UAB_RS0203665	877.249	-0.258093	0.124813	-2.06784	0.038655	0.412246	threonine/serine exporter family protein	WP_009888325.1
gene-UAB	UAB_RS0217505	19103	0.190583	0.0926961	2.05599	0.0397832	0.423065	4-hydroxy-tetrahydrodipicolinate reductase	WP_003438808.1
gene-UAB	UAB_RS0202790	128.873	0.51914	0.252855	2.05311	0.0400617	0.424813	sugar ABC transporter ATP-binding protein	WP_009901779.1
gene-UAB	UAB_RS0202305	475.964	0.295044	0.143867	2.0508	0.040286	0.425051	0	WP_009901731.1
gene-UAB	UAB_RS0204545	31015.1	-0.215487	0.105088	-2.05053	0.0403125	0.425051	50S ribosomal protein L20	WP_003429730.1
gene-UAB	UAB_RS0201055	19656.5	-0.181268	0.0885036	-2.04814	0.040546	0.426305	0	WP_003421190.1
gene-UAB	UAB_RS0212220	830.746	-0.279732	0.136665	-2.04685	0.0406729	0.426436	esterase family protein	WP_009897364.1
gene-UAB	UAB_RS0216720	428.517	-0.280945	0.137376	-2.04508	0.0408474	0.427061	helix-turn-helix domain-containing protein	WP_003431317.1
gene-UAB	UAB_RS0215370	377.064	-0.329132	0.161376	-2.03954	0.0413964	0.431589	crossover junction endodeoxyribonuclease RuvC	WP_003422814.1
gene-UAB	UAB_RS0207575	695.123	-0.269357	0.132254	-2.03666	0.0416839	0.433373	PTS transporter subunit EIIC	WP_009902415.1
gene-UAB	UAB_RS0205545	3550.79	0.247717	0.121786	2.03404	0.0419476	0.433692	glycogen/starch/alpha-glucan phosphorylase	WP_009895917.1
gene-UAB	UAB_RS0211270	429.203	0.368694	0.181261	2.03405	0.0419468	0.433692	ABC-2 transporter permease	WP_009902946.1
gene-UAB	UAB_RS0206205	97.2244	0.510174	0.251553	2.0281	0.0425505	0.437265	two-component system response regulator RgbR	WP_009902266.1
gene-UAB	UAB_RS0213170	319.515	-0.327641	0.161505	-2.02868	0.0424913	0.437265	DUF3785 domain-containing protein	WP_009903174.1
gene-UAB	UAB_RS0217195	3608.34	0.251809	0.124217	2.02716	0.0426456	0.437265	RNA polymerase factor sigma-54	WP_003421965.1
gene-UAB	UAB_RS0206965	19004.3	-0.271001	0.134076	-2.02124	0.0432545	0.438183	alpha/beta hydrolase	WP_003434324.1
gene-UAB	UAB_RS0209390	2916.63	0.216622	0.10732	2.01846	0.0435429	0.438183	DUF819 domain-containing protein	WP_009889545.1
gene-UAB	UAB_RS0215160	12696.2	-0.195665	0.0968387	-2.02052	0.0433295	0.438183	LCP family protein	WP_004454115.1
gene-UAB	UAB_RS0215255	1821.79	0.187538	0.0928374	2.02006	0.0433768	0.438183	DUF5009 domain-containing protein	WP_009903324.1
gene-UAB	RS2000000221170	160683	-0.633065	0.312745	-2.02422	0.0429474	0.438183	#N/A	#N/A
gene-UAB	RS2000000221850	19489.1	-0.317933	0.157484	-2.01883	0.0435051	0.438183	#N/A	#N/A
gene-UAB	RS2000000221985	991.574	0.24323	0.120512	2.01831	0.0435593	0.438183	#N/A	#N/A
gene-UAB	UAB_RS0202095	26424.6	0.2504	0.124371	2.01333	0.0440804	0.44223	0	WP_009901692.1
gene-UAB	UAB_RS0209610	527.015	0.315621	0.157058	2.00958	0.0444759	0.442532	flavodoxin domain-containing protein	WP_003430144.1
gene-UAB	UAB_RS0210380	3962.69	0.247818	0.123451	2.00742	0.044705	0.442532	peroxide stress protein YaaA	WP_003439442.1
gene-UAB	UAB_RS0211010	2476.87	0.185196	0.0922356	2.00786	0.044658	0.442532	ABC transporter permease	WP_009893372.1
gene-UAB	UAB_RS0216790	68.5529	-0.642202	0.319619	-2.00928	0.0445079	0.442532	ABC transporter ATP-binding protein	WP_009903509.1
gene-UAB	RS2000000221890	2153.46	0.224058	0.111418	2.01097	0.0443286	0.442532	#N/A	#N/A
gene-UAB	UAB_RS0203655	5116.3	0.169797	0.0847083	2.00449	0.0450174	0.443353	D-alanyl-D-alanine carboxypeptidase	WP_021386963.1
gene-UAB	UAB_RS0205770	5139.49	0.203205	0.101379	2.00441	0.0450261	0.443353	GNAT family N-acetyltransferase	WP_021360381.1
gene-UAB	UAB_RS0200715	20.7761	0.971734	0.485813	2.00022	0.0454762	0.444018	hypothetical protein	WP_009894710.1
gene-UAB	UAB_RS0205955	1460.79	0.268112	0.1341	1.99935	0.0455709	0.444018	exonuclease SbcCD subunit D	WP_003437948.1
gene-UAB	UAB_RS0211775	16860.8	-0.226507	0.113132	-2.00214	0.0452695	0.444018	nitronate monooxygenase	WP_032506644.1
gene-UAB	UAB_RS0216630	14.6932	1.30857	0.653786	2.00152	0.0453364	0.444018	hypothetical protein	WP_003427320.1
gene-UAB	UAB_RS02000000220345	11.5192	-1.61631	0.811048	-1.99287	0.0462756	0.444199	hypothetical protein	WP_003419462.1
gene-UAB	UAB_RS0201960	973.356	0.214725	0.108253	1.98355	0.0473064	0.444199	0	WP_009901682.1
gene-UAB	UAB_RS0202360	3516.12	0.270011	0.135664	1.9903	0.0465584	0.444199	0	WP_009901734.1
gene-UAB	UAB_RS0205070	4401.68	-0.20294	0.101843	-1.99267	0.0462971	0.444199	ABC-F family ATP-binding cassette domain-containing protein	WP_009902156.1
gene-UAB	UAB_RS0205775	4555.57	0.183764	0.0924486	1.98774	0.04684	0.444199	zinc ribbon domain-containing protein	WP_003418727.1
gene-UAB	UAB_RS0206155	5906.76	-0.237007	0.119502	-1.98329	0.047335	0.444199	LysR family transcriptional regulator	WP_003438004.1
gene-UAB	UAB_RS0208025	1843.5	-0.20449	0.102929	-1.98671	0.046954	0.444199	diguanylate cyclase	WP_009902497.1
gene-UAB	UAB_RS0208495	2845.97	-0.2801	0.141214	-1.98351	0.0473101	0.444199	pantoate--beta-alanine ligase	WP_009902543.1
gene-UAB	UAB_RS0209685	2255.15	-0.200993	0.101363	-1.98289	0.0473796	0.444199	hypothetical protein	WP_003430160.1
gene-UAB	UAB_RS0211005	4829.04	0.199664	0.10044	1.98789	0.0468233	0.444199	ABC transporter substrate-binding protein	WP_003428792.1
gene-UAB	UAB_RS0211370	132.936	-0.458985	0.231086	-1.98621	0.0470101	0.444199	DUF2975 domain-containing protein	WP_003435151.1
gene-UAB	UAB_RS0215240	5868.29	-0.177349	0.0891838	-1.98858	0.0467473	0.444199	cell wall-binding protein Cwp7	WP_004454105.1
gene-UAB	UAB_RS0216125	20508.5	-0.192934	0.097076	-1.98745	0.0468728	0.444199	C-GCAxxG-C-C family protein	WP_009903399.1
gene-UAB	UAB_RS0217280	767.128	-0.279415	0.140849	-1.98379	0.0472793	0.444199	aldo/keto reductase	WP_009903616.1
gene-UAB	UAB_RS0219645	4345.66	0.209971	0.10518	1.9963	0.045901	0.444199	50S ribosomal protein L9	WP_003429267.1
gene-UAB	UAB_RS0216380	1355.15	0.197637	0.0998443	1.97945	0.0477655	0.446692	glycosyl hydrolase	WP_003439934.1
gene-UAB	UAB_RS0218660	8434.45	0.226656	0.114695	1.97617	0.0481353	0.449021	F0F1 ATP synthase subunit delta	WP_003425856.1
gene-UAB	UAB_RS0202045	3564.22	0.184054	0.0932207	1.97439	0.0483373	0.449778	0	WP_003434504.1
gene-UAB	UAB_RS0201940	3103.23	0.219676	0.111399	1.97197	0.0486128	0.450091	0	WP_009901677.1
gene-UAB	UAB_RS0205535	897.432	0.29955	0.151859	1.97255	0.0485471	0.450091	glucose-1-phosphate adenylyltransferase subunit GlgD	WP_003418641.1
gene-UAB	UAB_RS0216005	1301.75	0.203695	0.10337	1.97053	0.0487771	0.450492	class 1b ribonucleoside-diphosphate reductase subunit beta	WP_003439817.1
gene-UAB	UAB_RS02000000220220	2760.36	-0.229674	0.116763	-1.96701	0.0491816	0.451284	chloride channel protein	WP_009902023.1
gene-UAB	UAB_RS0204435	6.16412	2.33699	1.19248	1.95977	0.0500232	0.451284	ABC transporter ATP-binding protein	WP_009895699.1
gene-UAB	UAB_RS0204470	234.229	-0.354984	0.180657	-1.96496	0.049419	0.451284	GNAT family N-acetyltransferase	WP_003439164.1
gene-UAB	UAB_RS0205910	153.29	-0.403101	0.205817	-1.95854	0.0501667	0.451284	UDP-N-acetylglucosamine 2-epimerase (non-hydrolyzing)	WP_009902237.1
gene-UAB	UAB_RS0205945	3935.42	0.230834	0.117346	1.96712	0.0491694	0.451284	helicase-exonuclease AddAB subunit AddB	WP_009902245.1
gene-UAB	UAB_RS0208660	178.387	0.498229	0.254421	1.95828	0.0501966	0.451284	NAD(P)H-dependent oxidoreductase	WP_009902564.1
gene-UAB	UAB_RS0210765	1247.31	0.21892	0.111438	1.9645	0.0494726	0.451284	tyrosine-type recombinase/integrase	WP_003435347.1
gene-UAB	UAB_RS0211245	3928.49	0.22554	0.114833	1.96407	0.0495214	0.451284	ATP-dependent chaperone ClpB	WP_003435194.1
gene-UAB	UAB_RS0212005	16.1871	-1.143	0.583428	-1.95911	0.0501001	0.451284	hypothetical protein	WP_009897310.1
gene-UAB	UAB_RS0218275	14828.5	0.185026	0.0942981	1.96214	0.0497459	0.451284	DNA polymerase III subunit alpha	WP_003436251.1
gene-UAB	UAB_RS0218300	2472.09	0.226587	0.115535	1.9612	0.0498553	0.451284	PHP domain-containing protein	WP_003436256.1
gene-UAB	UAB_RS0218475	2653.96	0.167224	0.0854872	1.95612	0.0504507	0.452476	histidine phosphatase family protein	WP_003437763.1
gene-UAB	UAB_RS0201785	1.72254	-4.56635	2.33681	-1.9541	0.0506895	0.453525	0	WP_005927622.1
gene-UAB	UAB_RS0204845	47.1283	0.729072	0.373503	1.95199	0.0509399	0.454672	glycerol kinase GlpK	WP_009902132.1
gene-UAB	UAB_RS02000000221030	949.18	-0.23014	0.118115	-1.94843	0.0513634	0.457356	Lrp/AsnC family transcriptional regulator	WP_003429149.1
gene-UAB	UAB_RS0214045	147.543	-0.475418	0.244283	-1.94618	0.0516332	0.458418	PTS ascorbate transporter subunit IIC	WP_009890757.1
gene-UAB	UAB_RS0218675	23872.2	0.186695	0.0959685	1.94538	0.0517291	0.458418	F0F1 ATP synthase subunit A	WP_003437836.1
gene-UAB	UAB_RS0207485	164.119	-0.390708	0.201234	-1.94156	0.0521902	0.459615	polysaccharide deacetylase family protein	WP_003438319.1
gene-UAB	UAB_RS0209460	2051.03	-0.213815	0.110146	-1.9412	0.0522346	0.459615	aminomethyl-transferring glycine dehydrogenase subunit GcvPB	WP_009902689.1
gene-UAB	UAB_RS0210875	13078.2	-0.214006	0.110165	-1.94259	0.0520653	0.459615	coenzyme F420-0:L-glutamate ligase	WP_003424103.1
gene-UAB	UAB_RS02000000219845	145.621	-0.444972	0.229713	-1.93708	0.0527353	0.460122	minor capsid protein	WP_009901349.1
gene-UAB	UAB_RS0205935	1097.61	0.263844	0.136229	1.93677	0.052774	0.460122	ATP-dependent helicase	WP_003437942.1
gene-UAB	UAB_RS0211345	686.248	-0.278796	0.143873	-1.9378	0.052648	0.460122	MerR family transcriptional regulator	WP_009902960.1
gene-UAB	UAB_RS0216640	3650.58	-0.221321	0.114339	-1.93565	0.0529103	0.460122	PTS glucose transporter subunit IIA	WP_009903483.1
gene-UAB	UAB_RS0217980	28.9184	0.841717	0.434677	1.93642	0.0528165	0.460122	type II secretion system protein	WP_009891768.1
gene-UAB	UAB_RS0201600	960.645	0.207648	0.107748	1.92717	0.0539589	0.460552	0	WP_003434423.1
gene-UAB	UAB_RS0203490	4538.46	0.202166	0.104861	1.92794	0.0538621	0.460552	FtsX-like permease family protein	WP_009901931.1
gene-UAB	UAB_RS0206535	14813.2	-0.199396	0.103293	-1.93038	0.0535593	0.460552	phosphate acyltransferase PlsX	WP_003428446.1
gene-UAB	UAB_RS0207950	3299.96	-0.171394	0.0889783	-1.92625	0.0540734	0.460552	ABC-F family ATP-binding cassette domain-containing protein	WP_021359140.1
gene-UAB	UAB_RS0211890	645.842	0.367579	0.190346	1.93111	0.0534695	0.460552	D-alanyl-D-alanine carboxypeptidase	WP_009903037.1
gene-UAB	UAB_RS0214580	6399.43	-0.18695	0.0967653	-1.93199	0.0533602	0.460552	stage V sporulation protein E	WP_003426995.1
gene-UAB	UAB_RS0214925	3559.04	0.196992	0.102186	1.92777	0.0538834	0.460552	delta-lactam-biosynthetic de-N-acetylase	WP_009897898.1
gene-UAB	UAB_RS0217500	19188.1	0.193995	0.100507	1.93016	0.0535869	0.460552	4-hydroxy-tetrahydrodipicolinate synthase	WP_003422063.1
gene-UAB	UAB_RS0218715	2819.41	-0.221315	0.114592	-1.93133	0.0534425	0.460552	threonylcarbamoyl-AMP synthase	WP_009892045.1
gene-UAB	UAB_RS0206715	244.046	-0.37216	0.193405	-1.92426	0.0543223	0.461311	sporulation transcription factor Spo0A	WP_003424711.1
gene-UAB	UAB_RS0212550	8026.81	-0.314382	0.163522	-1.92257	0.0545344	0.461311	1-phosphofructokinase	WP_003440256.1
gene-UAB	UAB_RS0218435	1067.76	0.263792	0.137153	1.92334	0.0544375	0.461311	cobalt-precorrin-7 (C(5))-methyltransferase	WP_009903759.1
gene-UAB	UAB_RS0211420	5739.39	-0.181067	0.0943287	-1.91953	0.0549174	0.463498	diaminopimelate decarboxylase	WP_009902969.1
gene-UAB	UAB_RS0205160	47.8608	-0.749454	0.391339	-1.9151	0.0554797	0.467184	acyl-CoA dehydrogenase family protein	WP_003437554.1
gene-UAB	UAB_RS0211735	1562.08	0.204387	0.107078	1.90878	0.0562906	0.472438	copper-translocating P-type ATPase	WP_009903015.1
gene-UAB	UAB_RS0215870	261.84	0.344419	0.180488	1.90826	0.0563575	0.472438	hypothetical protein	WP_009893748.1
gene-UAB	UAB_RS0215135	4485.16	0.179368	0.0941152	1.90584	0.056671	0.473999	N-acetylmuramoyl-L-alanine amidase	WP_004454121.1
gene-UAB	UAB_RS0201065	100112	-0.163228	0.0862808	-1.89182	0.0585147	0.475	0	WP_003421188.1
gene-UAB	UAB_RS0205300	4491.28	0.337441	0.178683	1.88849	0.0589603	0.475	aconitate hydratase	WP_004454235.1
gene-UAB	UAB_RS0206020	22560.8	0.2608	0.137115	1.90205	0.0571642	0.475	electron transfer flavoprotein subunit beta/FixA family protein	WP_009888867.1
gene-UAB	UAB_RS0206530	12101.7	-0.169916	0.0893995	-1.90064	0.0573494	0.475	transcription factor FapR	WP_003419115.1
gene-UAB	UAB_RS0207540	2667.19	-0.219631	0.115372	-1.90367	0.0569527	0.475	diguanylate cyclase	WP_003438341.1
gene-UAB	UAB_RS0209295	51.9732	-0.606711	0.321239	-1.88866	0.0589378	0.475	D-alanine--D-serine ligase VanG	WP_009902668.1
gene-UAB	UAB_RS0209770	1796.33	-0.246739	0.129974	-1.89838	0.0576463	0.475	CoA-binding protein	WP_004454444.1
gene-UAB	UAB_RS0209870	301.401	0.408798	0.215729	1.89496	0.0580972	0.475	hypothetical protein	WP_003430208.1
gene-UAB	UAB_RS0210555	888.587	-0.218073	0.114848	-1.89881	0.0575898	0.475	class I SAM-dependent methyltransferase	WP_009902822.1
gene-UAB	UAB_RS0210625	90.5181	-0.482778	0.255326	-1.89083	0.0586469	0.475	iron-containing alcohol dehydrogenase	WP_009902831.1
gene-UAB	UAB_RS0211260	316.669	0.36994	0.195117	1.89599	0.057961	0.475	GntR family transcriptional regulator	WP_003424232.1
gene-UAB	UAB_RS0212250	4986.41	0.199708	0.105291	1.89672	0.0578643	0.475	ABC transporter ATP-binding protein	WP_003433862.1
gene-UAB	UAB_RS0212580	430.971	-0.295175	0.155275	-1.90098	0.0573048	0.475	sodium:alanine symporter family protein	WP_009903125.1
gene-UAB	UAB_RS0215165	35765.5	0.204399	0.107815	1.89584	0.0579816	0.475	cell wall-binding glycosyl-hydrolase Cwp19	WP_009897928.1
gene-UAB	UAB_RS0217570	15834.3	0.598384	0.31681	1.88878	0.0589219	0.475	proline racemase	WP_003422090.1
gene-UAB	UAB_RS0218265	31860.4	0.197963	0.104794	1.88908	0.0588817	0.475	pyruvate kinase	WP_009903738.1
gene-UAB	UAB_RS0219230	1095.1	-0.240787	0.127357	-1.89065	0.0586707	0.475	class I SAM-dependent methyltransferase	WP_003434910.1
gene-UAB	UAB_RS0203240	3.57979	-2.52276	1.33807	-1.88537	0.0593801	0.475771	conjugal transfer protein	WP_025992015.1
gene-UAB	UAB_RS0209055	9928.7	0.160395	0.0850799	1.88523	0.0593993	0.475771	phospho-sugar mutase	WP_009902629.1
gene-UAB	UAB_RS0217175	10147.5	0.262415	0.139217	1.88493	0.0594394	0.475771	triose-phosphate isomerase	WP_003434148.1
gene-UAB	UAB_RS0200785	364.373	-0.327289	0.174	-1.88097	0.0599755	0.478824	0	0
gene-UAB	UAB_RS0202990	2306.97	0.178908	0.0952581	1.87814	0.0603623	0.478824	0	WP_003434832.1
gene-UAB	UAB_RS0208435	2352.55	-0.189355	0.100795	-1.87861	0.0602981	0.478824	deoxyribose-phosphate aldolase	WP_003439345.1
gene-UAB	UAB_RS0210235	1587.23	-0.179227	0.0954043	-1.8786	0.0602987	0.478824	FAD-dependent oxidoreductase	WP_003439500.1
gene-UAB	UAB_RS0214100	46373.6	-0.222925	0.118742	-1.87739	0.0604641	0.478824	50S ribosomal protein L28	WP_003416297.1
gene-UAB	UAB_RS0201605	1383.47	0.233459	0.124428	1.87625	0.0606204	0.479043	0	WP_009895221.1
gene-UAB	UAB_RS0202775	241.489	0.326051	0.17427	1.87095	0.0613514	0.483792	0	WP_009895371.1
gene-UAB	UAB_RS0208340	1267.43	-0.215834	0.115571	-1.86755	0.0618249	0.485469	AIM24 family protein	WP_003434127.1
gene-UAB	UAB_RS0218320	3897.4	0.168604	0.0902445	1.8683	0.0617207	0.485469	NAD(P)H-dependent oxidoreductase subunit E	WP_003416946.1
gene-UAB	UAB_RS0205295	1721.15	0.344743	0.185178	1.86169	0.0626468	0.488187	homocitrate synthase	WP_003418528.1
gene-UAB	UAB_RS0207990	1003.95	-0.251464	0.135098	-1.86134	0.0626957	0.488187	EamA family transporter	WP_009902492.1
gene-UAB	UAB_RS0210105	1655.53	-0.238464	0.128073	-1.86194	0.0626114	0.488187	monooxygenase	WP_003430265.1
gene-UAB	UAB_RS0217610	3423.3	0.178289	0.0956791	1.86341	0.0624052	0.488187	sigma-54 dependent transcriptional regulator PrdR	WP_003428097.1
gene-UAB	UAB_RS0214220	524.143	-0.309763	0.166719	-1.85799	0.0631708	0.49086	peptide deformylase	WP_003431159.1
gene-UAB	UAB_RS0212390	405.723	0.247733	0.133693	1.853	0.0638819	0.492274	ROK family protein	WP_009903099.1
gene-UAB	UAB_RS0214665	8923.88	-0.178241	0.096149	-1.8538	0.0637683	0.492274	dipeptide ABC transporter ATP-binding protein	WP_003427052.1
gene-UAB	UAB_RS0215580	760.502	0.248652	0.134185	1.85306	0.0638742	0.492274	polymer-forming cytoskeletal protein	WP_009898014.1
gene-UAB	UAB_RS0216445	301.898	0.28855	0.155538	1.85518	0.0635708	0.492274	MurR/RpiR family transcriptional regulator	WP_003427244.1
gene-UAB	UAB_RS0214515	1155.05	0.212643	0.114815	1.85205	0.0640192	0.492313	peptidoglycan editing factor PgeF	WP_011861621.1
gene-UAB	UAB_RS0208220	939.927	-0.19429	0.105073	-1.84909	0.0644441	0.493541	NAD(P)H-dependent oxidoreductase	WP_009902514.1
gene-UAB	UAB_RS0208315	2120.47	-0.185058	0.100068	-1.84932	0.0644116	0.493541	EAL domain-containing protein	WP_009902525.1
gene-UAB	UAB_RS0208580	3701.55	-0.167376	0.0907609	-1.84414	0.0651623	0.498016	ABC transporter ATP-binding protein	WP_003429754.1
gene-UAB	UAB_RS02000000219975	5349.69	-0.182199	0.0990888	-1.83874	0.0659528	0.501997	0	WP_003429494.1
gene-UAB	UAB_RS0210385	23772.4	0.234561	0.127535	1.83919	0.0658878	0.501997	cation-translocating P-type ATPase	WP_009902789.1
gene-UAB	UAB_RS0206520	26629.5	-0.195073	0.106297	-1.83518	0.0664794	0.503944	DUF177 domain-containing protein	WP_003419111.1
gene-UAB	UAB_RS0216195	167.633	0.416634	0.227023	1.83521	0.0664749	0.503944	thioredoxin	WP_004453775.1
gene-UAB	UAB_RS0213340	171.403	-0.402659	0.219528	-1.8342	0.0666237	0.504011	AraC family transcriptional regulator	WP_009903190.1
gene-UAB	UAB_RS0203205	3.69076	-2.30454	1.25754	-1.83258	0.0668648	0.504809	0	WP_009901833.1
gene-UAB	UAB_RS0207335	15528.1	-0.153747	0.0840786	-1.82861	0.0674581	0.508258	ribonuclease J	WP_011861169.1
gene-UAB	UAB_RS0200990	2704.08	0.196534	0.107533	1.82767	0.0675991	0.50829	0	WP_003425513.1
gene-UAB	UAB_RS0203790	429.284	-0.27656	0.151747	-1.82251	0.0683769	0.51207	chemotaxis protein CheB	WP_009895569.1
gene-UAB	RS2000000221770	19.298	-0.989133	0.542558	-1.82309	0.0682896	0.51207	#N/A	#N/A
gene-UAB	UAB_RS0202995	615.244	-0.233094	0.128343	-1.81617	0.069344	0.517301	0	WP_003417301.1
gene-UAB	UAB_RS0214670	7911.37	-0.18672	0.102827	-1.81587	0.069391	0.517301	ABC transporter ATP-binding protein	WP_009897854.1
gene-UAB	UAB_RS0216795	45.7823	0.650139	0.358163	1.81521	0.0694923	0.517301	FtsX-like permease family protein	WP_003433803.1
gene-UAB	UAB_RS0216490	112.166	0.463914	0.256027	1.81197	0.0699903	0.519968	MurR/RpiR family transcriptional regulator	WP_009891411.1
gene-UAB	UAB_RS0204025	25.734	0.838784	0.463902	1.8081	0.0705902	0.523214	hypothetical protein	WP_003438934.1
gene-UAB	UAB_RS0206225	387.939	0.334849	0.185363	1.80644	0.070849	0.523214	glycyl-radical enzyme activating protein	WP_009902269.1
gene-UAB	UAB_RS0218120	412.32	0.251417	0.139158	1.8067	0.0708091	0.523214	DUF3786 domain-containing protein	WP_009903713.1
gene-UAB	UAB_RS02000000220335	10.6208	1.42812	0.792045	1.80308	0.0713754	0.525228	sigma-70 family RNA polymerase sigma factor	WP_003438191.1
gene-UAB	UAB_RS0202740	119.053	0.416526	0.231031	1.8029	0.0714039	0.525228	0	WP_003435932.1
gene-UAB	UAB_RS0204030	25.1813	0.889895	0.496559	1.79212	0.0731133	0.529749	hypothetical protein	WP_003429630.1
gene-UAB	UAB_RS0205950	5400.39	0.229133	0.127967	1.79057	0.0733627	0.529749	helicase-exonuclease AddAB subunit AddA	WP_009902247.1
gene-UAB	UAB_RS0207170	1695.59	-0.225845	0.125693	-1.7968	0.0723672	0.529749	tRNA (guanosine(37)-N1)-methyltransferase TrmD	WP_003438222.1
gene-UAB	UAB_RS0209730	5.9319	1.92844	1.07693	1.79068	0.0733441	0.529749	sulfur carrier protein ThiS	WP_003430174.1
gene-UAB	UAB_RS0209760	4625.31	-0.178548	0.0997432	-1.79007	0.0734419	0.529749	GTP pyrophosphokinase	WP_004454447.1
gene-UAB	UAB_RS0210420	675	-0.245538	0.136952	-1.79287	0.0729929	0.529749	CorA family divalent cation transporter	WP_003428624.1
gene-UAB	UAB_RS0210815	663.632	-0.263328	0.146904	-1.79252	0.0730493	0.529749	hypothetical protein	WP_003435330.1
gene-UAB	UAB_RS0214560	1282.21	0.222972	0.124552	1.79019	0.0734234	0.529749	DUF881 domain-containing protein	WP_009897825.1
gene-UAB	UAB_RS0217180	15428.7	0.228243	0.127484	1.79036	0.0733962	0.529749	phosphoglycerate kinase	WP_003429565.1
gene-UAB	UAB_RS0219160	17579.3	-0.197492	0.109861	-1.79766	0.0722316	0.529749	Veg family protein	WP_009892135.1
gene-UAB	UAB_RS0203575	1058.92	-0.22522	0.125956	-1.78808	0.0737624	0.531032	HAMP domain-containing histidine kinase	WP_009901956.1
gene-UAB	UAB_RS0216395	1032.95	0.194264	0.108829	1.78504	0.0742543	0.53149	DUF262 domain-containing protein	WP_003439939.1
gene-UAB	UAB_RS0218950	177.241	0.359059	0.201017	1.78621	0.0740647	0.53149	putative 2-aminoethylphosphonate ABC transporter substrate-binding protein	WP_009892094.1
gene-UAB	UAB_RS0219655	8183.2	0.170008	0.0952404	1.78504	0.0742543	0.53149	YybS family protein	WP_003434254.1
gene-UAB	UAB_RS0215615	15575.6	0.206334	0.11583	1.78136	0.0748544	0.534756	D-alanyl-lipoteichoic acid biosynthesis protein DltD	WP_003439587.1
gene-UAB	UAB_RS0206435	2778.34	0.217288	0.122293	1.77679	0.075603	0.53907	DUF2344 domain-containing protein	WP_003438070.1
gene-UAB	UAB_RS0205695	6.65654	-1.57655	0.887965	-1.77546	0.0758215	0.539594	3-isopropylmalate dehydratase small subunit	WP_003437092.1
gene-UAB	UAB_RS0201270	11700.7	-0.292045	0.164805	-1.77206	0.0763839	0.540496	0	WP_003421117.1
gene-UAB	UAB_RS0202210	9.78295	-1.44095	0.812459	-1.77356	0.0761354	0.540496	0	WP_009901715.1
gene-UAB	UAB_RS0208490	28.218	-0.827457	0.466933	-1.77211	0.076376	0.540496	hypothetical protein	WP_003439365.1
gene-UAB	UAB_RS0211265	922.365	0.212329	0.119911	1.77072	0.0766075	0.540949	ABC transporter ATP-binding protein	WP_003435188.1
gene-UAB	UAB_RS0215505	39.335	0.701119	0.396174	1.76973	0.0767727	0.540949	hypothetical protein	WP_009898002.1
gene-UAB	UAB_RS0218040	67333.7	0.16109	0.0910596	1.76906	0.0768839	0.540949	trigger factor	WP_003417090.1
gene-UAB	UAB_RS0206260	1808.01	0.218229	0.123669	1.76463	0.0776266	0.544289	AraC family transcriptional regulator	WP_003438032.1
gene-UAB	UAB_RS0209075	48.4555	-0.879712	0.498567	-1.76448	0.0776511	0.544289	exosporium morphogenetic protein CdeM	WP_003436550.1
gene-UAB	UAB_RS0209210	32.904	-0.696396	0.395103	-1.76257	0.0779731	0.545518	GyrI-like domain-containing protein	WP_009889503.1
gene-UAB	RS2000000221155	205455	-0.2583	0.14667	-1.76109	0.0782226	0.546237	#N/A	#N/A
gene-UAB	UAB_RS0202445	1146.88	0.28121	0.15982	1.75954	0.0784858	0.546727	0	WP_009895326.1
gene-UAB	UAB_RS0203640	536.109	0.259294	0.147487	1.75808	0.0787334	0.546727	Fic family protein	WP_009901967.1
gene-UAB	UAB_RS0219060	1084.84	0.223529	0.127116	1.75847	0.078667	0.546727	thymidylate kinase	WP_009892113.1
gene-UAB	UAB_RS0203360	1625.38	0.21156	0.12053	1.75526	0.0792155	0.549051	0	WP_009901895.1
gene-UAB	UAB_RS0207015	32.8175	-0.709933	0.405239	-1.75189	0.079793	0.551001	DUF4177 domain-containing protein	WP_003434344.1
gene-UAB	UAB_RS0208850	50.4223	-0.594358	0.339117	-1.75266	0.0796598	0.551001	helix-turn-helix transcriptional regulator	WP_009902588.1
gene-UAB	UAB_RS0214425	1680.29	0.240252	0.137223	1.75081	0.0799779	0.551255	PTS sugar transporter subunit IIC	WP_003416156.1
gene-UAB	UAB_RS0205625	16198.7	0.21943	0.125496	1.7485	0.0803774	0.552909	ABC transporter ATP-binding protein	WP_009895930.1
gene-UAB	UAB_RS0208725	6048.22	-0.18643	0.106672	-1.74771	0.0805149	0.552909	amino acid permease	WP_009896511.1
gene-UAB	UAB_RS0217165	70513	0.157825	0.0903497	1.74682	0.0806685	0.552943	phosphopyruvate hydratase	WP_009898301.1
gene-UAB	UAB_RS0208300	1181.93	0.180899	0.103615	1.74588	0.0808319	0.553045	ABC transporter ATP-binding protein	WP_009902523.1
gene-UAB	UAB_RS0218030	50035.9	0.174131	0.0998577	1.7438	0.0811947	0.554508	ATP-dependent Clp protease ATP-binding subunit ClpX	WP_003417105.1
gene-UAB	UAB_RS0205510	38.2196	-0.812619	0.468227	-1.73552	0.0826479	0.558914	ABC transporter	WP_009902204.1
gene-UAB	UAB_RS0209440	9424.28	-0.180076	0.10379	-1.735	0.0827409	0.558914	Na+/H+ antiporter NhaC family protein	WP_009889552.1
gene-UAB	UAB_RS0211220	123.731	-0.414197	0.238669	-1.73544	0.0826622	0.558914	hypothetical protein	WP_003435199.1
gene-UAB	UAB_RS0215260	1711.93	0.230997	0.132968	1.73724	0.0823447	0.558914	cell wall-binding protein Cwp5	WP_009897945.1
gene-UAB	UAB_RS0218020	3704.1	0.159652	0.0919846	1.73564	0.0826273	0.558914	chromate transporter	WP_003417110.1
gene-UAB	UAB_RS0218850	308.845	0.285913	0.164463	1.73846	0.0821291	0.558914	prepilin-type N-terminal cleavage/methylation domain-containing protein	WP_021402879.1
gene-UAB	UAB_RS0204425	15.5856	-1.13629	0.655484	-1.73351	0.0830047	0.559681	ABC transporter permease	WP_003439186.1
gene-UAB	UAB_RS0209880	1120.07	0.221335	0.127814	1.73169	0.0833283	0.560846	GNAT family N-acetyltransferase	WP_004454420.1
gene-UAB	UAB_RS0203660	7219.6	0.147098	0.0852835	1.72481	0.0845612	0.56333	0	WP_009901974.1
gene-UAB	UAB_RS0206125	424.22	0.30441	0.17633	1.72637	0.0842809	0.56333	GntR family transcriptional regulator	WP_009896033.1
gene-UAB	UAB_RS0208140	684.186	-0.258995	0.150399	-1.72206	0.0850595	0.56333	hypothetical protein	WP_003438621.1
gene-UAB	UAB_RS0208280	42732.8	0.182521	0.105821	1.7248	0.0845638	0.56333	cell wall-binding protein Cwp20	WP_009902521.1
gene-UAB	UAB_RS0209405	7.41129	1.68731	0.979353	1.72288	0.0849095	0.56333	iron chelate uptake ABC transporter family permease subunit	WP_009902684.1
gene-UAB	UAB_RS0211350	908.637	-0.219096	0.127224	-1.72213	0.0850458	0.56333	helix-turn-helix transcriptional regulator	WP_009902962.1
gene-UAB	UAB_RS0217015	920.792	0.237988	0.137689	1.72845	0.0839083	0.56333	hypothetical protein	WP_009903561.1
gene-UAB	UAB_RS0218035	12791.9	0.205036	0.118953	1.72367	0.084768	0.56333	ATP-dependent Clp endopeptidase proteolytic subunit ClpP	WP_003417102.1
gene-UAB	UAB_RS0219765	9270.17	-0.198805	0.115062	-1.7278	0.0840241	0.56333	50S ribosomal protein L34	WP_003420485.1
gene-UAB	UAB_RS0219495	94.3551	-0.436727	0.254481	-1.71615	0.0861354	0.569442	CPBP family intramembrane metalloprotease	WP_003435750.1
gene-UAB	UAB_RS0204765	3814.17	-0.22481	0.131138	-1.7143	0.0864738	0.570665	acetyl-CoA decarbonylase/synthase complex subunit delta	WP_003432254.1
gene-UAB	UAB_RS0213055	1678.45	-0.273528	0.159648	-1.71332	0.0866534	0.570839	hypothetical protein	WP_009897547.1
gene-UAB	UAB_RS0200420	380.762	-0.325814	0.190462	-1.71065	0.0871457	0.572629	tape measure protein	WP_009901478.1
gene-UAB	UAB_RS0205630	20883.6	0.22928	0.13411	1.70964	0.0873317	0.572629	ABC transporter permease subunit	WP_009895932.1
gene-UAB	UAB_RS0215995	603.253	0.23245	0.135987	1.70935	0.0873866	0.572629	hypothetical protein	WP_009903387.1
gene-UAB	UAB_RS0206045	1429.95	-0.195599	0.114591	-1.70693	0.087836	0.573522	RluA family pseudouridine synthase	WP_009902251.1
gene-UAB	UAB_RS0207970	4453.79	-0.145314	0.0851136	-1.70729	0.0877684	0.573522	competence/damage-inducible protein A	WP_003438532.1
gene-UAB	UAB_RS0214590	6739.81	-0.147759	0.0866296	-1.70564	0.0880759	0.573522	phospho-N-acetylmuramoyl-pentapeptide-transferase	WP_003427000.1
gene-UAB	UAB_RS0215105	50404	0.151643	0.0889247	1.7053	0.0881393	0.573522	phosphoenolpyruvate--protein phosphotransferase	WP_009897922.1
gene-UAB	UAB_RS0200865	796.964	0.271035	0.159376	1.7006	0.0890187	0.573574	0	WP_003425587.1
gene-UAB	UAB_RS0209775	4558.85	-0.183564	0.107908	-1.70111	0.088922	0.573574	heavy metal-binding domain-containing protein	WP_003420397.1
gene-UAB	UAB_RS0211205	351.7	-0.263314	0.154832	-1.70065	0.0890089	0.573574	dihydroxy-acid dehydratase	WP_009902938.1
gene-UAB	UAB_RS0212235	1371.42	-0.183689	0.107838	-1.70338	0.0884976	0.573574	flavodoxin	WP_009897366.1
gene-UAB	UAB_RS0212255	5645.74	0.193617	0.113871	1.70031	0.089072	0.573574	ABC transporter ATP-binding protein	WP_003433859.1
gene-UAB	UAB_RS0213270	3842.35	0.176198	0.103595	1.70084	0.0889737	0.573574	MarR family transcriptional regulator	WP_004454702.1
gene-UAB	UAB_RS0202285	5.6287	-1.66899	0.982732	-1.69832	0.0894483	0.575002	0	WP_003435038.1
gene-UAB	UAB_RS0219465	108.565	-0.422896	0.249241	-1.69674	0.089746	0.575922	ketohydroxyglutarate aldolase	WP_009898812.1
gene-UAB	UAB_RS0200645	9269.85	-0.176476	0.104092	-1.69538	0.0900028	0.576575	hypothetical protein	WP_009894741.1
gene-UAB	UAB_RS0210755	2096.08	-0.187688	0.110995	-1.69096	0.0908446	0.580968	MBL fold metallo-hydrolase	WP_003435380.1
gene-UAB	UAB_RS02000000220180	291.555	-0.291485	0.172596	-1.68883	0.0912528	0.582369	0	WP_009895551.1
gene-UAB	UAB_RS0211000	2309.59	0.165254	0.097889	1.68818	0.0913766	0.582369	ABC transporter ATP-binding protein	WP_003435263.1
gene-UAB	UAB_RS0202180	1.25825	3.85693	2.29673	1.67931	0.0930916	0.592285	0	WP_009901709.1
gene-UAB	UAB_RS0219375	5240.16	-0.168567	0.10045	-1.67813	0.0933225	0.592741	SufD family Fe-S cluster assembly protein	WP_003435793.1
gene-UAB	UAB_RS0209305	397.925	-0.235065	0.140216	-1.67645	0.0936493	0.593804	serine racemase VanT catalytic subunit	WP_009902670.1
gene-UAB	UAB_RS0213970	1530.51	0.209455	0.125024	1.67531	0.0938728	0.594083	5'-nucleotidase C-terminal domain-containing protein	WP_009903241.1
gene-UAB	RS2000000221660	28.2314	-0.709614	0.423751	-1.6746	0.0940125	0.594083	#N/A	#N/A
gene-UAB	UAB_RS0210330	457.61	-0.218665	0.130684	-1.67323	0.0942811	0.59477	LytTR family transcriptional regulator	WP_009889774.1
gene-UAB	UAB_RS0205315	1506.39	0.188976	0.113335	1.66741	0.0954335	0.597986	GNAT family N-acetyltransferase	WP_004454230.1
gene-UAB	UAB_RS0208530	80.0267	-0.445346	0.267049	-1.66766	0.095383	0.597986	ferrous iron transport protein A	WP_003420037.1
gene-UAB	UAB_RS0211855	4115.26	-0.154013	0.0922367	-1.66976	0.0949676	0.597986	phosphatidate cytidylyltransferase	WP_003434000.1
gene-UAB	UAB_RS0214835	301.425	-0.289315	0.173417	-1.66832	0.0952513	0.597986	pentapeptide repeat-containing protein	WP_009897880.1
gene-UAB	UAB_RS0202490	367.363	0.267554	0.160702	1.66491	0.0959317	0.600097	0	WP_009901742.1
gene-UAB	UAB_RS0214690	2380.93	0.184991	0.11128	1.66239	0.0964343	0.601881	LysR family transcriptional regulator	WP_004454990.1
gene-UAB	UAB_RS0215610	15766.9	0.205495	0.123653	1.66186	0.0965402	0.601881	D-alanine--poly(phosphoribitol) ligase	WP_009898020.1
gene-UAB	UAB_RS0211510	401.849	-0.222911	0.134369	-1.65894	0.0971274	0.60352	putative selenium-dependent hydroxylase accessory protein YqeC	WP_009902981.1
gene-UAB	UAB_RS0218870	1825.09	0.177249	0.106825	1.65925	0.0970653	0.60352	type II/IV secretion system protein	WP_009898724.1
gene-UAB	UAB_RS0205080	470.863	-0.235277	0.142198	-1.65458	0.0980098	0.604196	cysteine-rich small domain-containing protein	WP_003437519.1
gene-UAB	UAB_RS0205435	53.0874	-0.521639	0.315047	-1.65575	0.0977723	0.604196	hypothetical protein	WP_004453592.1
gene-UAB	UAB_RS0211290	7507.22	-0.152493	0.0921249	-1.65528	0.0978674	0.604196	DUF4878 domain-containing protein	WP_009902950.1
gene-UAB	UAB_RS0212930	4011.8	-0.230388	0.139258	-1.65439	0.0980479	0.604196	hypothetical protein	WP_003430736.1
gene-UAB	UAB_RS0219095	11924.3	-0.170603	0.102953	-1.6571	0.0974993	0.604196	type III pantothenate kinase	WP_003425980.1
gene-UAB	UAB_RS0204165	581.243	0.271594	0.164532	1.65071	0.0987978	0.606808	MerR family transcriptional regulator	WP_009895633.1
gene-UAB	RS2000000221565	19087.8	0.42488	0.257357	1.65094	0.0987518	0.606808	#N/A	#N/A
gene-UAB	UAB_RS0209885	670.062	0.202035	0.12259	1.64806	0.0993412	0.60914	cobalamin-dependent protein	WP_004454419.1
gene-UAB	UAB_RS0213775	2248.7	0.181927	0.110488	1.64657	0.0996458	0.610003	histidinol-phosphate aminotransferase family protein	WP_009903219.1
gene-UAB	UAB_RS0211525	49.9957	-0.531542	0.323052	-1.64538	0.0998923	0.610507	FAD binding domain-containing protein	WP_009902983.1
gene-UAB	UAB_RS0200240	9.82154	1.53203	0.932909	1.64221	0.100548	0.613505	DUF2634 domain-containing protein	WP_009901353.1
gene-UAB	UAB_RS0200735	1472.67	0.184091	0.112479	1.63666	0.101701	0.615705	0	WP_003435561.1
gene-UAB	UAB_RS0200995	114153	0.282958	0.172737	1.63808	0.101404	0.615705	0	WP_009895180.1
gene-UAB	UAB_RS0203755	524.307	0.276971	0.169038	1.63851	0.101315	0.615705	0	WP_003425085.1
gene-UAB	UAB_RS0206400	6055.56	-0.133367	0.0815384	-1.63563	0.101917	0.615705	rod shape-determining protein RodA	WP_009888916.1
gene-UAB	UAB_RS0210190	12.6758	-1.1467	0.701316	-1.63507	0.102035	0.615705	DUF4363 family protein	WP_003439516.1
gene-UAB	UAB_RS0210990	6547.62	0.196435	0.120087	1.63577	0.101887	0.615705	DNA mismatch repair endonuclease MutL	WP_009902879.1
gene-UAB	UAB_RS0214760	1319.55	-0.184501	0.112897	-1.63424	0.102209	0.615705	alpha/beta-type small acid-soluble spore protein	WP_003416009.1
gene-UAB	UAB_RS0215690	941.224	0.205122	0.125524	1.63413	0.102231	0.615705	sigma 54-interacting transcriptional regulator	WP_021368764.1
gene-UAB	UAB_RS0212150	155.151	-0.328704	0.201439	-1.63178	0.102727	0.61589	histidinol-phosphatase HisJ family protein	WP_009897350.1
gene-UAB	UAB_RS0215605	14215.7	0.175906	0.10781	1.63162	0.102759	0.61589	D-alanyl-lipoteichoic acid biosynthesis protein DltB	WP_009898018.1
gene-UAB	UAB_RS0218505	2545.63	0.171636	0.10518	1.63184	0.102714	0.61589	aldose 1-epimerase family protein	WP_009903770.1
gene-UAB	UAB_RS0213135	4866.82	-0.171335	0.105129	-1.62976	0.103153	0.617259	butyrate kinase	WP_004454677.1
gene-UAB	UAB_RS0213545	564.608	-0.259416	0.159319	-1.62828	0.103466	0.618139	helix-turn-helix domain-containing protein	WP_009903207.1
gene-UAB	UAB_RS0205125	2510.48	0.189515	0.116503	1.62669	0.103803	0.619157	substrate-binding domain-containing protein	WP_003437541.1
gene-UAB	UAB_RS0206505	1269.47	0.183129	0.112719	1.62465	0.104238	0.61997	FAD-binding oxidoreductase	WP_009902289.1
gene-UAB	UAB_RS0213205	1945.99	-0.219509	0.135125	-1.62449	0.104272	0.61997	B3/4 domain-containing protein	WP_004454689.1
gene-UAB	UAB_RS0201525	76.1033	-0.448518	0.2772	-1.61803	0.105655	0.622278	0	WP_003420747.1
gene-UAB	UAB_RS0202345	2726.49	0.193207	0.119243	1.62027	0.105174	0.622278	0	WP_003425288.1
gene-UAB	UAB_RS0202505	569.432	0.268254	0.165933	1.61665	0.105955	0.622278	0	WP_003425244.1
gene-UAB	UAB_RS0206500	1045.72	0.195029	0.120261	1.62171	0.104865	0.622278	FAD-binding protein	WP_003438092.1
gene-UAB	UAB_RS0206970	10189.6	-0.213058	0.131806	-1.61645	0.105998	0.622278	TetR/AcrR family transcriptional regulator	WP_009902354.1
gene-UAB	UAB_RS0211945	5516.69	0.186924	0.115618	1.61673	0.105937	0.622278	M42 family metallopeptidase	WP_003433978.1
gene-UAB	UAB_RS0214715	144.126	-0.375247	0.231996	-1.61747	0.105777	0.622278	GntP family permease	WP_004454996.1
gene-UAB	UAB_RS0219025	7353.46	-0.156647	0.096727	-1.61948	0.105344	0.622278	nicotinate phosphoribosyltransferase	WP_003427657.1
gene-UAB	UAB_RS0202845	309.105	0.257876	0.159715	1.6146	0.106398	0.622403	0	WP_003437587.1
gene-UAB	UAB_RS0217585	6304.95	0.480908	0.297781	1.61497	0.106317	0.622403	proline reductase cluster protein PrdD	WP_009903671.1
gene-UAB	UAB_RS0218865	912.95	0.222361	0.137767	1.61403	0.106521	0.622403	type II secretion system F family protein	WP_009892080.1
gene-UAB	UAB_RS0213700	288.106	0.287089	0.17811	1.61187	0.106991	0.623193	PTS fructose transporter subunit IIB	WP_003416512.1
gene-UAB	RS2000000221930	1104.92	-0.234808	0.145634	-1.61232	0.106893	0.623193	#N/A	#N/A
gene-UAB	UAB_RS0209185	103.044	0.39974	0.24839	1.60932	0.107546	0.623496	hydroxyethylthiazole kinase	WP_009902648.1
gene-UAB	UAB_RS0210840	626.514	0.218506	0.135744	1.6097	0.107464	0.623496	helix-turn-helix transcriptional regulator	WP_009902854.1
gene-UAB	UAB_RS0210940	133.253	-0.386283	0.239852	-1.6105	0.107288	0.623496	acyl-CoA thioesterase/BAAT N-terminal domain-containing protein	WP_009902867.1
gene-UAB	UAB_RS0213050	6722.15	-0.146795	0.0912811	-1.60817	0.107799	0.623991	ABC transporter permease	WP_003430774.1
gene-UAB	UAB_RS0217790	16.5318	-0.895697	0.557259	-1.60733	0.107983	0.624089	ORF6N domain-containing protein	WP_009894678.1
gene-UAB	UAB_RS0200915	52.0616	0.574741	0.358185	1.60459	0.108584	0.625617	0	WP_009901553.1
gene-UAB	UAB_RS0214595	4507.69	-0.161925	0.100868	-1.60531	0.108425	0.625617	UDP-N-acetylmuramoyl-tripeptide--D-alanyl-D-alanine ligase	WP_009897829.1
gene-UAB	UAB_RS0214905	11339.1	0.154008	0.0960521	1.60338	0.10885	0.626184	hypothetical protein	WP_009897893.1
gene-UAB	UAB_RS0214705	6.87218	-1.82791	1.14058	-1.60262	0.109019	0.626189	3-oxoacid CoA-transferase subunit B	WP_009897858.1
gene-UAB	UAB_RS0210695	17.6123	0.900917	0.56296	1.60032	0.109527	0.628137	TIGR02536 family ethanolamine utilization protein	WP_009902847.1
gene-UAB	UAB_RS0200740	1867.53	0.200038	0.125139	1.59853	0.109925	0.628526	0	WP_003426056.1
gene-UAB	UAB_RS0209100	87.5812	0.491739	0.307627	1.59849	0.109933	0.628526	N-acetylglucosamine kinase	WP_003436540.1
gene-UAB	UAB_RS0203305	170.892	0.309618	0.194108	1.59508	0.110695	0.62998	0	WP_009901880.1
gene-UAB	UAB_RS0212290	1312.2	-0.186414	0.116824	-1.59568	0.11056	0.62998	type I 3-dehydroquinate dehydratase	WP_009897376.1
gene-UAB	UAB_RS0215915	1319.22	0.19974	0.1252	1.59537	0.110629	0.62998	type I-B CRISPR-associated endonuclease Cas1	WP_003439781.1
gene-UAB	UAB_RS0207330	1205.61	-0.208958	0.131115	-1.5937	0.111003	0.630769	metal-dependent hydrolase	WP_003428273.1
gene-UAB	UAB_RS0203120	296273	0.175493	0.110302	1.59103	0.111604	0.633216	0	WP_003427760.1
gene-UAB	UAB_RS0204300	368.467	0.25512	0.16157	1.57901	0.114335	0.633771	response regulator transcription factor	WP_009902053.1
gene-UAB	UAB_RS0207885	1948.34	-0.244908	0.155305	-1.57694	0.114808	0.633771	DMT family transporter	WP_003419730.1
gene-UAB	UAB_RS0207920	3424.19	0.180501	0.114292	1.5793	0.114267	0.633771	DUF3867 domain-containing protein	WP_003419758.1
gene-UAB	UAB_RS0208645	167.718	-0.375783	0.237384	-1.58302	0.113417	0.633771	ABC transporter permease	WP_009902561.1
gene-UAB	UAB_RS0208790	3731.93	0.152591	0.0962484	1.58539	0.112878	0.633771	SIR2 family protein	WP_003429805.1
gene-UAB	UAB_RS0209275	785.2	0.189786	0.120366	1.57674	0.114854	0.633771	PepSY domain-containing protein	WP_009902665.1
gene-UAB	UAB_RS0209925	37.805	-0.63154	0.400172	-1.57817	0.114526	0.633771	glycine/sarcosine/betaine reductase component B subunit	WP_004454406.1
gene-UAB	UAB_RS0211490	950.597	-0.215847	0.136866	-1.57706	0.114781	0.633771	hypothetical protein	WP_009902980.1
gene-UAB	UAB_RS0213095	1136.41	0.208025	0.131219	1.58532	0.112893	0.633771	L-aspartate oxidase	WP_009903160.1
gene-UAB	UAB_RS0213330	51.0723	-0.504824	0.318315	-1.58593	0.112756	0.633771	PTS glucitol/sorbitol transporter subunit IIB	WP_004454715.1
gene-UAB	UAB_RS0213990	14584.3	0.167786	0.106139	1.58081	0.113921	0.633771	cation:dicarboxylase symporter family transporter	WP_009903244.1
gene-UAB	UAB_RS0214840	11635.1	-0.187118	0.118487	-1.57924	0.114282	0.633771	NCS2 family permease	WP_003421552.1
gene-UAB	UAB_RS0215385	1057.24	0.202333	0.12784	1.58271	0.113488	0.633771	membrane protein	WP_004454079.1
gene-UAB	UAB_RS0215515	97.4202	-0.392271	0.248228	-1.58029	0.114041	0.633771	serine hydroxymethyltransferase	WP_003436123.1
gene-UAB	UAB_RS0216185	61650.7	-0.140947	0.0894113	-1.57639	0.114937	0.633771	PRD domain-containing protein	WP_003432034.1
gene-UAB	UAB_RS0216255	564.735	-0.212848	0.134907	-1.57774	0.114626	0.633771	acyl-CoA reductase	WP_003439905.1
gene-UAB	UAB_RS0216955	1.53777	3.86551	2.45038	1.57752	0.114677	0.633771	hypothetical protein	WP_009903546.1
gene-UAB	UAB_RS0218465	4289.14	0.157001	0.0994649	1.57846	0.11446	0.633771	cobyrinate a,c-diamide synthase	WP_009898677.1
gene-UAB	UAB_RS0218895	2809.44	-0.165359	0.104645	-1.58019	0.114064	0.633771	pur operon repressor	WP_003425934.1
gene-UAB	UAB_RS0202860	654.02	-0.21962	0.139404	-1.57542	0.115159	0.634002	0	WP_003434217.1
gene-UAB	UAB_RS0206825	34.7405	0.67317	0.427484	1.57473	0.115319	0.634002	hypothetical protein	WP_009902313.1
gene-UAB	UAB_RS0202450	162.254	0.309008	0.196434	1.57309	0.115699	0.634214	0	WP_003436034.1
gene-UAB	UAB_RS0217815	3347.87	0.143564	0.0912418	1.57344	0.115616	0.634214	DUF4041 domain-containing protein	WP_009894671.1
gene-UAB	UAB_RS0200535	63.3872	-0.467615	0.29898	-1.56404	0.117809	0.634836	GNAT family N-acetyltransferase	WP_003437411.1
gene-UAB	UAB_RS0200850	559.679	-0.193318	0.123833	-1.56112	0.118497	0.634836	0	WP_004453983.1
gene-UAB	UAB_RS0204375	229.866	-0.280088	0.178504	-1.56909	0.116628	0.634836	cation:proton antiporter	WP_009895690.1
gene-UAB	UAB_RS0204780	9278.91	-0.152268	0.0975269	-1.56129	0.118455	0.634836	CO dehydrogenase/CO-methylating acetyl-CoA synthase complex subunit beta	WP_003418359.1
gene-UAB	UAB_RS0204900	909.579	-0.196698	0.125696	-1.56487	0.117614	0.634836	transporter substrate-binding domain-containing protein	WP_003432207.1
gene-UAB	UAB_RS0207380	27.4733	-0.698647	0.446563	-1.5645	0.117701	0.634836	GerW family sporulation protein	WP_003419458.1
gene-UAB	UAB_RS0208535	748.127	0.211432	0.135017	1.56596	0.117357	0.634836	GNAT family N-acetyltransferase	WP_003427501.1
gene-UAB	UAB_RS0209465	2045.47	-0.155046	0.0992782	-1.56173	0.118351	0.634836	HAD-IC family P-type ATPase	WP_009902690.1
gene-UAB	UAB_RS0209765	2360.57	-0.158227	0.101185	-1.56375	0.117876	0.634836	molybdenum cofactor guanylyltransferase	WP_009896849.1
gene-UAB	UAB_RS0209810	6423.18	-0.179547	0.115084	-1.56014	0.118726	0.634836	hydantoinase/oxoprolinase family protein	WP_004454432.1
gene-UAB	UAB_RS0213035	4062.6	-0.15258	0.0978399	-1.55948	0.118882	0.634836	hypothetical protein	WP_009903159.1
gene-UAB	UAB_RS0213695	1526.07	0.206476	0.13184	1.56611	0.117322	0.634836	PTS fructose transporter subunit IIC	WP_004454776.1
gene-UAB	UAB_RS0213845	6438.36	-0.179049	0.114501	-1.56374	0.11788	0.634836	asparaginase	WP_003431031.1
gene-UAB	UAB_RS0216055	77.6164	0.471361	0.300399	1.56912	0.116621	0.634836	2-keto-3-deoxygluconate permease	WP_003422586.1
gene-UAB	UAB_RS0217575	3509.57	0.493872	0.315589	1.56492	0.117602	0.634836	hypothetical protein	WP_003428088.1
gene-UAB	UAB_RS0218755	577.877	-0.239938	0.152689	-1.57142	0.116085	0.634836	oligoendopeptidase F	WP_009903791.1
gene-UAB	UAB_RS0218910	421.859	-0.230994	0.147966	-1.56112	0.118495	0.634836	cation transporter	WP_003425940.1
gene-UAB	UAB_RS0219560	45.0829	-0.614066	0.393623	-1.56004	0.118751	0.634836	PTS sugar transporter subunit IIC	WP_003435718.1
gene-UAB	UAB_RS0210850	122.185	0.384558	0.246921	1.55741	0.119373	0.636541	FtsX-like permease family protein	WP_009902855.1
gene-UAB	UAB_RS0200640	22.7875	-0.771666	0.496393	-1.55455	0.120054	0.638344	hypothetical protein	WP_009894742.1
gene-UAB	UAB_RS0207290	13292.5	0.230117	0.148	1.55484	0.119984	0.638344	Fe-S cluster assembly scaffold protein NifU	WP_009902397.1
gene-UAB	UAB_RS0211595	72.7142	-0.40288	0.259289	-1.55379	0.120235	0.638396	(2Fe-2S)-binding protein	WP_009902996.1
gene-UAB	UAB_RS0211505	837.651	0.180664	0.116415	1.55189	0.120688	0.639885	molybdenum cofactor cytidylyltransferase	WP_009890188.1
gene-UAB	UAB_RS0210635	245.495	-0.282407	0.1821	-1.55084	0.120941	0.639936	EutP/PduV family microcompartment system protein	WP_003435437.1
gene-UAB	UAB_RS0212610	13.0653	-1.01019	0.65156	-1.55042	0.121041	0.639936	PTS sugar transporter subunit IIA	WP_009890480.1
gene-UAB	UAB_RS02000000219915	0.973597	-4.10746	2.65333	-1.54804	0.121612	0.640386	hypothetical protein	WP_009901506.1
gene-UAB	UAB_RS0214105	215.944	-0.277831	0.179444	-1.54829	0.121552	0.640386	hypothetical protein	WP_009893656.1
gene-UAB	UAB_RS0218290	4309.44	0.187296	0.120999	1.54792	0.121642	0.640386	YvcK family protein	WP_009903744.1
gene-UAB	UAB_RS0201450	38445.6	0.15303	0.0993744	1.53994	0.123576	0.645328	0	WP_003432446.1
gene-UAB	UAB_RS0201655	7.87862	-1.60881	1.04418	-1.54074	0.12338	0.645328	0	WP_009901617.1
gene-UAB	UAB_RS0201840	1099.82	-0.284095	0.184593	-1.53904	0.123795	0.645328	0	WP_009901661.1
gene-UAB	UAB_RS0201890	2485.55	0.160772	0.104344	1.54079	0.123368	0.645328	0	WP_009895228.1
gene-UAB	UAB_RS0203330	618.776	0.212162	0.137684	1.54093	0.123334	0.645328	0	WP_085953674.1
gene-UAB	UAB_RS0208765	19.423	-0.765432	0.497182	-1.53954	0.123672	0.645328	ACT domain-containing protein	WP_003429800.1
gene-UAB	UAB_RS0213635	1768.37	-0.17548	0.113901	-1.54064	0.123405	0.645328	DNA polymerase III subunit delta	WP_003430958.1
gene-UAB	UAB_RS0203525	572.485	-0.25792	0.168026	-1.535	0.124784	0.649573	0	WP_003434723.1
gene-UAB	UAB_RS0203865	2437.47	0.134091	0.0875459	1.53166	0.125605	0.652065	0	WP_003436982.1
gene-UAB	UAB_RS0207530	8496.94	0.165915	0.108727	1.52598	0.127014	0.652065	recombinase RecA	WP_003428218.1
gene-UAB	UAB_RS0210895	389.758	0.216832	0.141836	1.52875	0.126326	0.652065	response regulator transcription factor	WP_009897090.1
gene-UAB	UAB_RS0213040	11195.8	-0.175268	0.114743	-1.52748	0.126641	0.652065	ABC transporter ATP-binding protein	WP_003430772.1
gene-UAB	UAB_RS0213175	39.6025	-0.607819	0.398303	-1.52602	0.127004	0.652065	hypothetical protein	WP_004454683.1
gene-UAB	UAB_RS0215800	771.699	-0.219016	0.143231	-1.52911	0.126238	0.652065	V-type ATP synthase subunit D	WP_009903358.1
gene-UAB	UAB_RS0217995	395.265	0.222542	0.145737	1.52701	0.12676	0.652065	DUF881 domain-containing protein	WP_003427945.1
gene-UAB	UAB_RS0218630	1153.43	0.172987	0.113306	1.52673	0.126829	0.652065	CBS domain-containing protein	WP_003421362.1
gene-UAB	UAB_RS0219520	130.526	-0.401884	0.263356	-1.52601	0.127006	0.652065	NAD(P)H-dependent oxidoreductase	WP_003435738.1
gene-UAB	RS2000000221970	335.208	0.259049	0.169305	1.53007	0.125999	0.652065	#N/A	#N/A
gene-UAB	UAB_RS0206785	6218.8	-0.189983	0.12467	-1.52389	0.127536	0.653791	U32 family peptidase	WP_003438167.1
gene-UAB	UAB_RS0215940	1303.84	0.225656	0.148144	1.52323	0.127702	0.653791	type I-B CRISPR-associated protein Cas8b1/Cst1	WP_009903372.1
gene-UAB	UAB_RS0210515	1.34604	-3.57563	2.34924	-1.52204	0.127999	0.654412	hypothetical protein	WP_003435514.1
gene-UAB	UAB_RS0203050	298.993	-0.252889	0.166233	-1.52129	0.128186	0.654471	0	WP_003427784.1
gene-UAB	UAB_RS0215415	864.674	0.208187	0.136945	1.52023	0.128454	0.65494	hypothetical protein	WP_003426603.1
gene-UAB	UAB_RS0201975	4471.66	0.154489	0.101847	1.51687	0.129299	0.657445	0	WP_003434478.1
gene-UAB	RS2000000221980	108.031	-0.363552	0.23966	-1.51695	0.12928	0.657445	#N/A	#N/A
gene-UAB	UAB_RS0201265	56995.8	-0.205448	0.136267	-1.50769	0.131633	0.658517	0	WP_003427733.1
gene-UAB	UAB_RS0202160	754.87	0.186507	0.123492	1.51028	0.130972	0.658517	0	WP_009901705.1
gene-UAB	UAB_RS0204095	272.474	-0.251276	0.16605	-1.51325	0.130215	0.658517	0	WP_009902017.1
gene-UAB	UAB_RS0208460	358.257	-0.200996	0.133076	-1.51038	0.130946	0.658517	TlpA family protein disulfide reductase	WP_009902539.1
gene-UAB	UAB_RS0210265	5917.44	0.140859	0.0930038	1.51454	0.129888	0.658517	tyrosine-type recombinase/integrase	WP_009902775.1
gene-UAB	UAB_RS0211825	1200.91	-0.161446	0.107077	-1.50776	0.131617	0.658517	flavodoxin-dependent (E)-4-hydroxy-3-methylbut-2-enyl-diphosphate synthase	WP_003424490.1
gene-UAB	UAB_RS0211905	35.2737	0.574729	0.38093	1.50875	0.131363	0.658517	sporulation membrane protein YtaF	WP_003433989.1
gene-UAB	UAB_RS0214150	199.412	0.299583	0.198587	1.50858	0.131407	0.658517	response regulator transcription factor	WP_003431132.1
gene-UAB	UAB_RS0214605	16.8447	0.817652	0.541321	1.51048	0.130922	0.658517	hypothetical protein	WP_003427009.1
gene-UAB	UAB_RS0214795	4552.53	-0.144001	0.0954711	-1.50832	0.131473	0.658517	aspartate--ammonia ligase	WP_003427105.1
gene-UAB	UAB_RS0215760	271.12	-0.260727	0.172727	-1.50947	0.131178	0.658517	PTS sugar transporter subunit IIC	WP_003439696.1
gene-UAB	UAB_RS0216015	943.414	0.217268	0.143422	1.51489	0.129801	0.658517	pentapeptide repeat-containing protein	WP_009898087.1
gene-UAB	UAB_RS0219100	14557.5	-0.169842	0.112838	-1.50518	0.132277	0.660852	ECF transporter S component	WP_009903817.1
gene-UAB	UAB_RS0206035	23058.3	0.196773	0.130905	1.50317	0.132794	0.662548	3-hydroxybutyryl-CoA dehydrogenase	WP_003418897.1
gene-UAB	UAB_RS0218720	1310.76	-0.185159	0.123287	-1.50185	0.133137	0.663366	ZIP family metal transporter	WP_003425887.1
gene-UAB	UAB_RS0204610	561.305	0.199973	0.133495	1.49798	0.13414	0.66747	0	WP_009902104.1
gene-UAB	UAB_RS0205260	8221.24	0.131984	0.0881953	1.4965	0.134524	0.667599	rubrerythrin family protein	WP_003418513.1
gene-UAB	UAB_RS0214110	30.2249	-0.735186	0.491118	-1.49697	0.134402	0.667599	Rpn family recombination-promoting nuclease/putative transposase	WP_009903256.1
gene-UAB	UAB_RS0212135	2833.5	0.17835	0.119304	1.49493	0.134933	0.668734	glycoside hydrolase family 65 protein	WP_009903074.1
gene-UAB	UAB_RS0205240	1056.35	-0.214565	0.143619	-1.49399	0.135179	0.669066	HAMP domain-containing histidine kinase	WP_021404140.1
gene-UAB	UAB_RS0211565	79.9472	-0.416521	0.279138	-1.49217	0.135655	0.669685	amidohydrolase	WP_009902990.1
gene-UAB	UAB_RS0212525	30222.5	-0.12881	0.0863263	-1.49213	0.135664	0.669685	peptidylprolyl isomerase	WP_009890455.1
gene-UAB	UAB_RS02000000219990	18.256	-1.1835	0.797699	-1.48364	0.137904	0.670641	0	WP_009901619.1
gene-UAB	UAB_RS0200030	147.058	-0.387913	0.261033	-1.48607	0.137261	0.670641	0	0
gene-UAB	UAB_RS0206450	26494.4	-0.139827	0.0942265	-1.48395	0.137823	0.670641	ribosomal-processing cysteine protease Prp	WP_003438074.1
gene-UAB	UAB_RS0210785	14081.6	-0.158609	0.106865	-1.4842	0.137756	0.670641	acetyl-CoA carboxylase carboxyltransferase subunit alpha	WP_009889903.1
gene-UAB	UAB_RS0210860	3108.49	-0.201661	0.136025	-1.48253	0.1382	0.670641	YitT family protein	WP_003435320.1
gene-UAB	UAB_RS0211140	2436.54	-0.218984	0.147418	-1.48546	0.137422	0.670641	alpha/beta hydrolase	WP_009902917.1
gene-UAB	UAB_RS0211555	30.3572	0.667324	0.448614	1.48753	0.136876	0.670641	FAD binding domain-containing protein	WP_009890208.1
gene-UAB	UAB_RS0211575	146.404	-0.304703	0.205462	-1.48301	0.138071	0.670641	YgeY family selenium metabolism-linked hydrolase	WP_009893427.1
gene-UAB	UAB_RS0212640	32.9097	-0.62957	0.424385	-1.48349	0.137945	0.670641	AzlD domain-containing protein	WP_004454564.1
gene-UAB	UAB_RS0215640	213.157	-0.30966	0.208674	-1.48394	0.137824	0.670641	amidohydrolase family protein	WP_009898031.1
gene-UAB	UAB_RS0216265	30.4443	0.660742	0.444682	1.48588	0.137312	0.670641	DUF871 domain-containing protein	WP_009903422.1
gene-UAB	UAB_RS0218065	1939.27	0.212523	0.143131	1.48482	0.137592	0.670641	DUF3783 domain-containing protein	WP_009898485.1
gene-UAB	UAB_RS0218510	304.957	-0.256415	0.172153	-1.48946	0.136367	0.670641	pyridoxal phosphate-dependent aminotransferase	WP_003437779.1
gene-UAB	UAB_RS02000000220110	3466.99	0.180805	0.122829	1.472	0.141021	0.670953	0	WP_125026147.1
gene-UAB	UAB_RS0201205	20083.5	-0.266113	0.179985	-1.47853	0.139267	0.670953	0	WP_003421138.1
gene-UAB	UAB_RS0202365	3105.9	0.225036	0.152982	1.47099	0.141293	0.670953	0	WP_003436062.1
gene-UAB	UAB_RS0202590	3020.53	-0.152942	0.104234	-1.46729	0.142298	0.670953	0	WP_009901761.1
gene-UAB	UAB_RS0203775	3077.95	0.20796	0.141117	1.47367	0.140571	0.670953	0	WP_025992017.1
gene-UAB	UAB_RS0205705	5177.17	-0.181157	0.122595	-1.47769	0.139491	0.670953	PaaI family thioesterase	WP_003437086.1
gene-UAB	UAB_RS0205995	3052.23	0.225859	0.152828	1.47786	0.139444	0.670953	ABC transporter ATP-binding protein	WP_009896018.1
gene-UAB	UAB_RS0207470	26498.6	-0.162961	0.110986	-1.4683	0.142022	0.670953	30S ribosomal protein S15	WP_003419491.1
gene-UAB	UAB_RS0207660	5436.17	-0.153814	0.104189	-1.4763	0.139862	0.670953	pyridoxamine kinase	WP_003428191.1
gene-UAB	UAB_RS0210075	2590.16	0.133459	0.0906875	1.47164	0.141118	0.670953	NUDIX hydrolase	WP_009889720.1
gene-UAB	UAB_RS0210100	332.945	-0.221374	0.150003	-1.47579	0.139999	0.670953	methylated-DNA--[protein]-cysteine S-methyltransferase	WP_009902761.1
gene-UAB	UAB_RS0210475	9603.62	0.158943	0.107622	1.47687	0.139712	0.670953	PAS domain-containing protein	WP_009902804.1
gene-UAB	UAB_RS0210830	492.387	-0.227425	0.15375	-1.47918	0.139091	0.670953	VOC family protein	WP_009902853.1
gene-UAB	UAB_RS0210980	4851.89	-0.13393	0.0913028	-1.46687	0.142411	0.670953	RNA chaperone Hfq	WP_003428780.1
gene-UAB	UAB_RS0211460	3758.64	0.128718	0.0876198	1.46905	0.141818	0.670953	lactate utilization protein	WP_003435129.1
gene-UAB	UAB_RS0214405	1374.47	0.150601	0.102645	1.4672	0.142322	0.670953	YggT family protein	WP_003416163.1
gene-UAB	UAB_RS0215305	3814.4	0.125341	0.0850062	1.47449	0.140349	0.670953	cell wall-binding protein Cwp11	WP_021368758.1
gene-UAB	UAB_RS0215710	3976.76	0.144735	0.0977195	1.48113	0.138572	0.670953	GGDEF domain-containing protein	WP_009898049.1
gene-UAB	UAB_RS0215835	2530.2	0.201353	0.137232	1.46724	0.14231	0.670953	V-type ATP synthase subunit I	WP_009898067.1
gene-UAB	UAB_RS0216240	2673.08	0.212427	0.144788	1.46716	0.142333	0.670953	membrane protein	WP_003439901.1
gene-UAB	UAB_RS0216560	15705.3	-0.13691	0.0927443	-1.47621	0.139888	0.670953	YfcC family protein	WP_003440000.1
gene-UAB	UAB_RS0218135	3588.81	-0.140522	0.0957933	-1.46692	0.142397	0.670953	hypothetical protein	WP_003437274.1
gene-UAB	UAB_RS0218980	31.4377	-0.728247	0.494369	-1.47308	0.140729	0.670953	ABC transporter ATP-binding protein	WP_009898745.1
gene-UAB	UAB_RS0219490	206.011	0.239942	0.163982	1.46322	0.143407	0.674793	transcription antiterminator	WP_021372834.1
gene-UAB	UAB_RS0207820	167.434	0.28054	0.191968	1.46139	0.143908	0.676293	TetR/AcrR family transcriptional regulator	WP_003438468.1
gene-UAB	UAB_RS0202850	2873.65	0.163809	0.11229	1.45881	0.144618	0.678774	0	WP_003429705.1
gene-UAB	UAB_RS0201250	21600	-0.210067	0.144692	-1.45182	0.146551	0.678841	0	WP_003421125.1
gene-UAB	UAB_RS0202760	4225.93	0.134548	0.0925908	1.45315	0.146182	0.678841	0	WP_003435926.1
gene-UAB	UAB_RS0203425	15.4769	-0.833095	0.572594	-1.45495	0.145683	0.678841	0	WP_009901907.1
gene-UAB	UAB_RS0203770	3280.4	0.215589	0.148195	1.45476	0.145735	0.678841	0	WP_003425090.1
gene-UAB	UAB_RS0209250	253.141	-0.300071	0.206449	-1.45349	0.146088	0.678841	GntR family transcriptional regulator	WP_003430051.1
gene-UAB	UAB_RS0210660	30.7626	0.586442	0.403373	1.45384	0.145989	0.678841	ethanolamine ammonia-lyase subunit EutC	WP_009902836.1
gene-UAB	UAB_RS0212455	1311.96	0.162776	0.112126	1.45172	0.146578	0.678841	VWA domain-containing protein	WP_009903109.1
gene-UAB	UAB_RS0213460	1552.42	0.176284	0.121198	1.45452	0.145802	0.678841	PhoH family protein	WP_003430896.1
gene-UAB	UAB_RS0216295	392.347	0.208991	0.143982	1.45151	0.146638	0.678841	response regulator transcription factor	WP_009903427.1
gene-UAB	UAB_RS0217605	42413.5	0.427761	0.294522	1.45239	0.146393	0.678841	D-proline reductase (dithiol) proprotein PrdA	WP_003422104.1
gene-UAB	UAB_RS0218985	19.7436	0.88438	0.60732	1.4562	0.145337	0.678841	alpha-D-ribose 1-methylphosphonate 5-phosphate C-P-lyase PhnJ	WP_003435861.1
gene-UAB	UAB_RS0203220	21.9091	-0.690937	0.476723	-1.44935	0.147241	0.679096	0	WP_009901839.1
gene-UAB	UAB_RS0210260	6476.9	0.161027	0.111012	1.45054	0.146909	0.679096	tyrosine-type recombinase/integrase	WP_025992027.1
gene-UAB	UAB_RS0218255	334.933	0.251166	0.173283	1.44946	0.147209	0.679096	hypothetical protein	WP_009898526.1
gene-UAB	UAB_RS0200090	422.472	-0.328621	0.227359	-1.44539	0.148349	0.683232	phage tail protein	WP_009901337.1
gene-UAB	UAB_RS0215565	139.052	-0.278955	0.193158	-1.44418	0.148688	0.683232	MarR family transcriptional regulator	WP_003436793.1
gene-UAB	UAB_RS0218440	2113.34	0.21665	0.149969	1.44463	0.148562	0.683232	cobalt-precorrin-5B (C(1))-methyltransferase	WP_009903760.1
gene-UAB	UAB_RS0204690	3033.1	-0.139998	0.0970999	-1.44179	0.149362	0.68548	0	WP_009902113.1
gene-UAB	UAB_RS0216985	6761.44	0.181286	0.125797	1.44109	0.149558	0.685536	type I restriction endonuclease subunit R	WP_009903553.1
gene-UAB	UAB_RS0204230	122.739	0.366772	0.254838	1.43924	0.150083	0.687097	0	WP_009902041.1
gene-UAB	UAB_RS0200945	620.562	-0.217536	0.151488	-1.436	0.151004	0.688919	0	WP_009901555.1
gene-UAB	UAB_RS0206460	6846.33	-0.13475	0.0938452	-1.43588	0.151037	0.688919	GTPase ObgE	WP_009902286.1
gene-UAB	UAB_RS0215545	1856.38	0.15156	0.105489	1.43674	0.150793	0.688919	serine--tRNA ligase	WP_009898007.1
gene-UAB	UAB_RS0201215	41888.7	-0.202621	0.141255	-1.43443	0.15145	0.68996	0	WP_003421135.1
gene-UAB	UAB_RS0203965	761.568	0.195348	0.136264	1.4336	0.151686	0.69019	0	WP_009888369.1
gene-UAB	UAB_RS0201865	28.0914	-0.615681	0.43116	-1.42796	0.153303	0.696638	0	WP_005927589.1
gene-UAB	UAB_RS0209575	409.899	-0.233144	0.16334	-1.42736	0.153477	0.696638	HAMP domain-containing histidine kinase	WP_009902713.1
gene-UAB	UAB_RS0205025	2968.56	0.139892	0.0980816	1.42628	0.153787	0.697192	LacI family DNA-binding transcriptional regulator	WP_003437479.1
gene-UAB	UAB_RS0206025	27604.5	0.18559	0.130368	1.42359	0.154566	0.697325	electron transfer flavoprotein subunit alpha/FixB family protein	WP_003428573.1
gene-UAB	UAB_RS0212605	13.9011	-0.992582	0.696351	-1.42541	0.15404	0.697325	PTS sugar transporter subunit IIB	WP_003423222.1
gene-UAB	UAB_RS0216160	332.486	-0.219898	0.154444	-1.4238	0.154503	0.697325	DUF2087 domain-containing protein	WP_009891335.1
gene-UAB	UAB_RS0218335	8591.83	0.136777	0.0960269	1.42436	0.154343	0.697325	mannonate oxidoreductase	WP_009903750.1
gene-UAB	UAB_RS0212620	198.92	0.265219	0.18643	1.42262	0.154848	0.697751	DUF3284 domain-containing protein	WP_009903132.1
gene-UAB	UAB_RS0202955	310.98	0.256687	0.180998	1.41818	0.156139	0.702721	0	WP_003434815.1
gene-UAB	UAB_RS0213820	1514.92	-0.147577	0.104212	-1.41612	0.15674	0.704573	PRD domain-containing protein	WP_003431027.1
gene-UAB	UAB_RS0204935	3023.42	0.1483	0.104784	1.41529	0.156983	0.704815	0	WP_009902142.1
gene-UAB	UAB_RS0203460	7910.5	0.143073	0.101209	1.41364	0.157467	0.705487	0	WP_009901919.1
gene-UAB	UAB_RS0206050	1779.82	-0.160401	0.11353	-1.41284	0.157702	0.705487	nucleoid-associated protein	WP_003437972.1
gene-UAB	RS2000000221835	15483.7	-1.10965	0.785295	-1.41303	0.157646	0.705487	#N/A	#N/A
gene-UAB	UAB_RS0210915	235.202	-0.225082	0.159455	-1.41157	0.158077	0.70632	ABC transporter ATP-binding protein	WP_009902864.1
gene-UAB	UAB_RS0207490	3598.32	0.140608	0.0996866	1.4105	0.158391	0.706872	insulinase family protein	WP_009902409.1
gene-UAB	UAB_RS0201235	9385.65	-0.216115	0.153545	-1.4075	0.159278	0.708284	0	WP_009895197.1
gene-UAB	UAB_RS0201585	2168.58	-0.1323	0.0939336	-1.40844	0.159001	0.708284	0	WP_003425424.1
gene-UAB	UAB_RS0202415	671.498	0.22288	0.158332	1.40767	0.159228	0.708284	0	WP_003436045.1
gene-UAB	UAB_RS0212195	2.73506	-2.35141	1.67437	-1.40435	0.160214	0.71087	4Fe-4S binding protein	WP_003423406.1
gene-UAB	RS2000000221260	3.83647	-1.66426	1.18515	-1.40426	0.160242	0.71087	#N/A	#N/A
gene-UAB	UAB_RS0216030	6353.72	0.117818	0.0839553	1.40334	0.160516	0.711239	ABC transporter substrate-binding protein	WP_009903390.1
gene-UAB	UAB_RS0203875	5149.13	-0.167336	0.119652	-1.39853	0.161954	0.714667	0	WP_003417965.1
gene-UAB	UAB_RS0206120	6933.78	-0.133094	0.0951378	-1.39896	0.161826	0.714667	aminopeptidase	WP_009902261.1
gene-UAB	UAB_RS0206575	2203.37	-0.151424	0.108199	-1.3995	0.161664	0.714667	sigma 54-interacting transcriptional regulator	WP_009902298.1
gene-UAB	UAB_RS0206955	17.7658	-0.775672	0.555395	-1.39661	0.16253	0.714667	VanZ family protein	WP_003436824.1
gene-UAB	UAB_RS0210435	837.497	-0.186264	0.133337	-1.39695	0.16243	0.714667	3-dehydroquinate synthase	WP_009893310.1
gene-UAB	UAB_RS0215095	2910.94	0.127548	0.0912447	1.39787	0.162153	0.714667	DUF4116 domain-containing protein	WP_009897920.1
gene-UAB	UAB_RS0218095	913.221	0.197836	0.141689	1.39627	0.162634	0.714667	formate dehydrogenase accessory sulfurtransferase FdhD	WP_009898490.1
gene-UAB	UAB_RS0202350	2395.86	0.177674	0.127479	1.39375	0.163395	0.715248	0	WP_009901733.1
gene-UAB	UAB_RS0209795	631.445	-0.229235	0.164584	-1.39282	0.163674	0.715248	molybdenum cofactor sulfurase	WP_004454437.1
gene-UAB	UAB_RS0209805	4665.84	-0.165185	0.118612	-1.39265	0.163727	0.715248	DUF917 domain-containing protein	WP_009896855.1
gene-UAB	UAB_RS0214910	17819.4	0.14749	0.105828	1.39367	0.163417	0.715248	SPOR domain-containing protein	WP_021403625.1
gene-UAB	UAB_RS0218880	26288.6	-0.138851	0.0995672	-1.39455	0.163152	0.715248	ribose-phosphate pyrophosphokinase	WP_003421448.1
gene-UAB	UAB_RS0216260	71.0485	0.409423	0.294229	1.39151	0.16407	0.715905	N-acetylmuramic acid 6-phosphate etherase	WP_003431390.1
gene-UAB	UAB_RS0201030	3652.14	0.167433	0.120457	1.38998	0.164536	0.716259	0	WP_009887855.1
gene-UAB	UAB_RS0208330	211.095	0.269983	0.194193	1.39028	0.164443	0.716259	ferrous iron transport protein B	WP_009902527.1
gene-UAB	UAB_RS02000000219970	238.453	0.300882	0.218412	1.37759	0.168329	0.716843	0	WP_003421202.1
gene-UAB	UAB_RS02000000220755	7946.69	-0.149385	0.108406	-1.37801	0.1682	0.716843	hypothetical protein	WP_009890506.1
gene-UAB	UAB_RS0200050	10.0344	1.03585	0.750241	1.38069	0.167375	0.716843	DUF2634 domain-containing protein	WP_009901330.1
gene-UAB	UAB_RS0201660	1.40103	-3.4754	2.50952	-1.38489	0.166087	0.716843	0	WP_009901618.1
gene-UAB	UAB_RS0202950	43966.1	0.154014	0.111156	1.38556	0.16588	0.716843	0	WP_009901787.1
gene-UAB	UAB_RS0203345	1.07069	-3.72643	2.69981	-1.38026	0.167508	0.716843	0	WP_009901890.1
gene-UAB	UAB_RS0204285	263.53	0.256811	0.185691	1.383	0.166665	0.716843	0	WP_003440129.1
gene-UAB	UAB_RS0205615	13941	-0.172321	0.124787	-1.38092	0.167304	0.716843	DUF1846 domain-containing protein	WP_003437136.1
gene-UAB	UAB_RS0206015	28675.7	0.194236	0.140949	1.37806	0.168185	0.716843	acyl-CoA dehydrogenase	WP_003418888.1
gene-UAB	UAB_RS0208650	13383.5	-0.176522	0.127149	-1.38831	0.165043	0.716843	MATE family efflux transporter	WP_003436703.1
gene-UAB	UAB_RS0209415	50.1427	-0.477907	0.34611	-1.3808	0.167342	0.716843	siderophore ABC transporter substrate-binding protein	WP_009902686.1
gene-UAB	UAB_RS0210890	599.156	0.179319	0.129655	1.38305	0.166651	0.716843	HAMP domain-containing histidine kinase	WP_009897088.1
gene-UAB	UAB_RS0211355	949.492	-0.18011	0.129801	-1.38759	0.165263	0.716843	TetR/AcrR family transcriptional regulator	WP_009902964.1
gene-UAB	UAB_RS0212950	30735.4	-0.128357	0.0930831	-1.37895	0.167911	0.716843	membrane protein	WP_003430743.1
gene-UAB	UAB_RS0213515	2275.77	0.185447	0.133734	1.38668	0.165539	0.716843	CRISPR-associated helicase/endonuclease Cas3	WP_009903197.1
gene-UAB	UAB_RS0213675	421.135	-0.21359	0.154585	-1.3817	0.167065	0.716843	NusG domain II-containing protein	WP_003416526.1
gene-UAB	UAB_RS0214710	55.6035	-0.474252	0.344201	-1.37783	0.168254	0.716843	3-hydroxybutyrate dehydrogenase	WP_009890906.1
gene-UAB	UAB_RS0217440	3875.26	0.167609	0.121451	1.38005	0.167572	0.716843	ABC transporter permease subunit	WP_009903651.1
gene-UAB	UAB_RS0218330	20373.2	0.141475	0.101939	1.38784	0.165185	0.716843	2Fe-2S iron-sulfur cluster binding domain-containing protein	WP_003429109.1
gene-UAB	UAB_RS0209400	32.3587	-0.599996	0.436106	-1.3758	0.168883	0.717741	iron chelate uptake ABC transporter family permease subunit	WP_009902683.1
gene-UAB	UAB_RS0219270	10861.4	0.137004	0.0995911	1.37566	0.168926	0.717741	carbamoyl-phosphate synthase large subunit	WP_009903826.1
gene-UAB	UAB_RS0202420	639.199	0.243636	0.177368	1.37361	0.169562	0.718367	0	WP_003436043.1
gene-UAB	UAB_RS0206910	21.1932	-0.791057	0.576017	-1.37332	0.169652	0.718367	antirestriction protein ArdA	WP_009902330.1
gene-UAB	UAB_RS0208185	1117.86	-0.171242	0.124584	-1.37451	0.169285	0.718367	dihydroneopterin aldolase	WP_009889257.1
gene-UAB	UAB_RS0200105	40.6726	-0.630129	0.461406	-1.36567	0.172043	0.719794	0	0
gene-UAB	UAB_RS0202890	855.773	0.176192	0.128629	1.36977	0.170759	0.719794	0	WP_003434205.1
gene-UAB	UAB_RS0203300	645.728	0.201618	0.147734	1.36473	0.172337	0.719794	0	WP_009901879.1
gene-UAB	UAB_RS0205220	1739.14	0.186341	0.13625	1.36763	0.171427	0.719794	0	WP_009902183.1
gene-UAB	UAB_RS0205380	1675.85	-0.168157	0.123384	-1.36288	0.172922	0.719794	amidohydrolase	WP_004453606.1
gene-UAB	UAB_RS0205430	1729.17	0.135179	0.099139	1.36353	0.172715	0.719794	sigma-54-dependent transcriptional regulator	WP_009895886.1
gene-UAB	UAB_RS0205785	298.928	0.263103	0.192494	1.36681	0.171685	0.719794	GntR family transcriptional regulator	WP_003437044.1
gene-UAB	UAB_RS0207955	1160.34	-0.13823	0.101093	-1.36736	0.171514	0.719794	M15 family metallopeptidase	WP_003438525.1
gene-UAB	UAB_RS0209500	1813.95	-0.150944	0.110383	-1.36745	0.171485	0.719794	sugar O-acetyltransferase	WP_004454497.1
gene-UAB	UAB_RS0210125	321.285	0.232389	0.170547	1.36261	0.173005	0.719794	amino acid ABC transporter permease	WP_003430270.1
gene-UAB	UAB_RS0211585	137.985	-0.334666	0.244776	-1.36723	0.171553	0.719794	flavodoxin family protein	WP_003424384.1
gene-UAB	UAB_RS0212460	1287.33	0.153135	0.112169	1.36521	0.172186	0.719794	MoxR family ATPase	WP_003433818.1
gene-UAB	UAB_RS0214255	6514.28	-0.152676	0.112067	-1.36236	0.173083	0.719794	low-specificity L-threonine aldolase	WP_009903270.1
gene-UAB	UAB_RS0214315	7483.56	0.136817	0.100312	1.36391	0.172595	0.719794	LytTR family response regulator CdtR	WP_004454924.1
gene-UAB	UAB_RS0217285	4191.47	0.136684	0.100109	1.36535	0.172142	0.719794	cell wall-binding protein Cwp21	WP_009903618.1
gene-UAB	UAB_RS0217375	3137.3	0.148338	0.108199	1.37096	0.170386	0.719794	membrane protein insertase YidC	WP_003428030.1
gene-UAB	UAB_RS0201295	58078	-0.153151	0.11287	-1.35687	0.174821	0.723602	0	WP_003421107.1
gene-UAB	UAB_RS0208785	316.637	0.205286	0.151196	1.35774	0.174545	0.723602	ImmA/IrrE family metallo-endopeptidase	WP_003429804.1
gene-UAB	UAB_RS0212595	25.5442	-0.651783	0.480383	-1.3568	0.174845	0.723602	galactitol-1-phosphate 5-dehydrogenase	WP_009903127.1
gene-UAB	UAB_RS0214895	8215.41	0.13857	0.10216	1.3564	0.174971	0.723602	UTP--glucose-1-phosphate uridylyltransferase GalU	WP_014466379.1
gene-UAB	UAB_RS0218410	2071.98	0.200479	0.147556	1.35866	0.174253	0.723602	precorrin-6A reductase	WP_003437730.1
gene-UAB	UAB_RS0203110	235398	0.179183	0.132162	1.35578	0.175169	0.723617	0	WP_003427763.1
gene-UAB	UAB_RS0205345	664.979	-0.192812	0.142363	-1.35437	0.175619	0.723933	0	WP_009895870.1
gene-UAB	UAB_RS0212920	53539.9	-0.120885	0.0892591	-1.35432	0.175634	0.723933	4-hydroxybutyrate dehydrogenase	WP_009903149.1
gene-UAB	UAB_RS0208355	695.495	-0.178796	0.132181	-1.35267	0.176163	0.724095	ABC transporter ATP-binding protein	WP_009902530.1
gene-UAB	UAB_RS0209155	206.62	-0.267922	0.198113	-1.35237	0.176257	0.724095	serine O-acetyltransferase	WP_009889486.1
gene-UAB	UAB_RS0215010	4241.28	0.13285	0.0981855	1.35305	0.176039	0.724095	cell wall-binding protein Cwp14	WP_009903316.1
gene-UAB	UAB_RS0210470	3283.78	0.18518	0.137113	1.35057	0.176833	0.725659	bifunctional diguanylate cyclase/phosphodiesterase	WP_009897032.1
gene-UAB	UAB_RS0200220	54.2107	-0.430702	0.321845	-1.33823	0.180822	0.726592	hypothetical protein	WP_009896618.1
gene-UAB	UAB_RS0202030	132.577	-0.32744	0.243699	-1.34362	0.17907	0.726592	0	WP_009901685.1
gene-UAB	UAB_RS0202900	30743.6	-0.162829	0.120823	-1.34767	0.177765	0.726592	0	WP_009895388.1
gene-UAB	UAB_RS0203935	258.067	0.243098	0.181716	1.33779	0.180965	0.726592	0	WP_003417993.1
gene-UAB	UAB_RS0205020	44.4377	0.531746	0.394256	1.34873	0.177423	0.726592	0	WP_009902150.1
gene-UAB	UAB_RS0205850	70.2247	-0.368253	0.274433	-1.34187	0.179638	0.726592	CotH kinase family protein	WP_003437021.1
gene-UAB	UAB_RS0207065	91.7575	0.357165	0.266809	1.33866	0.180683	0.726592	hypothetical protein	WP_009902375.1
gene-UAB	UAB_RS0207245	4.93757	-1.57732	1.17824	-1.33871	0.180666	0.726592	YraN family protein	WP_009902392.1
gene-UAB	UAB_RS0208010	2547.94	0.156758	0.116979	1.34005	0.180229	0.726592	diphthine--ammonia ligase	WP_032507408.1
gene-UAB	UAB_RS0215070	2342.17	0.141693	0.105162	1.34737	0.177861	0.726592	AarF/ABC1/UbiB kinase family protein	WP_009891005.1
gene-UAB	UAB_RS0215360	1623.92	-0.16241	0.121237	-1.33961	0.180372	0.726592	Holliday junction branch migration DNA helicase RuvB	WP_003426579.1
gene-UAB	UAB_RS0215585	616.743	0.214023	0.159472	1.34207	0.179573	0.726592	hypothetical protein	WP_009891149.1
gene-UAB	UAB_RS0217000	850.508	0.172529	0.128563	1.34197	0.179604	0.726592	hypothetical protein	WP_009903557.1
gene-UAB	UAB_RS0217070	11.3454	-0.999329	0.746452	-1.33877	0.180645	0.726592	helix-turn-helix transcriptional regulator	WP_009903585.1
gene-UAB	UAB_RS0217125	413.4	0.208452	0.155086	1.34411	0.178913	0.726592	YfbM family protein	WP_003433730.1
gene-UAB	UAB_RS0217630	186.961	0.305649	0.228134	1.33978	0.180318	0.726592	polysaccharide deacetylase family protein	WP_004454018.1
gene-UAB	UAB_RS0217870	1289.69	-0.174592	0.13006	-1.3424	0.179466	0.726592	Gx transporter family protein	WP_009903693.1
gene-UAB	UAB_RS0218860	1388.62	0.145499	0.108419	1.342	0.179596	0.726592	PilN domain-containing protein	WP_003437881.1
gene-UAB	RS2000000221180	22.4527	-0.634822	0.470906	-1.34809	0.177631	0.726592	#N/A	#N/A
gene-UAB	RS2000000221965	29.0234	0.595455	0.443125	1.34376	0.179025	0.726592	#N/A	#N/A
gene-UAB	UAB_RS0205175	422.63	-0.227936	0.170703	-1.33528	0.181786	0.729101	0	WP_003437559.1
gene-UAB	UAB_RS0202865	518.653	-0.212663	0.159486	-1.33343	0.182392	0.729774	0	WP_009895383.1
gene-UAB	UAB_RS0217370	559.834	0.201205	0.15086	1.33372	0.182295	0.729774	response regulator transcription factor	WP_009898333.1
gene-UAB	UAB_RS0218445	1716.65	0.175878	0.131944	1.33297	0.182542	0.729774	cobalt-precorrin-8 methylmutase	WP_009903761.1
gene-UAB	UAB_RS0201610	532.002	0.197662	0.148542	1.33068	0.183293	0.730425	0	WP_003434429.1
gene-UAB	UAB_RS0206195	20.766	0.670928	0.503961	1.33131	0.183088	0.730425	zinc transporter ZupT	WP_009892895.1
gene-UAB	RS2000000221895	44.931	0.607786	0.456586	1.33115	0.183139	0.730425	#N/A	#N/A
gene-UAB	UAB_RS0201130	12319.7	-0.206744	0.155578	-1.32888	0.183888	0.73123	0	WP_003435681.1
gene-UAB	UAB_RS0215570	249.012	0.211588	0.159209	1.329	0.183849	0.73123	rubrerythrin family protein	WP_003426696.1
gene-UAB	UAB_RS0219325	1736.18	0.132749	0.0999643	1.32797	0.18419	0.731648	S-ribosylhomocysteine lyase	WP_003422312.1
gene-UAB	UAB_RS0204840	215.715	0.242659	0.183349	1.32348	0.185676	0.732678	0	WP_009902130.1
gene-UAB	UAB_RS0206800	3011.3	0.134784	0.101899	1.32272	0.185929	0.732678	recombinase family protein	WP_003438169.1
gene-UAB	UAB_RS0207750	588.951	0.28801	0.217114	1.32654	0.184661	0.732678	DUF2577 family protein	WP_003438447.1
gene-UAB	UAB_RS0209900	719.132	0.183962	0.139102	1.3225	0.186002	0.732678	YjjG family noncanonical pyrimidine nucleotidase	WP_004454416.1
gene-UAB	UAB_RS0210205	1358.45	0.185721	0.140108	1.32556	0.184986	0.732678	hypothetical protein	WP_003433614.1
gene-UAB	UAB_RS0215520	25.4022	0.73989	0.559278	1.32294	0.185856	0.732678	AbgT family transporter	WP_009891132.1
gene-UAB	UAB_RS0216860	348.556	-0.210887	0.159148	-1.3251	0.185139	0.732678	hypothetical protein	WP_009903522.1
gene-UAB	UAB_RS0217670	14003.4	0.127556	0.0964559	1.32243	0.186024	0.732678	valine--tRNA ligase	WP_009903676.1
gene-UAB	UAB_RS0210950	2767.52	-0.123915	0.0938491	-1.32036	0.186714	0.734619	DUF554 domain-containing protein	WP_003435276.1
gene-UAB	UAB_RS0208635	4238.77	-0.127295	0.0965755	-1.31808	0.187475	0.736836	EAL domain-containing protein	WP_009902557.1
gene-UAB	UAB_RS0206175	2659.3	0.144942	0.110139	1.31599	0.188176	0.737255	PTS sugar transporter subunit IIB	WP_003428537.1
gene-UAB	UAB_RS0208235	3381.62	-0.1813	0.137729	-1.31635	0.188057	0.737255	DUF1648 domain-containing protein	WP_009902515.1
gene-UAB	UAB_RS0210790	7823.07	-0.163346	0.124039	-1.31689	0.187874	0.737255	acetyl-CoA carboxylase carboxyltransferase subunit beta	WP_003424064.1
gene-UAB	UAB_RS0204500	451.495	0.209368	0.159342	1.31395	0.188862	0.737612	0	WP_009902081.1
gene-UAB	UAB_RS0208940	305.007	-0.236172	0.179671	-1.31447	0.188688	0.737612	hypothetical protein	WP_009902603.1
gene-UAB	UAB_RS0216220	3352.53	0.189655	0.14427	1.31458	0.188649	0.737612	hypothetical protein	WP_009903420.1
gene-UAB	UAB_RS0207055	103.827	0.31672	0.241473	1.31162	0.189649	0.738852	hypothetical protein	WP_009889005.1
gene-UAB	UAB_RS0213770	2885.01	-0.132703	0.101203	-1.31124	0.189775	0.738852	Cof-type HAD-IIB family hydrolase	WP_004454798.1
gene-UAB	UAB_RS0219055	1876.47	0.122715	0.0935617	1.3116	0.189656	0.738852	DNA polymerase III subunit delta'	WP_003435878.1
gene-UAB	UAB_RS0207785	237.007	0.300918	0.229607	1.31058	0.190001	0.738959	hypothetical protein	WP_003419670.1
gene-UAB	UAB_RS0218455	2583.57	0.145484	0.111102	1.30946	0.190378	0.73965	aminotransferase class I/II-fold pyridoxal phosphate-dependent enzyme	WP_009903764.1
gene-UAB	UAB_RS0201745	58.7958	-0.453584	0.346612	-1.30862	0.190663	0.73992	0	WP_009901636.1
gene-UAB	UAB_RS0213080	2300.04	-0.133541	0.102089	-1.30809	0.190844	0.73992	hypothetical protein	WP_003432954.1
gene-UAB	UAB_RS0200365	91.1343	-0.317972	0.246539	-1.28974	0.197141	0.7407	phage tail sheath subtilisin-like domain-containing protein	WP_009901460.1
gene-UAB	UAB_RS0201060	48697.4	-0.128629	0.099793	-1.28895	0.197414	0.7407	0	WP_003421189.1
gene-UAB	UAB_RS0201305	766.608	-0.206082	0.159685	-1.29056	0.196857	0.7407	0	WP_003435644.1
gene-UAB	UAB_RS0201835	333.308	-0.246079	0.190635	-1.29084	0.196759	0.7407	0	WP_025992012.1
gene-UAB	UAB_RS0202295	17.9459	-0.701425	0.53748	-1.30502	0.191885	0.7407	0	WP_003435043.1
gene-UAB	UAB_RS0202405	85.5581	0.35846	0.274526	1.30574	0.19164	0.7407	0	WP_009901737.1
gene-UAB	UAB_RS0202855	275.006	-0.253405	0.195949	-1.29322	0.195934	0.7407	0	WP_009895382.1
gene-UAB	UAB_RS0203095	277898	0.147537	0.113017	1.30544	0.191742	0.7407	0	WP_003427766.1
gene-UAB	UAB_RS0204070	2308.53	0.147697	0.113022	1.3068	0.191281	0.7407	0	WP_003429542.1
gene-UAB	UAB_RS0205335	2796.03	0.121921	0.0944379	1.29102	0.196696	0.7407	0	WP_009888650.1
gene-UAB	UAB_RS0205725	1720.74	-0.157094	0.121512	-1.29282	0.196072	0.7407	0	WP_025992022.1
gene-UAB	UAB_RS0206420	2901.33	-0.119948	0.0923332	-1.29907	0.193919	0.7407	transglutaminase domain-containing protein	WP_009902285.1
gene-UAB	UAB_RS0206630	8.33831	1.22727	0.94322	1.30115	0.193207	0.7407	stage III sporulation protein AF	WP_003438123.1
gene-UAB	UAB_RS0206790	849.52	-0.159356	0.122806	-1.29762	0.194417	0.7407	penicillin-binding protein 2	WP_009902312.1
gene-UAB	UAB_RS0207545	5662.63	0.13052	0.100294	1.30137	0.193131	0.7407	UvrD-helicase domain-containing protein	WP_003438344.1
gene-UAB	UAB_RS0207865	44.1258	-0.47396	0.366845	-1.29199	0.19636	0.7407	DUF819 family protein	WP_009902457.1
gene-UAB	UAB_RS0209050	1592.33	0.130984	0.100742	1.3002	0.193532	0.7407	SGNH/GDSL hydrolase family protein	WP_003436558.1
gene-UAB	UAB_RS0209095	142.016	0.277471	0.213827	1.29764	0.194411	0.7407	ROK family protein	WP_009902636.1
gene-UAB	UAB_RS0209170	382.988	0.249204	0.193298	1.28922	0.197322	0.7407	hypothetical protein	WP_009902644.1
gene-UAB	UAB_RS0209225	50.2159	0.521631	0.403259	1.29354	0.195825	0.7407	ABC transporter permease	WP_009902655.1
gene-UAB	UAB_RS0209430	939.782	0.168635	0.129651	1.30068	0.193367	0.7407	lipoprotein	WP_009902687.1
gene-UAB	UAB_RS0211930	68.638	0.39014	0.299284	1.30358	0.192377	0.7407	endonuclease/exonuclease/phosphatase family protein	WP_003433980.1
gene-UAB	UAB_RS0215235	8088.01	-0.108319	0.0831665	-1.30243	0.192768	0.7407	murein biosynthesis integral membrane protein MurJ	WP_004454106.1
gene-UAB	UAB_RS0215970	248.322	0.222848	0.172634	1.29087	0.19675	0.7407	HAMP domain-containing histidine kinase	WP_003439799.1
gene-UAB	UAB_RS0216710	354.795	-0.233028	0.179364	-1.29919	0.193879	0.7407	glycoside hydrolase family 65 protein	WP_009903497.1
gene-UAB	UAB_RS0216735	71.3323	-0.405363	0.311802	-1.30007	0.193578	0.7407	PTS sugar transporter subunit IIA	WP_003440068.1
gene-UAB	UAB_RS0217970	77.7727	0.345938	0.268288	1.28943	0.197249	0.7407	hypothetical protein	WP_009903702.1
gene-UAB	UAB_RS0218800	11620.7	-0.114053	0.0884586	-1.28934	0.197281	0.7407	polysaccharide biosynthesis protein	WP_003425909.1
gene-UAB	UAB_RS0218900	15401.7	-0.137484	0.106225	-1.29427	0.195571	0.7407	UDP-N-acetylmuramate--L-alanine ligase	WP_003425936.1
gene-UAB	UAB_RS0219090	2092.9	-0.156775	0.121265	-1.29283	0.196068	0.7407	tRNA dihydrouridine synthase DusB	WP_003434962.1
gene-UAB	RS2000000221225	3094.54	-0.442103	0.341572	-1.29432	0.195556	0.7407	#N/A	#N/A
gene-UAB	RS2000000221395	3.28565	-1.77868	1.37754	-1.2912	0.196634	0.7407	#N/A	#N/A
gene-UAB	UAB_RS0200270	396395	-0.873406	0.67849	-1.28728	0.197997	0.741106	0	0
gene-UAB	UAB_RS0200495	13341.2	0.132987	0.103431	1.28575	0.198531	0.741106	ImmA/IrrE family metallo-endopeptidase	WP_009898403.1
gene-UAB	UAB_RS0204905	891.239	-0.157313	0.122424	-1.28498	0.198798	0.741106	0	WP_009888558.1
gene-UAB	UAB_RS0207035	58.0244	-0.375316	0.292662	-1.28242	0.199695	0.741106	excisionase	WP_006354939.1
gene-UAB	UAB_RS0207625	606.803	0.180896	0.141111	1.28194	0.199862	0.741106	DUF1700 domain-containing protein	WP_032512360.1
gene-UAB	UAB_RS0210605	743.125	-0.170323	0.132878	-1.2818	0.199912	0.741106	signal peptidase II	WP_009902829.1
gene-UAB	UAB_RS0211610	77.9856	-0.326113	0.253939	-1.28422	0.199066	0.741106	purine permease	WP_003430656.1
gene-UAB	UAB_RS0212445	223.393	0.217521	0.169146	1.286	0.198443	0.741106	S8 family peptidase	WP_003433821.1
gene-UAB	UAB_RS0214790	631.769	-0.168219	0.130617	-1.28788	0.197789	0.741106	DUF1232 domain-containing protein	WP_003427102.1
gene-UAB	UAB_RS0215675	4321.26	0.110435	0.0861148	1.28242	0.199697	0.741106	TldD/PmbA family protein	WP_009898040.1
gene-UAB	UAB_RS0217160	7775.1	-0.128957	0.10042	-1.28417	0.199081	0.741106	preprotein translocase subunit SecG	WP_003421948.1
gene-UAB	UAB_RS0217300	259.588	0.245464	0.191293	1.28318	0.199428	0.741106	ATP-binding protein	WP_009903621.1
gene-UAB	UAB_RS0206265	9.01169	-0.986468	0.77079	-1.27982	0.20061	0.742956	helix-turn-helix transcriptional regulator	WP_003438035.1
gene-UAB	UAB_RS0201965	315.193	0.209194	0.164819	1.26923	0.204359	0.743524	0	WP_003434477.1
gene-UAB	UAB_RS0202355	1155.84	0.195697	0.153998	1.27077	0.20381	0.743524	0	WP_003436064.1
gene-UAB	UAB_RS0202600	1116.07	-0.19048	0.149322	-1.27563	0.202087	0.743524	0	WP_009901763.1
gene-UAB	UAB_RS0204490	33.5005	0.521391	0.410083	1.27143	0.203576	0.743524	0	WP_003426890.1
gene-UAB	UAB_RS0204945	177304	0.136802	0.10762	1.27116	0.203672	0.743524	0	WP_009902143.1
gene-UAB	UAB_RS0208055	997.713	-0.134029	0.105474	-1.27073	0.203824	0.743524	MgtC/SapB family protein	WP_003429376.1
gene-UAB	UAB_RS0212125	9.25199	-1.04542	0.822482	-1.27106	0.203708	0.743524	hypothetical protein	WP_009903073.1
gene-UAB	UAB_RS0212790	231.831	0.276677	0.216469	1.27813	0.201202	0.743524	ATP-binding cassette domain-containing protein	WP_009893573.1
gene-UAB	UAB_RS0213750	16444.1	-0.125455	0.0985109	-1.27351	0.202837	0.743524	D-alanyl-D-alanine carboxypeptidase	WP_004454794.1
gene-UAB	UAB_RS0213925	2072.08	0.144403	0.113493	1.27235	0.203249	0.743524	hypothetical protein	WP_004454829.1
gene-UAB	UAB_RS0214765	1885.77	-0.134494	0.105517	-1.27463	0.202442	0.743524	NAD(P)/FAD-dependent oxidoreductase	WP_009897869.1
gene-UAB	UAB_RS0215955	398.796	0.195167	0.153097	1.2748	0.202381	0.743524	ABC transporter permease	WP_009903379.1
gene-UAB	UAB_RS0216420	1286.97	0.167788	0.132084	1.27032	0.203971	0.743524	restriction endonuclease subunit S	WP_009903440.1
gene-UAB	UAB_RS0216690	1734.24	-0.133746	0.1047	-1.27741	0.201457	0.743524	PTS glucose transporter subunit IIA	WP_009903489.1
gene-UAB	UAB_RS0217225	508.345	-0.184656	0.144973	-1.27373	0.20276	0.743524	putative aminohydrolase SsnA	WP_009903604.1
gene-UAB	UAB_RS0217400	264.873	0.215088	0.169395	1.26974	0.204176	0.743524	MarR family transcriptional regulator	WP_009903646.1
gene-UAB	UAB_RS0218055	2853.64	0.170523	0.133403	1.27826	0.201159	0.743524	NAD-dependent DNA ligase LigA	WP_009891779.1
gene-UAB	UAB_RS0218620	7563.93	0.113709	0.0891603	1.27534	0.20219	0.743524	alanine racemase	WP_009903781.1
gene-UAB	UAB_RS0202140	1001.12	0.163999	0.129338	1.26798	0.204804	0.744414	0	WP_009901702.1
gene-UAB	UAB_RS0203125	488395	0.118397	0.0935043	1.26621	0.205436	0.745985	0	WP_003417347.1
gene-UAB	UAB_RS0204110	902.567	-0.165738	0.131021	-1.26497	0.205883	0.746149	0	WP_003438861.1
gene-UAB	UAB_RS0208985	143.942	-0.317818	0.251137	-1.26551	0.205687	0.746149	phage holin family protein	WP_009889440.1
gene-UAB	UAB_RS0203850	1515.64	0.1449	0.114749	1.26275	0.206678	0.74696	0	WP_003425127.1
gene-UAB	UAB_RS0205370	102.596	-0.288005	0.228092	-1.26267	0.206708	0.74696	0	WP_009902196.1
gene-UAB	UAB_RS0206590	101.336	-0.352618	0.279196	-1.26298	0.206597	0.74696	amino acid permease	WP_009902299.1
gene-UAB	UAB_RS0201345	345.744	-0.314443	0.249202	-1.2618	0.207021	0.747225	0	0
gene-UAB	UAB_RS0204445	1495.28	0.161957	0.128681	1.25859	0.208177	0.747225	0	WP_009902076.1
gene-UAB	UAB_RS0205305	2828.63	0.206447	0.16405	1.25844	0.208233	0.747225	0	WP_009902188.1
gene-UAB	UAB_RS0209555	1041.11	-0.164373	0.13065	-1.25812	0.20835	0.747225	hypothetical protein	WP_009902704.1
gene-UAB	UAB_RS0210720	2213.4	-0.15386	0.122261	-1.25845	0.20823	0.747225	MarR family transcriptional regulator	WP_009889887.1
gene-UAB	UAB_RS0215650	57.0932	-0.527049	0.417859	-1.26131	0.207198	0.747225	DUF5058 family protein	WP_003426729.1
gene-UAB	UAB_RS0218750	3086.51	0.12835	0.102026	1.25801	0.208388	0.747225	UTP--glucose-1-phosphate uridylyltransferase GalU	WP_009892053.1
gene-UAB	UAB_RS0219650	14444	0.129734	0.102997	1.25959	0.207819	0.747225	DHH family phosphoesterase	WP_003429268.1
gene-UAB	UAB_RS0200155	38.4226	-0.455082	0.362109	-1.25675	0.208843	0.748138	DUF2577 domain-containing protein	WP_009901340.1
gene-UAB	UAB_RS0207275	375.378	-0.209205	0.166702	-1.25497	0.20949	0.749734	GNAT family N-acetyltransferase	WP_003438272.1
gene-UAB	UAB_RS0202805	179.561	0.263029	0.209945	1.25284	0.210262	0.751774	0	WP_009901782.1
gene-UAB	UAB_RS0203945	24582.7	0.114623	0.0916016	1.25132	0.210818	0.753038	0	WP_009902000.1
gene-UAB	UAB_RS0201830	89.7626	-0.407752	0.326302	-1.24962	0.21144	0.753091	0	WP_025992011.1
gene-UAB	UAB_RS0215365	574.241	-0.158444	0.126744	-1.25011	0.211258	0.753091	Holliday junction branch migration protein RuvA	WP_003426582.1
gene-UAB	UAB_RS0219190	29.0119	0.630216	0.504079	1.25023	0.211215	0.753091	hypothetical protein	WP_009903821.1
gene-UAB	UAB_RS0219750	10213.6	-0.113074	0.0907355	-1.24619	0.212694	0.756833	membrane protein insertase YidC	WP_003429300.1
gene-UAB	UAB_RS0211880	51839.1	-0.10918	0.0877125	-1.24475	0.213222	0.757448	elongation factor Ts	WP_003424535.1
gene-UAB	UAB_RS0215975	99.6126	0.303809	0.244099	1.24461	0.213274	0.757448	response regulator transcription factor	WP_003429090.1
gene-UAB	UAB_RS0206110	1829.35	0.120773	0.0971471	1.2432	0.213794	0.757849	0	WP_009896029.1
gene-UAB	UAB_RS0206465	3928.48	-0.127525	0.102575	-1.24323	0.213781	0.757849	YhbY family RNA-binding protein	WP_003428464.1
gene-UAB	UAB_RS0209265	1665.11	-0.142562	0.115227	-1.23723	0.216003	0.759319	MFS transporter	WP_009902660.1
gene-UAB	UAB_RS0209290	3700.93	0.120238	0.0971137	1.23812	0.215672	0.759319	sensor histidine kinase	WP_021378212.1
gene-UAB	UAB_RS0211520	834.282	0.148686	0.119834	1.24077	0.214691	0.759319	molybdopterin-dependent oxidoreductase	WP_009902982.1
gene-UAB	UAB_RS0213895	2022.52	-0.133381	0.107723	-1.23819	0.215647	0.759319	bis(5'-nucleosyl)-tetraphosphatase (symmetrical) YqeK	WP_003431048.1
gene-UAB	UAB_RS0214165	5637.36	-0.123762	0.100041	-1.23712	0.216042	0.759319	thiamine diphosphokinase	WP_004454892.1
gene-UAB	UAB_RS0216425	2154.69	0.137971	0.111651	1.23574	0.216557	0.759319	SAM-dependent DNA methyltransferase	WP_009903441.1
gene-UAB	UAB_RS0216645	1565.94	-0.115869	0.0937859	-1.23547	0.216657	0.759319	PRD domain-containing protein	WP_009891460.1
gene-UAB	UAB_RS0216670	848.768	-0.152998	0.123331	-1.24055	0.214773	0.759319	EFR1 family ferrodoxin	WP_009903486.1
gene-UAB	UAB_RS0217430	267.516	-0.229144	0.185235	-1.23705	0.21607	0.759319	AraC family transcriptional regulator	WP_009903649.1
gene-UAB	UAB_RS0218050	9057.13	0.128573	0.103757	1.23918	0.215278	0.759319	ribonuclease PH	WP_009903712.1
gene-UAB	UAB_RS0218085	920.286	0.207153	0.167594	1.23604	0.216444	0.759319	4Fe-4S dicluster domain-containing protein	WP_009891793.1
gene-UAB	UAB_RS0218205	2104.67	-0.14295	0.11547	-1.23799	0.21572	0.759319	MATE family efflux transporter	WP_009903725.1
gene-UAB	UAB_RS0209175	92.4628	-0.321222	0.26043	-1.23343	0.217415	0.760866	GIY-YIG nuclease family protein	WP_009889495.1
gene-UAB	RS2000000221205	1.79389	-2.61944	2.12413	-1.23318	0.217507	0.760866	#N/A	#N/A
gene-UAB	UAB_RS02000000219840	180601	-0.841757	0.691608	-1.2171	0.223566	0.761991	0	0
gene-UAB	UAB_RS02000000220105	1.52141	2.38552	1.94902	1.22396	0.220967	0.761991	0	WP_009901801.1
gene-UAB	UAB_RS0201475	1746.78	-0.147027	0.119752	-1.22776	0.219538	0.761991	0	WP_003432453.1
gene-UAB	UAB_RS0201800	7.67654	1.16806	0.957066	1.22046	0.222292	0.761991	0	WP_009901650.1
gene-UAB	UAB_RS0203105	258587	0.174891	0.143602	1.21788	0.223268	0.761991	0	WP_009901809.1
gene-UAB	UAB_RS0203595	146.15	0.286568	0.235069	1.21908	0.222814	0.761991	0	WP_009901960.1
gene-UAB	UAB_RS0204175	31.5961	0.506737	0.412755	1.2277	0.219561	0.761991	0	WP_003437661.1
gene-UAB	UAB_RS0205640	1712.44	0.130872	0.106471	1.22918	0.219003	0.761991	0	WP_003437122.1
gene-UAB	UAB_RS0206150	306.527	0.219433	0.180069	1.2186	0.222995	0.761991	0	WP_003418955.1
gene-UAB	UAB_RS0206310	2561.19	-0.179157	0.146862	-1.2199	0.222503	0.761991	VOC family protein	WP_003419037.1
gene-UAB	UAB_RS0207050	118.85	-0.272562	0.223725	-1.21829	0.223112	0.761991	hypothetical protein	WP_003433385.1
gene-UAB	UAB_RS0208655	16878.5	-0.152883	0.124313	-1.22982	0.218766	0.761991	Fic family protein	WP_003436700.1
gene-UAB	UAB_RS0210060	8672.66	-0.122632	0.10033	-1.22229	0.221598	0.761991	YjdF family protein	WP_004454369.1
gene-UAB	UAB_RS0210415	985.137	-0.134482	0.110176	-1.2206	0.222236	0.761991	response regulator transcription factor	WP_003439430.1
gene-UAB	UAB_RS0210795	23176.8	-0.134877	0.110866	-1.21658	0.223766	0.761991	acetyl-CoA carboxylase biotin carboxylase subunit	WP_003435334.1
gene-UAB	UAB_RS0211425	4062.75	-0.155646	0.127917	-1.21677	0.223692	0.761991	aspartate kinase	WP_003424287.1
gene-UAB	UAB_RS0212430	885.355	0.146345	0.119907	1.22049	0.222279	0.761991	GGDEF domain-containing protein	WP_009903107.1
gene-UAB	UAB_RS0213075	18861.7	-0.110782	0.0909677	-1.21782	0.223293	0.761991	permease	WP_004454664.1
gene-UAB	UAB_RS0213900	2790.07	-0.11515	0.0935293	-1.23117	0.218261	0.761991	nicotinate-nucleotide adenylyltransferase	WP_003416411.1
gene-UAB	UAB_RS0214285	1007.98	-0.147968	0.12087	-1.2242	0.220878	0.761991	signal peptidase II	WP_004454916.1
gene-UAB	UAB_RS0214900	1703.81	0.118585	0.0973376	1.21829	0.223115	0.761991	hypothetical protein	WP_004455025.1
gene-UAB	UAB_RS0215985	585.961	0.146093	0.119753	1.21996	0.222482	0.761991	ABC transporter ATP-binding protein	WP_009903384.1
gene-UAB	UAB_RS0216410	373.302	0.209684	0.17055	1.22946	0.2189	0.761991	nucleotidyltransferase domain-containing protein	WP_003439944.1
gene-UAB	UAB_RS0217005	3110.61	0.179399	0.146357	1.22576	0.22029	0.761991	restriction endonuclease subunit S	WP_003427601.1
gene-UAB	UAB_RS0217460	2765.2	-0.127252	0.104189	-1.22136	0.221951	0.761991	PIG-L family deacetylase	WP_009903655.1
gene-UAB	UAB_RS0217625	3373.12	0.159396	0.13021	1.22414	0.220898	0.761991	proline reductase-associated electron transfer protein PrdC	WP_003431873.1
gene-UAB	UAB_RS0218480	1573.44	0.144258	0.118087	1.22163	0.221849	0.761991	adenosylcobinamide-GDP ribazoletransferase	WP_003437766.1
gene-UAB	UAB_RS0219480	125.976	0.270161	0.221132	1.22172	0.221815	0.761991	PTS transporter subunit IIC	WP_003435758.1
gene-UAB	UAB_RS0219485	22.0323	0.607351	0.495459	1.22583	0.220261	0.761991	PTS sugar transporter subunit IIB	WP_003435756.1
gene-UAB	UAB_RS0211590	437.625	-0.159499	0.131277	-1.21498	0.224373	0.762734	molybdopterin-dependent oxidoreductase	WP_009902994.1
gene-UAB	UAB_RS0214380	976.079	-0.149637	0.123174	-1.21485	0.224424	0.762734	hypothetical protein	WP_009890831.1
gene-UAB	UAB_RS0215245	9945.93	-0.135133	0.111276	-1.21439	0.224599	0.762734	sugar transferase	WP_009891044.1
gene-UAB	UAB_RS0211445	2308.42	-0.140308	0.115637	-1.21335	0.224997	0.76339	hypothetical protein	WP_009890174.1
gene-UAB	UAB_RS0215455	2156.28	0.140969	0.116432	1.21074	0.225994	0.765123	hypothetical protein	WP_003436150.1
gene-UAB	UAB_RS0217150	65.1267	-0.397942	0.328768	-1.2104	0.226125	0.765123	VOC family protein	WP_009903594.1
gene-UAB	UAB_RS0218125	635.969	0.171987	0.142023	1.21099	0.225901	0.765123	prenyltransferase	WP_009903715.1
gene-UAB	UAB_RS0200075	56.5686	-0.437989	0.362349	-1.20875	0.226759	0.765568	baseplate J/gp47 family protein	WP_009901334.1
gene-UAB	UAB_RS0202400	423.32	0.164534	0.136071	1.20918	0.226594	0.765568	0	WP_009888052.1
gene-UAB	UAB_RS0203165	723.09	0.185908	0.153919	1.20783	0.227113	0.765568	0	WP_009901819.1
gene-UAB	UAB_RS0204585	740.898	0.165654	0.137201	1.20738	0.227285	0.765568	0	WP_003436804.1
gene-UAB	UAB_RS0208525	1645.17	-0.161001	0.133331	-1.20753	0.227228	0.765568	ferrous iron transport protein B	WP_003439379.1
gene-UAB	UAB_RS0211410	280.456	-0.200495	0.166474	-1.20436	0.228449	0.768611	AI-2E family transporter	WP_003435146.1
gene-UAB	UAB_RS0218325	20644.6	0.114714	0.0952794	1.20397	0.228601	0.768611	NADH-quinone oxidoreductase subunit NuoF	WP_003416938.1
gene-UAB	UAB_RS0219500	146.941	0.24611	0.20481	1.20165	0.2295	0.770939	MerR family transcriptional regulator	WP_003435749.1
gene-UAB	UAB_RS0216890	14.2307	-0.753586	0.628237	-1.19953	0.230324	0.773007	hypothetical protein	WP_009903532.1
gene-UAB	UAB_RS02000000220150	3599.08	-1.16231	0.976358	-1.19046	0.233867	0.773652	0	WP_003426234.1
gene-UAB	UAB_RS02000000220760	343.678	-0.21233	0.178904	-1.18684	0.235291	0.773652	hypothetical protein	WP_004454658.1
gene-UAB	UAB_RS0200250	5055.93	0.122215	0.102643	1.19069	0.233776	0.773652	RNA polymerase sigma factor RpoD/SigA	WP_009889336.1
gene-UAB	UAB_RS0200765	1152.04	-0.206541	0.172958	-1.19417	0.232412	0.773652	0	WP_009887752.1
gene-UAB	UAB_RS0201420	23793.6	-0.109067	0.0911291	-1.19684	0.231369	0.773652	0	WP_003420704.1
gene-UAB	UAB_RS0202290	50.9005	0.404405	0.339662	1.19061	0.233806	0.773652	0	WP_009901729.1
gene-UAB	UAB_RS0203760	754.952	0.175398	0.147092	1.19244	0.233089	0.773652	0	WP_009888332.1
gene-UAB	UAB_RS0204150	20.1508	0.601166	0.505743	1.18868	0.234566	0.773652	0	WP_009895631.1
gene-UAB	UAB_RS0205325	1314.63	0.136569	0.114315	1.19467	0.232215	0.773652	0	WP_004453624.1
gene-UAB	UAB_RS0207890	2434.45	-0.135601	0.114192	-1.18748	0.235038	0.773652	Gfo/Idh/MocA family oxidoreductase	WP_003438480.1
gene-UAB	UAB_RS0208095	100.589	-0.326086	0.274645	-1.1873	0.235109	0.773652	peroxiredoxin	WP_009902504.1
gene-UAB	UAB_RS0208775	139.04	0.269038	0.224753	1.19704	0.231292	0.773652	biosynthetic-type acetolactate synthase large subunit	WP_009902576.1
gene-UAB	UAB_RS0212575	2963.13	0.152381	0.127975	1.19071	0.233769	0.773652	DNA topoisomerase III	WP_009903124.1
gene-UAB	UAB_RS0213070	5968.71	-0.118457	0.0990804	-1.19557	0.231865	0.773652	hypothetical protein	WP_003416836.1
gene-UAB	UAB_RS0213145	4813.15	-0.138354	0.116132	-1.19135	0.233516	0.773652	4Fe-4S binding protein	WP_009903167.1
gene-UAB	UAB_RS0213250	40.6355	-0.473721	0.396996	-1.19327	0.232765	0.773652	manganese catalase family protein	WP_003416728.1
gene-UAB	UAB_RS0215000	400.947	-0.177918	0.149574	-1.1895	0.234244	0.773652	Na+/H+ antiporter NhaC	WP_009903314.1
gene-UAB	UAB_RS0215265	53722.7	0.108111	0.0907002	1.19196	0.233276	0.773652	cell wall-binding cysteine protease Cwp84	WP_009897948.1
gene-UAB	UAB_RS0217435	1761.53	0.15853	0.133536	1.18717	0.235162	0.773652	ABC transporter ATP-binding protein	WP_009903650.1
gene-UAB	UAB_RS0218195	503.733	-0.188707	0.158952	-1.18719	0.235152	0.773652	ABC-F family ATP-binding cassette domain-containing protein	WP_009903722.1
gene-UAB	UAB_RS0218420	3199.27	0.15522	0.130786	1.18683	0.235297	0.773652	cobalt-precorrin 5A hydrolase	WP_009903758.1
gene-UAB	UAB_RS0218655	50586.2	0.133778	0.112192	1.1924	0.233103	0.773652	F0F1 ATP synthase subunit alpha	WP_003421367.1
gene-UAB	UAB_RS0219640	21134.2	0.103213	0.0862869	1.19616	0.231633	0.773652	replicative DNA helicase	WP_003420541.1
gene-UAB	UAB_RS0208975	2.0519	2.20533	1.85935	1.18607	0.235593	0.773944	hypothetical protein	WP_009902617.1
gene-UAB	UAB_RS0201570	17871.8	0.162409	0.137161	1.18408	0.236381	0.775847	0	WP_009895216.1
gene-UAB	UAB_RS0219400	681.601	0.162948	0.137748	1.18294	0.236834	0.776647	staygreen family protein	WP_009892191.1
gene-UAB	UAB_RS0213745	16.8161	-0.655175	0.554183	-1.18224	0.237112	0.776875	competence protein ComEA	WP_009890711.1
gene-UAB	UAB_RS0211315	128.803	-0.271335	0.229844	-1.18052	0.237794	0.778112	N-acetyl-gamma-glutamyl-phosphate reductase	WP_009902952.1
gene-UAB	UAB_RS0214230	18762.5	0.127542	0.108065	1.18023	0.237907	0.778112	bifunctional phosphopantothenoylcysteine decarboxylase/phosphopantothenate--cysteine ligase CoaBC	WP_004454901.1
gene-UAB	UAB_RS0201755	4.96384	-1.51534	1.28466	-1.17956	0.238175	0.778303	0	WP_025992004.1
gene-UAB	UAB_RS0206430	7867.25	0.106094	0.0900394	1.17831	0.238675	0.779252	0	WP_003419074.1
gene-UAB	UAB_RS02000000220690	114.446	-0.291438	0.248675	-1.17197	0.241211	0.781123	hypothetical protein	WP_003424559.1
gene-UAB	UAB_RS0200325	58.8338	-0.406971	0.347403	-1.17147	0.241411	0.781123	hypothetical protein	WP_021359021.1
gene-UAB	UAB_RS0202780	135.249	0.310678	0.265212	1.17143	0.241425	0.781123	0	WP_003435920.1
gene-UAB	UAB_RS0205255	478.75	-0.210331	0.179921	-1.16902	0.242396	0.781123	0	WP_004454242.1
gene-UAB	UAB_RS0206670	1597.68	-0.184522	0.157811	-1.16926	0.2423	0.781123	polyprenyl synthetase family protein	WP_009888951.1
gene-UAB	UAB_RS0210020	124.645	0.253524	0.216126	1.17304	0.240781	0.781123	helix-turn-helix transcriptional regulator	WP_003423694.1
gene-UAB	UAB_RS0210615	26.2954	0.553342	0.472338	1.17149	0.2414	0.781123	recombinase family protein	WP_009902830.1
gene-UAB	UAB_RS0213495	19422.9	-0.122001	0.104345	-1.16921	0.242318	0.781123	histidine triad nucleotide-binding protein	WP_003430911.1
gene-UAB	UAB_RS0213660	1477.46	-0.160627	0.136845	-1.17378	0.240482	0.781123	tRNA threonylcarbamoyladenosine dehydratase	WP_004454770.1
gene-UAB	UAB_RS0214420	2366.65	0.116765	0.0998269	1.16968	0.242132	0.781123	hypothetical protein	WP_009903276.1
gene-UAB	UAB_RS0214635	6345.1	0.105589	0.0900642	1.17238	0.241046	0.781123	EAL domain-containing protein	WP_009897838.1
gene-UAB	UAB_RS0215790	46.1512	0.468809	0.400841	1.16956	0.242177	0.781123	ATP-binding cassette domain-containing protein	WP_009898064.1
gene-UAB	UAB_RS0218490	4538.14	0.147888	0.125859	1.17503	0.239981	0.781123	nicotinate-nucleotide--dimethylbenzimidazole phosphoribosyltransferase	WP_003437772.1
gene-UAB	UAB_RS0219345	420.843	-0.168424	0.143835	-1.17095	0.241618	0.781123	tRNA 2-thiocytidine biosynthesis protein TtcA	WP_009903833.1
gene-UAB	UAB_RS0219505	234.726	-0.270044	0.230409	-1.17202	0.24119	0.781123	hypothetical protein	WP_003435744.1
gene-UAB	UAB_RS0204890	2432.81	-0.111113	0.0952173	-1.16694	0.243234	0.782871	0	WP_003436959.1
gene-UAB	UAB_RS0218990	24.3647	0.572212	0.490481	1.16663	0.243359	0.782871	carbon-phosphorus lyase complex subunit PhnI	WP_009892103.1
gene-UAB	UAB_RS0204235	237.341	0.283835	0.244027	1.16313	0.244777	0.783666	0	WP_003436088.1
gene-UAB	UAB_RS0204340	244.332	-0.236917	0.203587	-1.16372	0.24454	0.783666	0	WP_009902060.1
gene-UAB	UAB_RS0207095	10.006	-0.799285	0.6875	-1.1626	0.244993	0.783666	hypothetical protein	WP_009892945.1
gene-UAB	UAB_RS0209990	7362.92	0.105836	0.0910511	1.16238	0.24508	0.783666	cell wall-binding cysteine protease Cwp13	WP_009902746.1
gene-UAB	UAB_RS0210050	315.012	0.201164	0.172883	1.16358	0.244593	0.783666	EFR1 family ferrodoxin	WP_004454372.1
gene-UAB	UAB_RS0211960	15288	0.0932123	0.0800134	1.16496	0.244036	0.783666	[FeFe] hydrogenase H-cluster radical SAM maturase HydE	WP_003433972.1
gene-UAB	UAB_RS0215980	1303.52	0.123761	0.106271	1.16457	0.244192	0.783666	aliphatic sulfonate ABC transporter substrate-binding protein	WP_003429089.1
gene-UAB	UAB_RS0203255	6.11292	-1.2118	1.04523	-1.15936	0.246309	0.7849	0	WP_009901854.1
gene-UAB	UAB_RS0207630	811.098	0.145847	0.125723	1.16007	0.246021	0.7849	DUF4097 family beta strand repeat protein	WP_009902421.1
gene-UAB	UAB_RS0215535	22.3917	0.559998	0.483014	1.15938	0.2463	0.7849	response regulator	WP_003436119.1
gene-UAB	UAB_RS0216170	22657.5	0.103819	0.0895204	1.15972	0.246162	0.7849	SIS domain-containing protein	WP_009903412.1
gene-UAB	UAB_RS0210360	3625.11	0.122626	0.105947	1.15743	0.247095	0.786057	4-hydroxy-3-methylbut-2-enyl diphosphate reductase	WP_003430325.1
gene-UAB	UAB_RS0212725	401.285	-0.184838	0.159678	-1.15756	0.247042	0.786057	hypothetical protein	WP_004454592.1
gene-UAB	UAB_RS0203225	38.0486	-0.433408	0.37468	-1.15674	0.247378	0.786286	0	WP_009901842.1
gene-UAB	UAB_RS0200605	909.686	-0.210987	0.182533	-1.15589	0.247728	0.786727	tape measure protein	WP_025991999.1
gene-UAB	UAB_RS0200985	1716.26	0.129901	0.112445	1.15524	0.247994	0.786899	0	WP_009895177.1
gene-UAB	UAB_RS0213225	4740.96	-0.122518	0.106213	-1.15351	0.2487	0.788467	flavin reductase	WP_004454695.1
gene-UAB	UAB_RS0205115	5854.18	0.110642	0.0960287	1.15217	0.249249	0.789119	0	WP_003437535.1
gene-UAB	UAB_RS0208515	49.2442	-0.45069	0.391575	-1.15097	0.249746	0.789119	hypothetical protein	WP_009889354.1
gene-UAB	UAB_RS0209710	237.5	0.242803	0.210922	1.15116	0.249668	0.789119	riboflavin synthase	WP_009889593.1
gene-UAB	UAB_RS0210310	114.217	-0.275555	0.239416	-1.15095	0.249753	0.789119	hypothetical protein	WP_003423835.1
gene-UAB	UAB_RS0203520	987.292	0.170409	0.148218	1.14972	0.25026	0.789379	0	WP_009901939.1
gene-UAB	UAB_RS0205635	34.0262	-0.51487	0.447636	-1.1502	0.250062	0.789379	0	WP_003437125.1
gene-UAB	UAB_RS0208615	7179.51	-0.131217	0.114199	-1.14902	0.250548	0.78962	sulfurtransferase	WP_009902555.1
gene-UAB	UAB_RS0218485	1097.56	0.172747	0.150588	1.14714	0.251322	0.791388	bifunctional adenosylcobinamide kinase/adenosylcobinamide-phosphate guanylyltransferase	WP_009891982.1
gene-UAB	UAB_RS0202680	1095.87	0.146438	0.12792	1.14476	0.25231	0.791447	0	WP_009888123.1
gene-UAB	UAB_RS0203635	45.1445	-0.426934	0.37283	-1.14512	0.25216	0.791447	0	WP_003434804.1
gene-UAB	UAB_RS0206040	40248.5	0.158455	0.138251	1.14614	0.251736	0.791447	0	WP_009888868.1
gene-UAB	UAB_RS0214470	4507.88	-0.12047	0.105304	-1.14402	0.252617	0.791447	NAD(P)H-dependent glycerol-3-phosphate dehydrogenase	WP_003426955.1
gene-UAB	UAB_RS0217410	113.497	0.305501	0.26657	1.14604	0.251778	0.791447	flavodoxin family protein	WP_003438770.1
gene-UAB	UAB_RS0219070	44.6424	0.412977	0.360908	1.14427	0.252511	0.791447	DUF378 domain-containing protein	WP_003427633.1
gene-UAB	UAB_RS0201695	1178.21	-0.171602	0.150208	-1.14243	0.253277	0.792849	0	WP_009901626.1
gene-UAB	UAB_RS0209495	253.228	-0.229192	0.200748	-1.14169	0.253584	0.793143	glycerophosphodiester phosphodiesterase	WP_009902694.1
gene-UAB	UAB_RS0215100	148.655	-0.243354	0.213462	-1.14003	0.254272	0.793295	hypothetical protein	WP_009891012.1
gene-UAB	UAB_RS0215410	1278.29	0.14514	0.127267	1.14044	0.254104	0.793295	hypothetical protein	WP_004454071.1
gene-UAB	UAB_RS0216400	3207.78	0.133752	0.117243	1.14081	0.25395	0.793295	DEAD/DEAH box helicase family protein	WP_009903438.1
gene-UAB	UAB_RS0200205	363.688	0.271411	0.239853	1.13157	0.257814	0.795946	phage scaffolding protein	WP_032512327.1
gene-UAB	UAB_RS0202540	1579.02	0.184115	0.162259	1.13469	0.256504	0.795946	0	WP_009901752.1
gene-UAB	UAB_RS0203900	2248.68	0.111126	0.0981608	1.13208	0.257601	0.795946	0	WP_003438993.1
gene-UAB	UAB_RS0205395	428.143	-0.177584	0.156508	-1.13466	0.256518	0.795946	0	WP_004453603.1
gene-UAB	UAB_RS0208080	19.804	-0.585489	0.517468	-1.13145	0.257865	0.795946	delta-lactam-biosynthetic de-N-acetylase	WP_003438596.1
gene-UAB	UAB_RS0208470	477.969	-0.175309	0.154868	-1.13199	0.257639	0.795946	4Fe-4S binding protein	WP_009902541.1
gene-UAB	UAB_RS0209335	9685.99	0.110817	0.0978818	1.13215	0.25757	0.795946	TerD family protein	WP_003420269.1
gene-UAB	UAB_RS0213565	7602.02	0.121829	0.107404	1.13431	0.256665	0.795946	molecular chaperone DnaJ	WP_004454751.1
gene-UAB	UAB_RS0213765	2101.5	-0.127075	0.1122	-1.13258	0.257391	0.795946	argininosuccinate lyase	WP_009897688.1
gene-UAB	UAB_RS0214955	4337.77	-0.094203	0.082963	-1.13548	0.256173	0.795946	UDP-N-acetylglucosamine--N-acetylmuramyl-(pentapeptide) pyrophosphoryl-UDP N-acetylglucosamine transferase	WP_004454156.1
gene-UAB	UAB_RS0216060	4206.14	0.106177	0.0933902	1.13692	0.255572	0.795946	IclR family transcriptional regulator	WP_003439844.1
gene-UAB	UAB_RS0217480	4320.48	-0.145135	0.128113	-1.13287	0.257269	0.795946	N-acetyldiaminopimelate deacetylase	WP_003438795.1
gene-UAB	UAB_RS0217890	94.9273	0.317921	0.281007	1.13136	0.257902	0.795946	PTS system mannose/fructose/sorbose family transporter subunit IID	WP_003432375.1
gene-UAB	UAB_RS0210825	11567.8	-0.166968	0.147919	-1.12878	0.258991	0.796008	hypothetical protein	WP_003424083.1
gene-UAB	UAB_RS0213810	5908.03	-0.116292	0.102992	-1.12913	0.258841	0.796008	6-phospho-alpha-glucosidase	WP_009897699.1
gene-UAB	UAB_RS0216135	318.669	0.201293	0.178152	1.1299	0.25852	0.796008	DUF1848 domain-containing protein	WP_009903403.1
gene-UAB	UAB_RS0217600	5668	0.373759	0.330897	1.12953	0.258674	0.796008	hypothetical protein	WP_003422102.1
gene-UAB	UAB_RS0217705	72.4573	0.349902	0.309742	1.12966	0.258621	0.796008	phosphate ABC transporter permease subunit PstC	WP_009903680.1
gene-UAB	UAB_RS0209020	4206.3	0.197659	0.175277	1.12769	0.25945	0.796103	thioredoxin domain-containing protein	WP_009902622.1
gene-UAB	UAB_RS0216725	119.259	0.252511	0.223906	1.12776	0.259423	0.796103	PTS sugar transporter subunit IIA	WP_003431315.1
gene-UAB	UAB_RS02000000220015	20.1966	-0.647856	0.575918	-1.12491	0.260627	0.797742	0	WP_032512341.1
gene-UAB	UAB_RS0215920	412.873	0.209557	0.186287	1.12491	0.260627	0.797742	CRISPR-associated protein Cas4	WP_021359714.1
gene-UAB	UAB_RS0218585	743.308	0.165093	0.146646	1.12579	0.260255	0.797742	5-formyltetrahydrofolate cyclo-ligase	WP_009892015.1
gene-UAB	UAB_RS0211850	1391.81	-0.134928	0.120097	-1.12349	0.261229	0.798272	bifunctional diguanylate cyclase/phosphodiesterase	WP_009903035.1
gene-UAB	UAB_RS0216505	533.617	0.173951	0.154784	1.12383	0.261085	0.798272	GntR family transcriptional regulator	WP_003439979.1
gene-UAB	UAB_RS0202425	146.595	0.280233	0.249791	1.12187	0.261917	0.799716	0	WP_021358782.1
gene-UAB	UAB_RS0200295	247.55	-0.238959	0.213803	-1.11766	0.263712	0.800504	hypothetical protein	WP_009901440.1
gene-UAB	UAB_RS0201555	127.481	0.226429	0.202165	1.12002	0.262704	0.800504	0	WP_009901603.1
gene-UAB	UAB_RS0202525	898.632	0.16699	0.149116	1.11987	0.262771	0.800504	0	WP_009901748.1
gene-UAB	UAB_RS0202625	1127.95	-0.190096	0.169927	-1.11869	0.263271	0.800504	0	WP_003435967.1
gene-UAB	UAB_RS0202875	628.355	0.167278	0.149935	1.11567	0.264563	0.800504	0	WP_003434209.1
gene-UAB	UAB_RS0203290	77.0454	0.30749	0.274858	1.11872	0.263258	0.800504	0	WP_009901875.1
gene-UAB	UAB_RS0205940	560.227	0.138924	0.124541	1.1155	0.264638	0.800504	0	WP_003428590.1
gene-UAB	UAB_RS0207030	57.777	-0.383855	0.344302	-1.11488	0.264902	0.800504	0	WP_009902368.1
gene-UAB	UAB_RS0208990	1382.3	-0.127632	0.114562	-1.11408	0.265243	0.800504	Abi family protein	WP_003429958.1
gene-UAB	UAB_RS0209825	1968.85	0.151253	0.135306	1.11786	0.263627	0.800504	1-acyl-sn-glycerol-3-phosphate acyltransferase	WP_004454428.1
gene-UAB	UAB_RS0212560	1057.59	0.130307	0.117002	1.11372	0.265401	0.800504	tyrosine-protein phosphatase	WP_009890462.1
gene-UAB	UAB_RS0214095	3012.75	0.0999923	0.0894225	1.1182	0.263481	0.800504	Asp23/Gls24 family envelope stress response protein	WP_003431114.1
gene-UAB	UAB_RS0214875	1672.84	0.119471	0.107116	1.11534	0.264705	0.800504	LysR family transcriptional regulator	WP_009890955.1
gene-UAB	UAB_RS0215990	308.027	-0.163305	0.146628	-1.11373	0.265394	0.800504	ABC transporter permease	WP_009903386.1
gene-UAB	UAB_RS0219705	12361.2	0.106192	0.0950828	1.11684	0.264063	0.800504	GerMN domain-containing protein	WP_009903853.1
gene-UAB	UAB_RS0215670	59.19	0.355652	0.319484	1.11321	0.265619	0.800514	manganese catalase family protein	WP_003439611.1
gene-UAB	UAB_RS02000000220550	1.14888	2.69111	2.4205	1.1118	0.266224	0.801687	hypothetical protein	WP_003435444.1
gene-UAB	UAB_RS0212345	4212.79	-0.101316	0.0912524	-1.11028	0.266877	0.802356	radical SAM protein	WP_003433836.1
gene-UAB	UAB_RS0214785	37078	-0.102769	0.0925571	-1.11033	0.266857	0.802356	dicarboxylate/amino acid:cation symporter	WP_009893711.1
gene-UAB	UAB_RS0202665	308.469	-0.180477	0.162927	-1.10771	0.267985	0.803812	0	WP_009901772.1
gene-UAB	UAB_RS0206375	4824.98	0.151212	0.136656	1.10652	0.268503	0.803812	0	WP_003438053.1
gene-UAB	UAB_RS0208700	234.809	0.236535	0.213377	1.10853	0.267631	0.803812	imidazoleglycerol-phosphate dehydratase HisB	WP_009902569.1
gene-UAB	UAB_RS0210255	1043.04	0.134684	0.121813	1.10566	0.268873	0.803812	hypothetical protein	WP_009902773.1
gene-UAB	UAB_RS0212540	1115.55	0.127809	0.115471	1.10685	0.26836	0.803812	FAD-dependent oxidoreductase	WP_009903120.1
gene-UAB	UAB_RS0215175	5517.77	-0.114917	0.103924	-1.10577	0.268824	0.803812	polysaccharide biosynthesis protein	WP_009897930.1
gene-UAB	UAB_RS0218700	8099.96	-0.0938012	0.0847212	-1.10717	0.268218	0.803812	uracil phosphoribosyltransferase	WP_003437840.1
gene-UAB	UAB_RS0218705	3543.54	-0.111409	0.100808	-1.10516	0.269089	0.803812	ribose 5-phosphate isomerase B	WP_003437841.1
gene-UAB	UAB_RS02000000220115	1102.96	0.13679	0.124191	1.10145	0.270699	0.804084	0	WP_198133116.1
gene-UAB	UAB_RS0201210	2444.71	-0.203835	0.184891	-1.10246	0.27026	0.804084	0	WP_003421137.1
gene-UAB	UAB_RS0202675	163.456	0.237212	0.215125	1.10267	0.27017	0.804084	0	WP_003425177.1
gene-UAB	UAB_RS0202915	26704.8	-0.126963	0.115359	-1.10059	0.271073	0.804084	0	WP_009895392.1
gene-UAB	UAB_RS0203150	753.584	0.15874	0.144247	1.10048	0.271125	0.804084	0	WP_009901815.1
gene-UAB	UAB_RS0208730	1532.69	-0.121229	0.109854	-1.10354	0.269791	0.804084	polysaccharide deacetylase	WP_009902571.1
gene-UAB	UAB_RS0213975	877.544	0.125646	0.114073	1.10145	0.270701	0.804084	DUF4846 domain-containing protein	WP_009903242.1
gene-UAB	UAB_RS0215425	2180.08	-0.106747	0.0968425	-1.10227	0.270344	0.804084	ABC transporter ATP-binding protein	WP_009897981.1
gene-UAB	UAB_RS0219470	89.5873	0.31399	0.284865	1.10224	0.270358	0.804084	4-hydroxy-tetrahydrodipicolinate synthase	WP_003435760.1
gene-UAB	UAB_RS0204090	765.392	0.150913	0.137504	1.09752	0.272414	0.80552	0	WP_009902015.1
gene-UAB	UAB_RS0206075	3.62833	-1.80927	1.64871	-1.09738	0.272475	0.80552	0	WP_003428556.1
gene-UAB	UAB_RS0213370	17.0202	-0.665578	0.606032	-1.09826	0.272093	0.80552	bifunctional enoyl-CoA hydratase/phosphate acetyltransferase	WP_004454723.1
gene-UAB	UAB_RS0217935	35817.3	0.0965074	0.0878557	1.09848	0.271997	0.80552	glucose-6-phosphate isomerase	WP_003435635.1
gene-UAB	UAB_RS0201370	30159.7	0.116404	0.106309	1.09495	0.273537	0.805785	0	WP_009901578.1
gene-UAB	UAB_RS0205195	9566.07	0.103299	0.0942906	1.09553	0.273283	0.805785	0	WP_003437567.1
gene-UAB	UAB_RS0217750	18.9144	-0.663188	0.605815	-1.0947	0.273646	0.805785	YqaJ viral recombinase family protein	WP_102818051.1
gene-UAB	UAB_RS0219275	3152.74	0.106368	0.0970838	1.09563	0.27324	0.805785	glutamine-hydrolyzing carbamoyl-phosphate synthase small subunit	WP_009903827.1
gene-UAB	UAB_RS0219385	1043.21	-0.197287	0.180135	-1.09522	0.273422	0.805785	hypothetical protein	WP_003420681.1
gene-UAB	UAB_RS02000000220730	20859.2	-0.161184	0.147737	-1.09102	0.275264	0.806103	hypothetical protein	WP_004454589.1
gene-UAB	UAB_RS0200750	7404.56	-0.120226	0.109959	-1.09337	0.27423	0.806103	0	WP_009901537.1
gene-UAB	UAB_RS0204670	752.961	0.157185	0.144138	1.09051	0.275487	0.806103	0	WP_009902109.1
gene-UAB	UAB_RS0205760	540.79	-0.134119	0.122872	-1.09154	0.275036	0.806103	0	WP_003437060.1
gene-UAB	UAB_RS0207305	937.159	0.167417	0.153123	1.09335	0.27424	0.806103	IreB family regulatory phosphoprotein	WP_003419418.1
gene-UAB	UAB_RS0209375	2533.93	-0.131348	0.120206	-1.09269	0.274529	0.806103	cysteine protease StiP family protein	WP_009902680.1
gene-UAB	UAB_RS0211375	447.191	-0.163848	0.150247	-1.09053	0.275481	0.806103	helix-turn-helix transcriptional regulator	WP_009902968.1
gene-UAB	RS2000000221705	728.573	-0.155558	0.142542	-1.09132	0.275134	0.806103	#N/A	#N/A
gene-UAB	UAB_RS0218795	17794.5	-0.084628	0.0776684	-1.08961	0.275887	0.806638	nucleoside triphosphate pyrophosphohydrolase	WP_009903796.1
gene-UAB	UAB_RS02000000219855	1181.38	-0.127961	0.117783	-1.08641	0.277297	0.807501	hypothetical protein	WP_009901354.1
gene-UAB	UAB_RS0203465	33028	0.101456	0.0933415	1.08694	0.277065	0.807501	0	WP_009901921.1
gene-UAB	UAB_RS0211635	376.54	0.175432	0.161383	1.08705	0.277015	0.807501	WYL domain-containing protein	WP_009893441.1
gene-UAB	UAB_RS0213230	2084.41	0.118733	0.10924	1.0869	0.277083	0.807501	exonuclease domain-containing protein	WP_009903183.1
gene-UAB	UAB_RS0218310	1372.71	-0.182682	0.168258	-1.08572	0.277602	0.807501	formate/nitrite transporter family protein	WP_003429111.1
gene-UAB	UAB_RS0219185	265.128	-0.186422	0.171484	-1.08711	0.276988	0.807501	UPF0489 family protein	WP_003434933.1
gene-UAB	UAB_RS0219350	2404.91	-0.151511	0.139577	-1.0855	0.277701	0.807501	metallophosphoesterase	WP_009903835.1
gene-UAB	UAB_RS0216460	51.3574	-0.345287	0.31877	-1.08319	0.278726	0.809849	PTS sugar transporter subunit IIC	WP_050396626.1
gene-UAB	UAB_RS0202370	13213.2	0.12401	0.114546	1.08262	0.278978	0.809949	0	WP_009901735.1
gene-UAB	UAB_RS0207425	1501.32	-0.118954	0.109967	-1.08173	0.279372	0.810463	ribosome maturation factor RimP	WP_003438303.1
gene-UAB	UAB_RS0202325	3030.85	-0.159817	0.147881	-1.08071	0.279825	0.811143	0	WP_003435058.1
gene-UAB	UAB_RS0202895	1399.94	0.104347	0.096825	1.07769	0.281173	0.811557	0	WP_003434204.1
gene-UAB	UAB_RS0203880	2419.88	0.184114	0.170539	1.0796	0.28032	0.811557	0	WP_003438990.1
gene-UAB	UAB_RS0206595	1474.51	-0.143593	0.1331	-1.07884	0.280659	0.811557	0	WP_003428430.1
gene-UAB	UAB_RS0207165	1481.35	-0.130555	0.12137	-1.07568	0.282072	0.811557	0	WP_009889030.1
gene-UAB	UAB_RS0209505	27.993	-0.528193	0.492075	-1.0734	0.283092	0.811557	membrane protein	WP_009902695.1
gene-UAB	UAB_RS0210230	730.771	-0.139848	0.129857	-1.07694	0.281508	0.811557	4Fe-4S-binding domain protein	WP_003430299.1
gene-UAB	UAB_RS0211970	5682.33	0.0959471	0.0892732	1.07476	0.282483	0.811557	hypothetical protein	WP_003433970.1
gene-UAB	UAB_RS0212805	257.048	0.19273	0.179606	1.07307	0.283238	0.811557	response regulator transcription factor	WP_004454617.1
gene-UAB	UAB_RS0213930	349.792	-0.177182	0.164428	-1.07757	0.281227	0.811557	antibiotic biosynthesis monooxygenase	WP_003431059.1
gene-UAB	UAB_RS0214360	40952	0.0885061	0.0824518	1.07343	0.283079	0.811557	amino acid permease	WP_003426910.1
gene-UAB	UAB_RS0215660	516.724	0.165457	0.153873	1.07528	0.282248	0.811557	sigma 54-interacting transcriptional regulator	WP_009903347.1
gene-UAB	UAB_RS0216130	27664.3	-0.114989	0.106818	-1.07649	0.281709	0.811557	TDT family transporter	WP_009903401.1
gene-UAB	UAB_RS0216350	433.5	0.145553	0.13527	1.07602	0.281919	0.811557	xylulokinase	WP_003431356.1
gene-UAB	UAB_RS0218210	125.408	-0.256064	0.238493	-1.07367	0.282969	0.811557	ABC-2 family transporter protein	WP_021359900.1
gene-UAB	UAB_RS0218965	69.8779	-0.292101	0.271859	-1.07445	0.282619	0.811557	PHP domain-containing protein	WP_009894043.1
gene-UAB	UAB_RS0205090	4134.82	-0.117019	0.10929	-1.07072	0.284295	0.813766	0	WP_003437523.1
gene-UAB	UAB_RS0205895	71.9848	0.385197	0.359868	1.07038	0.284447	0.813766	0	WP_009902233.1
gene-UAB	UAB_RS0215140	355.311	-0.163233	0.152629	-1.06947	0.284856	0.814313	di-trans,poly-cis-decaprenylcistransferase	WP_003422884.1
gene-UAB	UAB_RS0200235	3.02243	-1.44309	1.35596	-1.06426	0.287212	0.814371	DUF2577 domain-containing protein	WP_009901352.1
gene-UAB	UAB_RS0201855	32.0562	-0.473287	0.443801	-1.06644	0.286225	0.814371	0	WP_009901665.1
gene-UAB	UAB_RS0202005	4706.21	0.135167	0.127486	1.06024	0.289034	0.814371	0	WP_009888020.1
gene-UAB	UAB_RS0202040	11789.6	-0.0986549	0.0927235	-1.06397	0.287343	0.814371	0	WP_003434503.1
gene-UAB	UAB_RS0203075	248.711	-0.181173	0.170822	-1.06059	0.288874	0.814371	0	WP_009901803.1
gene-UAB	UAB_RS0203765	1596.73	0.126971	0.119311	1.06421	0.287235	0.814371	0	WP_009895564.1
gene-UAB	UAB_RS0204055	160.279	-0.209399	0.196393	-1.06622	0.286324	0.814371	0	WP_003438914.1
gene-UAB	UAB_RS0206240	1542.58	-0.117581	0.1106	-1.06312	0.287728	0.814371	0	WP_003428523.1
gene-UAB	UAB_RS0207325	18615.4	0.127575	0.11964	1.06633	0.286277	0.814371	0	WP_003419428.1
gene-UAB	UAB_RS0207550	4835.64	-0.124116	0.116956	-1.06121	0.288593	0.814371	signal peptidase I	WP_009902411.1
gene-UAB	UAB_RS0207650	189.215	-0.197859	0.185162	-1.06858	0.285261	0.814371	lantibiotic immunity ABC transporter MutG family permease subunit	WP_009902423.1
gene-UAB	UAB_RS0207815	1044.99	0.152733	0.143791	1.06219	0.288151	0.814371	MFS transporter	WP_009896283.1
gene-UAB	UAB_RS0208030	1450.15	-0.135924	0.127651	-1.06481	0.286962	0.814371	GGDEF domain-containing protein	WP_009902498.1
gene-UAB	UAB_RS0209615	258.215	0.208739	0.196481	1.06239	0.288061	0.814371	FMN-binding protein	WP_004454481.1
gene-UAB	UAB_RS0211310	92.4767	-0.282326	0.264821	-1.0661	0.286379	0.814371	bifunctional glutamate N-acetyltransferase/amino-acid acetyltransferase ArgJ	WP_003435168.1
gene-UAB	UAB_RS0212490	3028.94	-0.104405	0.0980001	-1.06535	0.286717	0.814371	hypothetical protein	WP_003440234.1
gene-UAB	UAB_RS0213800	4586.38	-0.0911666	0.085504	-1.06623	0.286321	0.814371	transglutaminase domain-containing protein	WP_004454804.1
gene-UAB	UAB_RS0214295	6.76152	-1.04995	0.989271	-1.06134	0.288538	0.814371	TraR/DksA C4-type zinc finger protein	WP_009903274.1
gene-UAB	UAB_RS0214585	7355.01	-0.0976118	0.0919995	-1.061	0.288688	0.814371	UDP-N-acetylmuramoyl-L-alanine--D-glutamate ligase	WP_004454967.1
gene-UAB	UAB_RS0200980	936.046	0.134854	0.12739	1.05859	0.289785	0.815162	0	WP_009901562.1
gene-UAB	UAB_RS0206085	12.9101	-0.722575	0.684012	-1.05638	0.290796	0.815162	0	WP_009896025.1
gene-UAB	UAB_RS0208520	654.035	-0.164512	0.155749	-1.05626	0.290848	0.815162	MerR family transcriptional regulator	WP_009893097.1
gene-UAB	UAB_RS0211985	86.8856	-0.264934	0.250688	-1.05683	0.29059	0.815162	VanZ family protein	WP_009897306.1
gene-UAB	UAB_RS0215860	1822.62	-0.121714	0.115212	-1.05644	0.290767	0.815162	EAL domain-containing protein	WP_003439757.1
gene-UAB	UAB_RS0216585	145.678	-0.231178	0.218746	-1.05684	0.290586	0.815162	iron-containing alcohol dehydrogenase	WP_003440005.1
gene-UAB	UAB_RS0218840	1835.81	0.140728	0.132949	1.05851	0.289822	0.815162	hypothetical protein	WP_009903803.1
gene-UAB	UAB_RS0214565	1105.39	0.120692	0.114318	1.05576	0.291077	0.81519	DUF881 domain-containing protein	WP_004454964.1
gene-UAB	UAB_RS0212590	18.2969	-0.765315	0.725693	-1.0546	0.291609	0.816067	L-ribulose-5-phosphate 4-epimerase	WP_009897453.1
gene-UAB	UAB_RS0214000	1706.86	-0.134459	0.127651	-1.05333	0.292189	0.816727	MBOAT family protein	WP_009903247.1
gene-UAB	UAB_RS0214645	7127.03	-0.126131	0.119768	-1.05312	0.292284	0.816727	AraC family transcriptional regulator	WP_009897841.1
gene-UAB	UAB_RS0201535	320.58	0.148424	0.141163	1.05144	0.293059	0.817664	0	WP_009901597.1
gene-UAB	UAB_RS0206930	12.8898	-0.663306	0.63062	-1.05183	0.292877	0.817664	0	WP_009902341.1
gene-UAB	UAB_RS0213290	8.45253	-0.95788	0.912061	-1.05024	0.293609	0.817694	zinc ribbon domain-containing protein	WP_009890610.1
gene-UAB	UAB_RS0215945	378.703	0.17817	0.169689	1.04998	0.293728	0.817694	CRISPR-associated endoribonuclease Cas6	WP_009903374.1
gene-UAB	UAB_RS0216205	1174.86	0.120172	0.114377	1.05066	0.293414	0.817694	PhzF family phenazine biosynthesis protein	WP_009903417.1
gene-UAB	UAB_RS0214160	1470.58	0.139307	0.133083	1.04677	0.295206	0.821193	HAD family hydrolase	WP_009903260.1
gene-UAB	UAB_RS0215130	1566.5	0.116923	0.111751	1.04629	0.295429	0.821199	EAL domain-containing protein	WP_004454122.1
gene-UAB	UAB_RS0213120	2794.95	-0.103941	0.0994721	-1.04492	0.296059	0.821725	AI-2E family transporter	WP_003430799.1
gene-UAB	UAB_RS0218970	44.2117	-0.385643	0.368934	-1.04529	0.295889	0.821725	alpha-D-ribose 1-methylphosphonate 5-triphosphate diphosphatase	WP_009898738.1
gene-UAB	UAB_RS0202595	2700.01	-0.127864	0.122706	-1.04204	0.297393	0.82254	0	WP_009901762.1
gene-UAB	UAB_RS0203615	23.7719	-0.465795	0.447677	-1.04047	0.298121	0.82254	0	WP_009901963.1
gene-UAB	UAB_RS0204415	320.629	0.197677	0.189939	1.04074	0.297995	0.82254	0	WP_009888450.1
gene-UAB	UAB_RS0206105	1461.39	-0.119988	0.115047	-1.04295	0.296972	0.82254	0	WP_009896027.1
gene-UAB	UAB_RS0212145	1064.49	0.17017	0.163212	1.04263	0.297119	0.82254	alpha-glycosidase	WP_009897348.1
gene-UAB	UAB_RS0216480	201.133	0.207805	0.199609	1.04106	0.297849	0.82254	mannosylglycerate hydrolase	WP_009903451.1
gene-UAB	UAB_RS0217055	2377.68	0.113687	0.109203	1.04106	0.297847	0.82254	hypothetical protein	WP_009903579.1
gene-UAB	UAB_RS0218635	693.901	0.130813	0.125432	1.0429	0.296996	0.82254	holo-ACP synthase	WP_009903784.1
gene-UAB	UAB_RS0201025	4214.98	0.100425	0.0972889	1.03224	0.30196	0.822637	0	WP_003421197.1
gene-UAB	UAB_RS0201135	55305.7	-0.16327	0.15816	-1.03231	0.301927	0.822637	0	WP_003421168.1
gene-UAB	UAB_RS0201425	4072.46	-0.137951	0.133122	-1.03628	0.300073	0.822637	0	WP_003420706.1
gene-UAB	UAB_RS0202265	368.065	-0.164275	0.158479	-1.03657	0.299935	0.822637	0	WP_009901725.1
gene-UAB	UAB_RS0202755	139.869	0.227376	0.219915	1.03393	0.30117	0.822637	0	WP_009901778.1
gene-UAB	UAB_RS0206680	7011.33	0.116844	0.112756	1.03625	0.300084	0.822637	0	WP_009902302.1
gene-UAB	UAB_RS0207160	419.545	-0.191195	0.184328	-1.03726	0.299617	0.822637	0	WP_003419342.1
gene-UAB	UAB_RS0207695	764.3	0.135745	0.131126	1.03523	0.300563	0.822637	0	WP_009896255.1
gene-UAB	UAB_RS0209725	194.451	0.196054	0.188715	1.03889	0.298856	0.822637	phosphomethylpyrimidine synthase ThiC	WP_009889633.1
gene-UAB	UAB_RS0210485	13.3401	-0.614864	0.59355	-1.03591	0.300245	0.822637	pyridoxamine 5'-phosphate oxidase family protein	WP_009902807.1
gene-UAB	UAB_RS0211110	5301.1	-0.126174	0.121972	-1.03445	0.300924	0.822637	carboxymuconolactone decarboxylase family protein	WP_003428889.1
gene-UAB	UAB_RS0211790	4188.75	-0.0867524	0.0837272	-1.03613	0.300141	0.822637	sel1 repeat family protein	WP_003434025.1
gene-UAB	UAB_RS0214145	1114.16	0.112743	0.109252	1.03195	0.302095	0.822637	HAMP domain-containing histidine kinase	WP_009903259.1
gene-UAB	UAB_RS0214490	7.3299	0.862913	0.836265	1.03187	0.302135	0.822637	hypothetical protein	WP_004454951.1
gene-UAB	UAB_RS0215395	62.7127	0.350306	0.33803	1.03631	0.300055	0.822637	gluconate permease	WP_004454077.1
gene-UAB	UAB_RS0215875	579.74	0.157134	0.151699	1.03582	0.300285	0.822637	dipicolinate synthase subunit B	WP_003429956.1
gene-UAB	UAB_RS0215960	71.5699	0.344007	0.332993	1.03308	0.301568	0.822637	ABC transporter ATP-binding protein	WP_009903381.1
gene-UAB	UAB_RS0218235	127.815	-0.289204	0.280264	-1.0319	0.30212	0.822637	hypothetical protein	WP_009903730.1
gene-UAB	UAB_RS0202200	7.23923	1.04001	1.00942	1.03031	0.302866	0.823802	0	WP_009901713.1
gene-UAB	UAB_RS0214880	1382	-0.128792	0.12504	-1.03001	0.303005	0.823802	DUF3800 domain-containing protein	WP_004455022.1
gene-UAB	UAB_RS0210545	143.962	0.236966	0.230265	1.0291	0.303433	0.824269	multidrug ABC transporter permease	WP_009902820.1
gene-UAB	UAB_RS0218295	3203	0.121002	0.117625	1.0287	0.30362	0.824269	RNase adapter RapZ	WP_003416961.1
gene-UAB	UAB_RS02000000219825	740.174	0.127721	0.124739	1.0239	0.305882	0.825287	cell wall-binding repeat-containing protein	WP_009901328.1
gene-UAB	UAB_RS02000000220130	10.7437	0.656188	0.63878	1.02725	0.304301	0.825287	0	WP_009901873.1
gene-UAB	UAB_RS0200870	871.937	0.118156	0.11547	1.02326	0.306186	0.825287	0	WP_003421255.1
gene-UAB	UAB_RS0201365	1028.53	-0.37083	0.362366	-1.02336	0.306139	0.825287	0	0
gene-UAB	UAB_RS0201790	4.90149	-2.60179	2.54148	-1.02373	0.305964	0.825287	0	WP_009901648.1
gene-UAB	UAB_RS0202480	593.562	0.144762	0.141394	1.02382	0.305919	0.825287	0	WP_009901740.1
gene-UAB	UAB_RS0204405	21041.7	-0.10563	0.103377	-1.0218	0.306877	0.825287	0	WP_009902072.1
gene-UAB	UAB_RS0204745	1620.23	-0.186709	0.181879	-1.02656	0.304629	0.825287	0	WP_003436912.1
gene-UAB	UAB_RS0210670	14.8965	-0.582996	0.568	-1.0264	0.304702	0.825287	BMC domain-containing protein	WP_009902839.1
gene-UAB	UAB_RS0213375	29.6222	0.472174	0.461727	1.02263	0.306485	0.825287	butyrate kinase	WP_009890632.1
gene-UAB	UAB_RS0214140	312.202	0.149878	0.14624	1.02487	0.305422	0.825287	mannosylglycerate hydrolase	WP_009903258.1
gene-UAB	UAB_RS0216770	743.254	0.132625	0.129737	1.02226	0.306659	0.825287	WYL domain-containing protein	WP_009903505.1
gene-UAB	UAB_RS0218770	1611.26	-0.104584	0.102236	-1.02296	0.306325	0.825287	septum formation initiator family protein	WP_003437861.1
gene-UAB	UAB_RS0206165	1741.92	0.10802	0.106013	1.01893	0.308235	0.82536	0	WP_009902263.1
gene-UAB	UAB_RS0206980	91.587	-0.288374	0.282978	-1.01907	0.30817	0.82536	0	WP_003434333.1
gene-UAB	UAB_RS0207385	372.094	-0.139469	0.136637	-1.02072	0.307385	0.82536	0	WP_003419459.1
gene-UAB	UAB_RS0211225	1206.87	-0.113628	0.111515	-1.01895	0.308225	0.82536	helix-turn-helix transcriptional regulator	WP_003428913.1
gene-UAB	UAB_RS0212530	1229.81	-0.126172	0.123763	-1.01947	0.307982	0.82536	hypothetical protein	WP_009903118.1
gene-UAB	UAB_RS0219135	83.7756	0.276763	0.271514	1.01933	0.308045	0.82536	cell wall hydrolase	WP_009892129.1
gene-UAB	UAB_RS0204665	4210.19	0.112031	0.11025	1.01615	0.309558	0.825932	0	WP_009895762.1
gene-UAB	UAB_RS0209150	232.673	-0.171771	0.1689	-1.017	0.309154	0.825932	cysteine synthase A	WP_009902642.1
gene-UAB	UAB_RS0210355	1848.13	0.118903	0.116986	1.01639	0.309444	0.825932	1-acyl-sn-glycerol-3-phosphate acyltransferase	WP_009902785.1
gene-UAB	UAB_RS0212630	988.898	-0.129646	0.127422	-1.01745	0.308939	0.825932	PLP-dependent aminotransferase family protein	WP_009893561.1
gene-UAB	UAB_RS0217385	2925.02	0.107672	0.10594	1.01635	0.309464	0.825932	nitroreductase family protein	WP_003434301.1
gene-UAB	UAB_RS0205095	3758.61	-0.137388	0.135453	-1.01428	0.310448	0.826529	0	WP_003437525.1
gene-UAB	UAB_RS0208115	3113.57	-0.0998024	0.0983359	-1.01491	0.310147	0.826529	Fis family transcriptional regulator	WP_003419857.1
gene-UAB	UAB_RS0213680	3221.08	0.116281	0.114629	1.01441	0.310385	0.826529	FAD:protein FMN transferase	WP_009897671.1
gene-UAB	UAB_RS0216765	283.321	-0.161893	0.159696	-1.01376	0.310699	0.826605	glutamine amidotransferase	WP_009903504.1
gene-UAB	UAB_RS02000000220315	5.33397	-0.958268	0.94921	-1.00954	0.312715	0.826725	0	WP_032512356.1
gene-UAB	UAB_RS0200035	71.8538	-0.312751	0.309599	-1.01018	0.312408	0.826725	pyridoxal-phosphate dependent enzyme	WP_009901327.1
gene-UAB	UAB_RS0202065	1118.54	0.129508	0.128765	1.00577	0.314524	0.826725	0	WP_009895279.1
gene-UAB	UAB_RS0204540	13515.3	-0.116085	0.115381	-1.0061	0.314367	0.826725	0	WP_003429729.1
gene-UAB	UAB_RS0205270	4780.9	0.0961853	0.0955428	1.00672	0.314067	0.826725	0	WP_004453642.1
gene-UAB	UAB_RS0205495	706.8	-0.139406	0.138651	-1.00544	0.314683	0.826725	0	WP_009888695.1
gene-UAB	UAB_RS0205610	614.617	0.151067	0.1501	1.00644	0.314205	0.826725	0	WP_003437137.1
gene-UAB	UAB_RS0207075	60.5646	0.375393	0.373331	1.00552	0.314645	0.826725	0	WP_009902377.1
gene-UAB	UAB_RS0208230	3164.7	-0.120919	0.119562	-1.01135	0.31185	0.826725	HD domain-containing protein	WP_009896384.1
gene-UAB	UAB_RS0208995	386.267	0.181238	0.17936	1.01047	0.312269	0.826725	N-acetylmuramoyl-L-alanine amidase	WP_009902619.1
gene-UAB	UAB_RS0209595	430.902	-0.139577	0.138618	-1.00692	0.313972	0.826725	pyroglutamyl-peptidase I	WP_003430137.1
gene-UAB	UAB_RS0210295	290.172	-0.169837	0.168878	-1.00568	0.314572	0.826725	carbohydrate kinase	WP_003439483.1
gene-UAB	UAB_RS0210335	383.197	0.163465	0.161924	1.00952	0.312725	0.826725	DUF1653 domain-containing protein	WP_009902781.1
gene-UAB	UAB_RS0211560	19.0237	-0.514298	0.511346	-1.00577	0.314524	0.826725	2Fe-2S iron-sulfur cluster binding domain-containing protein	WP_009902988.1
gene-UAB	UAB_RS0214010	3083.88	0.119943	0.118656	1.01085	0.312088	0.826725	glycosyltransferase	WP_009903250.1
gene-UAB	UAB_RS0214435	1237.79	-0.172583	0.171591	-1.00578	0.314521	0.826725	ACT domain-containing protein	WP_003416152.1
gene-UAB	UAB_RS0216965	2.36653	-1.81996	1.80368	-1.00902	0.312963	0.826725	DNA repair protein RadC	WP_009903548.1
gene-UAB	UAB_RS0218060	3648.3	0.133844	0.133196	1.00486	0.314964	0.826725	phosphoglycerate dehydrogenase	WP_009891785.1
gene-UAB	UAB_RS0218780	1422.46	-0.103595	0.103073	-1.00507	0.314865	0.826725	hypothetical protein	WP_003421411.1
gene-UAB	UAB_RS0200925	170.614	0.197127	0.196794	1.00169	0.316493	0.828984	0	WP_004453966.1
gene-UAB	UAB_RS0209585	3400.68	-0.118077	0.117859	-1.00184	0.316419	0.828984	flavodoxin family protein	WP_004454488.1
gene-UAB	UAB_RS0219755	1238.86	-0.107172	0.106925	-1.00231	0.316196	0.828984	membrane protein insertion efficiency factor YidD	WP_003434233.1
gene-UAB	UAB_RS0215595	2054.61	0.119868	0.11979	1.00065	0.316997	0.82972	DeoR/GlpR transcriptional regulator	WP_003439571.1
gene-UAB	UAB_RS0214190	2227.52	0.116096	0.11616	0.999449	0.317577	0.830655	Stp1/IreP family PP2C-type Ser/Thr phosphatase	WP_003416261.1
gene-UAB	UAB_RS0215435	4453.56	0.106816	0.107089	0.997451	0.318546	0.832088	alanine racemase	WP_009897984.1
gene-UAB	UAB_RS0216550	111.609	-0.236813	0.237431	-0.997396	0.318572	0.832088	PRD domain-containing protein	WP_003439998.1
gene-UAB	UAB_RS0208000	243.777	-0.258174	0.259061	-0.996574	0.318971	0.832546	0	WP_003438546.1
gene-UAB	UAB_RS02000000220585	442.129	-0.151698	0.153972	-0.985231	0.32451	0.835426	hypothetical protein	WP_003428796.1
gene-UAB	UAB_RS0200190	73717.1	-0.151026	0.153307	-0.985123	0.324564	0.835426	elongation factor Tu	WP_009887863.1
gene-UAB	UAB_RS0200600	2344.24	-0.104956	0.106365	-0.986761	0.32376	0.835426	hypothetical protein	WP_009901511.1
gene-UAB	UAB_RS0201040	3896.63	0.157678	0.16001	0.985423	0.324417	0.835426	0	WP_009892548.1
gene-UAB	UAB_RS0204125	529.954	-0.168822	0.171097	-0.986702	0.323789	0.835426	0	WP_009902025.1
gene-UAB	UAB_RS0204600	2189.73	0.10204	0.103069	0.990017	0.322166	0.835426	0	WP_009888508.1
gene-UAB	UAB_RS0204630	209.371	-0.1686	0.169742	-0.993278	0.320575	0.835426	0	WP_003436876.1
gene-UAB	UAB_RS0205965	7068.17	0.0924784	0.0933379	0.990791	0.321788	0.835426	0	WP_009888861.1
gene-UAB	UAB_RS0207250	77.0008	0.290124	0.292535	0.99176	0.321315	0.835426	0	WP_009902393.1
gene-UAB	UAB_RS0207655	1285.07	-0.102351	0.10367	-0.987275	0.323508	0.835426	0	WP_009902424.1
gene-UAB	UAB_RS0208255	143.933	-0.213171	0.215724	-0.988164	0.323072	0.835426	response regulator transcription factor	WP_003438649.1
gene-UAB	UAB_RS0208445	543.318	0.157775	0.15935	0.99012	0.322115	0.835426	ABC transporter ATP-binding protein	WP_009896447.1
gene-UAB	UAB_RS0209220	128.558	0.257848	0.260364	0.990338	0.322009	0.835426	ABC transporter ATP-binding protein	WP_009893181.1
gene-UAB	UAB_RS0209720	1428.13	-0.111768	0.112886	-0.990095	0.322128	0.835426	DNA helicase RecQ	WP_009902726.1
gene-UAB	UAB_RS0210580	2136.87	0.112665	0.113901	0.989148	0.322591	0.835426	hypothetical protein	WP_009902825.1
gene-UAB	UAB_RS0213350	245.262	-0.164998	0.166881	-0.988721	0.3228	0.835426	M20 family metallopeptidase	WP_009893603.1
gene-UAB	UAB_RS0216210	23141.1	-0.0840817	0.084672	-0.993028	0.320696	0.835426	peptide MFS transporter	WP_009903419.1
gene-UAB	UAB_RS0218225	2991.9	0.104193	0.105153	0.990875	0.321746	0.835426	diguanylate cyclase	WP_009903728.1
gene-UAB	UAB_RS0219535	90.0612	-0.299016	0.30341	-0.985517	0.32437	0.835426	sugar kinase	WP_009898823.1
gene-UAB	RS2000000221350	13.8059	0.558477	0.565418	0.987725	0.323287	0.835426	#N/A	#N/A
gene-UAB	UAB_RS0218110	3499.45	0.110705	0.112442	0.984552	0.324844	0.83557	flippase-like domain-containing protein	WP_003429718.1
gene-UAB	UAB_RS0219260	336.62	-0.169672	0.172434	-0.983982	0.325125	0.835714	response regulator transcription factor	WP_003434895.1
gene-UAB	UAB_RS0201575	6309.51	0.118496	0.120557	0.982901	0.325656	0.835825	0	WP_177467728.1
gene-UAB	UAB_RS0204460	14412.5	0.110563	0.11252	0.982609	0.3258	0.835825	0	WP_025992020.1
gene-UAB	UAB_RS0208285	691.496	-0.157746	0.160552	-0.982525	0.325841	0.835825	rhodanese-like domain-containing protein	WP_003438666.1
gene-UAB	UAB_RS0209015	72.9962	-0.279077	0.284431	-0.981177	0.326506	0.836952	manganese catalase family protein	WP_009896673.1
gene-UAB	UAB_RS0202715	9.00782	0.696492	0.712187	0.977962	0.328093	0.840442	0	WP_003425168.1
gene-UAB	UAB_RS0207010	169.88	-0.216932	0.222376	-0.975521	0.329302	0.8418	0	WP_009902364.1
gene-UAB	UAB_RS0214965	1115.65	-0.112517	0.115242	-0.97635	0.328891	0.8418	threonine/serine exporter family protein	WP_003422952.1
gene-UAB	UAB_RS0219370	683.88	0.124687	0.127766	0.975898	0.329115	0.8418	amidohydrolase family protein	WP_009894081.1
gene-UAB	UAB_RS0205960	4794.73	0.145163	0.148881	0.975028	0.329546	0.841847	0	WP_009902249.1
gene-UAB	UAB_RS0201915	837.769	0.135156	0.138816	0.973636	0.330237	0.841879	0	WP_009901674.1
gene-UAB	UAB_RS0210070	2230.95	0.0988738	0.101468	0.97443	0.329843	0.841879	hypothetical protein	WP_004454365.1
gene-UAB	UAB_RS0211390	64.706	-0.336076	0.345041	-0.974018	0.330047	0.841879	response regulator transcription factor	WP_009897205.1
gene-UAB	UAB_RS0204770	4700.12	-0.134816	0.138705	-0.971966	0.331067	0.84284	0	WP_009902124.1
gene-UAB	UAB_RS0219105	612.414	-0.129981	0.133692	-0.972246	0.330928	0.84284	P1 family peptidase	WP_009903818.1
gene-UAB	UAB_RS0214475	2065.76	-0.12528	0.128978	-0.971323	0.331388	0.843079	glycerol-3-phosphate 1-O-acyltransferase PlsY	WP_003426957.1
gene-UAB	UAB_RS02000000220375	450.529	-0.196113	0.202178	-0.970001	0.332046	0.8436	0	WP_009902496.1
gene-UAB	UAB_RS0206880	60.9581	-0.290195	0.299108	-0.9702	0.331947	0.8436	0	WP_009902321.1
gene-UAB	UAB_RS0210315	823.249	-0.11775	0.121481	-0.969284	0.332404	0.843934	MFS transporter	WP_025992028.1
gene-UAB	UAB_RS0203260	23.4019	0.51896	0.535737	0.968683	0.332703	0.843984	0	WP_009901856.1
gene-UAB	UAB_RS0203435	54.002	0.334007	0.345666	0.966271	0.333909	0.843984	0	WP_009901911.1
gene-UAB	UAB_RS0208135	3723.72	-0.11029	0.114164	-0.966067	0.334011	0.843984	0	WP_003429405.1
gene-UAB	UAB_RS0209200	239.744	-0.159181	0.164588	-0.967154	0.333467	0.843984	ABC transporter permease	WP_009889499.1
gene-UAB	UAB_RS0209945	356.797	-0.169827	0.175742	-0.966343	0.333872	0.843984	sensor histidine kinase	WP_009902739.1
gene-UAB	UAB_RS0210220	360.741	0.202784	0.209742	0.966829	0.33363	0.843984	hypothetical protein	WP_003430297.1
gene-UAB	UAB_RS0210590	679.719	0.155747	0.160904	0.96795	0.333069	0.843984	dCMP deaminase	WP_009889849.1
gene-UAB	UAB_RS0205595	4760.73	0.091868	0.0954647	0.962325	0.335887	0.846999	0	WP_009902208.1
gene-UAB	UAB_RS0209080	1986.93	-0.10471	0.108802	-0.96239	0.335854	0.846999	histidinol dehydrogenase	WP_009902633.1
gene-UAB	UAB_RS0210155	5189	0.0894147	0.0928525	0.962976	0.335559	0.846999	lipoprotein	WP_003439536.1
gene-UAB	UAB_RS0204570	175.004	0.187784	0.195465	0.960703	0.336702	0.847336	0	WP_009895731.1
gene-UAB	UAB_RS0216360	2909.87	0.159844	0.166383	0.9607	0.336703	0.847336	PTS sugar transporter subunit IIA	WP_009898137.1
gene-UAB	RS2000000221390	358.71	-0.203447	0.211713	-0.960957	0.336574	0.847336	#N/A	#N/A
gene-UAB	UAB_RS0215525	25.2306	0.4646	0.484102	0.959714	0.337199	0.84801	amidohydrolase	WP_003436121.1
gene-UAB	UAB_RS0212225	6342.96	-0.110987	0.115739	-0.958942	0.337588	0.848415	AI-2E family transporter	WP_003433873.1
gene-UAB	UAB_RS0216025	4385.51	0.0929909	0.0970445	0.958229	0.337947	0.848744	iron ABC transporter permease	WP_004453864.1
gene-UAB	UAB_RS02000000220705	2.5899	-1.47722	1.54709	-0.954835	0.339661	0.849039	site-specific integrase	WP_009903085.1
gene-UAB	UAB_RS0201455	1693.67	-0.132466	0.138684	-0.955165	0.339494	0.849039	0	WP_009901588.1
gene-UAB	UAB_RS0202485	1127.39	-0.107034	0.112085	-0.95494	0.339608	0.849039	0	WP_009901741.1
gene-UAB	UAB_RS0204005	1641.65	0.114505	0.119886	0.955113	0.339521	0.849039	0	WP_003437609.1
gene-UAB	UAB_RS0207120	4905.89	-0.124683	0.130437	-0.955888	0.339129	0.849039	0	WP_003428343.1
gene-UAB	UAB_RS0207445	20946.7	0.129769	0.135721	0.95615	0.338996	0.849039	0	WP_003438306.1
gene-UAB	UAB_RS0211195	2097.7	0.10254	0.107184	0.956679	0.338729	0.849039	alpha/beta hydrolase	WP_009902935.1
gene-UAB	UAB_RS0200660	51.4036	-0.304248	0.319193	-0.953178	0.3405	0.850564	ORF6C domain-containing protein	WP_009894735.1
gene-UAB	UAB_RS0201230	46293.9	-0.11702	0.122932	-0.951906	0.341145	0.851032	0	WP_003421130.1
gene-UAB	UAB_RS0207270	738.519	-0.113387	0.1191	-0.952029	0.341082	0.851032	0	WP_009889058.1
gene-UAB	UAB_RS0200440	7.80552	-0.67618	0.713144	-0.948168	0.343044	0.851206	hypothetical protein	WP_009898424.1
gene-UAB	UAB_RS0202825	621.648	-0.147386	0.155401	-0.948425	0.342913	0.851206	0	WP_009888171.1
gene-UAB	UAB_RS0203910	2557.63	0.106208	0.111778	0.950172	0.342025	0.851206	0	WP_003429657.1
gene-UAB	UAB_RS0205765	1970.99	-0.0889946	0.0936166	-0.950628	0.341793	0.851206	0	WP_009902215.1
gene-UAB	UAB_RS0206515	19002.8	-0.0772952	0.0812527	-0.951294	0.341455	0.851206	0	WP_003438096.1
gene-UAB	UAB_RS0208045	141.355	-0.201629	0.212542	-0.948653	0.342797	0.851206	0	WP_003438585.1
gene-UAB	UAB_RS0209600	83.9334	-0.272564	0.287203	-0.949026	0.342607	0.851206	DUF979 domain-containing protein	WP_009902715.1
gene-UAB	UAB_RS0211670	22.2979	-0.453613	0.477557	-0.949861	0.342183	0.851206	hypothetical protein	WP_003434055.1
gene-UAB	UAB_RS0201225	46904.8	-0.118837	0.125474	-0.947105	0.343585	0.851982	0	WP_009901573.1
gene-UAB	UAB_RS0201045	10066.3	-0.11607	0.123106	-0.94285	0.345758	0.852119	0	WP_003421192.1
gene-UAB	UAB_RS0201110	85857.7	-0.142205	0.151637	-0.937794	0.34835	0.852119	0	WP_009887863.1
gene-UAB	UAB_RS0201690	3045.78	-0.100039	0.107339	-0.931993	0.35134	0.852119	0	WP_009901625.1
gene-UAB	UAB_RS0201710	1.42217	2.09308	2.22551	0.940494	0.346964	0.852119	0	WP_009901629.1
gene-UAB	UAB_RS0202460	491.323	0.128631	0.136065	0.945367	0.344472	0.852119	0	WP_009895328.1
gene-UAB	UAB_RS0202470	1010.42	0.130537	0.139344	0.936795	0.348864	0.852119	0	WP_003436023.1
gene-UAB	UAB_RS0202615	66.4914	-0.33485	0.354838	-0.94367	0.345338	0.852119	0	WP_009901766.1
gene-UAB	UAB_RS0202830	2659.78	0.0904961	0.096773	0.935138	0.349717	0.852119	0	WP_003421079.1
gene-UAB	UAB_RS0203530	665.744	-0.120336	0.12899	-0.932911	0.350866	0.852119	0	WP_003434724.1
gene-UAB	UAB_RS0204315	475.93	-0.138376	0.148567	-0.931402	0.351646	0.852119	0	WP_009902056.1
gene-UAB	UAB_RS0204940	5998.44	-0.113902	0.121506	-0.937416	0.348544	0.852119	0	WP_003437451.1
gene-UAB	UAB_RS0205275	2474.48	0.0983942	0.105522	0.932453	0.351102	0.852119	0	WP_009895854.1
gene-UAB	UAB_RS0206655	667.395	-0.136138	0.145857	-0.933366	0.350631	0.852119	0	WP_009902300.1
gene-UAB	UAB_RS0207615	1406.36	0.108901	0.115376	0.943873	0.345235	0.852119	0	WP_003428201.1
gene-UAB	UAB_RS0207940	122261	-0.112272	0.120118	-0.934683	0.349952	0.852119	0	WP_009902476.1
gene-UAB	UAB_RS0208575	13674	-0.0829193	0.0886431	-0.935428	0.349568	0.852119	ABC transporter permease	WP_003429753.1
gene-UAB	UAB_RS0209890	1234.71	0.107575	0.114326	0.940952	0.34673	0.852119	methyltransferase	WP_004454418.1
gene-UAB	UAB_RS0211145	1343.08	-0.150962	0.161791	-0.933066	0.350786	0.852119	TetR/AcrR family transcriptional regulator	WP_003435217.1
gene-UAB	UAB_RS0212745	2.85791	-1.54119	1.63172	-0.944513	0.344907	0.852119	BlaI/MecI/CopY family transcriptional regulator	WP_004454597.1
gene-UAB	UAB_RS0213520	614.762	0.143515	0.153364	0.935781	0.349386	0.852119	CRISPR-associated protein Cas5	WP_009903199.1
gene-UAB	UAB_RS0214130	32.139	0.450566	0.478173	0.942265	0.346057	0.852119	PTS fructose transporter subunit IIB	WP_004454881.1
gene-UAB	UAB_RS0214195	2438.11	0.103774	0.110187	0.941796	0.346297	0.852119	23S rRNA (adenine(2503)-C(2))-methyltransferase RlmN	WP_003431147.1
gene-UAB	UAB_RS0214300	7199.61	-0.156527	0.167645	-0.933679	0.35047	0.852119	carbon starvation protein A	WP_004454919.1
gene-UAB	UAB_RS0215300	2320.65	0.1191	0.127307	0.935536	0.349512	0.852119	cell wall-binding protein Cwp12	WP_009897962.1
gene-UAB	UAB_RS0215805	2451.02	-0.115128	0.121837	-0.944936	0.344692	0.852119	V-type ATP synthase subunit B	WP_003422669.1
gene-UAB	UAB_RS0216365	1816.84	0.178033	0.191149	0.931387	0.351653	0.852119	PTS sugar transporter subunit IIB	WP_009891383.1
gene-UAB	UAB_RS0216740	7.23318	-0.81787	0.875139	-0.93456	0.350015	0.852119	ketose-bisphosphate aldolase	WP_009903502.1
gene-UAB	UAB_RS0217040	30.5757	0.398449	0.422674	0.942687	0.345841	0.852119	hypothetical protein	WP_009903570.1
gene-UAB	UAB_RS0217290	47.8373	0.30637	0.327858	0.934459	0.350067	0.852119	ABC transporter ATP-binding protein	WP_009903619.1
gene-UAB	UAB_RS0217335	689.354	-0.126409	0.134778	-0.937901	0.348295	0.852119	MerR family transcriptional regulator	WP_009903632.1
gene-UAB	UAB_RS0218845	378.345	0.14184	0.150348	0.94341	0.345471	0.852119	prepilin-type N-terminal cleavage/methylation domain-containing protein	WP_009903805.1
gene-UAB	UAB_RS0218925	2726.8	-0.122037	0.130656	-0.934028	0.35029	0.852119	16S rRNA (adenine(1518)-N(6)/adenine(1519)-N(6))-dimethyltransferase RsmA	WP_003437899.1
gene-UAB	UAB_RS0219010	15207.6	0.0786013	0.0835481	0.940791	0.346812	0.852119	methionine--tRNA ligase	WP_003435867.1
gene-UAB	UAB_RS0219355	4233.8	-0.132968	0.141548	-0.939379	0.347536	0.852119	SDR family oxidoreductase	WP_003429183.1
gene-UAB	RS2000000221400	2274.92	-0.110557	0.117503	-0.940885	0.346764	0.852119	#N/A	#N/A
gene-UAB	UAB_RS0203545	216.836	-0.188855	0.203151	-0.929628	0.352564	0.853768	0	WP_009901944.1
gene-UAB	UAB_RS0202885	26.5311	-0.402794	0.433921	-0.928265	0.35327	0.854367	0	WP_003434206.1
[truncated: 2,224 more rows]
